# Supplementary material for: DABCO-promoted highly diastereo- and regioselective construction of C-3 functionalized spirooxindoles via [3 + 2] cycloaddition of 2-aryl/heteroarylidene-1H-indene-1,3(2H)-diones with N-2,2,2-trifluoroethylisatin ketimines at ambient conditions
Source: Royal Society of Chemistry journal article supplement (doi:10.1039/d2ra07141j), 2022-01-01
Supplement: d2ra07141j1.pdf [file d2ra07141j1.pdf]

## Supporting Information

### DABCO-promoted highly diastereo- and regioselective construction of C-3 functionalized spirooxindoles *via* [3+2] cycloaddition of 2-aryl/heteroarylidene-1*H*-indene-1,3(2*H*)-diones with *N*-2,2,2-trifluoroethylisatin ketimines at ambient conditions

Madavi S. Prasad,<sup>\*a</sup> Sankar Bharani,<sup>a</sup> Syed Mastan Sharief,<sup>a</sup> Mudavath Ravi,<sup>a</sup> Murugesan Sivaprakash,<sup>a</sup> Biplob Borah,<sup>b</sup> and L. Raju Chowhan<sup>\*b</sup>

<sup>a</sup>*Asymmetric Synthesis and Catalysis Laboratory, Department of Chemistry, Central University of Tamil Nadu, Thiruvarur, 610 005, India*

[shivaprasad@cutn.ac.in](mailto:shivaprasad@cutn.ac.in) and [shivacutn@gmail.com](mailto:shivacutn@gmail.com)

<sup>b</sup>*School of Applied Material Sciences, Centre for Applied Chemistry, Central University of Gujarat, Sector-30, Gandhinagar-382030, Gujarat, India.*

[rajuchowhan@gmail.com](mailto:rajuchowhan@gmail.com)

## Table of Contents

---

|                                              |          |
|----------------------------------------------|----------|
| 1) General experimental procedures           | S2-S3    |
| 2) Characterization data for products        | S4-S16   |
| 3) Single Crystal X-ray data for compound 4a | S17-S18  |
| 4) NMR spectral data for products 4a- 4f'    | S19-S114 |
| 5) HPLC data of compound 4a                  | S115-118 |

## EXPERIMENTAL SECTION

### 1.1 General Experimental Procedures

*Nuclear Magnetic Resonance Spectroscopy:*  $^1\text{H}$  NMR spectra were acquired on Bruker AVIII400 (400 MHz) spectrometer and were referenced to TMS and residual non-deuterated solvent peak in  $\text{CDCl}_3$  ( $\delta = 7.26$ ). Chemical shifts ( $\delta\text{H}$  and  $\delta\text{C}$ ) are reported in parts per million (ppm), with signal splitting recorded as singlet (s), doublet (d), triplet (t), quartet (q), and multiplet and unresolved peaks (m). Coupling constants ( $J$ ) are mentioned in Hz and are presented as observed.  $^{13}\text{C}$  NMR spectra were obtained on Bruker AVIII400 (100 MHz) spectrometers and were referenced to solvent peaks in  $\text{CDCl}_3$  ( $\delta = 77.0$ ) and  $\text{DMSO-D}_6$  ( $\delta = 39.0$ ).

*Mass Spectrometry:* High-resolution mass spectra (HRMS) were recorded by the Thermo Fisher spectrometer using electrospray ionization (ESI<sup>+</sup>). The parent ion  $[\text{M}+\text{H}]^+$   $[\text{M}+\text{Na}]^+$  is calculated to 4 decimal places from the molecular formula, and all values are within a tolerance of 5 ppm.

*Specific rotations:* Optical rotations were recorded on an Anton Parr MCP100 polarimeter with a path length of 1 dm (using the sodium D line, 589 nm). Specific rotations ( $[\alpha]_D$ ) are reported in units of  $10^{-1}$  deg  $\text{cm}^2 \text{g}^{-1}$ . Concentrations are reported in g/mL. Temperatures are reported in  $^\circ\text{C}$  (typically  $25^\circ\text{C}$ ).

*Infrared Spectroscopy:* Absorption spectra were obtained on a Shimadzu FT-IR spectrometer. Wavelengths of maximum absorbance ( $\nu_{\text{max}}$ ) are quoted in wavenumbers ( $\text{cm}^{-1}$ ). Only selected characteristic IR absorption data are provided for each compound.

*Single Crystal XRD:* Data was collected from Sophisticated Analytical Instrumental Facility, Indian Institute of Technology Madras- Chennai.

#### Materials:

Unless otherwise stated, all reactions were carried out in oven-dried glassware, using anhydrous reaction solvents. All other commercially available reagents and solvents were either used as received and/or dried and purified before use using standard procedures.

**General Procedure A:** *Preparation of isatin derived ketimines:*

**1a-g** were prepared by following the reported literature procedure.<sup>1</sup>

**General Procedure B:** *Preparation of indane-1,3-dione enophiles:*

**2a-2z** were synthesized using a literature report.<sup>2</sup> All the NMR's were consistent with the literature.

**General Procedure C:** *[3+2]-cycloaddition:*

To an oven dried vial containing catalyst **3c** (0.05 equiv.), the indane-1,3-dione enophile (1.0 equiv.) was added followed by the addition of Ketimine (1.1 equiv.) in toluene (0.2M). The resulting mixture was stirred at RT for 5-12 hours; the crude product was directly purified by centrifugal process.

**General Procedure D:** *Catalytic asymmetric reaction:*

To an oven dried vial containing Quinine (5mol%), enophile (**2**) was added followed by the addition of Ketimine (**1**) in DCM (0.1M). The resulting mixture was stirred at RT for 5 hours; the crude product was directly purified by column chromatography.

**References:**

- 1) Wang, X, Huang, D, Wang, K-H, et al. Tin powder promoted synthesis of trifluoroethylamine-containing 3,3'-disubstituted oxindoles. *Appl Organometal Chem.* 2019; 33:e4995.
- 2) Zhi-Feng Hao, Shi-Jie Zhu, Yong-Jia Hao, Wen-Hui Zhang, Ying Zhou, You-Ping Tian and Chuan-Wen Lei. *New J. Chem.*, 2021,45, 18776-18780.

**(2'R,4'S,5'S)-1''-methyl-4'-phenyl-5'-(trifluoromethyl)dispiro[indene-2,3'-pyrrolidine-2',3''-indoline]-1,2'',3-trione (4a):**

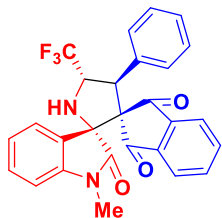

Prepared by following general procedure **D** purified by centrifuge using hexane and isolated product **4a** in 91% yield as a white solid with M. P. 246 - 250 °C; The enantiomeric excess (ee) was determined by chiral stationary phase HPLC using a Daicel Chiralpak I-A column (hexane/EtOAc = 75:25, flow rate 0.5 mL/min,  $\lambda$  = 254 nm),  $t_R$  = 17.842 min (minor),  $t_R$  = 41.064 min (major),  $[\alpha]_D^{25}$  = **-53.000 (CHCl<sub>3</sub>, c = 0.12 g/100ml for 87%ee)**; IR (neat)  $\nu_{\max}$  1741, 1691, 1618, 1462, 1350 and 752 cm<sup>-1</sup>; **<sup>1</sup>H NMR (400 MHz, CDCl<sub>3</sub>)**  $\delta$  7.69 - 7.51 (4H, d, m), 7.21 - 7.17 (3H, m), 7.14 - 7.02 (4H, m), 6.81 (1H, t,  $J$  = 7.7 Hz), 6.59 (1H, d,  $J$  = 7.8 Hz), 5.45 (1H, d,  $J$  = 10.6 Hz), 5.30 - 5.20 (1H, m), 3.17 (1H, s), 3.16 (3H, s); **<sup>13</sup>C NMR (100 MHz, CDCl<sub>3</sub>+DMSO-d<sub>6</sub> (2drops), DEPT-135)**  $\delta$  197.6 (C, C=O), 195.3 (C, C=O), 175.2 (C, N-C=O), 143.6 (C), 141.7 (C), 141.5 (C), 136.1 (CH), 135.9 (CH), 132.8 (C), 130.3 (CH), 125.9 (CF<sub>3</sub>, q,  $J$  = 278 Hz), 128.6 (2CH), 128.2 (2CH), 127.7 (CH), 125.3 (CH), 122.9 (C), 122.6 (2CH), 121.8 (CH), 108.1 (CH), 71.1 (C), 70.8 (C), 60.7 (CH, q,  $J$  = 31 Hz), 47.6 (CH), 24.8 (CH<sub>3</sub>); **<sup>19</sup>F NMR (376MHz, CDCl<sub>3</sub>)**  $\delta$  -172.74; HRMS (ESI)  $m/z$ : 499.1240 [M + Na]<sup>+</sup>, calcd for C<sub>27</sub>H<sub>19</sub>F<sub>3</sub>N<sub>2</sub>O<sub>3</sub>Na; Found 499.1247.

**4'-(3-fluorophenyl)-1''-methyl-5'-(trifluoromethyl)dispiro[indene-2,3'-pyrrolidine-2',3''-indoline]-1,2'',3-trione (4b):**

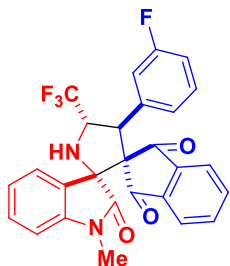

Prepared by following general procedure **C** purified by centrifuge using hexane and isolated product **4b** in 72% yield as a white solid with M. P. 245 °C.; IR (neat)  $\nu_{\max}$  1703, 1612, 1253, 1116 and 756 cm<sup>-1</sup>; **<sup>1</sup>H NMR (400 MHz, CDCl<sub>3</sub>)**  $\delta$  7.73-7.56 (4H, d, m), 7.71 - 7.05 (3H, m), 7.01 - 6.94 (2H, m), 6.83-6.73 (2H, m), 6.60 (1H, d,  $J$  = 7.8 Hz), 5.45 (1H, d,  $J$  = 10.6 Hz), 5.25 - 5.15 (1H, m), 3.17 (1H, s), 3.16 (3H, s); **<sup>13</sup>C NMR (100 MHz, CDCl<sub>3</sub>+DMSO-d<sub>6</sub> (2drops), DEPT-135)**  $\delta$  197.4 (C, C=O), 195.1 (C, C=O), 175.0 (C, N-C=O), 161.9 (C, C-F, d,  $J$  = 244 Hz), 143.6 (C), 141.7 (C), 141.4 (C), 136.2 (CH), 136.1 (CH), 135.7 (C), 135.6 (C), 130.4 (C), 130.0 (CH, d,  $J$  = 8 Hz), 125.9 (CF<sub>3</sub>, q,  $J$  = 279 Hz), 125.3 (2CH), 124.7 (CH, d,  $J$  = 3 Hz), 122.8 (2CH), 121.9 (CH), 115.5 (CH, d,  $J$  = 23 Hz), 114.8 (CH, d,  $J$  = 20 Hz), 108.1 (CH), 71.4 (C), 70.7 (C), 60.9 (CH, q,  $J$  = 30 Hz), 48.1 (CH), 26.0 (CH<sub>3</sub>); **<sup>19</sup>F NMR (376MHz, CDCl<sub>3</sub>)**  $\delta$  -72.84, -112.16; HRMS (ESI)  $m/z$ : 517.1145 [M + Na]<sup>+</sup>, calcd for C<sub>27</sub>H<sub>18</sub>F<sub>4</sub>N<sub>2</sub>O<sub>3</sub>Na; Found 517.1174.

**4'-(4-fluorophenyl)-1''-methyl-5'-(trifluoromethyl)dispiro[indene-2,3'-pyrrolidine-2',3''-indoline]-1,2'',3-trione (4c):**

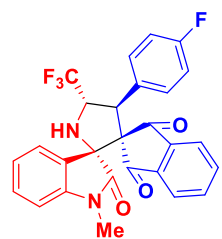

Prepared by following general procedure **D** purified by centrifuge using hexane and isolated product **4c** in 82% yield as a pale white solid with M. P. 231 °C.; The

enantiomeric excess (ee) was determined by chiral stationary phase HPLC using a Daicel Chiralpak I-A column (hexane/EtOAc = 75:25, flow rate 1 mL/min,  $\lambda$  = 254 nm),  $t_R$  = 8.660 min (minor),  $t_R$  = 23.451 min (major),  $[\alpha]_D^{25}$  = **-2.300 (CHCl<sub>3</sub>, c = 0.11 g/100ml for 32%ee)**; IR (neat)  $\nu_{\max}$  2360, 1735, 1695, 1263, 1157 and 754 cm<sup>-1</sup>; **<sup>1</sup>H NMR (400 MHz, CDCl<sub>3</sub>)**  $\delta$  7.72-7.56 (4H, d, m), 7.65 - 7.56 (3H, m), 7.22 - 7.10 (4H, m), 6.80 (3H, q,  $J$  = 8.5 Hz), 6.60 (1H, d,  $J$  = 7.8 Hz), 5.44 (1H, d,  $J$  = 10.6 Hz), 5.25 - 5.15 (1H, m), 3.15 (4H, s); **<sup>13</sup>C NMR (100 MHz, CDCl<sub>3</sub>, DEPT-135)**  $\delta$  198.8 (C, C=O), 195.4 (C, C=O), 175.3 (C, N-C=O), 162.2 (C, C-F, d,  $J$  = 246 Hz), 144.3 (C), 142.3 (C), 141.7 (C), 136.1 (2CH), 130.7 (CH), 130.5 (CH), 130.4 (CH), 128.4 (CH, d,  $J$  = 4 Hz), 124.7 (CH), 124.2 (CF<sub>3</sub>, q,  $J$  = 278 Hz), 123.4 (C), 123.1 (CH), 122.9 (CH), 122.3 (CH), 115.6 (CH), 115.4 (CH), 108.4 (CH), 70.8 (C), 70.7 (C), 61.4 (CH, q,  $J$  = 30 Hz), 48.8 (CH), 26.4 (CH<sub>3</sub>); **<sup>19</sup>F NMR (376MHz, CDCl<sub>3</sub>)**  $\delta$  -72.81, -113.89; HRMS (ESI) m/z: 517.1145 [M + Na]<sup>+</sup>, calcd for C<sub>27</sub>H<sub>18</sub>F<sub>4</sub>N<sub>2</sub>O<sub>3</sub>Na; Found 517.1151.

**4'-(2-chlorophenyl)-1''-methyl-5'-(trifluoromethyl)dispiro[indene-2,3'-pyrrolidine-2',3''-indoline]-1,2'',3-trione (4d):**

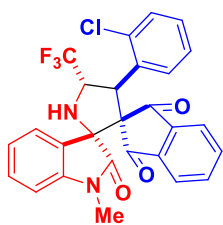

Prepared by following general procedure **C** purified by centrifuge using hexane and isolated product **4d** in 73% yield as a white solid with M. P. 248 - 252 °C.; IR (neat)  $\nu_{\max}$  2360, 1695, 1612, 1473, 1257 and 754 cm<sup>-1</sup>; **<sup>1</sup>H NMR (400 MHz, CDCl<sub>3</sub>)**  $\delta$  7.66 - 7.56 (4H, d, m), 7.38 (1H, d,  $J$  = 7.9 Hz), 7.22 (1H, d,  $J$  = 7.6 Hz), 7.15 (2H, t,  $J$  = 7.9 Hz), 7.05 (1H, t,  $J$  = 7.6 Hz), 6.97 (1H, t,  $J$  = 7.7 Hz), 6.82 (1H, t,  $J$  = 7.6 Hz), 6.63 (1H, d,  $J$  = 7.8 Hz), 6.37 (1H, d,  $J$  = 10.6 Hz), 5.07 - 5.06 (1H, m), 3.21 (4H, s); **<sup>13</sup>C NMR (100 MHz, CDCl<sub>3</sub>, DEPT-135)**  $\delta$  199.2 (C, C=O), 194.4 (C, C=O), 175.4 (C, N-C=O), 144.7 (C), 142.4 (C), 141.5 (C), 136.1 (CH), 135.8 (CH), 135.6 (C), 130.7 (CH), 130.6 (C), 130.3 (CH), 129.1 (CH), 129.0 (CH), 126.6 (CH), 125.6 (CF<sub>3</sub>, q,  $J$  = 279 Hz), 125.1 (CH), 123.4 (C), 123.3 (CH), 122.8 (CH), 122.2 (CH), 108.3 (CH), 70.6 (C), 70.3 (C), 62.5 (CH, q,  $J$  = 30 Hz), 45.1 (CH), 26.4 (CH<sub>3</sub>); **<sup>19</sup>F NMR (376MHz, CDCl<sub>3</sub>)**  $\delta$  -72.80; HRMS (ESI) m/z: 533.0850 [M + Na]<sup>+</sup>, calcd for C<sub>27</sub>H<sub>18</sub>ClF<sub>3</sub>N<sub>2</sub>O<sub>3</sub>Na; Found 533.0860.

**4'-(3-chlorophenyl)-1''-methyl-5'-(trifluoromethyl)dispiro[indene-2,3'-pyrrolidine-2',3''-indoline]-1,2'',3-trione (4e):**

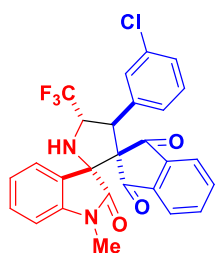

Prepared by following general procedure **C** purified by centrifuge using hexane and isolated product **4e** in 67% yield as a white solid with M. P. 245 - 248 °C.; IR (neat)  $\nu_{\max}$  2360, 1707, 1612, 1350, 1255, 1122 and 754 cm<sup>-1</sup>; **<sup>1</sup>H NMR (400 MHz, CDCl<sub>3</sub>)**  $\delta$  7.73 - 7.56 (4H, d, m), 7.23 (1H, br, s), 7.17-7.03 (5H, m), 6.81 (1H, t,  $J$  = 8 Hz), 6.60 (1H, d,  $J$  = 7.8 Hz), 5.42 (1H, t,  $J$  = 10.6 Hz), 5.25 - 5.15 (1H, m), 3.16 (1H, s), 3.15 (3H, s); **<sup>13</sup>C NMR (100 MHz, CDCl<sub>3</sub>, DEPT-135)**  $\delta$  198.5 (C, C=O), 195.1 (C, C=O), 175.2 (C, N-C=O), 144.3 (C), 142.3 (C), 141.6 (C), 136.1 (2CH), 134.8 (C), 134.3 (C), 130.7 (CH), 129.8 (CH), 128.9 (CH), 128.3 (CH), 127.1 (CH), 125.6 (CF<sub>3</sub>, q,  $J$  = 279 Hz), 124.7 (CH), 123.2 (C), 123.2

(CH), 122.9 (CH), 122.3 (CH), 108.4 (CH), 70.8 (C), 70.7 (C), 61.2 (CH, q,  $J = 31$  Hz), 48.9 (CH), 26.4 (CH<sub>3</sub>); <sup>19</sup>F NMR (376MHz, CDCl<sub>3</sub>)  $\delta$  -72.82; HRMS (ESI)  $m/z$ : 511.1030 [M + H]<sup>+</sup>, calcd for C<sub>27</sub>H<sub>19</sub>ClF<sub>3</sub>N<sub>2</sub>O<sub>3</sub>; Found 511.1044.

**4'-(4-chlorophenyl)-1''-methyl-5'-(trifluoromethyl)dispiro[indene-2,3'-pyrrolidine-2',3''-indoline]-1,2'',3-trione (4f):**

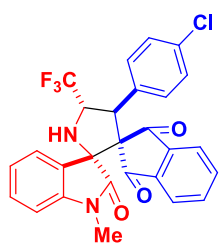

Prepared by following general procedure **C** purified by centrifuge using hexane and isolated product **4f** in 96% yield as a lace white solid with M. P. 221 - 225 °C.; IR (neat)  $\nu_{\max}$  2360, 1703, 1614, 1261, 1132 and 759 cm<sup>-1</sup>; <sup>1</sup>H NMR (400 MHz, CDCl<sub>3</sub>)  $\delta$  7.72 - 7.57 (4H, d, m), 7.18 - 7.07 (6H, m), 6.81 (1H, t,  $J = 7.6$  Hz), 6.59 (1H, d,  $J = 7.8$  Hz), 5.47 (1H, d,  $J = 10.6$  Hz), 5.26 - 5.15 (1H, m), 3.16 (1H, s), 3.15 (3H, s); <sup>13</sup>C NMR (100 MHz, CDCl<sub>3</sub>, DEPT-135)  $\delta$  198.6 (C, C=O), 195.2 (C, C=O), 175.2 (C, N-C=O), 144.2 (C), 142.3 (C), 141.6 (C), 136.1 (2CH), 133.9 (C), 131.2 (C), 130.7 (CH), 130.2 (2CH), 128.7 (2CH), 125.7 (CF<sub>3</sub>, q,  $J = 278$  Hz), 124.6 (CH), 123.2 (C), 123.2 (CH), 122.9 (CH), 122.3 (CH), 108.4 (CH), 70.8 (C), 70.7 (C), 61.2 (CH, q,  $J = 31$  Hz), 48.7 (CH), 26.4 (CH<sub>3</sub>); <sup>19</sup>F NMR (376MHz, CDCl<sub>3</sub>)  $\delta$  -72.84; HRMS (ESI)  $m/z$ : 533.0850 [M + Na]<sup>+</sup>, calcd for C<sub>27</sub>H<sub>18</sub>ClF<sub>3</sub>N<sub>2</sub>O<sub>3</sub>Na; Found 533.0858.

**4'-(2-bromophenyl)-1''-methyl-5'-(trifluoromethyl)dispiro[indene-2,3'-pyrrolidine-2',3''-indoline]-1,2'',3-trione (4g):**

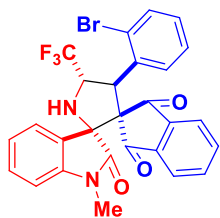

Prepared by following general procedure **C** purified by centrifuge using hexane and isolated product **4g** in 72% yield as a white solid with M. P. 240- 244 °C.; IR (neat)  $\nu_{\max}$  2360, 1737, 1693, 1255, 1116 and 763 cm<sup>-1</sup>; <sup>1</sup>H NMR (400 MHz, CDCl<sub>3</sub>)  $\delta$  7.77 - 7.58 (4H, d, m), 7.38 (2H, d,  $J = 8.0$  Hz), 7.23 (1H, d,  $J = 7.6$  Hz), 7.15 (1H, t,  $J = 7.2$  Hz), 7.08 (1H, t,  $J = 7.3$  Hz), 6.90 (1H, t,  $J = 7.9$  Hz), 6.83 (1H, t,  $J = 7.6$  Hz), 6.63 (1H, d,  $J = 7.8$  Hz), 6.41 (1H, d,  $J = 10.6$  Hz), 5.08 - 4.98 (1H, m), 3.21 (3H, s), 3.20 (1H, d,  $J = 6.9$  Hz); <sup>13</sup>C NMR (100 MHz, CDCl<sub>3</sub>, DEPT-135)  $\delta$  199.2 (C, C=O), 194.3 (C, C=O), 175.3 (C, N-C=O), 144.7 (C), 142.5 (C), 141.5 (C), 136.1 (CH), 135.8 (CH), 133.8 (CH), 132.4 (C), 130.7 (CH), 129.3 (CH), 129.2 (CH), 127.2 (CH), 126.4 (C), 125.6 (CF<sub>3</sub>, q,  $J = 279$  Hz), 125.1 (CH), 123.4 (C), 123.3 (CH), 122.8 (CH), 122.2 (CH), 108.3 (CH), 70.7 (C), 70.3 (C), 62.9 (CH, q,  $J = 30$  Hz), 47.8 (CH), 26.4 (CH<sub>3</sub>); <sup>19</sup>F NMR (376MHz, CDCl<sub>3</sub>)  $\delta$  -172.69; HRMS (ESI)  $m/z$ : 577.0345 [M + Na]<sup>+</sup>, calcd for C<sub>27</sub>H<sub>18</sub>BrF<sub>3</sub>N<sub>2</sub>O<sub>3</sub>Na; Found 577.0357.

**4'-(3-bromophenyl)-1''-methyl-5'-(trifluoromethyl)dispiro[indene-2,3'-pyrrolidine-2',3''-indoline]-1,2'',3-trione (4h):**

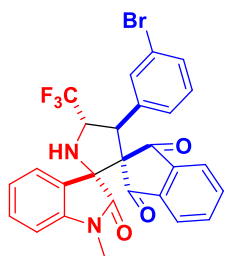

Prepared by following general procedure **C** purified by centrifuge using hexane and isolated product **4h** in 63% yield as a white solid with M. P. 250 - 254 °C.; IR (neat)  $\nu_{\max}$  3317, 1703, 1612, 1352, 1265, 1163 and 754  $\text{cm}^{-1}$ ; **<sup>1</sup>H NMR (400 MHz, CDCl<sub>3</sub>)**  $\delta$  7.74 - 7.57 (4H, d, m), 7.38 (1H, br, s), 7.20-7.11 (4H, m), 6.98 (1H, t,  $J$  = 7.9 Hz), 6.82 (1H, t,  $J$  = 7.64 Hz), 6.60 (1H, d,  $J$  = 7.8 Hz), 5.41 (1H, d,  $J$  = 10.6 Hz), 5.24 - 5.14 (1H, m), 3.16 (1H, s), 3.15 (3H, s); **<sup>13</sup>C NMR (100 MHz, CDCl<sub>3</sub>+DMSO-d<sub>6</sub> (2drops), DEPT-135)**  $\delta$  198.0 (C, C=O), 194.8 (C, C=O), 174.9 (C, N-C=O), 143.9 (C), 141.9 (C), 141.4 (C), 135.9 (CH), 135.9 (CH), 134.9 (C), 131.6 (CH), 130.9 (CH), 130.5 (CH), 129.8 (CH), 127.3 (CH), 125.4 (CF<sub>3</sub>, q,  $J$  = 279 Hz), 124.5 (CH), 122.9 (CH), 122.9 (C), 122.7 (CH), 122.2 (C), 122.1 (CH), 108.1 (CH), 70.7 (C), 70.5 (C), 60.8 (CH, q,  $J$  = 31 Hz), 48.5 (CH), 26.1 (CH<sub>3</sub>); **<sup>19</sup>F NMR (376MHz, CDCl<sub>3</sub>)**  $\delta$  -72.81; HRMS (ESI)  $m/z$ : 577.0345 [M + Na]<sup>+</sup>, calcd for C<sub>27</sub>H<sub>18</sub>BrF<sub>3</sub>N<sub>2</sub>O<sub>3</sub>Na; Found 5577.0360.

**4'-(4-bromophenyl)-1''-methyl-5'-(trifluoromethyl)dispiro[indene-2,3'-pyrrolidine-2',3''-indoline]-1,2'',3-trione (4i):**

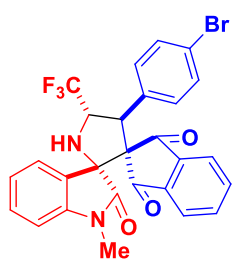

Prepared by following general procedure **C** purified by centrifuge using hexane and isolated product **4i** in 85% yield as a lace white solid with M. P. 226 - 230 °C.; IR (neat)  $\nu_{\max}$  2360, 1726, 1614, 1257, 1120 and 758  $\text{cm}^{-1}$ ; **<sup>1</sup>H NMR (400 MHz, CDCl<sub>3</sub>)**  $\delta$  7.73 - 7.57 (4H, d, m), 7.24 (2H, d,  $J$  = 8.5 Hz), 7.16-7.10 (4H, m), 6.81 (1H, t,  $J$  = 7.6 Hz), 6.59 (1H, d,  $J$  = 7.8 Hz), 5.41 (1H, d,  $J$  = 10.6 Hz), 5.26 - 5.15 (1H, m), 3.18 (1H, s), 3.15 (3H, s); **<sup>13</sup>C NMR (100 MHz, CDCl<sub>3</sub>, DEPT-135)**  $\delta$  198.6 (C, C=O), 195.2 (C, C=O), 175.2 (C, N-C=O), 144.2 (C), 142.3 (C), 141.6 (C), 136.1 (2CH), 131.7 (CH), 131.7 (C), 130.7 (2CH), 130.5 (2CH), 125.6 (CF<sub>3</sub>, q,  $J$  = 278 Hz), 124.6 (CH), 123.2 (C), 123.2 (CH), 122.9 (CH), 122.3 (CH), 122.1 (C), 108.4 (CH), 70.8 (C), 70.6 (C), 61.2 (CH, q,  $J$  = 31 Hz), 48.7 (CH), 26.4 (CH<sub>3</sub>); **<sup>19</sup>F NMR (376MHz, CDCl<sub>3</sub>)**  $\delta$  -72.84; HRMS (ESI)  $m/z$ : 577.0345 [M + Na]<sup>+</sup>, calcd for C<sub>27</sub>H<sub>18</sub>BrF<sub>3</sub>N<sub>2</sub>O<sub>3</sub>Na; Found 577.0353.

**1''-methyl-4'-(o-tolyl)-5'-(trifluoromethyl)dispiro[indene-2,3'-pyrrolidine-2',3''-indoline]-1,2'',3-trione (4j):**

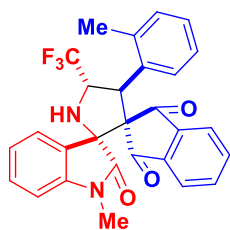

Prepared by following general procedure **C** purified by centrifuge using hexane and isolated product **4j** in 64% yield as a pale yellow solid with M. P. 240 - 244 °C.; IR (neat)  $\nu_{\max}$  2360, 1726, 1693, 1469, 1253, 1114 and 756  $\text{cm}^{-1}$ ; **<sup>1</sup>H NMR (400 MHz, CDCl<sub>3</sub>)**  $\delta$  7.80 (1H, d,  $J$  = 7.24 Hz), 7.63 - 7.52 (3H, m), 7.32 - 7.28 (1H, m), 7.22 (1H, d,  $J$  = 7.56 Hz), 7.14 (1H, t,  $J$  = 6.9 Hz), 6.99 - 6.92 (3H, m), 6.83 (1H, t,  $J$  = 7.6 Hz), 6.61 (1H, d,  $J$  = 7.7 Hz), 6.07 (1H, d,  $J$  = 10.7 Hz), 5.11 - 5.03 (1H, m), 3.22 - 3.18 (4H, m), 2.42 (3H, s); **<sup>13</sup>C NMR (100 MHz, CDCl<sub>3</sub>, DEPT-135)**  $\delta$  199.6 (C, C=O), 195.7 (C, C=O), 175.5 (C, N-C=O), 144.4 (C), 142.2 (C), 141.9 (C), 138.2 (C), 135.9 (2CH), 131.1 (2CH), 130.5 (C),

127.6 (CH), 127.4 (CH), 125.8 (CF<sub>3</sub>, q, *J* = 278 Hz), 125.8 (CH), 124.9 (CH), 123.5 (C), 123.1 (CH), 122.9 (CH), 122.2 (CH), 108.3 (CH), 70.8 (C), 70.5 (C), 62.7 (CH, q, *J* = 31 Hz), 44.5 (CH), 26.4 (CH<sub>3</sub>), 19.7 (CH<sub>3</sub>); <sup>19</sup>F NMR (376MHz, CDCl<sub>3</sub>) δ -72.89; HRMS (ESI) *m/z*: 513.1396 [M + Na]<sup>+</sup>, calcd for C<sub>28</sub>H<sub>21</sub>F<sub>3</sub>N<sub>2</sub>O<sub>3</sub>Na; Found 513.1404.

**1''-methyl-4'-(p-tolyl)-5'-(trifluoromethyl)dispiro[indene-2,3'-pyrrolidine-2',3''-indoline]-1,2'',3-trione (4k):**

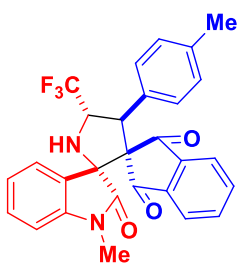

Prepared by following general procedure **C** purified by centrifuge using hexane and isolated product **4k** in 68% yield as a lace white solid with M. P. 216 - 220 °C.; IR (neat)  $\nu_{\max}$  2360, 1703, 1261, 1114 and 754 cm<sup>-1</sup>; <sup>1</sup>H NMR (400 MHz, CDCl<sub>3</sub>) δ 7.71 - 7.51 (4H, d, m), 7.17 (1H, d, *J* = 7.5 Hz), 7.13-7.08 (3H, m), 6.89 (2H, d, *J* = 8.0 Hz), 6.81 (1H, t, *J* = 7.6 Hz), 6.59 (1H, d, *J* = 7.8 Hz), 5.42 (1H, d, *J* = 10.6 Hz), 5.27 - 5.17 (1H, m), 3.17 - 3.15 (4H, s), 2.13 (3H, s); <sup>13</sup>C NMR (100 MHz, CDCl<sub>3</sub>, DEPT-135) δ 198.9 (C, C=O), 195.6 (C, C=O), 175.4 (C, N-C=O), 144.3 (C), 142.4 (C), 141.8 (C), 137.6 (C), 135.8 (CH), 135.8 (CH), 130.5 (CH), 129.4 (C), 129.3 (2C), 128.6 (2C), 125.8 (CF<sub>3</sub>, q, *J* = 279 Hz), 124.7 (CH), 123.6 (C), 123.0 (CH), 122.8 (CH), 122.2 (CH), 108.3 (CH), 70.9 (C), 70.7 (C), 61.2 (CH, q, *J* = 30 Hz), 49.3 (CH), 26.4 (CH<sub>3</sub>), 20.9 (CH<sub>3</sub>); <sup>19</sup>F NMR (376MHz, CDCl<sub>3</sub>) δ -72.73; HRMS (ESI) *m/z*: 513.1396 [M + Na]<sup>+</sup>, calcd for C<sub>28</sub>H<sub>21</sub>F<sub>3</sub>N<sub>2</sub>O<sub>3</sub>Na; Found 513.1406.

**4'-(3-methoxyphenyl)-1''-methyl-5'-(trifluoromethyl)dispiro[indene-2,3'-pyrrolidine-2',3''-indoline]-1,2'',3-trione (4l):**

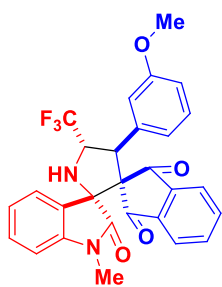

Prepared by following general procedure **C** purified by centrifuge using hexane and isolated product **4l** in 78% yield as a white solid with M. P. 260 - 263 °C.; IR (neat)  $\nu_{\max}$  2360, 2341, 1610, 1346, 1257, 1114 and 690 cm<sup>-1</sup>; <sup>1</sup>H NMR (400 MHz, CDCl<sub>3</sub>) δ 7.72 - 7.54 (4H, d, m), 7.18 (1H, d, *J* = 7.5 Hz), 7.12 (1H, d, *J* = 7.7 Hz), 7.0 (1H, t, *J* = 7.9 Hz), 6.83 - 6.79 (2H, m), 6.73 (1H, br, m), 6.61 - 6.57 (2H, m), 5.43 (1H, d, *J* = 10.6 Hz), 5.25 - 5.19 (1H, m), 3.66 (3H, m), 3.19 (1H, s), 3.16 (3H, s); <sup>13</sup>C NMR (100 MHz, CDCl<sub>3</sub>, DEPT-135) δ 198.8 (C, C=O), 195.6 (C, C=O), 175.4 (C, N-C=O), 159.3 (C), 144.3 (C), 142.4 (C), 141.7 (C), 135.9 (CH), 134.1 (C), 130.6 (CH), 129.5 (2CH), 125.8 (CF<sub>3</sub>, q, *J* = 279 Hz), 124.8 (CH), 123.5 (C), 123.1 (CH), 122.9 (CH), 122.3 (CH), 120.9 (CH), 114.2 (CH), 113.9 (CH), 108.3 (CH), 70.9 (C), 70.6 (C), 61.2 (CH, q, *J* = 31 Hz), 55.1 (CH), 49.7 (CH), 26.4 (CH<sub>3</sub>); <sup>19</sup>F NMR (376MHz, CDCl<sub>3</sub>) δ -72.76; HRMS (ESI) *m/z*: 529.1345 [M + Na]<sup>+</sup>, calcd for C<sub>28</sub>H<sub>21</sub>F<sub>3</sub>N<sub>2</sub>O<sub>4</sub>Na; Found 529.1375.

**4'-(4-methoxyphenyl)-1''-methyl-5'-(trifluoromethyl)dispiro[indene-2,3'-pyrrolidine-2',3''-indoline]-1,2'',3-trione (4m):**



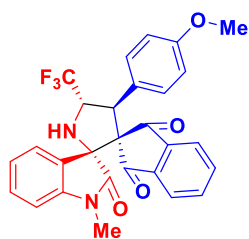

Prepared by following general procedure **D** purified by centrifuge using hexane and isolated product **4m** in 77% yield as a pearl white solid with M. P. 208 - 210 °C.; The enantiomeric excess (ee) was determined by chiral stationary phase HPLC using a Daicel Chiralpak I-A column (hexane/EtOAc = 75:25, flow rate 1 mL/min,  $\lambda = 254$  nm),  $t_R = 10.729$  min (minor),  $t_R = 30.295$  min (major),  $[\alpha]_D^{25} = -8.969$  (CHCl<sub>3</sub>,  $c = 0.11$  g/100ml for 38%ee); IR (neat)  $\nu_{\max}$  2360, 1701, 1514,

1269, 1114 and 759 cm<sup>-1</sup>; <sup>1</sup>H NMR (400 MHz, CDCl<sub>3</sub>)  $\delta$  7.71 - 7.52 (4H, d, m), 7.18 - 7.10 (4H, m), 6.81 (1H, t,  $J = 7.6$  Hz), 6.63 - 6.58 (3H, m), 5.41 (1H, d,  $J = 10.7$  Hz), 5.24 - 5.13 (1H, m), 3.64 (3H, m), 3.15 (3H, s), 3.14 (1H, s); <sup>13</sup>C NMR (100 MHz, CDCl<sub>3</sub>, DEPT-135)  $\delta$  199.0 (C, C=O), 195.7 (C, C=O), 175.4 (C, N-C=O), 159.0 (C), 144.3 (C), 142.4 (C), 141.7 (C), 135.9 (CH), 130.5 (CH), 129.8 (CH), 125.8 (CF<sub>3</sub>, q,  $J = 278$  Hz), 124.7 (CH), 124.4 (C), 123.6 (C), 123.0 (CH), 122.8 (CH), 122.2 (CH), 113.8 (3CH), 108.3 (CH), 70.9 (C), 70.6 (C), 61.3 (CH, q,  $J = 30$  Hz), 55.0 (CH), 49.0 (CH), 26.4 (CH<sub>3</sub>); <sup>19</sup>F NMR (376MHz, CDCl<sub>3</sub>)  $\delta$  -72.73; HRMS (ESI)  $m/z$ : 529.1345 [M + Na]<sup>+</sup>, calcd for C<sub>28</sub>H<sub>21</sub>F<sub>3</sub>N<sub>2</sub>O<sub>4</sub>Na; Found 529.1344.

#### 4'-(4-(benzyloxy)phenyl)-1''-methyl-5''-(trifluoromethyl)dispiro[indene-2,3'-pyrrolidine-2',3''-indoline]-1,2'',3-trione (**4n**):

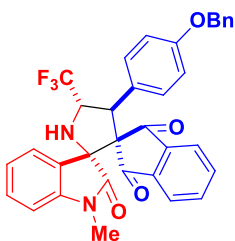

Prepared by following general procedure **C** purified by centrifuge using hexane and isolated product **4n** in 83% yield as a white solid with M. P. 230 °C.; IR (neat)  $\nu_{\max}$  2360, 1703, 1612, 1249, 1116 and 761 cm<sup>-1</sup>; <sup>1</sup>H NMR (400 MHz, CDCl<sub>3</sub>)  $\delta$  7.71 - 7.54 (4H, d, m), 7.34 - 7.27 (5H, m), 7.18 - 7.09 (4H, m), 6.81 (1H, t,  $J = 7.6$  Hz), 6.70 (2H, d,  $J = 8.7$  Hz), 6.59 (1H, d,  $J = 7.8$  Hz), 5.41 (1H, d,  $J = 10.6$  Hz), 5.24 - 5.14 (1H, m), 4.89 - 4.83 (2H, m), 3.17 (1H, s), 3.15 (3H, s); <sup>13</sup>C NMR (100

MHz, CDCl<sub>3</sub>, DEPT-135)  $\delta$  199.0 (C, C=O), 195.7 (C, C=O), 175.4 (C, N-C=O), 158.3 (C), 144.3 (C), 142.4 (C), 141.7 (C), 136.6 (C), 135.8 (C), 130.5 (CH), 129.9 (2CH), 128.5 (3CH), 127.9 (CH), 127.5 (2CH), 125.8 (CF<sub>3</sub>, q,  $J = 279$  Hz), 124.7 (CH), 124.7 (C), 123.6 (C), 123.1 (CH), 122.8 (CH), 122.3 (CH), 114.7 (2CH), 108.3 (CH), 70.9 (C), 70.6 (C), 69.8 (CH<sub>2</sub>), 61.3 (CH, q,  $J = 30$  Hz), 49.7 (CH), 26.4 (CH<sub>3</sub>); <sup>19</sup>F NMR (376MHz, CDCl<sub>3</sub>)  $\delta$  -72.71; HRMS (ESI)  $m/z$ : 605.1658 [M + Na]<sup>+</sup>, calcd for C<sub>34</sub>H<sub>25</sub>F<sub>3</sub>N<sub>2</sub>O<sub>4</sub>Na; Found 605.1670.

#### 4'-(4-(dimethylamino)phenyl)-1''-methyl-5''-(trifluoromethyl)dispiro[indene-2,3'-pyrrolidine-2',3''-indoline]-1,2'',3-trione (**4o**):

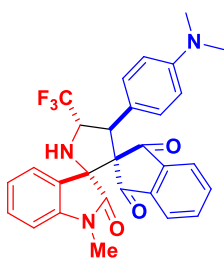

Prepared by following general procedure **C** purified by centrifuge using hexane and isolated product **4o** in 54% yield as a pale yellow solid with M. P. 230 - 235 °C.; IR (neat)  $\nu_{\max}$  2927, 1701, 1614, 1263, 1118, 765 cm<sup>-1</sup>; <sup>1</sup>H NMR (400 MHz, CDCl<sub>3</sub>)  $\delta$  7.71 - 7.52 (4H, d, m), 7.18 (1H, d,  $J = 7.7$  Hz), 7.12 - 7.05 (3H, m), 6.80 (1H, t,  $J = 7.6$  Hz), 6.58 (1H, d,  $J = 7.8$  Hz), 6.43 (2H, d,  $J = 8.7$  Hz), 5.37 (1H, d,  $J = 10.7$  Hz), 5.20 - 5.18 (1H, m), 3.15 (4H, s), 2.78 (6H, s); <sup>13</sup>C NMR (100 MHz, CDCl<sub>3</sub>, DEPT-

**135)**  $\delta$  199.3 (C, C=O), 195.9 (C, C=O), 175.6 (C, N-C=O), 149.8 (C), 144.3 (C), 142.6 (C), 141.9 (C), 135.7 (2CH), 130.4 (CH), 129.5 (2CH), 125.9 (CF<sub>3</sub>, q,  $J$  = 279 Hz), 124.7 (CH), 123.8 (C), 123.0 (CH), 122.8 (CH), 122.2 (CH), 119.6 (C), 112.2 (2CH), 108.2 (CH), 71.0 (C), 70.6 (C), 61.3 (CH, q,  $J$  = 30 Hz), 49.2 (CH), 40.2 (2CH<sub>3</sub>), 26.4 (CH<sub>3</sub>); **<sup>19</sup>F NMR (376MHz, CDCl<sub>3</sub>)**  $\delta$  -72.67; HRMS (ESI)  $m/z$ : 542.1662 [M + Na]<sup>+</sup>, calcd for C<sub>29</sub>H<sub>24</sub>F<sub>3</sub>N<sub>3</sub>O<sub>3</sub>Na; Found 542.1670.

**1''-methyl-4'-(2-nitrophenyl)-5'-(trifluoromethyl)dispiro[indene-2,3'-pyrrolidine-2',3''-indoline]-1,2'',3-trione (4p):**

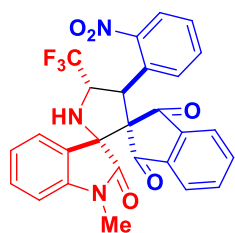

Prepared by following general procedure **C** purified by centrifuge using hexane and isolated product **4p** in 94% yield as a light brown solid with M. P. 225-230 °C.; IR (neat)  $\nu_{\max}$  1734, 1697, 1527, 1350, 1132, 1116 and 754 cm<sup>-1</sup>; **<sup>1</sup>H NMR (400 MHz, CDCl<sub>3</sub>)**  $\delta$  7.73 - .7.71 (1H, d, m), 7.64 – 7.56 (3H, m), 7.51 (1H, d,  $J$  = 7.8 Hz), 7.34 (1H, t,  $J$  = 7.6 Hz), 7.24 – 7.10 (3H, m), 6.80 (1H, t,  $J$  = 7.6 Hz), 6.58 (1H, d,  $J$  = 7.8 Hz), 6.37 (1H, d,  $J$  = 10.6 Hz), 5.21 – 5.17 (1H, m), 3.18 (1H, s), 3.14 (3H, s); **<sup>13</sup>C**

**NMR (100 MHz, CDCl<sub>3</sub>, DEPT-135)**  $\delta$  198.8 (C, C=O), 193.9 (C, C=O), 174.6 (C, N-C=O), 151.4 (C), 144.6 (C), 142.1 (C), 141.4 (C), 136.3 (CH), 135.9 (CH), 131.8 (CH), 130.8 (CH), 129.6 (CH), 128.9 (CH), 126.6 (C), 125.4 (CF<sub>3</sub>, q,  $J$  = 279 Hz), 124.9 (CH), 124.7 (CH), 123.5 (CH), 122.9 (C), 122.8 (CH), 122.1 (CH), 108.4 (CH), 71.0 (C), 70.7 (C), 62.1 (CH, q,  $J$  = 31 Hz), 41.8 (CH), 26.5 (CH<sub>3</sub>); **<sup>19</sup>F NMR (376MHz, CDCl<sub>3</sub>)**  $\delta$  -72.82; HRMS (ESI)  $m/z$ : 544.1090 [M + Na]<sup>+</sup>, calcd for C<sub>27</sub>H<sub>18</sub>F<sub>3</sub>N<sub>3</sub>O<sub>5</sub>Na; Found 544.1090.

**1''-methyl-4'-(4-nitrophenyl)-5'-(trifluoromethyl)dispiro[indene-2,3'-pyrrolidine-2',3''-indoline]-1,2'',3-trione (4q):**

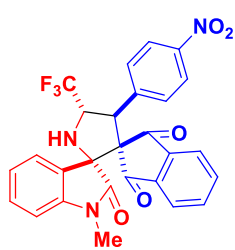

Prepared by following general procedure **C** purified by centrifuge using hexane and isolated product **4q** in 65% yield as a white solid with M. P. 244 - 248 °C.; IR (neat)  $\nu_{\max}$  2360, 1703, 1612, 1346, 1118 and 758 cm<sup>-1</sup>; **<sup>1</sup>H NMR (400 MHz, CDCl<sub>3</sub>)**  $\delta$  7.99 (1H, d,  $J$  = 8.8 Hz), 7.72 (1H, d,  $J$  = 7.9 Hz), 7.67 - 7.58 (3H, m), 7.44 (2H, d,  $J$  = 8.8 Hz), 7.16 – 7.11 (2H, m), 6.82 (1H, t,  $J$  = 7.7 Hz), 6.60 (1H, d,  $J$  = 7.8 Hz), 5.56 (1H, d,  $J$  = 10.6 Hz), 5.36 - 5.26 (1H, m), 3.19 (1H, d,  $J$  = 9.3 Hz),

3.15 (3H, s); **<sup>13</sup>C NMR (100 MHz, CDCl<sub>3</sub>, DEPT-135)**  $\delta$  198.2 (C, C=O), 194.7 (C, C=O), 174.9 (C, N-C=O), 147.5 (C), 144.2 (C), 142.1 (C), 141.5 (C), 140.4 (C), 136.4 (CH), 136.4 (C), 130.9 (CH), 129.9 (2CH), 125.5 (CF<sub>3</sub>, q,  $J$  = 279 Hz), 124.5 (CH), 123.7 (2CH), 123.3 (CH), 123.0 (CH), 122.8 (C), 122.4 (CH), 108.5 (CH), 71.1 (C), 70.7 (C), 61.2 (CH, q,  $J$  = 31 Hz), 48.5 (CH), 26.4 (CH<sub>3</sub>); **<sup>19</sup>F NMR (376MHz, CDCl<sub>3</sub>)**  $\delta$  -72.96; HRMS (ESI)  $m/z$ : 544.1090 [M + Na]<sup>+</sup>, calcd for C<sub>27</sub>H<sub>18</sub>F<sub>3</sub>N<sub>3</sub>O<sub>5</sub>Na; Found 544.1083.

**2-(1''-methyl-1,2'',3-trioxo-5'-(trifluoromethyl)-1,3-dihydrodispiro[indene-2,3'-pyrrolidine-2',3''-indolin]-4'-yl)benzonitrile (4r):**

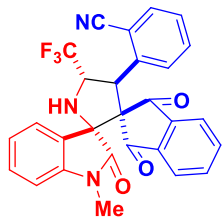

Prepared by following general procedure **C** purified by centrifuge using hexane and isolated product **4p** in 82% yield as a pale yellow solid with M. P. 265 - 270 °C.; IR (neat)  $\nu_{\max}$  1737, 1699, 1494, 1253, 1136 and 761  $\text{cm}^{-1}$ ;  $^1\text{H NMR}$  (400 MHz,  $\text{CDCl}_3$ )  $\delta$  7.78 (1H, d,  $J = 6.9$  Hz), 7.67 – 7.48 (5H, m), 7.37 (1H, t,  $J = 7.4$  Hz), 7.21 – 7.11 (3H, m), 6.80 (1H, t,  $J = 7.5$  Hz), 6.59 (1H, d,  $J = 7.7$  Hz), 6.15 (1H, br s), 5.16 (1H, br s), 3.2 – 3.19 (4H, m);  $^{13}\text{C NMR}$  (100 MHz,  $\text{DMSO}-d_6$ , DEPT-135)  $\delta$  198.9 (C, C=O), 193.5 (C, C=O), 174.6 (C, N-C=O), 144.6 (C), 142.3 (2C), 141.6 (2C), 136.6 (C), 136.3 (CH), 136.0 (CH), 134.0 (CH), 132.5 (CH), 130.8 (CH), 128.6 (CH), 125.5 ( $\text{CF}_3$ , q,  $J = 279$  Hz), 124.7 (CH), 123.5 (CH), 122.9 (CH), 122.8 (CN), 122.1 (CH), 108.4 (2CH), 70.8 (C), 70.6 (C), 62.9 (CH, q,  $J = 32$  Hz), 46.6 (CH), 26.6 ( $\text{CH}_3$ );  $^{19}\text{F NMR}$  (376MHz,  $\text{CDCl}_3$ )  $\delta$  -72.83; HRMS (ESI)  $m/z$ : 524.1192  $[\text{M} + \text{Na}]^+$ , calcd for  $\text{C}_{28}\text{H}_{18}\text{F}_3\text{N}_3\text{O}_3\text{Na}$ ; Found 524.1183.

**4-(1''-methyl-1,2'',3-trioxo-5'-(trifluoromethyl)-1,3-dihydrodispiro[indene-2,3'-pyrrolidine-2',3''-indolin]-4'-yl)benzonitrile (4s):**

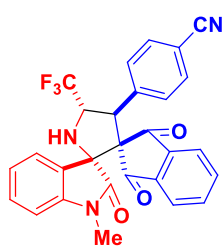

Prepared by following general procedure **C** purified by centrifuge using hexane and isolated product **4s** in 73% yield as a white solid with M. P. 235 – 240 °C.; IR (neat)  $\nu_{\max}$  2233, 1699, 1352, 1261, 1118 and 731  $\text{cm}^{-1}$ ;  $^1\text{H NMR}$  (400 MHz,  $\text{CDCl}_3$ )  $\delta$  7.71 – 7.58 (4H, d, m), 7.43 – 7.35 (4H, m), 7.15 - 7.10 (2H, m), 7.87 (2H, t,  $J = 7.6$  Hz), 6.59 (1H, d,  $J = 7.8$  Hz), 5.50 (1H, d,  $J = 10.6$  Hz), 5.29 - 5.26 (1H, m), 3.19 (1H, d,  $J = 8.9$  Hz), 3.14 (3H, s);  $^{13}\text{C NMR}$  (100 MHz,  $\text{CDCl}_3$ , DEPT-135)  $\delta$  198.2 (C, C=O), 194.8 (C, C=O), 174.9 (C, N-C=O), 144.2 (C), 142.1 (C), 141.5 (C), 138.4 (C), 136.4 (CH), 136.3 (2CH), 130.9 (CH), 129.7 (2CH), 125.5 ( $\text{CF}_3$ , q,  $J = 279$  Hz), 124.6 (CH), 123.3 (CH), 123.0 (CH), 122.9 (C), 122.4 (CH), 118.2 (C), 112.0 (C), 108.5 (CH), 70.9 (C), 70.7 (C), 61.3 (CH, q,  $J = 31$  Hz), 48.9 (CH), 26.4 ( $\text{CH}_3$ );  $^{19}\text{F NMR}$  (376MHz,  $\text{CDCl}_3$ )  $\delta$  -72.95; HRMS (ESI)  $m/z$ : 524.1192  $[\text{M} + \text{Na}]^+$ , calcd for  $\text{C}_{28}\text{H}_{18}\text{F}_3\text{N}_3\text{O}_3\text{Na}$ ; Found 524.1216.

**N-(4-(1''-methyl-1,2'',3-trioxo-5'-(trifluoromethyl)-1,3-dihydrodispiro[indene-2,3'-pyrrolidine-2',3''-indolin]-4'-yl)phenyl)acetamide (4t):**

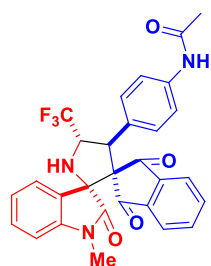

Prepared by following general procedure **C** purified by centrifuge using hexane and isolated product **4t** in 74% yield as a white solid with M. P. 213 – 215 °C.; IR (neat)  $\nu_{\max}$  2360, 1705, 1610, 1261, 1120 and 754  $\text{cm}^{-1}$ ;  $^1\text{H NMR}$  (400 MHz,  $\text{CDCl}_3$ )  $\delta$  7.71 – 7.57 (4H, d, m), 7.24 – 7.09 (6H, m), 7.00 (1H, br, s), 6.80 (1H, t,  $J = 7.4$  Hz), 6.58 (1H, d,  $J = 7.3$  Hz), 5.41 (1H, d,  $J = 10.2$  Hz), 5.22 - 5.20 (1H, m), 3.14 (4H, s), 2.07 (3H, s);  $^{13}\text{C NMR}$  (100 MHz,  $\text{CDCl}_3 + \text{DMSO}-d_6$  (2drops), DEPT-135)  $\delta$  198.1 (C, C=O), 195.4 (C, C=O), 175.3 (C, N-C=O), 168.8 (C, N-C=O), 143.7 (C), 142.0 (C), 142.0 (C), 141.6 (C), 138.7 (C), 136.0 (CH), 135.9 (CH), 130.4 (CH), 129.0 (2CH), 127.2 (C), 125.9 ( $\text{CF}_3$ , q,  $J = 279$  Hz), 125.0

(CH), 123.1 (C), 122.8 (CH), 122.8 (CH), 122.0 (CH), 119.2 (2CH), 108.1 (CH), 71.1 (C), 70.7 (C), 61.1 (CH, q,  $J = 30$  Hz), 48.5 (CH), 26.2 (CH<sub>3</sub>), 24.1 (CH<sub>3</sub>); **<sup>19</sup>F NMR (376MHz, CDCl<sub>3</sub>)**  $\delta$  -72.75; HRMS (ESI)  $m/z$ : 556.1454 [M + Na]<sup>+</sup>, calcd for C<sub>29</sub>H<sub>22</sub>F<sub>3</sub>N<sub>3</sub>O<sub>4</sub>Na; Found 556.1454.

**1''-methyl-4'-(naphthalen-1-yl)-5'-(trifluoromethyl)dispiro[indene-2,3'-pyrrolidine-2',3''-indoline]-1,2'',3-trione (4u):**

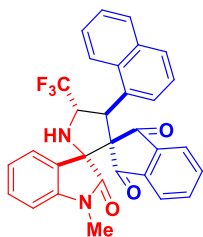

Prepared by following general procedure **C** purified by centrifuge using hexane and isolated product **4u** in 79% yield as a pale yellow solid with M. P. 258 - 262 °C.; IR (neat)  $\nu_{\max}$  2360, 1703, 1612, 1263, 1120 and 758 cm<sup>-1</sup>; **<sup>1</sup>H NMR (400 MHz, CDCl<sub>3</sub>)**  $\delta$  8.36 (1H, d,  $J = 8.7$  Hz), 7.65 (1H, d,  $J = 7.7$  Hz), 7.61 (1H, d,  $J = 8.1$  Hz), 7.56 – 7.51 (3H, m), 7.47 (1H, t,  $J = 6.4$  Hz), 7.40 – 7.33 (2H, m), 7.29 – 7.22 (3H, m), 7.15 (1H, t,  $J = 7.7$  Hz), 6.83 (1H, t,  $J = 7.6$  Hz), 6.71 (1H, d,  $J = 10.5$  Hz), 6.65 (1H, d,  $J = 7.8$  Hz), 5.39 - 5.29 (1H, m), 3.30 (1H, d,  $J = 9.1$  Hz), 3.25 (3H, s); **<sup>13</sup>C NMR (100 MHz, CDCl<sub>3</sub>, DEPT-135)**  $\delta$  199.2 (C, C=O), 195.6 (C, C=O), 175.8 (C, N-C=O), 144.6 (C), 142.2 (C), 141.5 (C), 135.6 (CH), 135.6 (CH), 133.8 (C), 132.0 (C), 130.6 (CH), 128.5 (CH), 128.5 (CH), 128.4 (CH), 126.8 (CH), 125.8 (CH), 125.8 (CF<sub>3</sub>, q,  $J = 278$  Hz), 125.7 (CH), 125.1 (CH), 124.5 (CH), 123.8 (CH), 123.7 (C), 122.8 (CH), 122.6 (CH), 122.3 (CH), 108.4 (CH), 71.0 (C), 70.3 (C), 62.3 (CH, q,  $J = 30$  Hz), 43.6 (CH), 26.5 (CH<sub>3</sub>); **<sup>19</sup>F NMR (376MHz, CDCl<sub>3</sub>)**  $\delta$  -72.74; HRMS (ESI)  $m/z$ : 549.1396 [M + Na]<sup>+</sup>, calcd for C<sub>31</sub>H<sub>21</sub>F<sub>3</sub>N<sub>2</sub>O<sub>3</sub>Na; Found 549.1413.

**(E)-1''-methyl-4'-styryl-5'-(trifluoromethyl)dispiro[indene-2,3'-pyrrolidine-2',3''-indoline]-1,2'',3-trione (4v):**

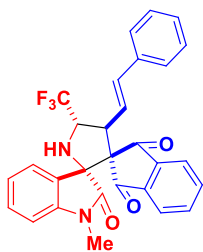

Prepared by following general procedure **C** purified by centrifuge using hexane and isolated product **4v** in 56% yield as a yellowish white solid with M. P. 230 - 234 °C.; IR (neat)  $\nu_{\max}$  2360, 1703, 1612, 1263, 1120 and 758 cm<sup>-1</sup>; **<sup>1</sup>H NMR (400 MHz, CDCl<sub>3</sub>)**  $\delta$  7.87 (1H, d,  $J = 7.52$  Hz), 7.73 – 7.62 (3H, m), 7.20 – 7.09 (7H, m), 6.80 (1H, t,  $J = 7.6$  Hz), 6.62 – 6.57 (2H, m), 5.91 (1H, dd,  $J = 9.6, 9.6$  Hz), 4.91 (1H, t,  $J = 9.6$  Hz), 4.78 -4.70 (1H, m), 3.13 (3H, s), 3.06 (1H, d,  $J = 8.8$  Hz); **<sup>13</sup>C NMR (100 MHz, CDCl<sub>3</sub>, DEPT-135)**  $\delta$  199.2 (C, C=O), 195.0 (C, C=O), 175.2 (C, N-C=O), 144.2 (C), 142.6 (C), 141.7 (C), 136.3 (CH), 136.2 (CH), 136.1 (CH), 135.9 (C), 130.6 (CH), 128.4 (2CH), 127.9 (CH), 126.5 (2CH), 125.7 (CF<sub>3</sub>, q,  $J = 278$  Hz), 124.4 (CH), 123.4 (CH), 123.3 (C), 122.9 (CH), 122.2 (CH), 121.3 (CH), 108.3 (CH), 70.9 (C), 70.1 (C), 63.2 (CH, q,  $J = 30$  Hz), 48.2 (CH), 26.3 (CH<sub>3</sub>); **<sup>19</sup>F NMR (376MHz, CDCl<sub>3</sub>)**  $\delta$  -72.61; HRMS (ESI)  $m/z$ : 525.1396 [M + Na]<sup>+</sup>, calcd for C<sub>29</sub>H<sub>21</sub>F<sub>3</sub>N<sub>2</sub>O<sub>3</sub>Na; Found 525.1412.

**4'-(3,4-dimethoxyphenyl)-1''-methyl-5'-(trifluoromethyl)dispiro[indene-2,3'-pyrrolidine-2',3''-indoline]-1,2'',3-trione (4w):**

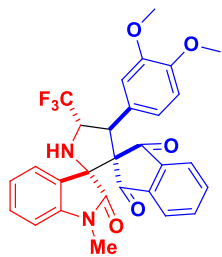

Prepared by following general procedure **C** purified by centrifuge using hexane and isolated product **4w** in 74% yield as a white solid with M. P. 222 - 224 °C.; IR (neat)  $\nu_{\max}$  2360, 1703, 1261, 1026 and 761  $\text{cm}^{-1}$ ;  $^1\text{H NMR}$  (400 MHz,  $\text{CDCl}_3$ )  $\delta$  7.73 - 7.69 (1H, m), 7.64 - 7.55 (3H, m), 7.17 (1H, d,  $J = 7.6$  Hz), 7.12 (1H, t,  $J = 7.7$  Hz), 6.83 - 6.87 (2H, m), 6.68 (1H, s), 6.60 (2H, d,  $J = 8.2$  Hz), 5.41 (1H, d,  $J = 10.6$  Hz), 5.23 - 5.13 (1H, m), 3.74 (3H, s), 3.71 (3H, s), 3.16 (3H, s), 3.15 (1H, d,  $J = 8.9$  Hz);  $^{13}\text{C}$

**NMR** (100 MHz,  $\text{CDCl}_3$ , DEPT-135)  $\delta$  199.1 (C, C=O), 195.8 (C, C=O), 175.5 (C, N-C=O), 148.4 (2C), 144.3 (C), 142.5 (C), 141.8 (C), 136.0 (2CH), 135.9 (CH), 130.6 (CH), 125.8 ( $\text{CF}_3$ , q,  $J = 279$  Hz), 124.8 (CH), 124.6 (C), 123.0 (CH), 122.3 (CH), 120.8 (CH), 111.9 (CH), 110.8 (CH), 108.3 (CH), 70.9 (C), 70.5 (C), 61.3 (CH, q,  $J = 31$  Hz), 55.8 ( $\text{CH}_3$ ), 55.6 ( $\text{CH}_3$ ), 49.6 (CH), 26.4 ( $\text{CH}_3$ );  $^{19}\text{F NMR}$  (376MHz,  $\text{CDCl}_3$ )  $\delta$  -72.74; HRMS (ESI)  $m/z$ : 559.1451  $[\text{M} + \text{Na}]^+$ , calcd for  $\text{C}_{29}\text{H}_{23}\text{F}_3\text{N}_2\text{O}_5\text{Na}$ ; Found 559.1451.

**1''-methyl-5'-(trifluoromethyl)-4'-(2,3,4-trimethoxyphenyl)dispiro[indene-2,3'-pyrrolidine-2',3''-indoline]-1,2'',3-trione (4x):**

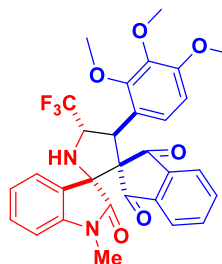

Prepared by following general procedure **C** purified by centrifuge using hexane and isolated product **4x** in 60% yield as a white solid with M. P. 228 - 232 °C.; IR (neat)  $\nu_{\max}$  1741, 1693, 1494, 1153, 1006 and 858  $\text{cm}^{-1}$ ;  $^1\text{H NMR}$  (400 MHz,  $\text{CDCl}_3$ )  $\delta$  7.67 - 7.64 (2H, m), 7.58 - 7.55 (2H, m), 7.22 (1H, d,  $J = 7.2$  Hz), 7.15 (1H, t,  $J = 7.7$  Hz), 6.92 (1H, d,  $J = 8.9$  Hz), 6.81 (1H, t,  $J = 7.6$  Hz), 6.64 (1H, d,  $J = 7.8$  Hz), 6.44 (1H, d,  $J = 8.8$  Hz), 5.90 (1H, d,  $J = 10.6$  Hz), 5.10 - 4.97 (1H, m), 3.81 (3H, s),

3.70 (3H, s), 3.50 (3H, s), 3.23 (3H, s), 3.17 (1H, d,  $J = 9.7$  Hz);  $^{13}\text{C NMR}$  (100 MHz,  $\text{CDCl}_3$ , DEPT-135)  $\delta$  199.5 (C, C=O), 194.7 (C, C=O), 175.7 (C, N-C=O), 153.0 (C), 152.3 (C), 144.8 (C), 142.9 (C), 141.7 (C), 141.3 (C), 135.7 (CH), 135.3 (CH), 130.4 (CH), 125.9 ( $\text{CF}_3$ , q,  $J = 278$  Hz), 125.1 (CH), 124.0 (C), 122.9 (2C), 122.5 (CH), 122.1 (CH), 118.4 (C), 108.2 (CH), 106.5 (CH), 70.9 (C), 69.7 (C), 61.4 (CH, q,  $J = 30$  Hz), 60.8 ( $\text{CH}_3$ ), 60.4 ( $\text{CH}_3$ ), 55.7 ( $\text{CH}_3$ ), 43.5 (CH), 26.4 ( $\text{CH}_3$ );  $^{19}\text{F NMR}$  (376MHz,  $\text{CDCl}_3$ )  $\delta$  -72.20; HRMS (ESI)  $m/z$ : 589.1556  $[\text{M} + \text{Na}]^+$ , calcd for  $\text{C}_{30}\text{H}_{25}\text{F}_3\text{N}_2\text{O}_6\text{Na}$ ; Found 589.1571.

**4'-(furan-2-yl)-1''-methyl-5'-(trifluoromethyl)dispiro[indene-2,3'-pyrrolidine-2',3''-indoline]-1,2'',3-trione (4y):**

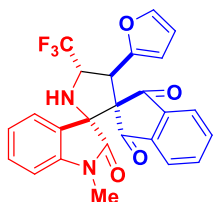

Prepared by following general procedure **C** purified by centrifuge using hexane and isolated product **4y** in 60% yield as a white solid with M. P. 221 - 224 °C.; IR (neat)  $\nu_{\max}$  1753, 1708, 1259, 1126 and 750  $\text{cm}^{-1}$ ;  $^1\text{H NMR}$  (400 MHz,  $\text{CDCl}_3$ )  $\delta$  7.08 (1H, d,  $J = 6.7$  Hz), 7.72 (1H, d,  $J = 7.9$  Hz), 7.68 - 7.62 (2H, m), 7.18 - 7.12 (2H, m), 7.01 (1H, s), 6.82 (1H, t,  $J = 7.6$  Hz), 6.61 (1H, d,  $J = 7.8$  Hz), 6.15 (1H, d,  $J = 3.2$

H<sub>z</sub>), 6.06 – 6.05 (1H, m), 5.53 (1H, d, *J* = 10.3 Hz), 5.11 - 5.05 (1H, m), 3.20 – 3.16 (4H, s); <sup>13</sup>C NMR (100 MHz, CDCl<sub>3</sub>, DEPT-135) δ 198.1 (C, C=O), 194.8 (C, C=O), 175.2 (C, N-C=O), 147.2 (C), 144.4 (C), 142.4 (CH), 142.2 (C), 141.4 (CH), 135.9 (2CH), 130.7 (CH), 125.5 (CF<sub>3</sub>, q, *J* = 278 Hz), 124.8 (CH), 123.2 (CH), 123.1 (C), 122.9 (CH), 122.3 (CH), 110.2 (CH), 109.3 (CH), 108.4 (CH), 70.1 (C), 69.1 (C), 61.5 (CH, q, *J* = 31 Hz), 43.8 (CH), 26.4 (CH<sub>3</sub>); <sup>19</sup>F NMR (376MHz, CDCl<sub>3</sub>) δ -73.01; HRMS (ESI) *m/z*: 489.1032 [M + Na]<sup>+</sup>, calcd for C<sub>25</sub>H<sub>17</sub>F<sub>3</sub>N<sub>2</sub>O<sub>4</sub>Na; Found 489.1039.

**1''-methyl-4'-(thiophen-2-yl)-5'-(trifluoromethyl)dispiro[indene-2,3'-pyrrolidine-2',3''-indoline]-1,2'',3-trione (4z):**

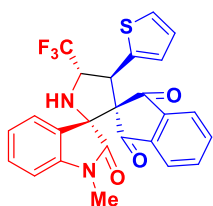

Prepared by following general procedure D purified by centrifuge using hexane and isolated product **4z** in 64% yield as a white solid with M. P. 242 - 245 °C.; The enantiomeric excess (*ee*) was determined by chiral stationary phase HPLC using a Daicel Chiralpak I-A column (hexane/EtOAc = 75:25, flow rate 0.5 mL/min, λ = 254 nm), *t<sub>R</sub>* = 19.104 min (minor), *t<sub>R</sub>* = 51.333 min (major), [*α*]<sub>D</sub><sup>25</sup> = -16.321 (CHCl<sub>3</sub>, *c* = 0.11 g/100ml for 90%*ee*); IR (neat) *ν*<sub>max</sub> 1703, 1618, 1492, 1236, 1120 and 732 cm<sup>-1</sup>; <sup>1</sup>H NMR (400 MHz, CDCl<sub>3</sub>) δ 7.78 (1H, d, *J* = 7.0 Hz), 7.69 – 7.58 (3H, m), 7.17 – 7.11 (2H, m), 6.98 (1H, d, *J* = 5.1 Hz), 6.91 (1H, d, *J* = 3.4 Hz), 6.82 (1H, t, *J* = 7.5 Hz), 6.73 – 6.71 (1H, m), 6.60 (1H, d, *J* = 7.8 Hz), 5.74 (1H, d, *J* = 10.4 Hz), 5.14 - 5.03 (1H, m), 3.17 (1H, d, *J* = 10.6 Hz), 3.15 (3H, s); <sup>13</sup>C NMR (100 MHz, CDCl<sub>3</sub>, DEPT-135) δ 198.9 (C, C=O), 195.0 (C, C=O), 175.2 (C, N-C=O), 144.3(C), 142.5 (CH), 141.9 (C), 135.9 (2CH), 134.9 (CH), 134.7 (CH), 127.7 (CH), 126.6 (CH), 125.5 (CF<sub>3</sub>, q, *J* = 279 Hz), 125.3 (CH), 124.7 (CH), 123.3 (CH), 123.2 (C), 122.9 (CH), 122.3 (C), 108.4 (CH), 70.6 (C), 70.5 (C), 63.4 (CH, q, *J* = 31 Hz), 45.3 (CH), 26.4 (CH<sub>3</sub>); <sup>19</sup>F NMR (376MHz, CDCl<sub>3</sub>) δ -72.74; HRMS (ESI) *m/z*: 505.0804 [M + Na]<sup>+</sup>, calcd for C<sub>25</sub>H<sub>17</sub>F<sub>3</sub>N<sub>2</sub>O<sub>3</sub>SNa; Found 505.0809.

**1'',5''-dimethyl-4'-phenyl-5'-(trifluoromethyl)dispiro[indene-2,3'-pyrrolidine-2',3''-indoline]-1,2'',3-trione (4a'):**

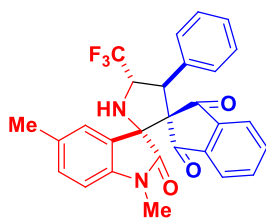

Prepared by following general procedure C purified by centrifuge using hexane and isolated product **4a'** in 89% yield as a white solid with M. P. 260 - 265 °C.; IR (neat) *ν*<sub>max</sub> 1722, 1604, 1352, 1253 and 746 cm<sup>-1</sup>; <sup>1</sup>H NMR (400 MHz, CDCl<sub>3</sub>) δ 7.70 - 7.53 (4H, m), 7.21 (2H, d, *J* = 7.4 Hz), 7.11 – 7.02 (3H, m), 6.99 (1H, s), 6.90 (1H, d, *J* = 7.9 Hz), 6.56 (1H, d, *J* = 7.9 Hz), 5.46 (1H, d, *J* = 10.6 Hz), 5.30 - 5.20 (1H, m), 3.15 (1H, d, *J* = 12.1 Hz), 3.13 (3H, s), 2.16 (3H, s); <sup>13</sup>C NMR (100 MHz, CDCl<sub>3</sub>, DEPT-135) δ 198.8 (C, C=O), 195.5 (C, C=O), 175.4 (C, N-C=O), 142.4 (C), 141.8 (C), 141.8 (C), 135.8 (CH), 132.6 (C), 131.8 (C), 130.8 (CH), 128.8 (2CH), 128.5 (2CH), 127.9 (CH), 125.8 (CF<sub>3</sub>, q, *J* = 278 Hz), 125.6 (CH), 123.5 (C), 123.1 (CH), 122.7 (2CH), 108.0 (CH), 71.0 (C), 70.7 (C),

61.1 (CH, q,  $J = 31$  Hz), 49.6 (CH), 26.4 (CH<sub>3</sub>), 21.0 (CH<sub>3</sub>); **<sup>19</sup>F NMR (376MHz, CDCl<sub>3</sub>)**  $\delta$  -72.73; HRMS (ESI)  $m/z$ : 513.1396 [M + Na]<sup>+</sup>, calcd for C<sub>28</sub>H<sub>21</sub>F<sub>3</sub>N<sub>2</sub>O<sub>3</sub>Na; Found 513.1410.

**5''-methoxy-1''-methyl-4'-phenyl-5'-(trifluoromethyl)dispiro[indene-2,3'-pyrrolidine-2',3''-indoline]-1,2'',3-trione (4b')**:

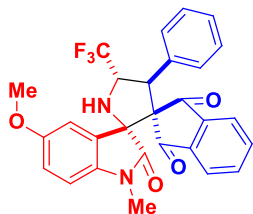

Prepared by following general procedure **C** purified by centrifuge using hexane and isolated product **4b'** in 94% yield as a pale yellow solid with M. P. 240 - 245 °C.; IR (neat)  $\nu_{\max}$  1703, 1496, 1253, 1112 and 696 cm<sup>-1</sup>; **<sup>1</sup>H NMR (400 MHz, CDCl<sub>3</sub>)**  $\delta$  7.71 - 7.54 (4H, m), 7.21 (2H, d,  $J = 7.2$  Hz), 7.10 - 7.01 (3H, m), 6.83 (1H, d,  $J = 2.4$  Hz), 6.64 (1H, dd,  $J = 2.4, 2.4$  Hz), 6.51 (1H, d,  $J = 8.8$  Hz), 5.51 (1H, d,  $J = 10.6$  Hz), 5.28 - 5.25 (1H, m), 3.67 (3H, s), 3.18 (1H, d,  $J = 8.4$  Hz), 3.10 (3H, s); **<sup>13</sup>C NMR (100 MHz, CDCl<sub>3</sub>, DEPT-135)**  $\delta$  198.9 (C, C=O), 195.4 (C, C=O), 175.2 (C, N-C=O), 155.5 (C), 142.4 (C), 141.7 (C), 137.6 (C), 135.9 (CH), 132.5 (C), 128.7 (2CH), 128.5 (2CH), 128.0 (CH), 125.8 (CF<sub>3</sub>, q,  $J = 278$  Hz), 124.7 (C), 123.1 (CH), 122.8 (CH), 115.1 (CH), 112.3 (CH), 108.8 (CH), 71.0 (C), 70.1 (C), 61.1 (CH, q,  $J = 31$  Hz), 55.8 (O-CH<sub>3</sub>), 49.7 (CH), 26.5 (CH<sub>3</sub>); **<sup>19</sup>F NMR (376MHz, CDCl<sub>3</sub>)**  $\delta$  -72.71; HRMS (ESI)  $m/z$ : 529.1345 [M + Na]<sup>+</sup>, calcd for C<sub>28</sub>H<sub>21</sub>F<sub>3</sub>N<sub>2</sub>O<sub>4</sub>Na; Found 529.1336.

**7''-fluoro-1''-methyl-4'-phenyl-5'-(trifluoromethyl)dispiro[indene-2,3'-pyrrolidine-2',3''-indoline]-1,2'',3-trione (4c')**:

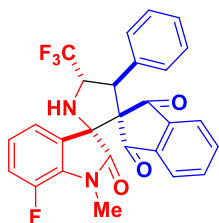

Prepared by following general procedure **C** purified by centrifuge using hexane and isolated product **4c'** in 88% yield as a white solid with M. P. 250 - 255 °C.; IR (neat)  $\nu_{\max}$  1703, 1629, 1244, 1159 and 725 cm<sup>-1</sup>; **<sup>1</sup>H NMR (400 MHz, CDCl<sub>3</sub>)**  $\delta$  7.69 - 7.56 (4H, m), 7.19 (2H, d,  $J = 7.6$  Hz), 7.10 - 6.99 (4H, m), 6.88 - 6.73 (2H, m), 5.43 (1H, d,  $J = 10.6$  Hz), 5.29 - 5.19 (1H, m), 3.39 (3H, d,  $J = 2.8$  Hz), 3.16 (1H, d,  $J = 9.2$  Hz); **<sup>13</sup>C NMR (100 MHz, CDCl<sub>3</sub>, DEPT-135)**  $\delta$  198.6 (C, C=O), 195.3 (C, C=O), 175.2 (C, N-C=O), 147.2 (C, CF, d,  $J = 242$  Hz), 142.3 (C), 141.6 (C), 136.0 (2CH, d,  $J = 8$  Hz), 132.2 (C), 131.1 (C, d,  $J = 9$  Hz), 128.7 (2CH), 128.5 (2CH), 128.1 (CH), 126.5 (C, d,  $J = 3$  Hz), 125.7 (CF<sub>3</sub>, q,  $J = 279$  Hz), 123.0 (2CH, d,  $J = 36$  Hz), 122.8 (CH), 122.7 (CH), 120.8 (CH, d,  $J = 3$  Hz), 118.7 (CH, d,  $J = 19$  Hz), 71.0 (C), 70.5 (C, d,  $J = 3$  Hz), 61.1 (CH, q,  $J = 31$  Hz), 49.7 (CH), 28.9 (CH<sub>3</sub>, d,  $J = 6$  Hz); **<sup>19</sup>F NMR (376MHz, CDCl<sub>3</sub>)**  $\delta$  -72.76, -135.26; HRMS (ESI)  $m/z$ : 517.1145 [M + Na]<sup>+</sup>, calcd for C<sub>27</sub>H<sub>18</sub>F<sub>4</sub>N<sub>2</sub>O<sub>3</sub>Na; Found 517.1159.

**1''-benzyl-4'-phenyl-5'-(trifluoromethyl)dispiro[indene-2,3'-pyrrolidine-2',3''-indoline]-1,2'',3-trione (4d')**:



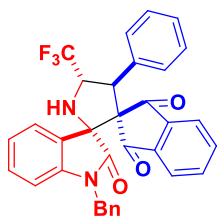

Prepared by following general procedure **C** purified by centrifuge using hexane and isolated product **4d'** in 64% yield as a white solid with M. P. 275 - 280 °C.; IR (neat)  $\nu_{\max}$  1703, 1610, 1456, 1255, 1130 and 758 cm<sup>-1</sup>; **<sup>1</sup>H NMR (400 MHz, CDCl<sub>3</sub>)**  $\delta$  7.68 - 7.52 (4H, m), 7.35 (4H, d,  $J$  = 4.4 Hz), 7.30 - 7.26 (3H, m), 7.18 (1H, d,  $J$  = 7.6 Hz), 7.13 - 7.04 (3H, m), 6.97 (1H, t,  $J$  = 9.4 Hz), 6.77 (1H, t,  $J$  = 7.6 Hz), 6.44 (1H, d,  $J$  = 8 Hz), 5.50 (1H, d,  $J$  = 10.6 Hz), 5.35 - 5.25 (2H, m), 4.41 (1H, d,  $J$  = 15.5 Hz), 3.19 (1H, d,  $J$  = 9.3 Hz); **<sup>13</sup>C NMR (100 MHz, CDCl<sub>3</sub>, DEPT-135)**  $\delta$  198.6 (C, C=O), 195.4 (C, C=O), 175.4 (C, N-C=O), 143.6 (C), 142.4 (C), 141.8 (C), 135.9 (CH), 135.9 (CH), 135.6 (CH), 132.5 (C), 130.5 (CH), 128.9 (2CH), 128.5 (2CH), 128.5 (2CH), 128.0 (CH), 127.7 (2CH), 127.6 (CH), 125.8 (CF<sub>3</sub>, q,  $J$  = 279 Hz), 124.8 (CH), 123.6 (C), 122.9 (CH), 122.9 (CH), 122.3 (CH), 109.4 (CH), 71.0 (C), 70.9 (C), 61.1 (CH, q,  $J$  = 31 Hz), 49.5 (CH), 44.4 (CH<sub>2</sub>); **<sup>19</sup>F NMR (376MHz, CDCl<sub>3</sub>)**  $\delta$  -72.88; HRMS (ESI)  $m/z$ : 575.1553 [M + Na]<sup>+</sup>, calcd for C<sub>33</sub>H<sub>23</sub>F<sub>3</sub>N<sub>2</sub>O<sub>3</sub>Na; Found 575.1555.

**1''-allyl-4'-phenyl-5'-(trifluoromethyl)dispiro[indene-2,3'-pyrrolidine-2',3''-indoline]-1,2'',3-trione (4e')**

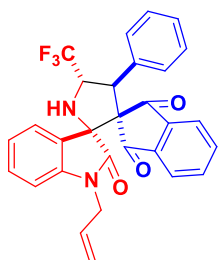

Prepared by following general procedure **C** purified by centrifuge using hexane and isolated product **4e'** in 70% yield as a white solid with M. P. 240 - 245 °C.; IR (neat)  $\nu_{\max}$  1703, 1612, 1359, 1263 and 754 cm<sup>-1</sup>; **<sup>1</sup>H NMR (400 MHz, CDCl<sub>3</sub>)**  $\delta$  7.69 - 7.53 (4H, m), 7.23 - 7.17 (3H, m), 7.11 - 7.02 (4H, m), 6.80 (1H, t,  $J$  = 7.6 Hz), 6.59 (1H, d,  $J$  = 7.6 Hz), 5.87 - 5.77 (1H, m), 5.44 (1H, d,  $J$  = 10.6 Hz), 5.32 - 5.16 (3H, m), 4.16 - 4.56 (1H, m), 4.01 (1H, dd,  $J$  = 6, 5.9 Hz), 3.17 (1H, d,  $J$  = 8.8 Hz); **<sup>13</sup>C NMR (100 MHz, CDCl<sub>3</sub>, DEPT-135)**  $\delta$  198.7 (C, C=O), 195.3 (C, C=O), 175.1 (C, N-C=O), 143.5 (C), 142.4 (C), 141.7 (C), 135.9 (CH), 135.8 (CH), 132.5 (C), 131.3 (CH), 130.4 (CH), 128.8 (CH), 128.5 (2CH), 128.0 (CH), 125.8 (CF<sub>3</sub>, q,  $J$  = 278 Hz), 124.8 (CH), 123.5 (C), 122.9 (CH), 122.8 (CH), 122.2 (CH), 117.8 (CH<sub>2</sub>), 109.2 (CH), 71.1 (C), 70.7 (C), 61.1 (CH, q,  $J$  = 31 Hz), 49.5 (CH), 42.7 (CH<sub>2</sub>); **<sup>19</sup>F NMR (376MHz, CDCl<sub>3</sub>)**  $\delta$  -72.81; HRMS (ESI)  $m/z$ : 525.1396 [M + Na]<sup>+</sup>, calcd for C<sub>29</sub>H<sub>21</sub>F<sub>3</sub>N<sub>2</sub>O<sub>3</sub>Na; Found 525.1410.

**4'-phenyl-1''-(prop-2-yn-1-yl)-5'-(trifluoromethyl)dispiro[indene-2,3'-pyrrolidine-2',3''-indoline]-1,2'',3-trione (4f')**

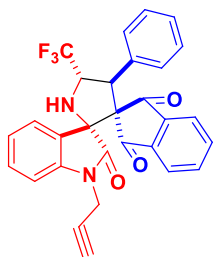

Prepared by following general procedure **C** purified by centrifuge using hexane and isolated product **4f'** in 78% yield as a white solid with M. P. 253 - 257 °C.; IR (neat)  $\nu_{\max}$  1716, 1612, 1357, 1261 and 752 cm<sup>-1</sup>; **<sup>1</sup>H NMR (400 MHz, CDCl<sub>3</sub>)**  $\delta$  7.68 - 7.52 (4H, m), 7.22 - 7.20 (3H, m), 7.16 - 7.02 (4H, m), 6.84 (2H, q,  $J$  = 7.6 Hz), 5.39 (1H, d,  $J$  = 10.6 Hz), 5.32 - 5.22 (1H, m), 4.55 (1H, dd,  $J$  = 2.4, 2.4 Hz), 4.40 (1H, dd,  $J$  = 2.4, 2.4 Hz), 3.19 (1H, d,  $J$  = 9.1 Hz), 2.2 (1H, t,  $J$  = 2.4 Hz); **<sup>13</sup>C NMR**



(100 MHz, CDCl<sub>3</sub>, DEPT-135) δ 198.6 (C, C=O), 195.1 (C, C=O), 174.3 (C, N-C=O), 142.4 (C), 142.2 (C), 141.7 (C), 135.9 (CH), 135.8 (CH), 132.4 (C), 130.5 (CH), 128.8 (2CH), 128.5 (2CH), 128.0 (CH), 125.7 (CF<sub>3</sub>, q, *J* = 278Hz), 124.9 (CH), 123.4 (C), 123.0 (CH), 122.8 (CH), 122.6 (CH), 109.4 (CH), 76.4 (CH), 72.5 (C), 71.0 (C), 70.7 (C), 61.1 (CH, q, *J* = 31 Hz), 49.5 (CH), 29.4 (CH<sub>2</sub>); <sup>19</sup>F NMR (376MHz, CDCl<sub>3</sub>) δ -72.87; HRMS (ESI) *m/z*: 523.1240 [M + Na]<sup>+</sup>, calcd for C<sub>29</sub>H<sub>19</sub>F<sub>3</sub>N<sub>2</sub>O<sub>3</sub>Na; Found 5223.1245.

**(3R,4'S,5'S)-1-methyl-2-oxo-4'-phenyl-5'-(trifluoromethyl)spiro[indoline-3,2'-pyrrolidine]-3',3'-dicarbonitrile (4aa'')**:

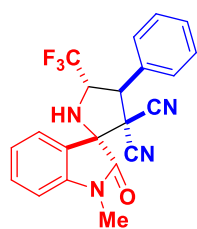

Prepared by following general procedure **C** purified by column chromatography using hexane/EtOAc and isolated product **4aa''** in 58% yield as a white solid with M. P. 187 - 194 °C.; IR (neat)  $\nu_{\max}$  2250, 1701, 1454, 1176, 1138 and 694 cm<sup>-1</sup>; <sup>1</sup>H NMR (400 MHz, CDCl<sub>3</sub>) δ 7.79 (1H, d, *J* = 7.4 Hz), 7.60 – 7.58 (2H, m), 7.50 -7.47 (4H, m), 7.22 (1H, t, *J* = 7.7 Hz), 6.93 (1H, d, *J* = 7.8 Hz), 5.44 (1H, d, *J* = 10.8 Hz), 4.84 – 4.74 (1H, m), 3.27 (3H, s), 2.94 (1H, d, *J* = 7.6 Hz); <sup>13</sup>C NMR (100 MHz, CDCl<sub>3</sub>, DEPT-135) δ 173.3 (C, N-C=O), 144.4 (C), 132.5 (CH), 130.1 (CH), 129.4 (CH), 129.5 (C), 128.9 (CH), 124.9 (CH), 124.5 (CF<sub>3</sub>, q, *J* = 278 Hz), 123.9 (CH), 121.9 (C), 111.2 (2CN), 109.4 (CH), 70.8 (C), 59.9 (CH, q, *J* = 32 Hz), 51.6 (C), 51.4 (CH), 26.7 (CH<sub>3</sub>); <sup>19</sup>F NMR (376MHz, CDCl<sub>3</sub>) δ -73.469; HRMS (ESI) *m/z*: 419.1090 [M + Na]<sup>+</sup>, calcd for C<sub>21</sub>H<sub>15</sub>F<sub>3</sub>N<sub>4</sub>ONa; Found 419.1098.

**Crystal Structure of 4a**

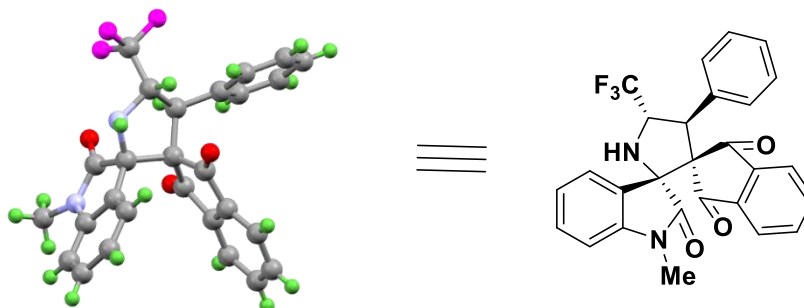

Table 1. Crystal data and structure refinement for me.

|                     |                                                                              |
|---------------------|------------------------------------------------------------------------------|
| Identification code | ME                                                                           |
| Empirical formula   | C <sub>27</sub> H <sub>19</sub> F <sub>3</sub> N <sub>2</sub> O <sub>3</sub> |
| Formula weight      | 476.44                                                                       |
| Temperature         | 296(2) K                                                                     |
| Wavelength          | 0.71073 Å                                                                    |

|                                   |                                                                                                    |
|-----------------------------------|----------------------------------------------------------------------------------------------------|
| Crystal system                    | Orthorhombic                                                                                       |
| Space group                       | Pbca                                                                                               |
| Unit cell dimensions              | a = 12.0771(4) Å      α = 90°.<br>b = 19.0403(7) Å      β = 90°.<br>c = 20.1521(8) Å      γ = 90°. |
| Volume                            | 4634.0(3) Å <sup>3</sup>                                                                           |
| Z                                 | 8                                                                                                  |
| Density (calculated)              | 1.366 Mg/m <sup>3</sup>                                                                            |
| Absorption coefficient            | 0.106 mm <sup>-1</sup>                                                                             |
| F(000)                            | 1968                                                                                               |
| Crystal size                      | 0.200 x 0.150 x 0.100 mm <sup>3</sup>                                                              |
| Theta range for data collection   | 2.139 to 25.672°.                                                                                  |
| Index ranges                      | -14 ≤ h ≤ 14, -22 ≤ k ≤ 23, -24 ≤ l ≤ 24                                                           |
| Reflections collected             | 69301                                                                                              |
| Independent reflections           | 4398 [R(int) = 0.0962]                                                                             |
| Completeness to theta = 25.242°   | 100.0 %                                                                                            |
| Absorption correction             | Semi-empirical from equivalents                                                                    |
| Max. and min. transmission        | 0.7452 and 0.6676                                                                                  |
| Refinement method                 | Full-matrix least-squares on F <sup>2</sup>                                                        |
| Data / restraints / parameters    | 4398 / 0 / 322                                                                                     |
| Goodness-of-fit on F <sup>2</sup> | 1.106                                                                                              |
| Final R indices [I > 2σ(I)]       | R1 = 0.0447, wR2 = 0.0984                                                                          |
| R indices (all data)              | R1 = 0.1227, wR2 = 0.1421                                                                          |
| Extinction coefficient            | 0.0010(2)                                                                                          |
| Largest diff. peak and hole       | 0.253 and -0.188 e.Å <sup>-3</sup>                                                                 |

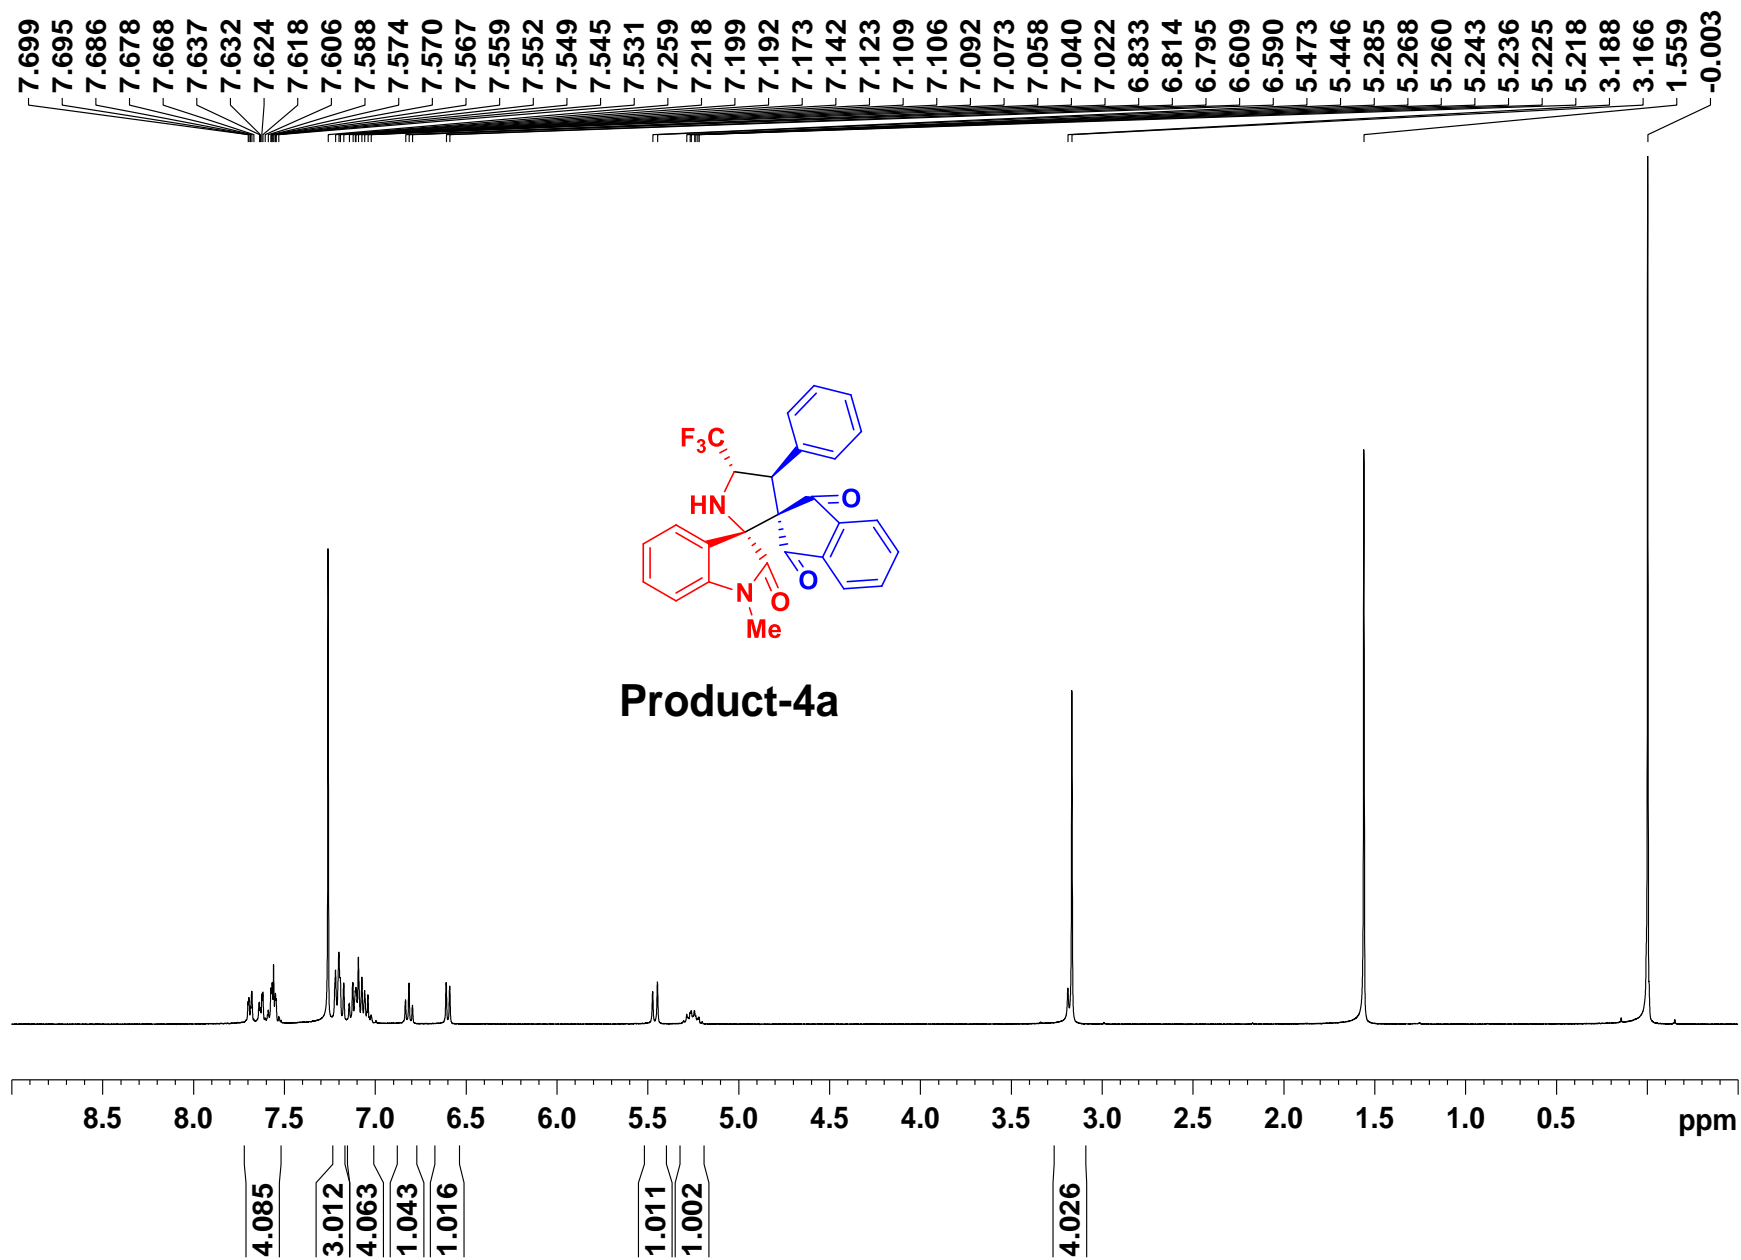

197.62  
195.33

175.18

143.61  
141.74  
141.46  
136.05  
135.91  
132.79  
130.31  
130.16  
128.59  
128.24  
127.74  
127.38  
125.26  
124.60  
122.98  
122.64  
121.89  
121.82  
108.06

78.54

78.21

77.89

71.13

70.80

61.16

60.87

60.56

60.27

48.76

40.09

39.88

39.67

26.04

-0.01

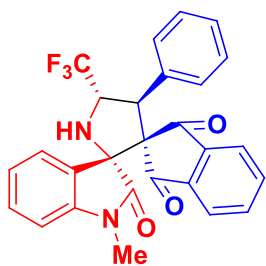

Product-4a

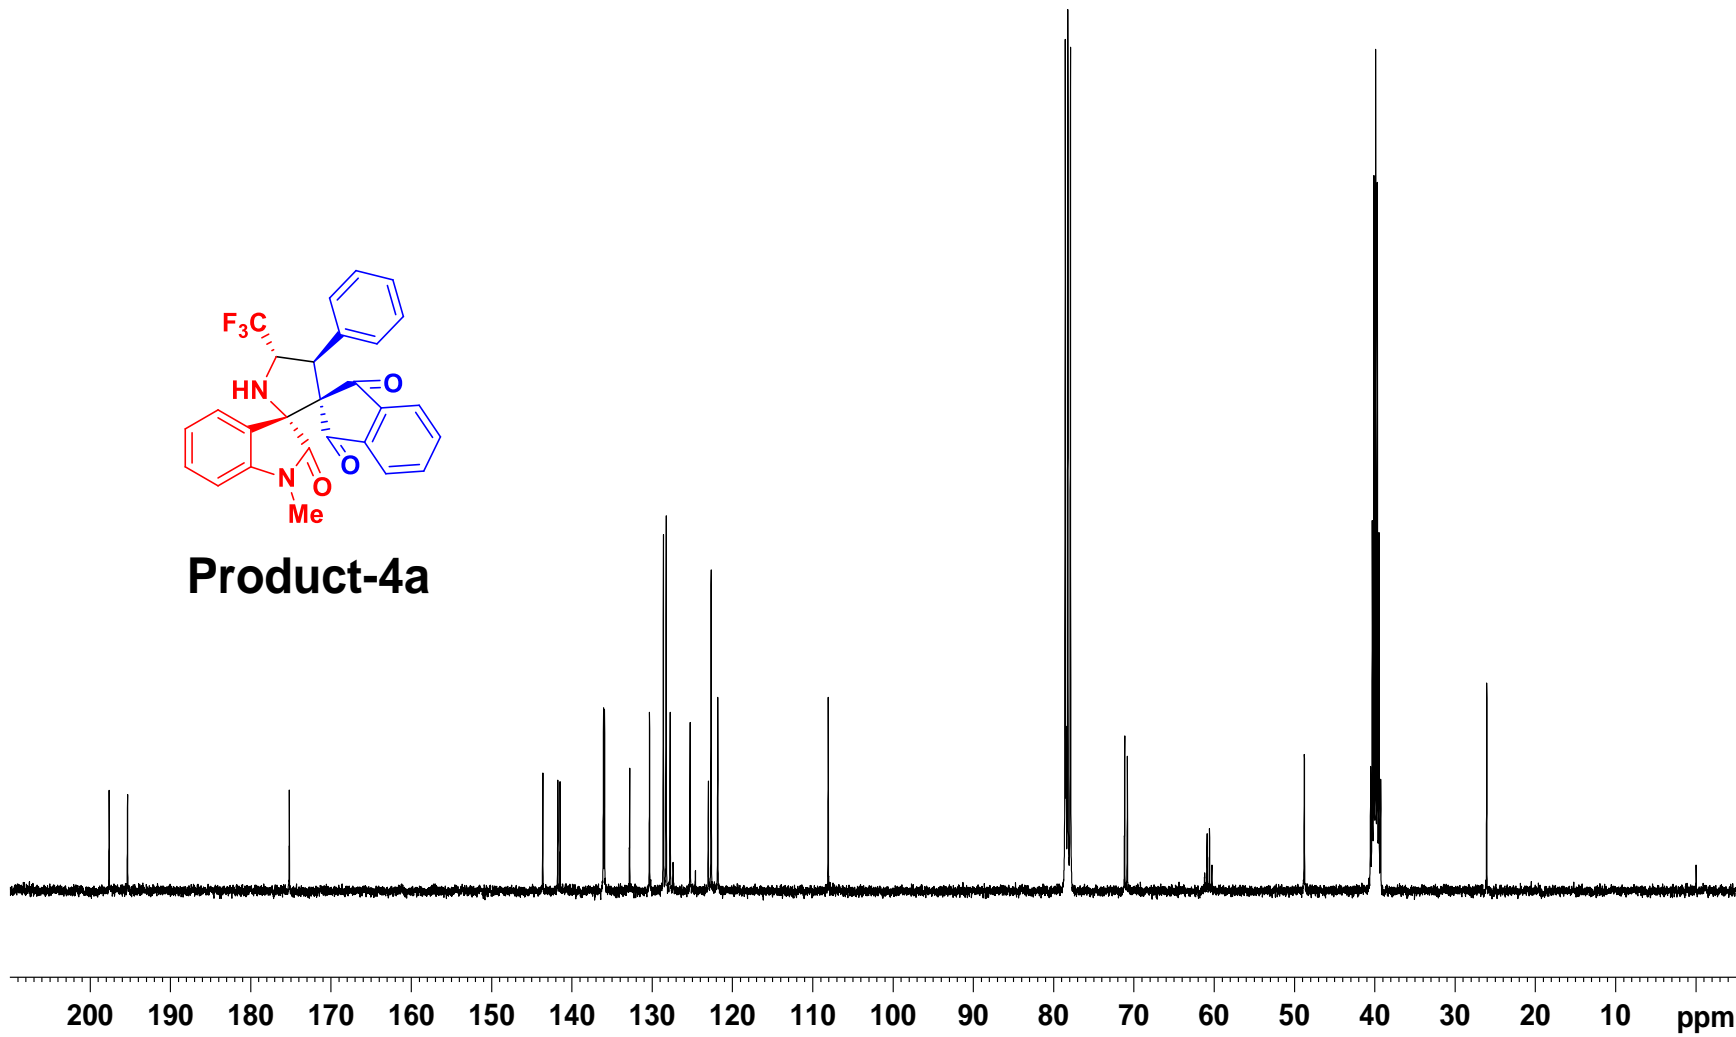

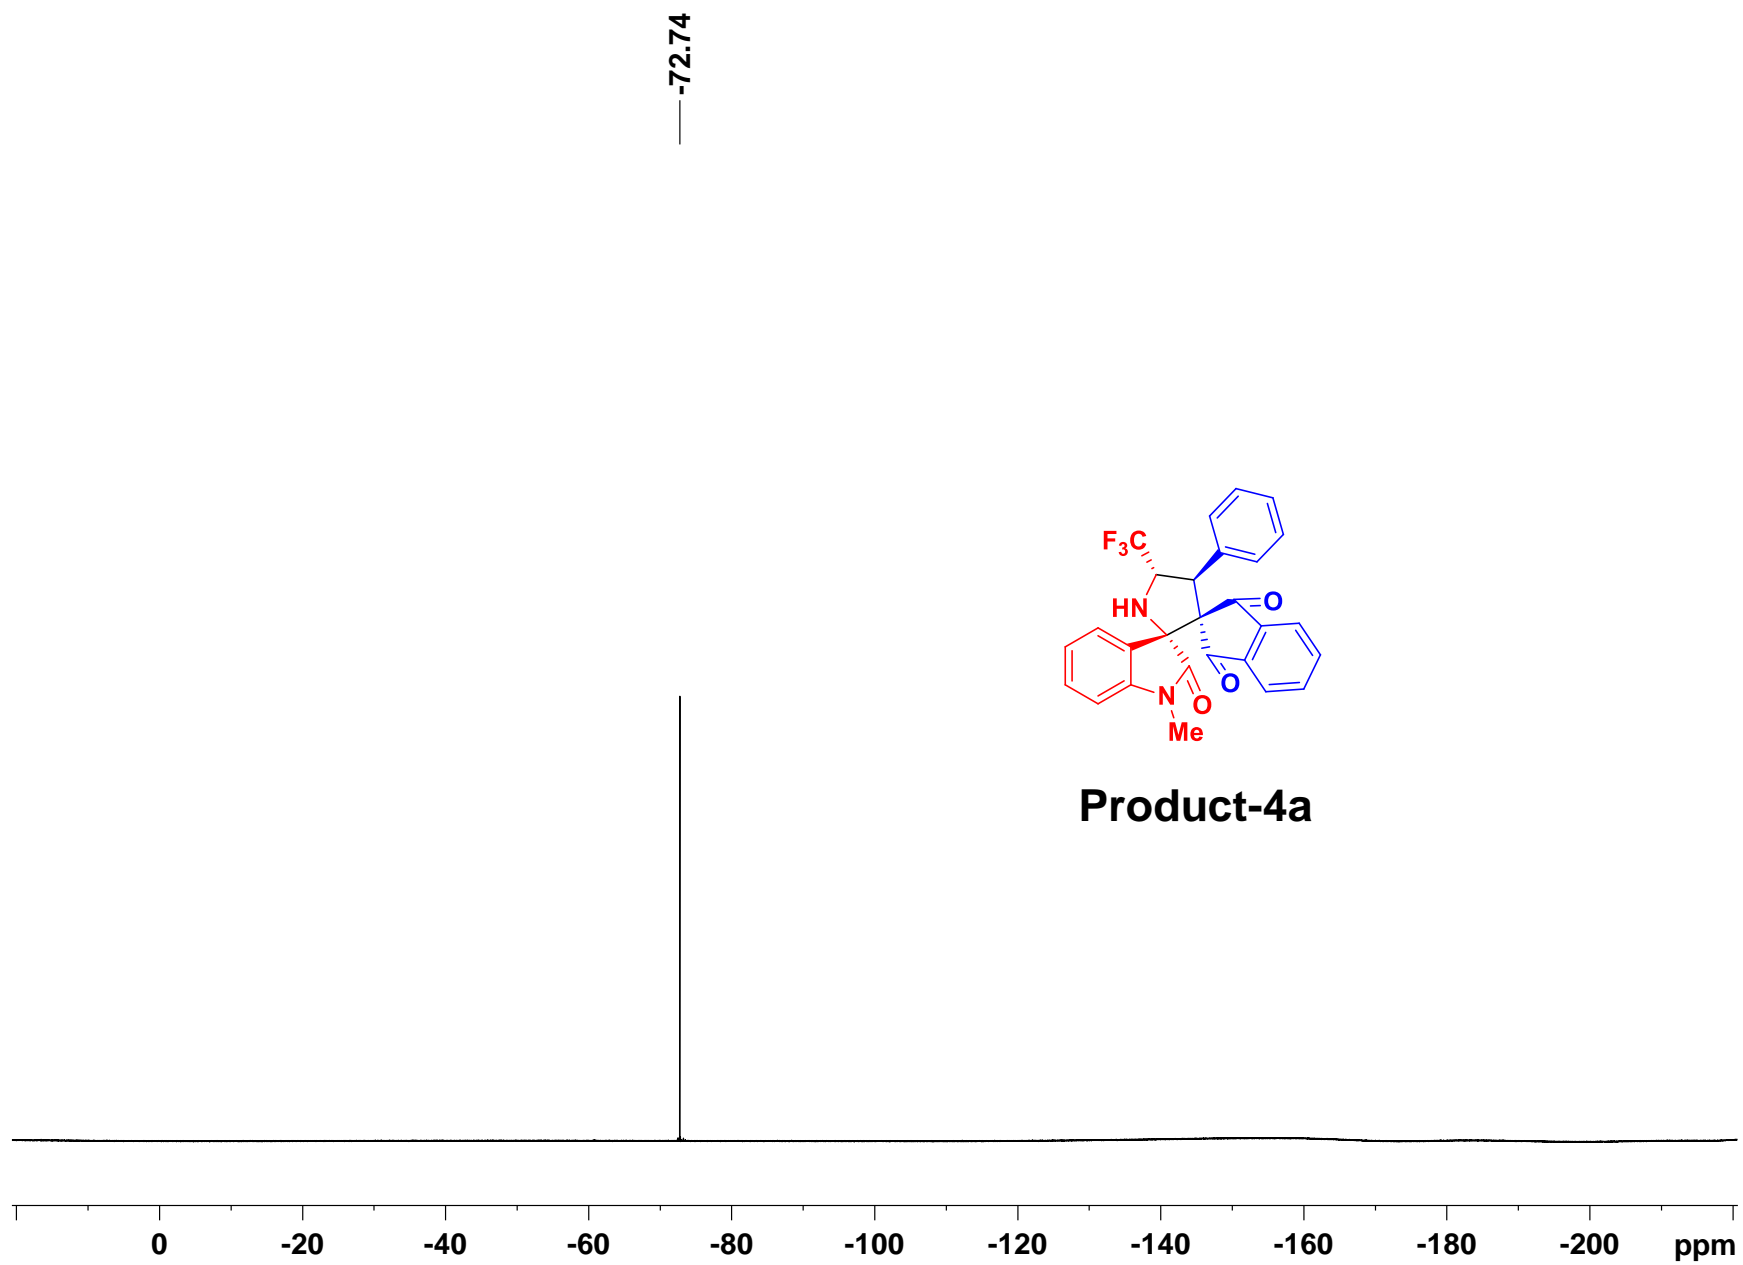

S21

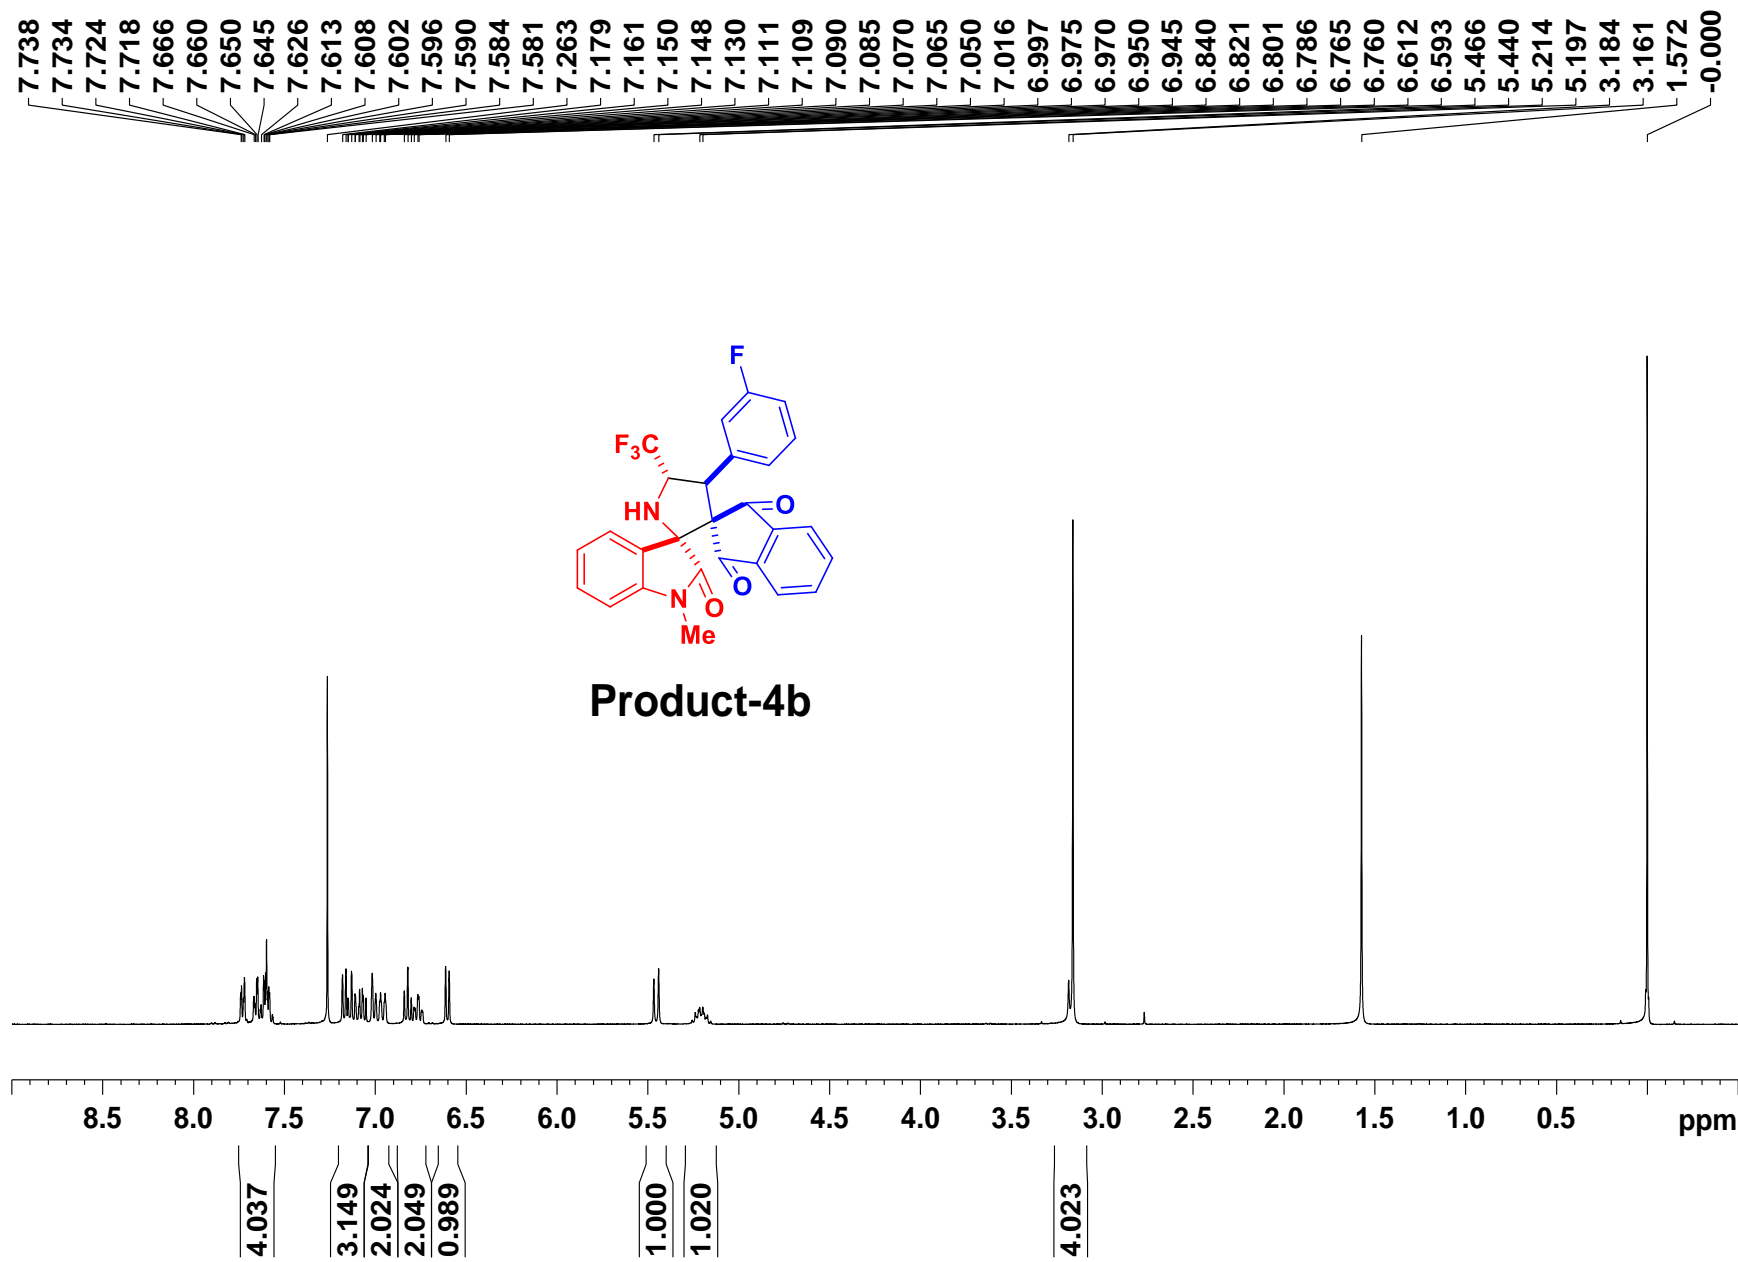

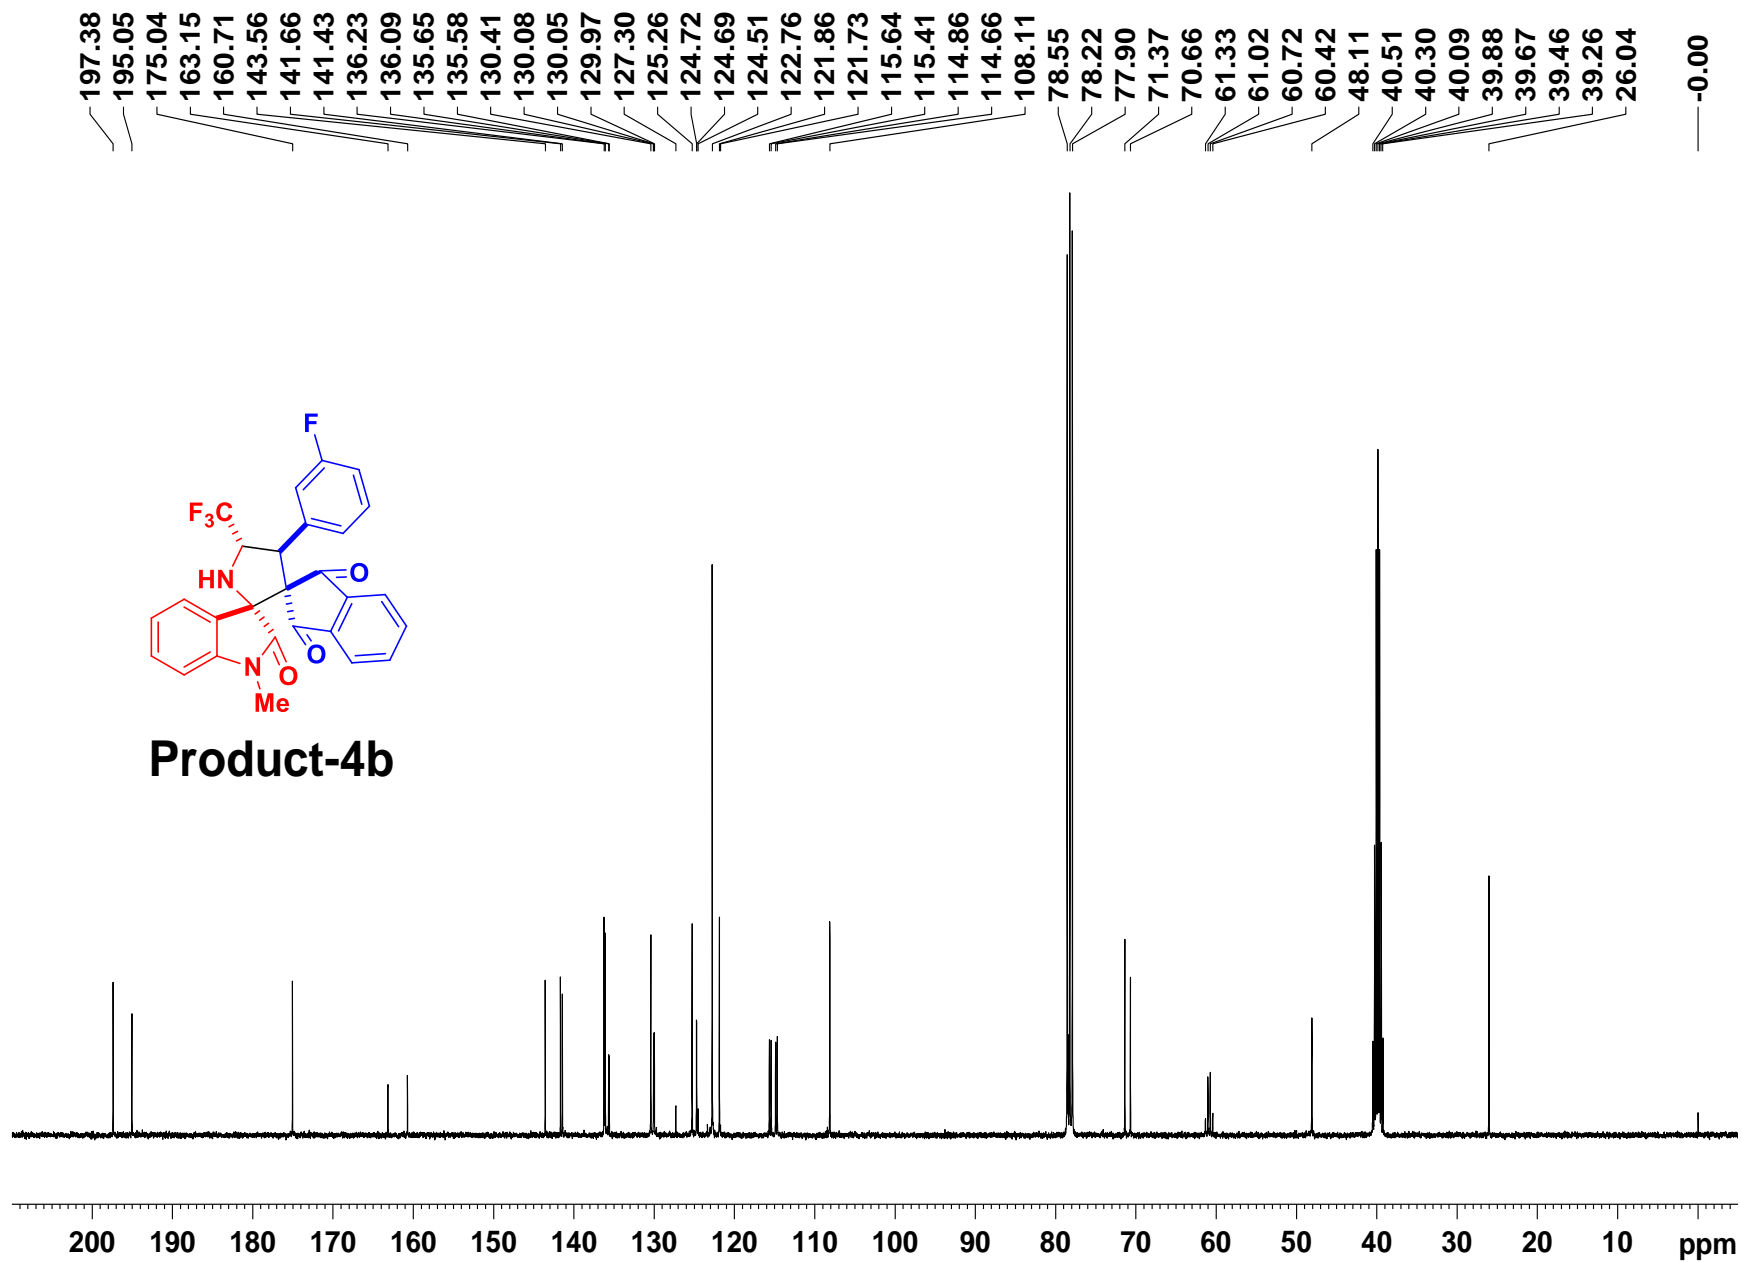

4b.2.fid  
Product-4b

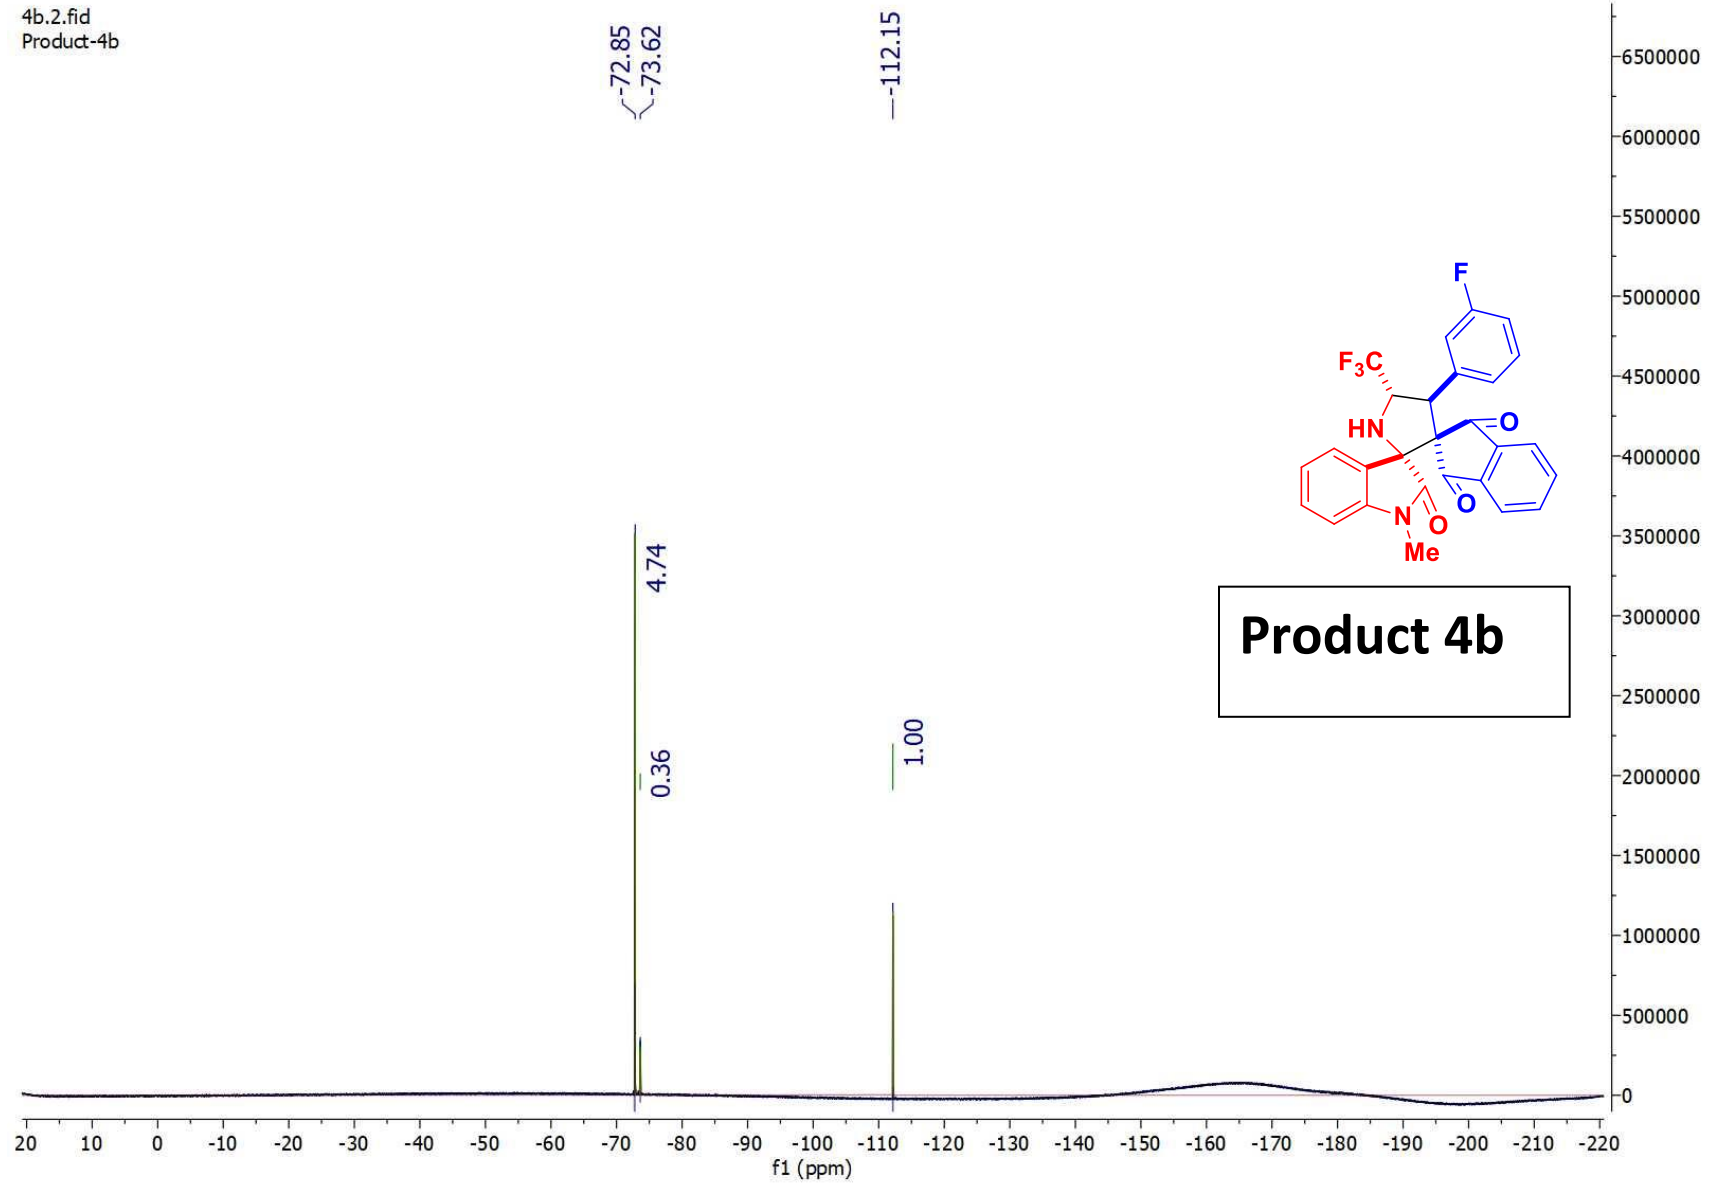



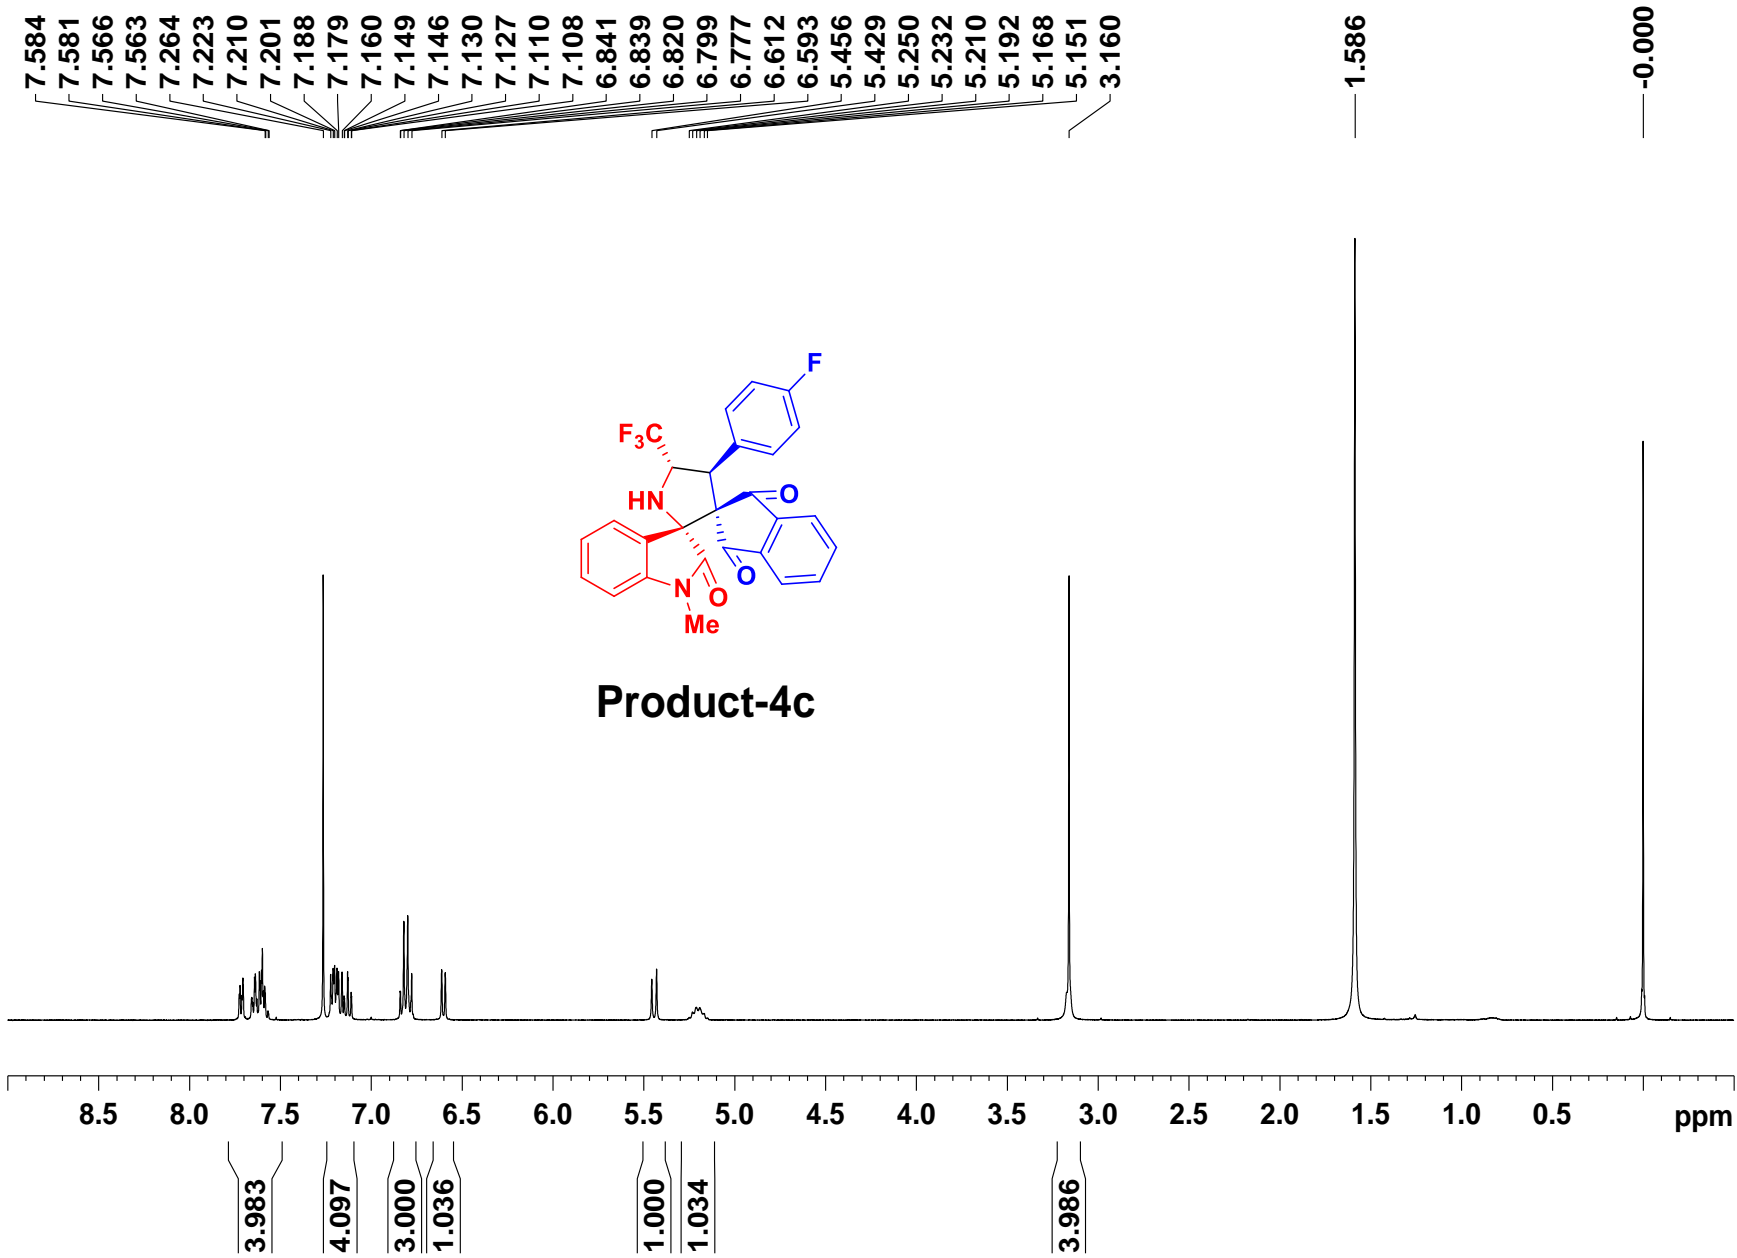

198.80  
195.36

175.30  
163.46  
161.00  
144.27  
142.33  
141.68  
136.06  
130.66  
130.49  
130.41  
129.87  
128.38  
128.34  
127.09  
124.69  
124.31  
123.38  
123.13  
122.87  
122.31  
121.53  
115.59  
115.38  
108.36

77.35

77.04

76.72

70.82

70.65

61.82

61.51

61.21

60.90

48.77

26.41

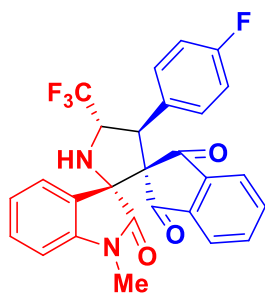

**Product-4c**

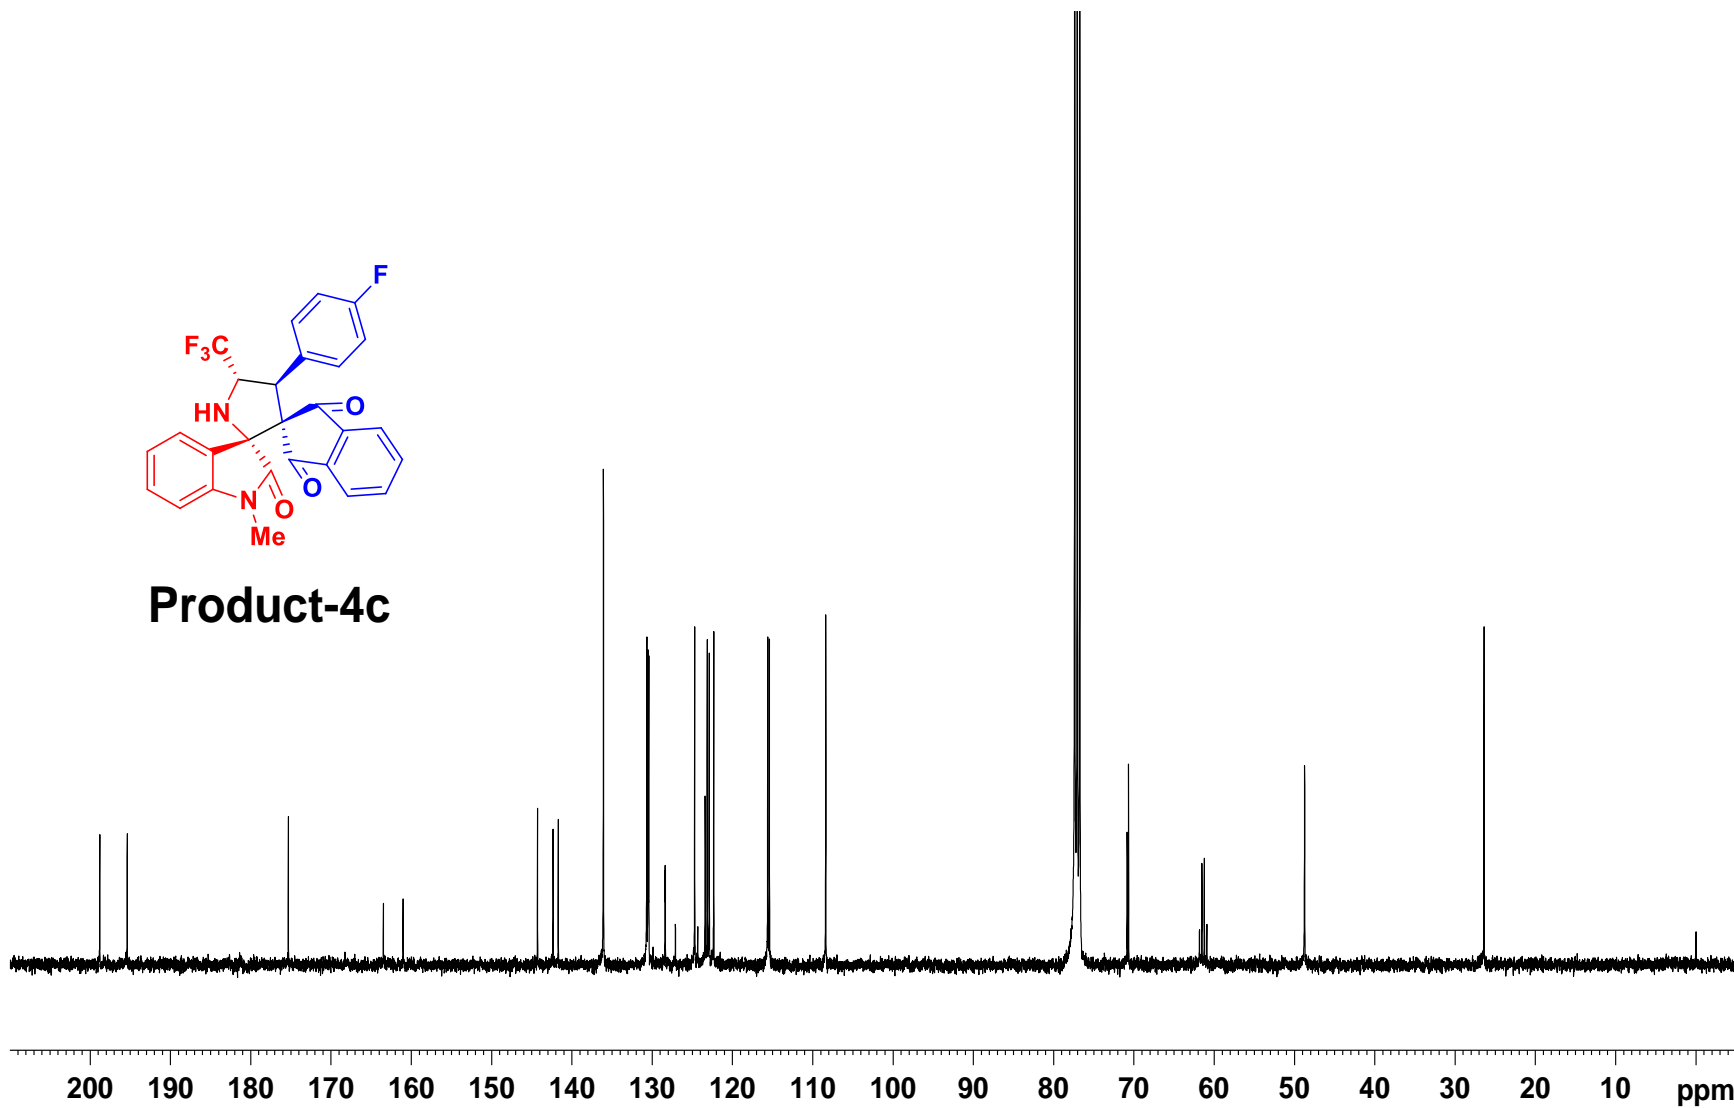

4c.2.fid  
Product-4c

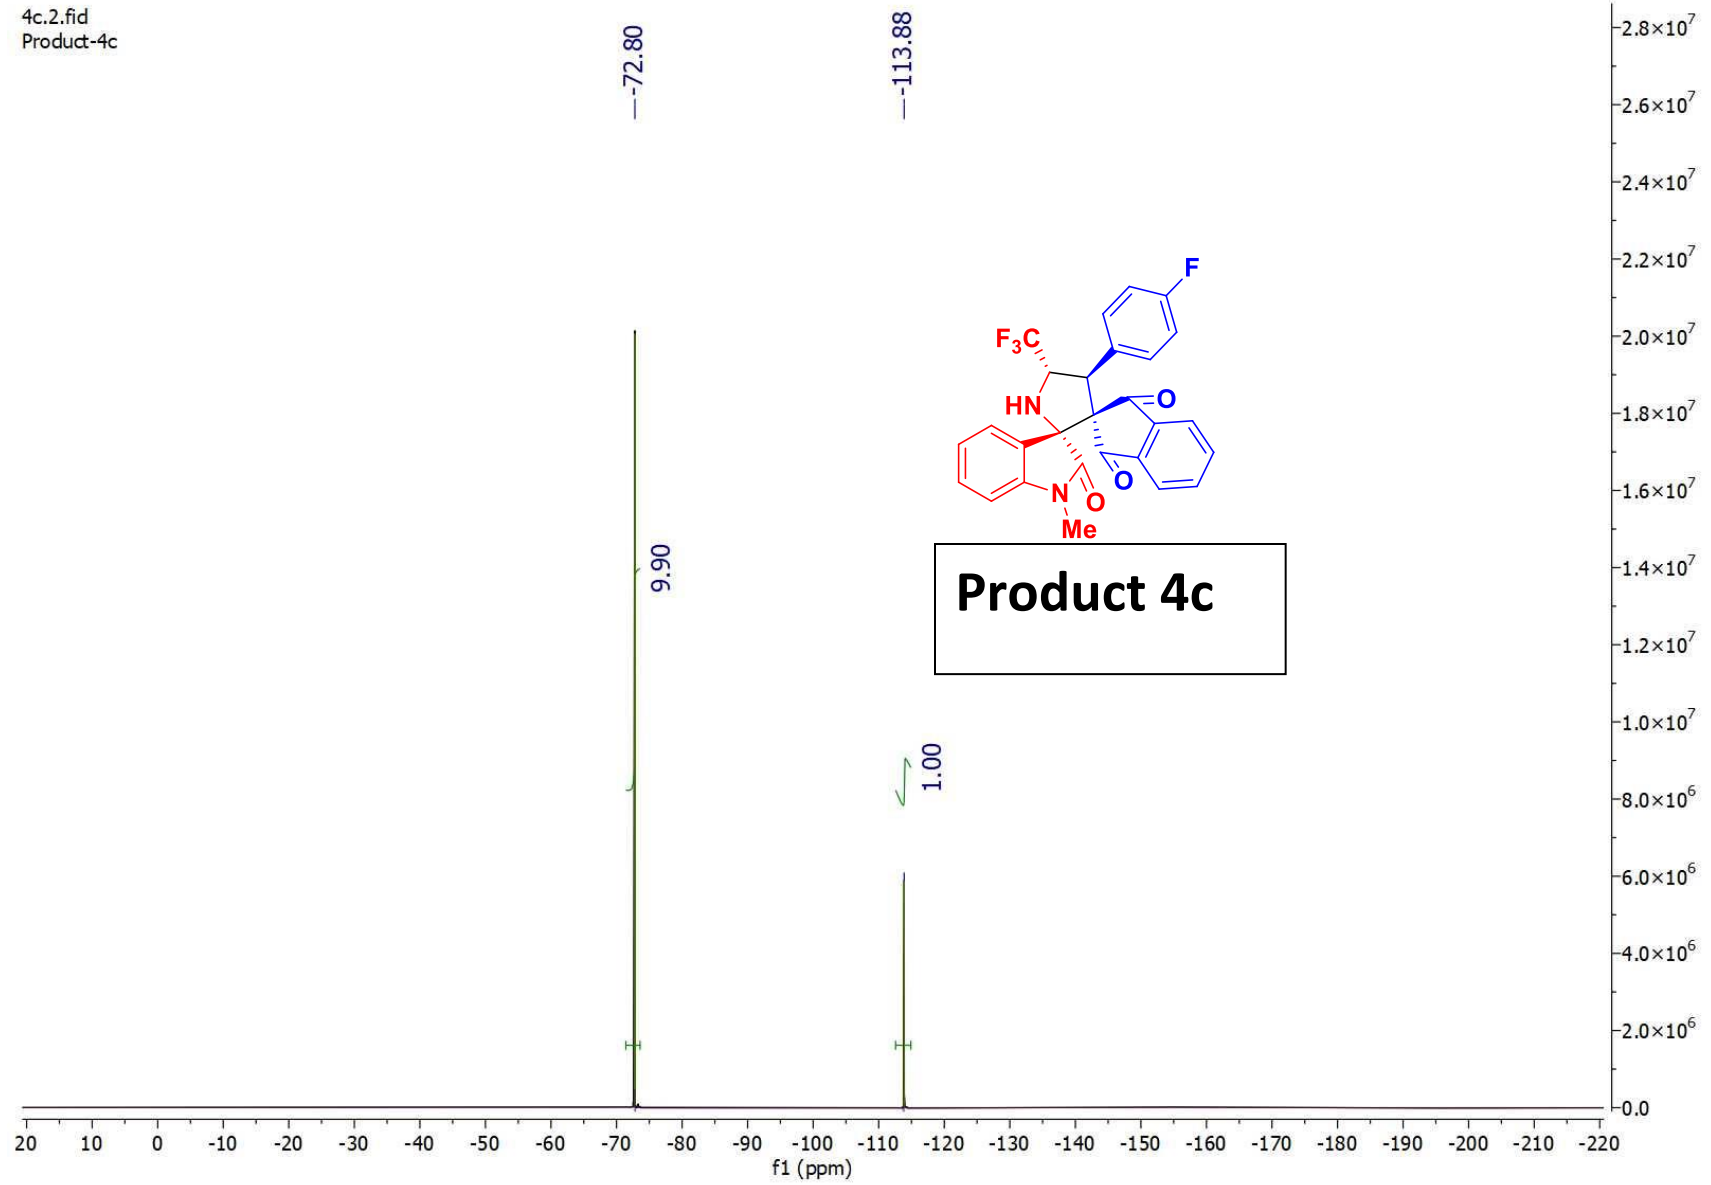

7.748  
7.742  
7.736  
7.727  
7.679  
7.676  
7.669  
7.664  
7.658  
7.616  
7.603  
7.598  
7.590  
7.581  
7.577  
7.563  
7.397  
7.394  
7.378  
7.374  
7.260  
7.236  
7.217  
7.173  
7.154  
7.136  
7.134  
7.064  
7.061  
7.046  
7.043  
7.027  
7.023  
6.997  
6.993  
6.977  
6.974  
6.959  
6.955  
6.846  
6.827  
6.808  
6.645  
6.625  
6.392  
6.365  
5.077  
5.061  
3.214  
1.579  
-0.004

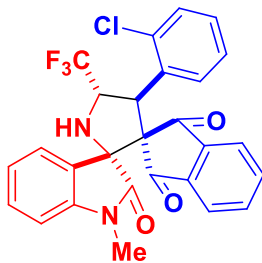

Product-4d

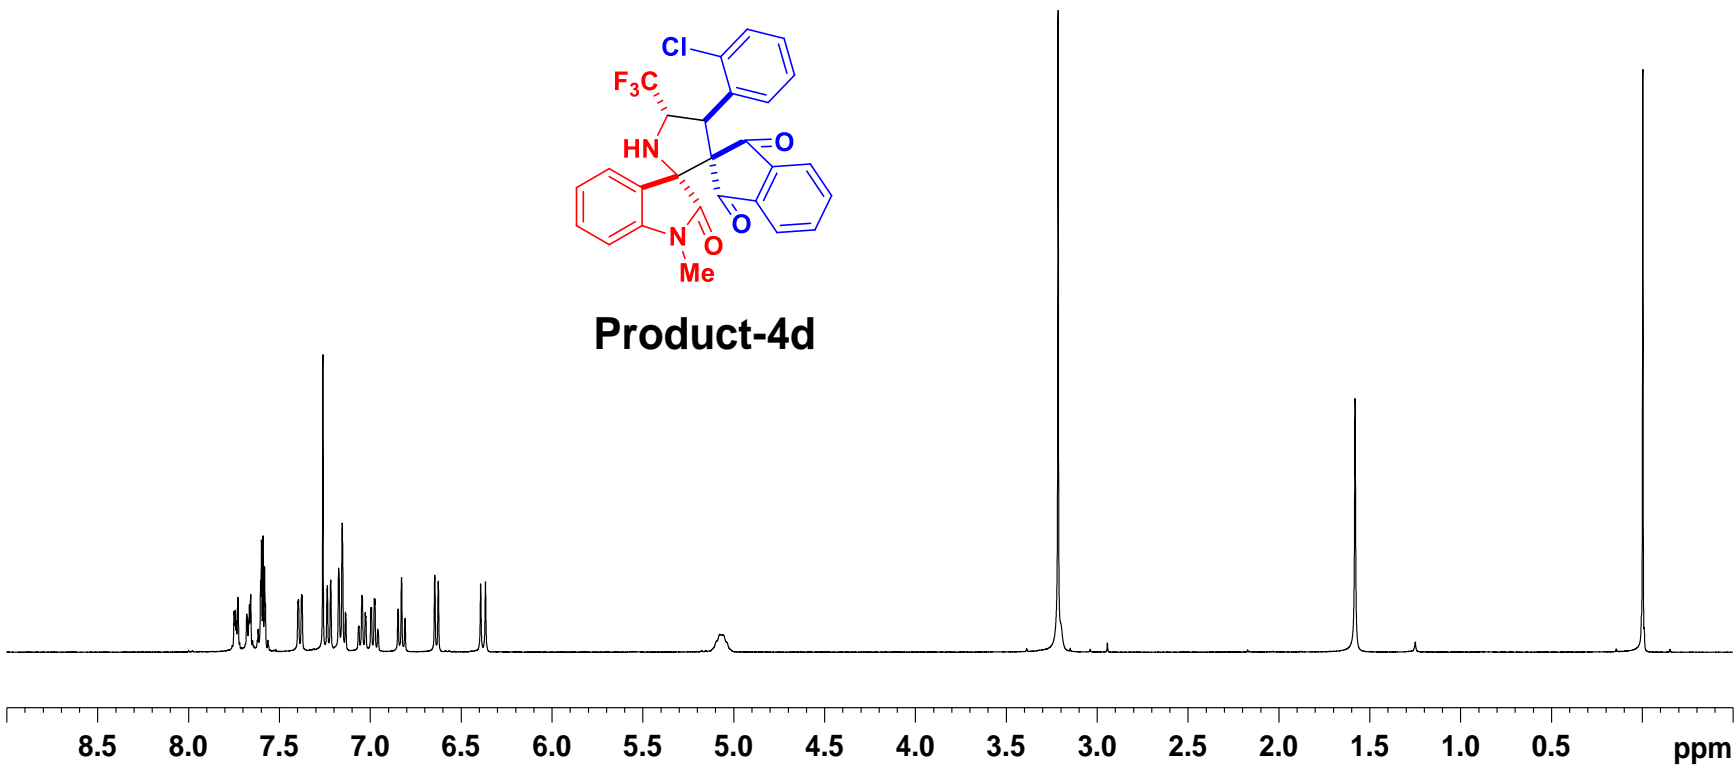

4.086  
1.069  
1.079  
2.073  
0.948  
1.061  
1.063  
1.010  
0.994

1.046

S28

4.078

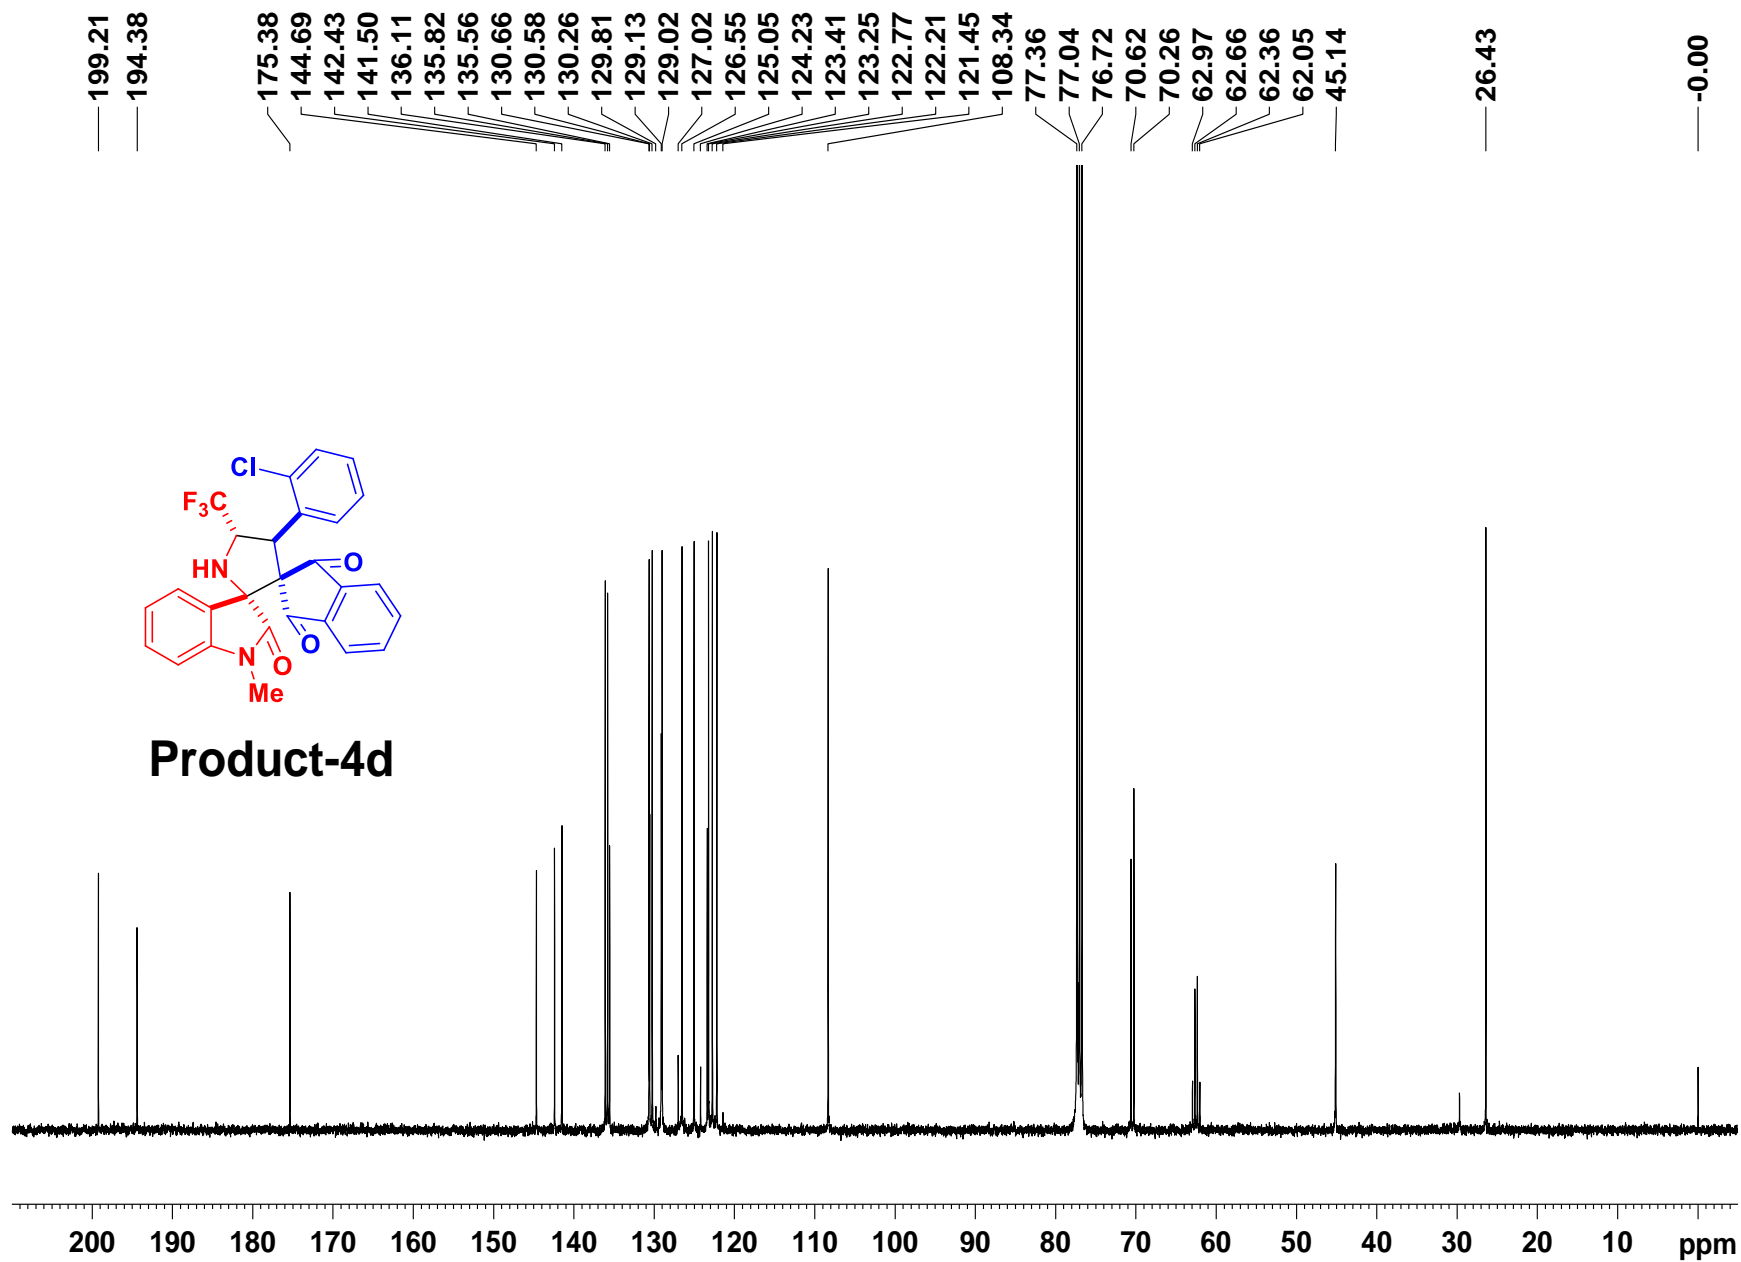

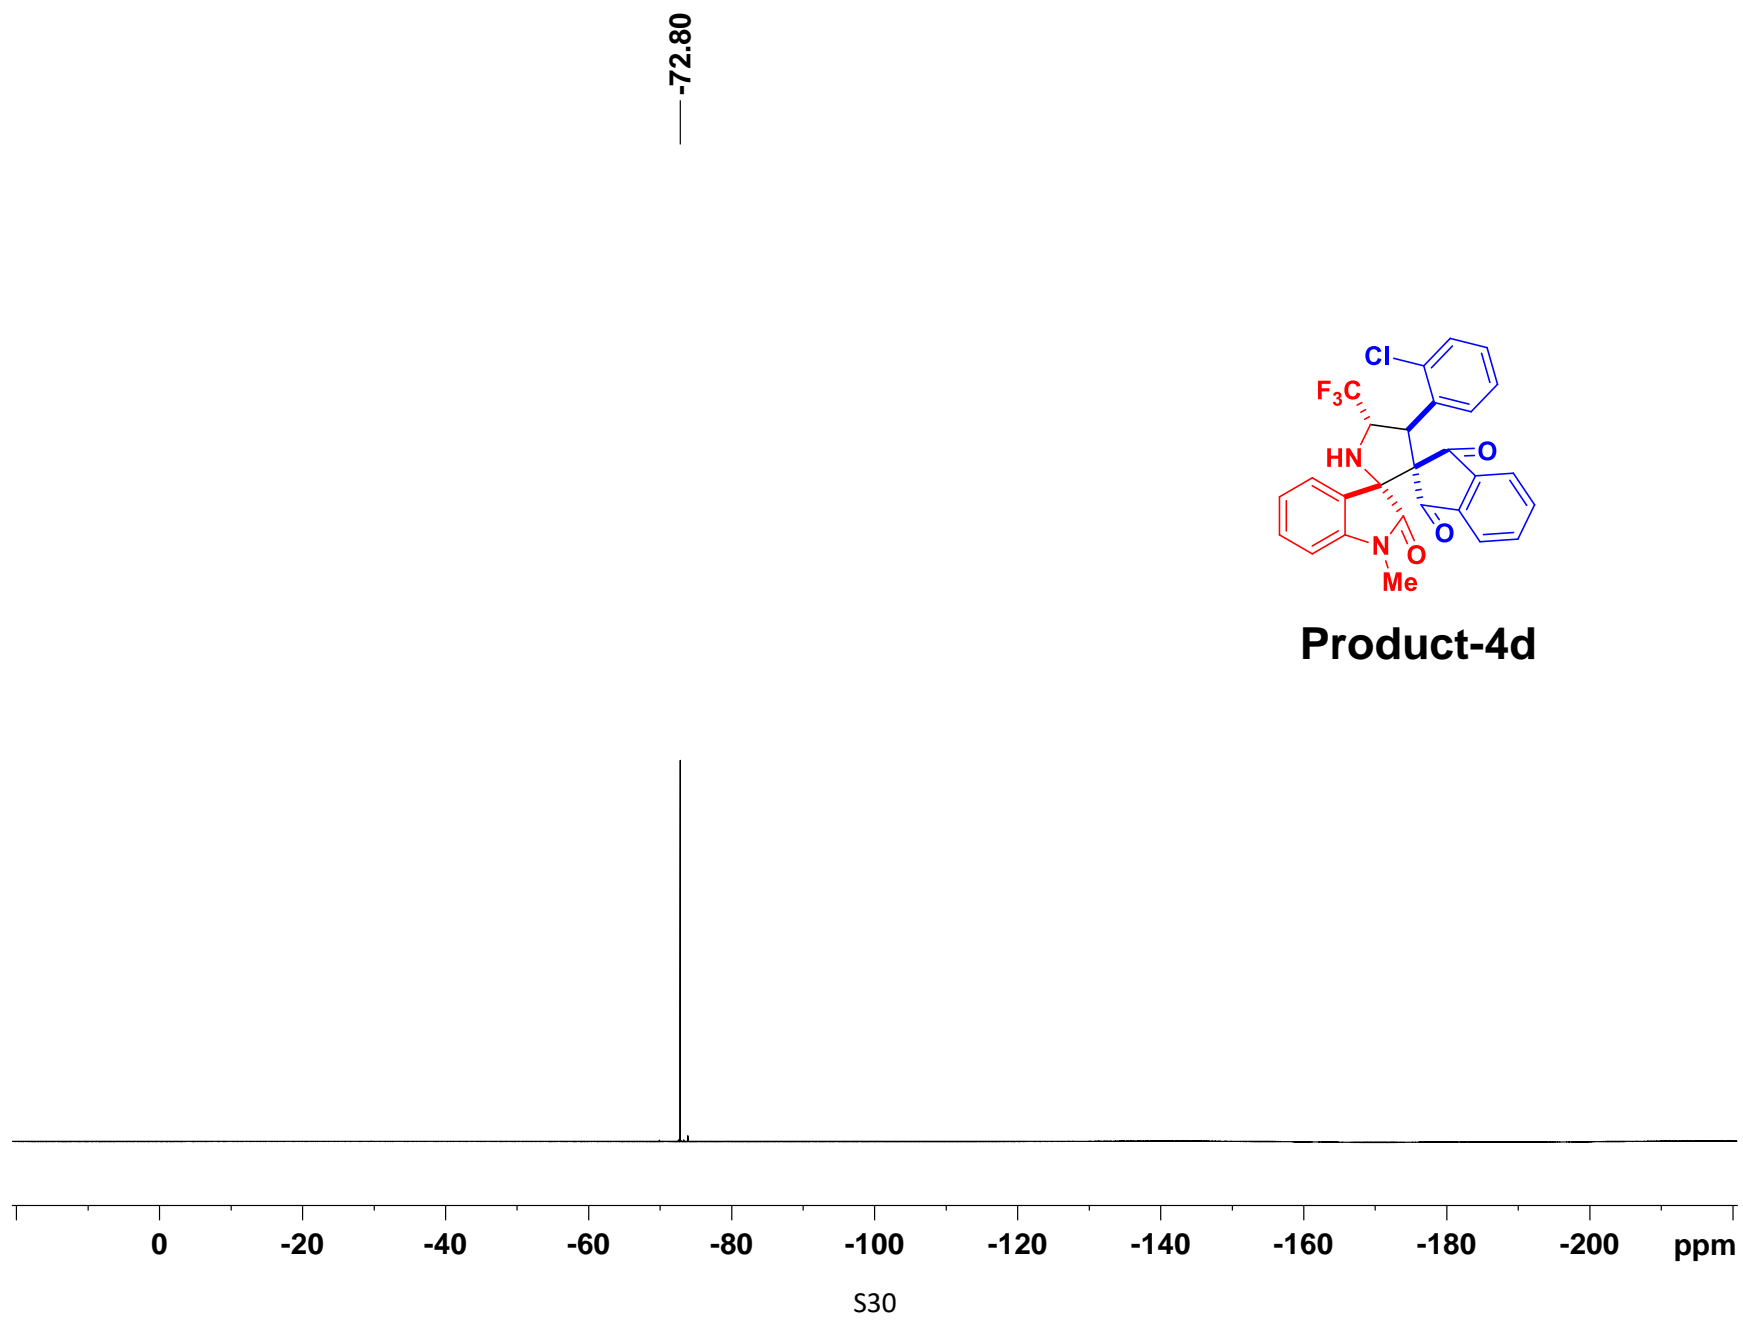

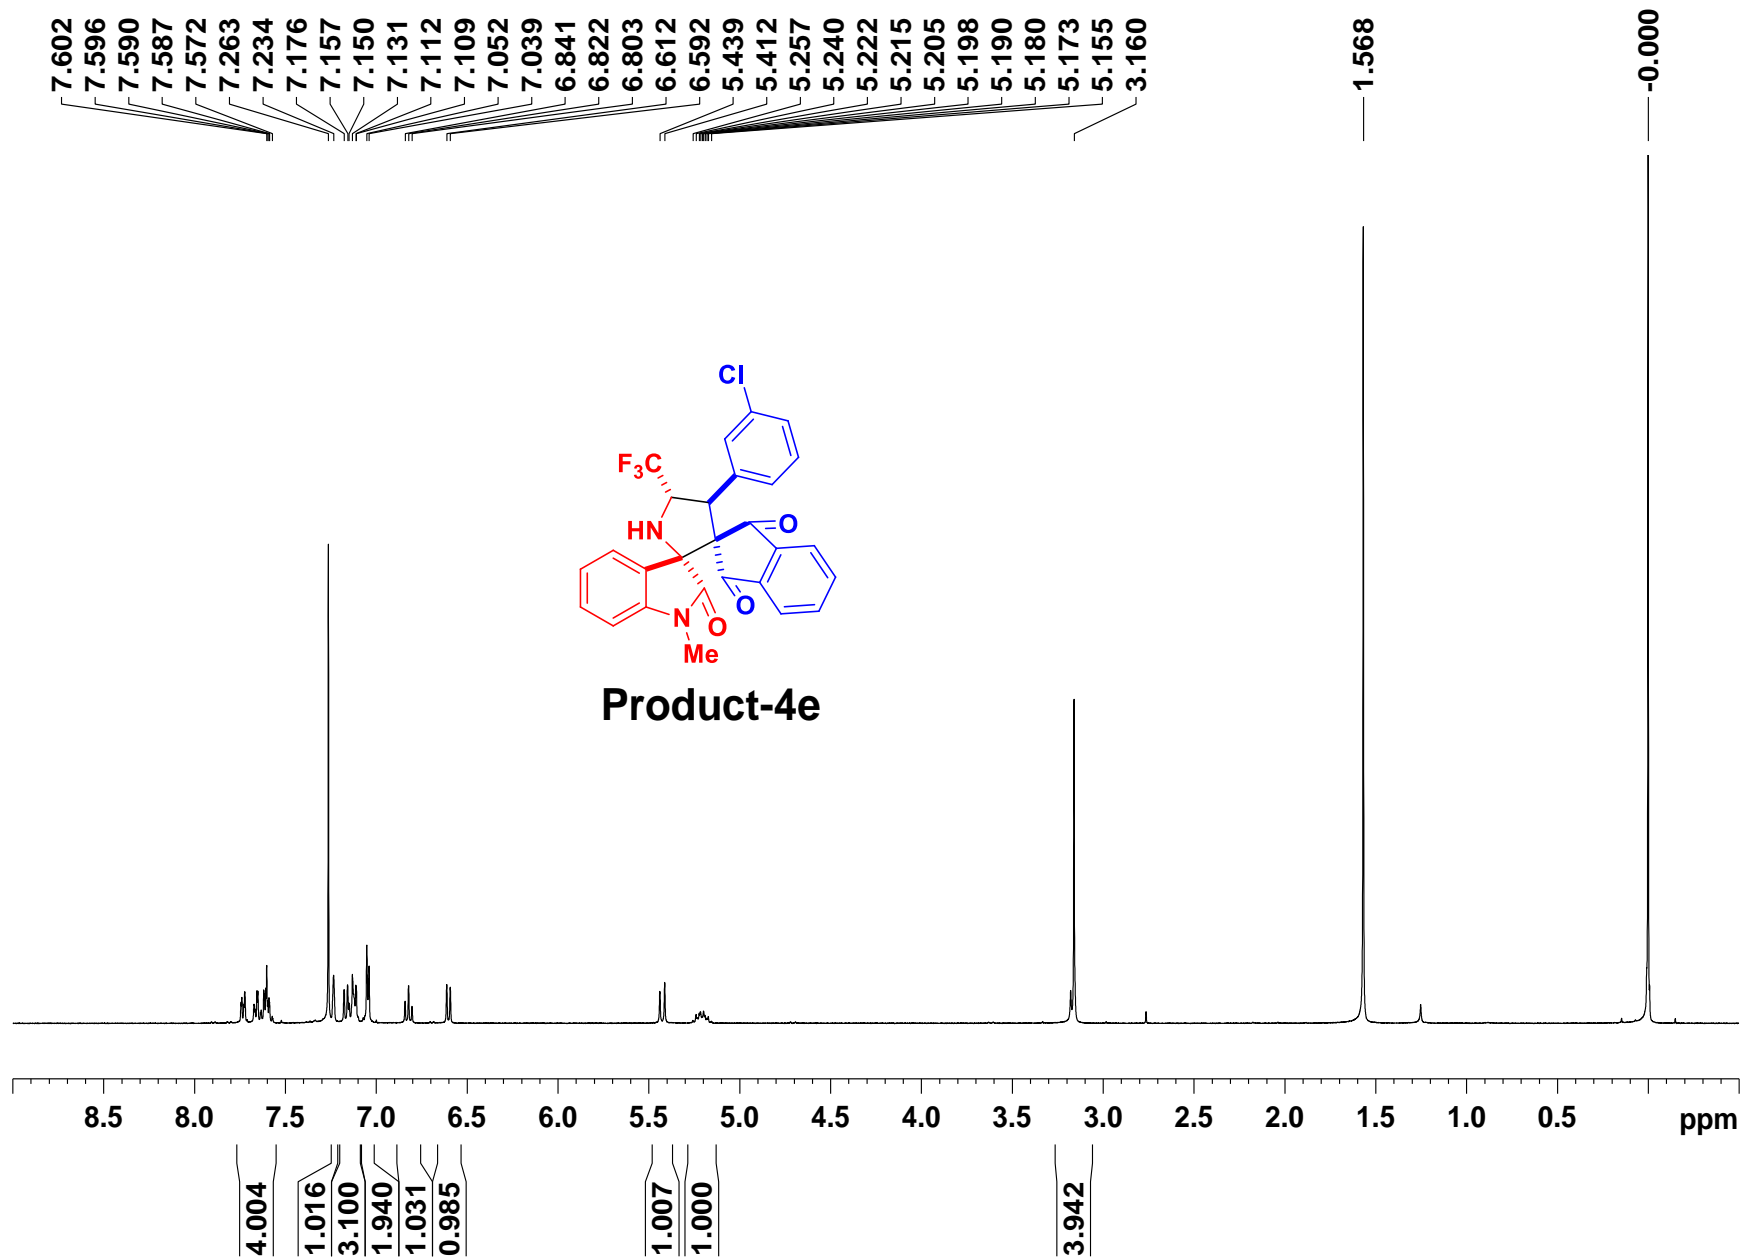

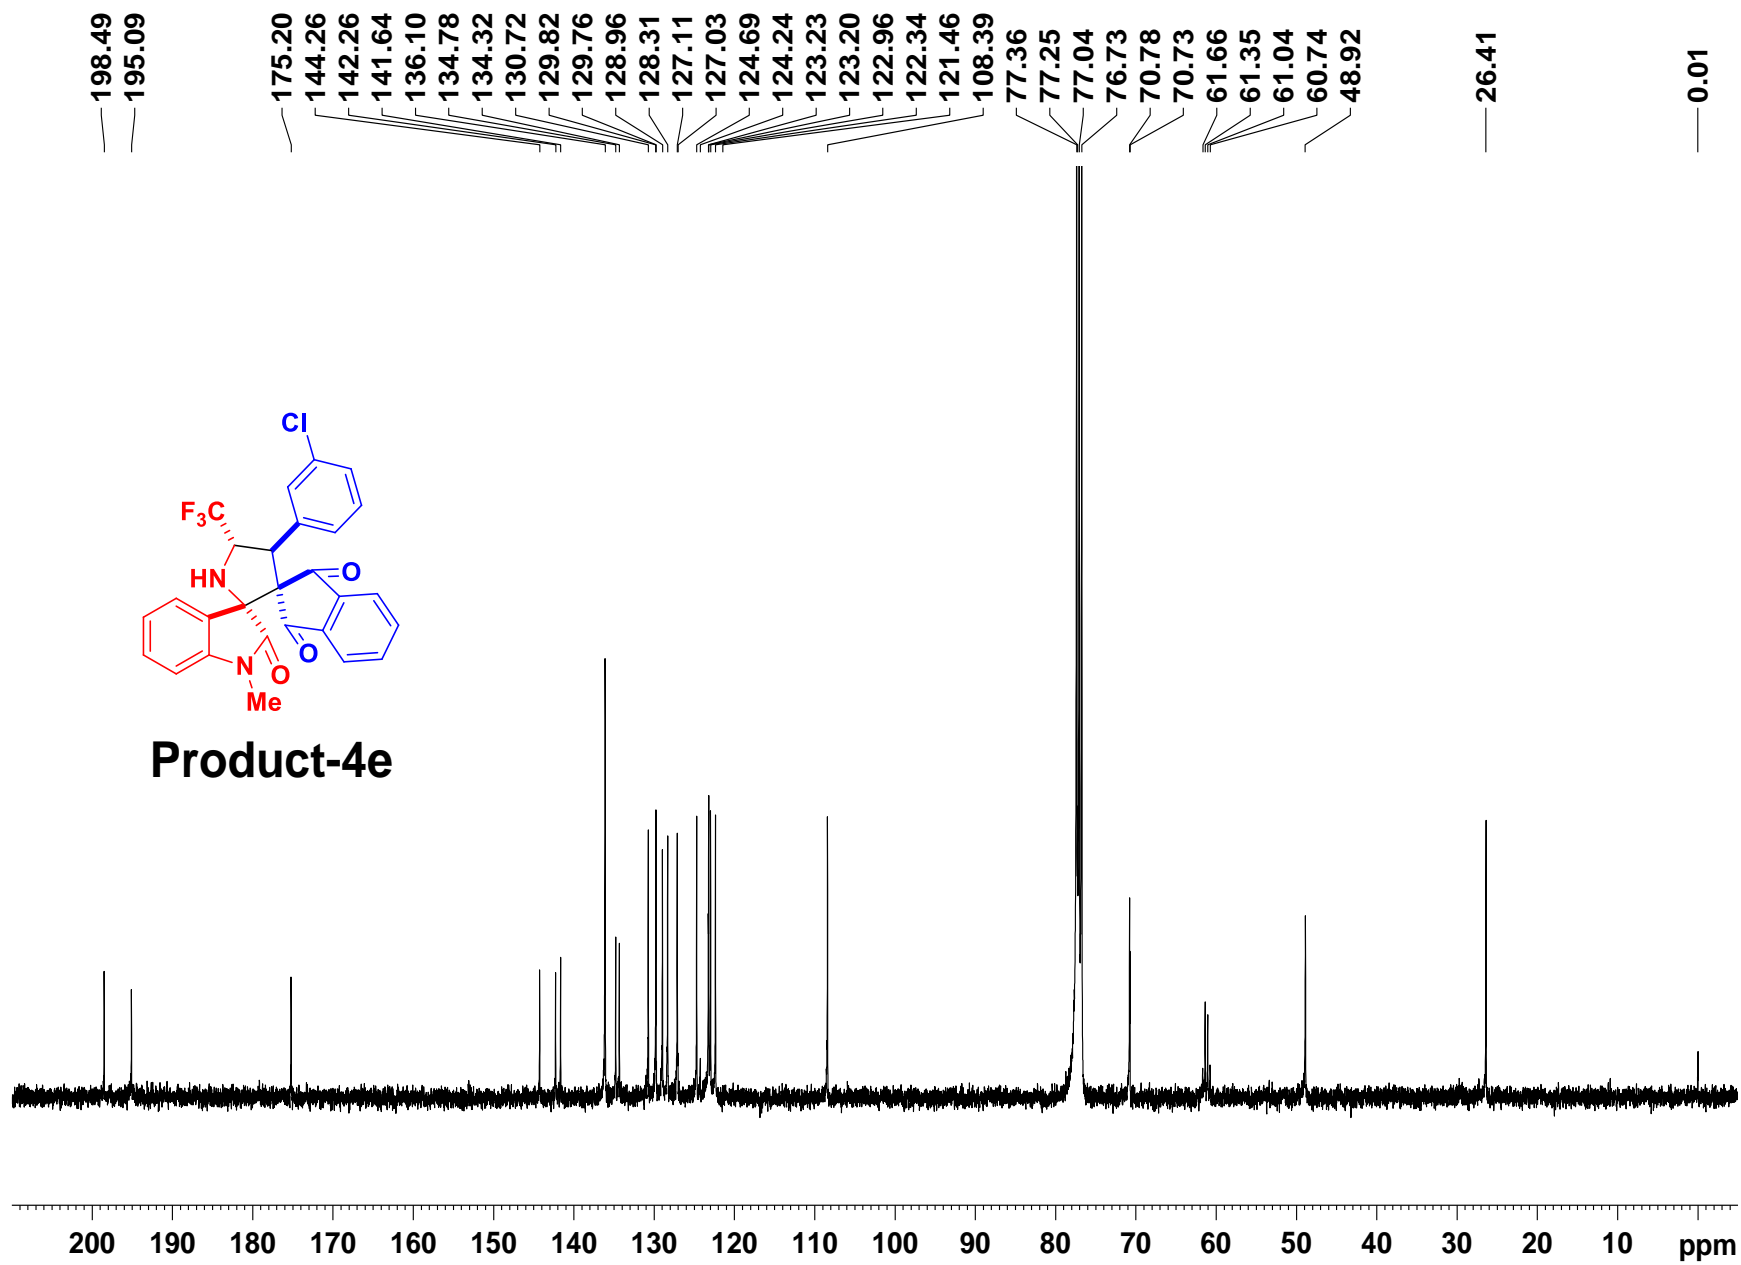



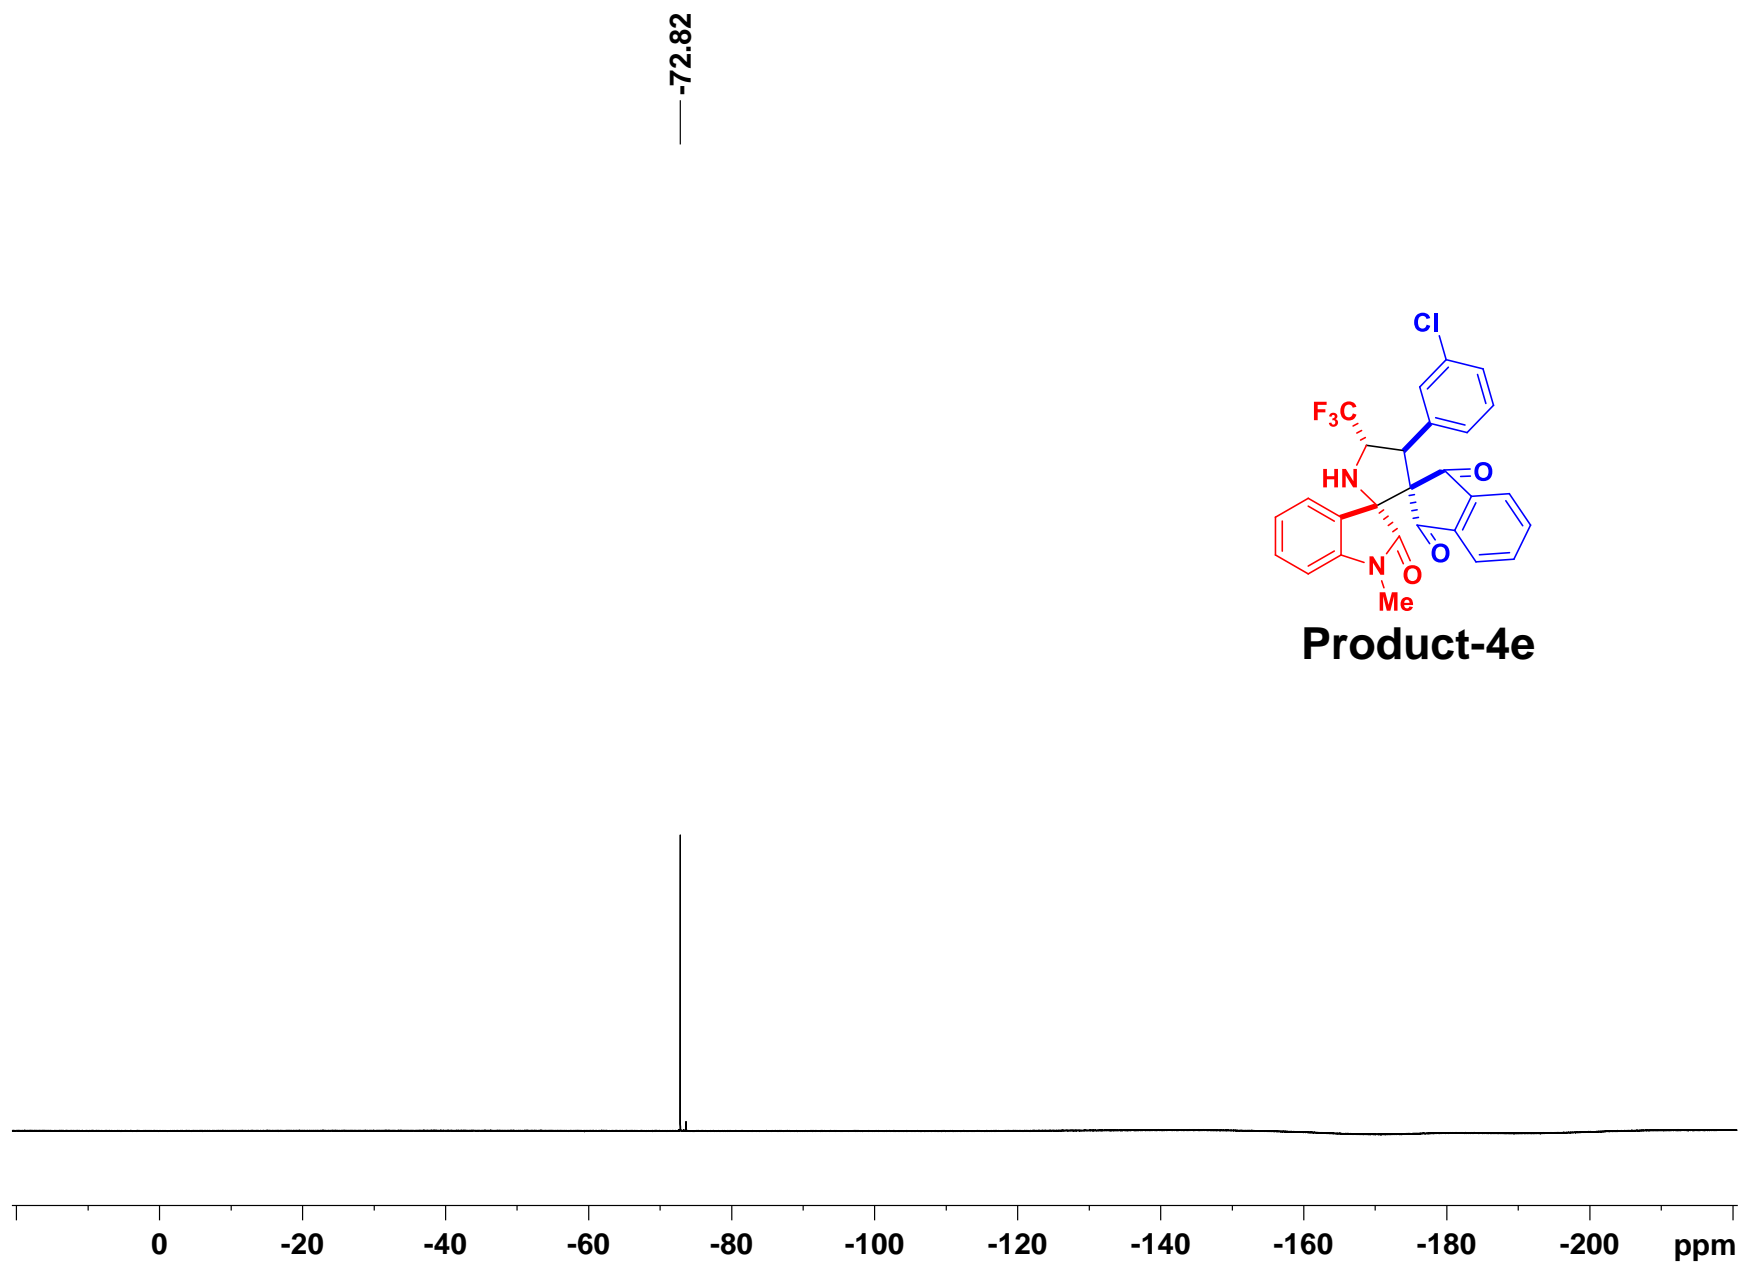

S33

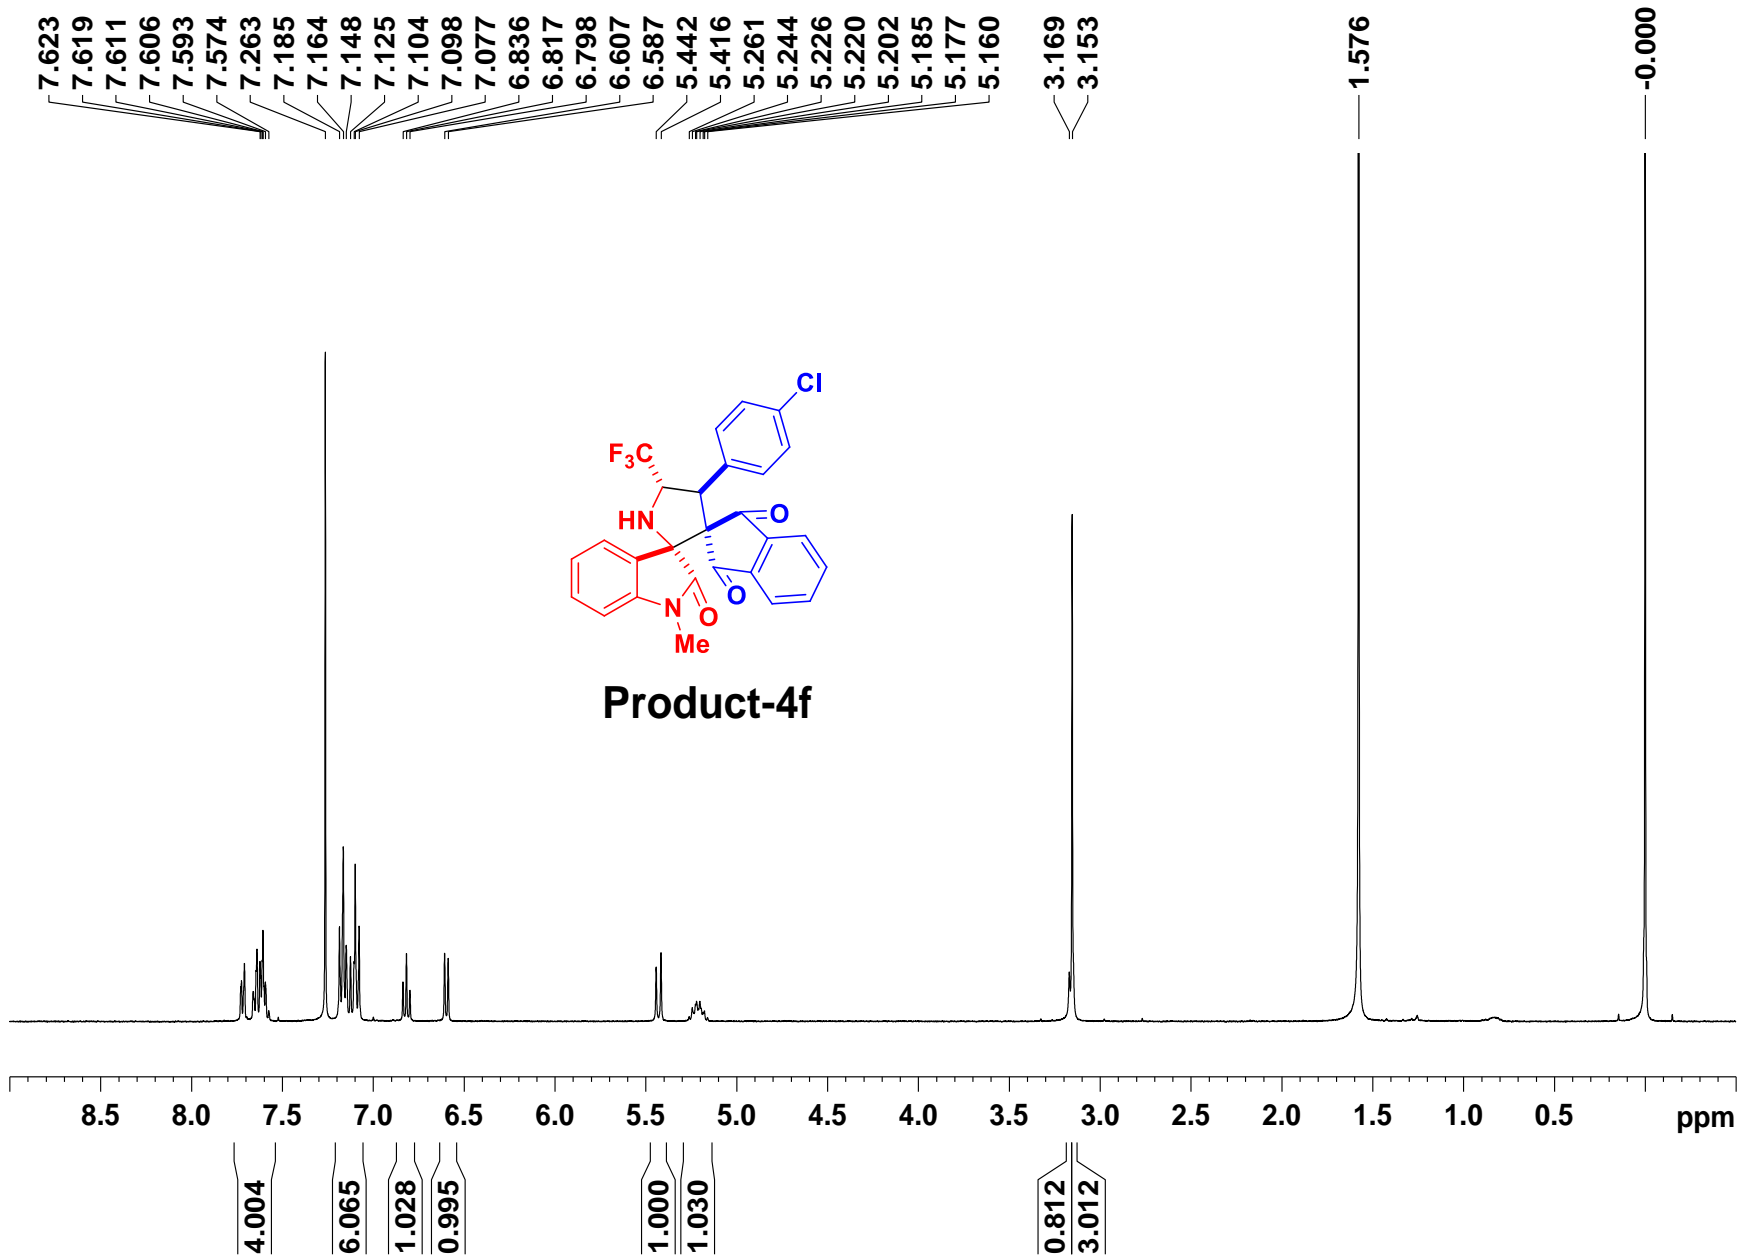

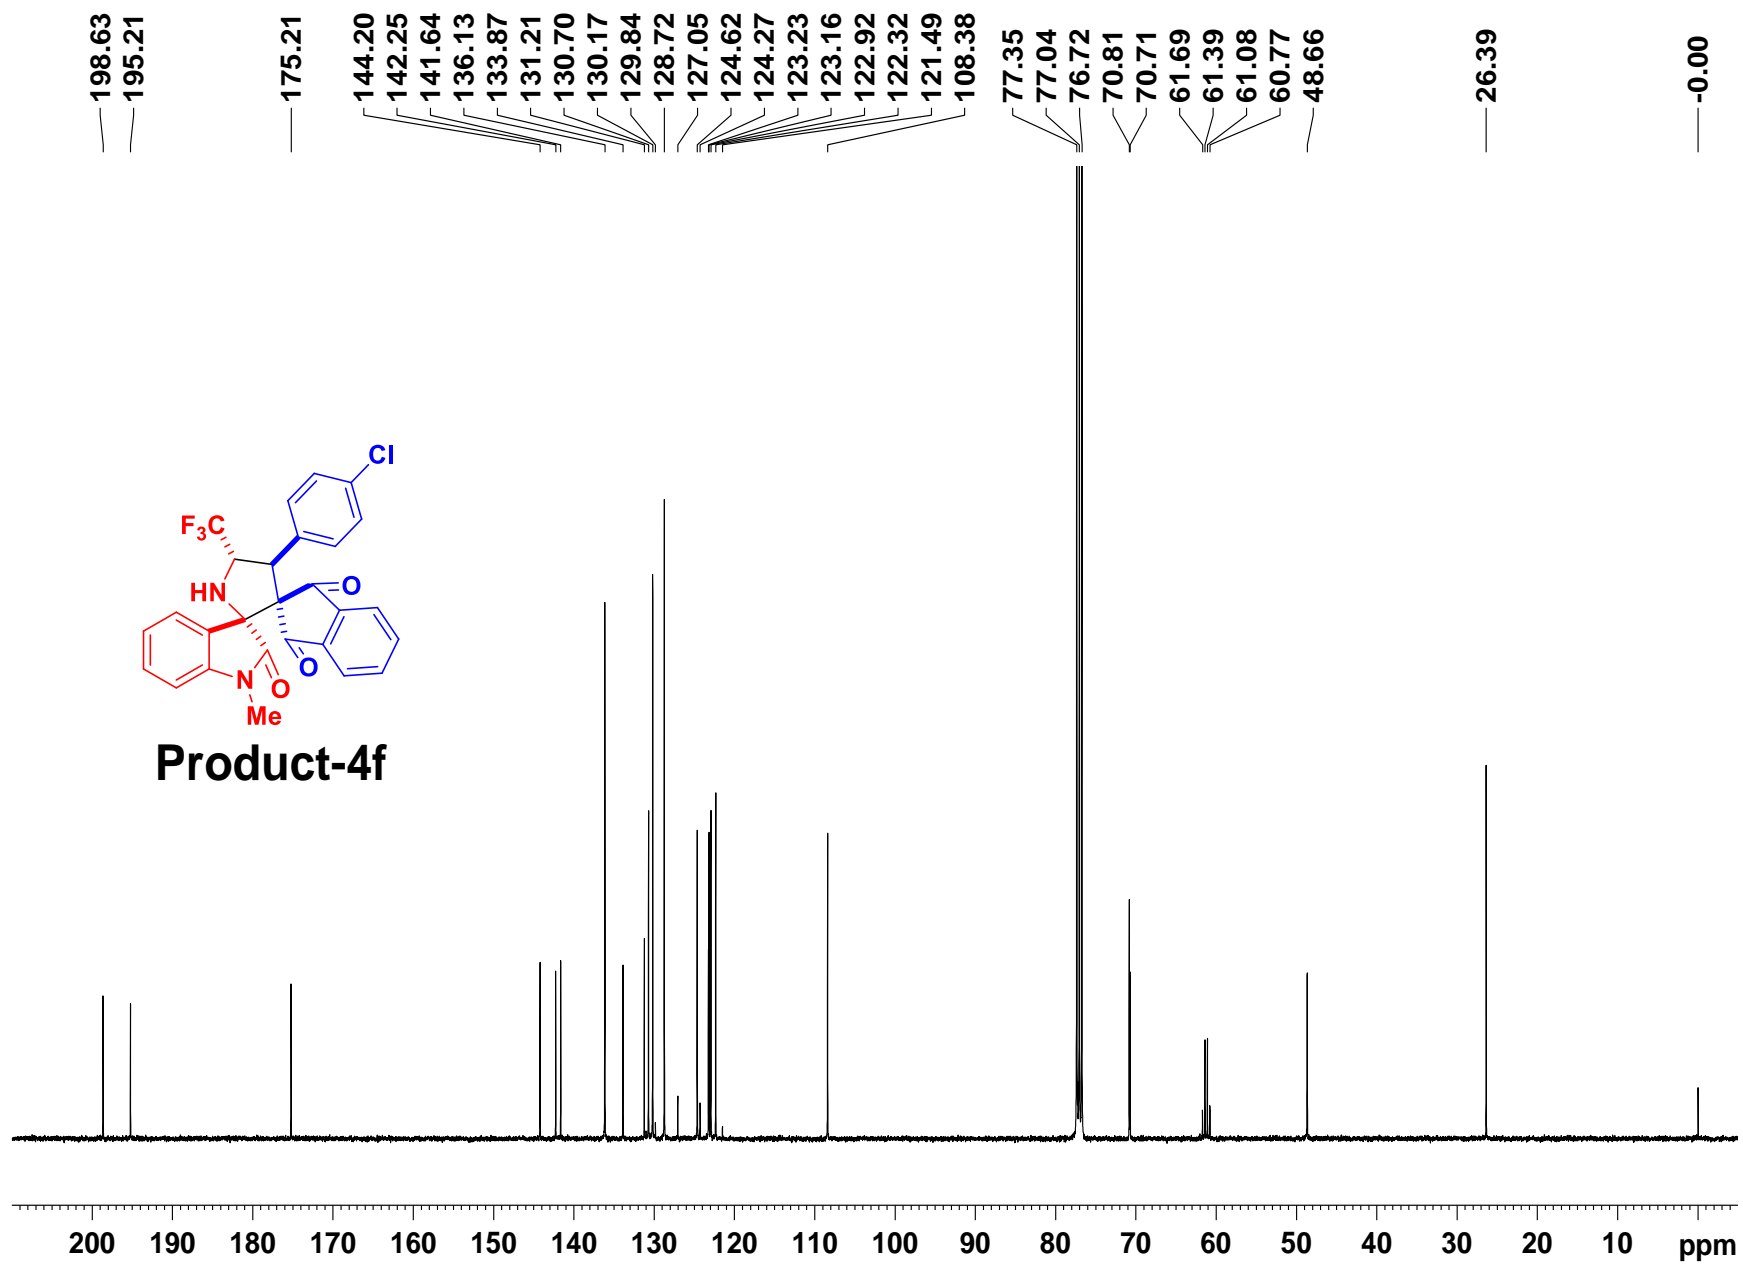

—72.84

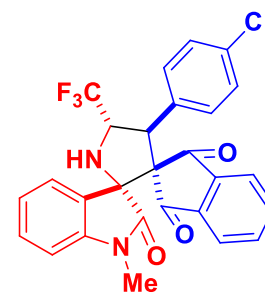

**Product-4f**

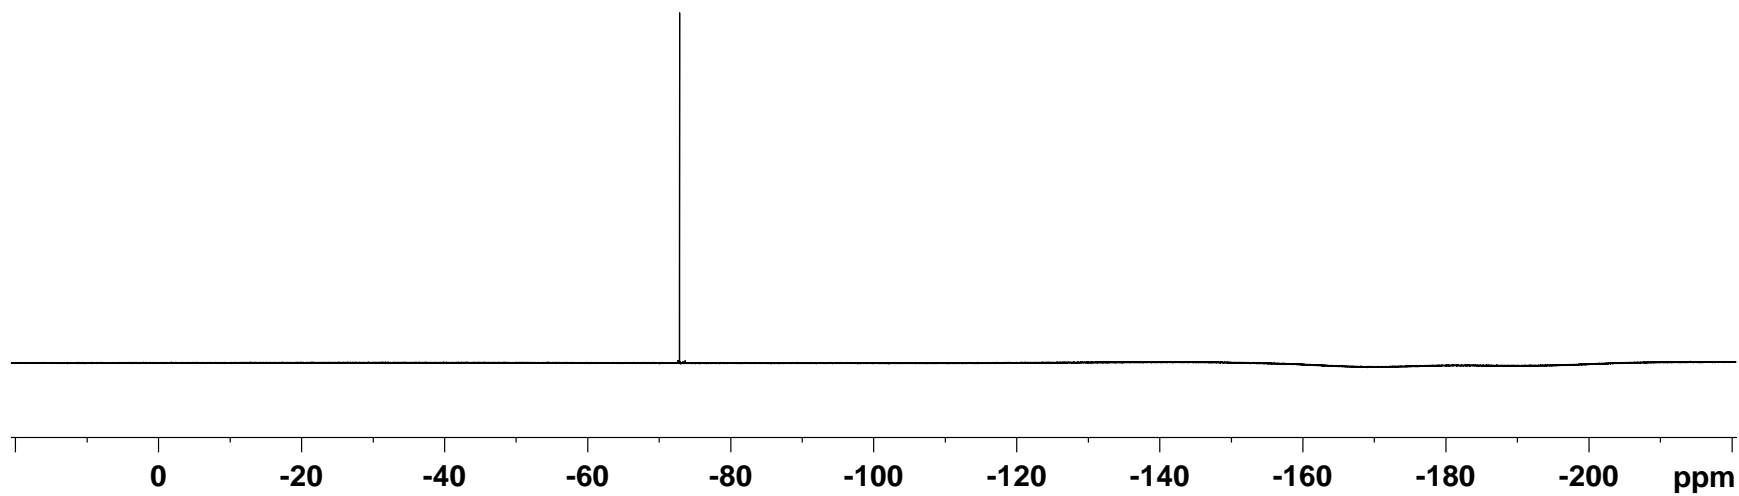

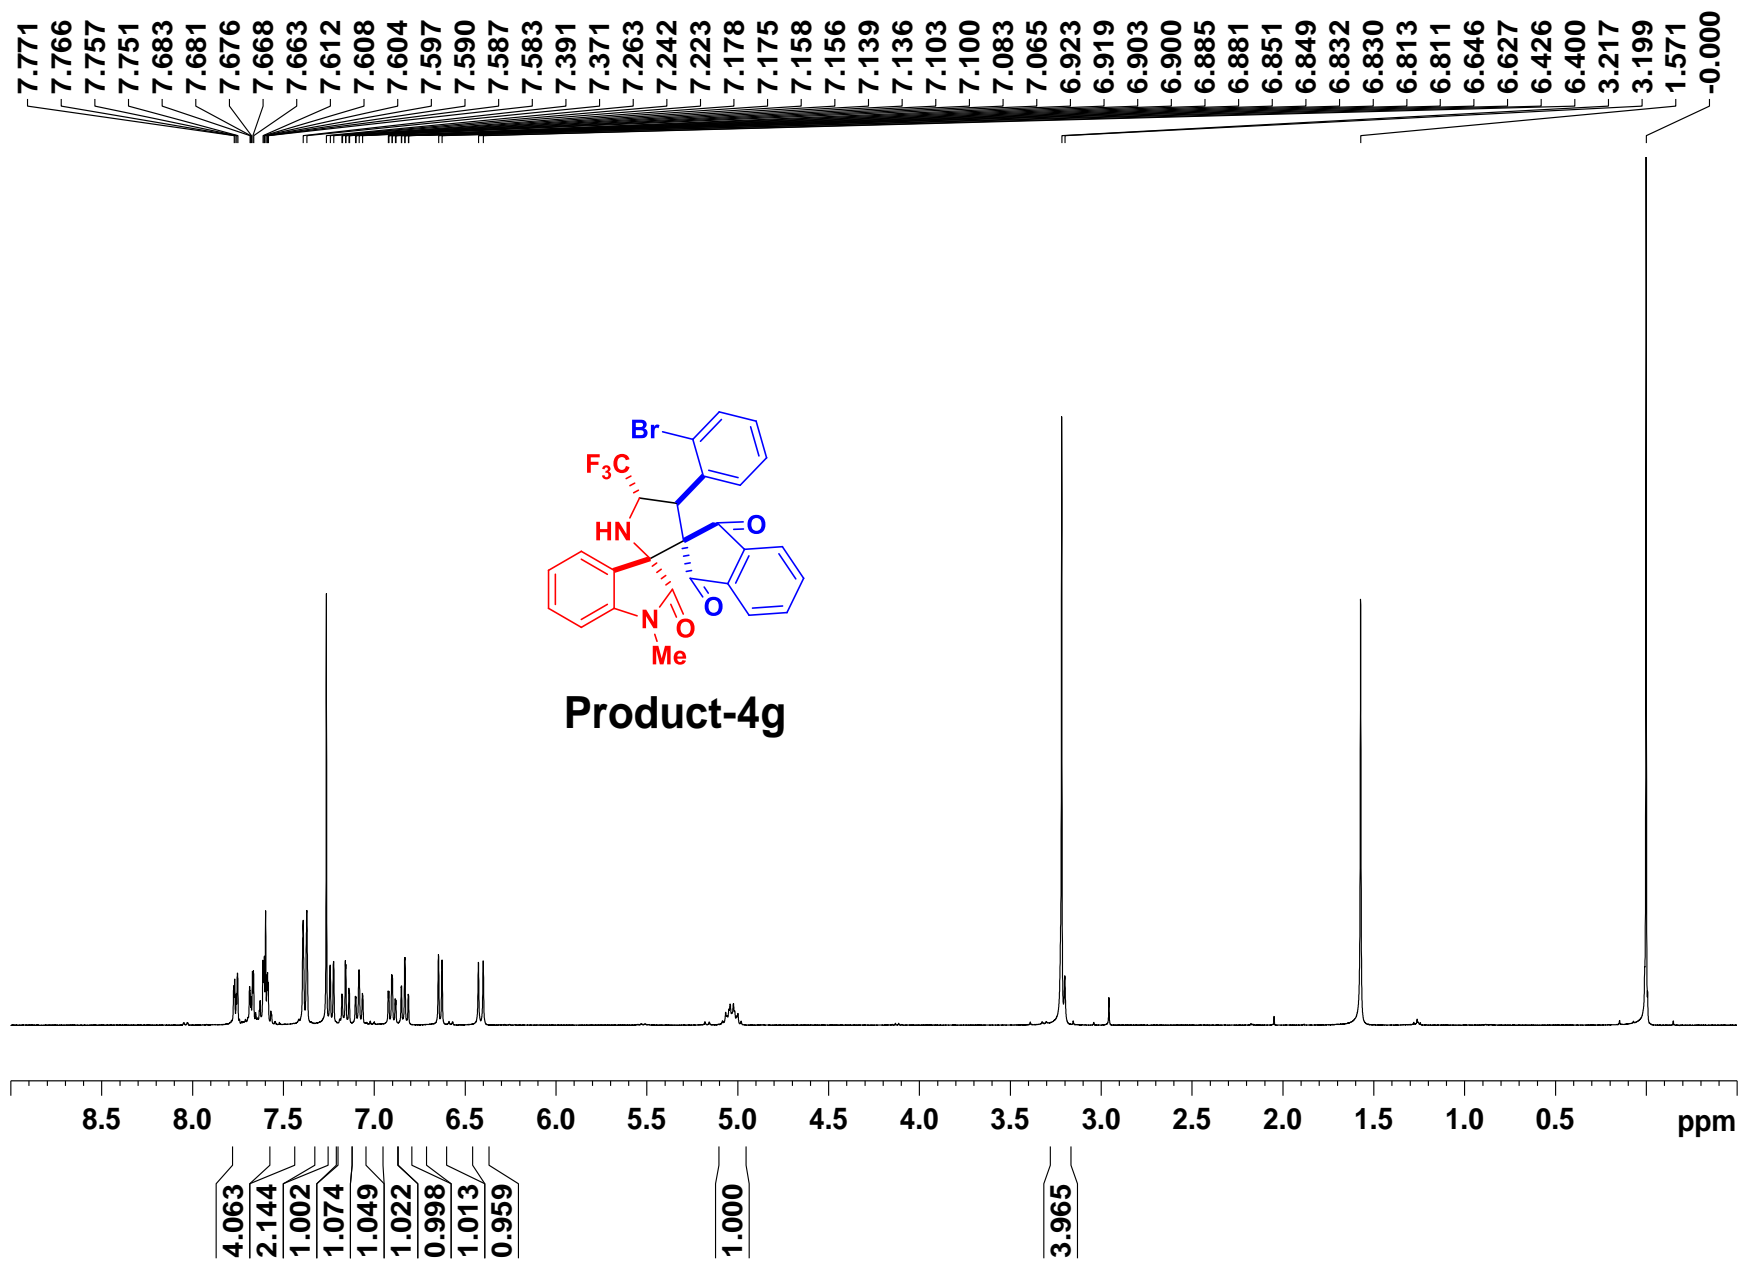

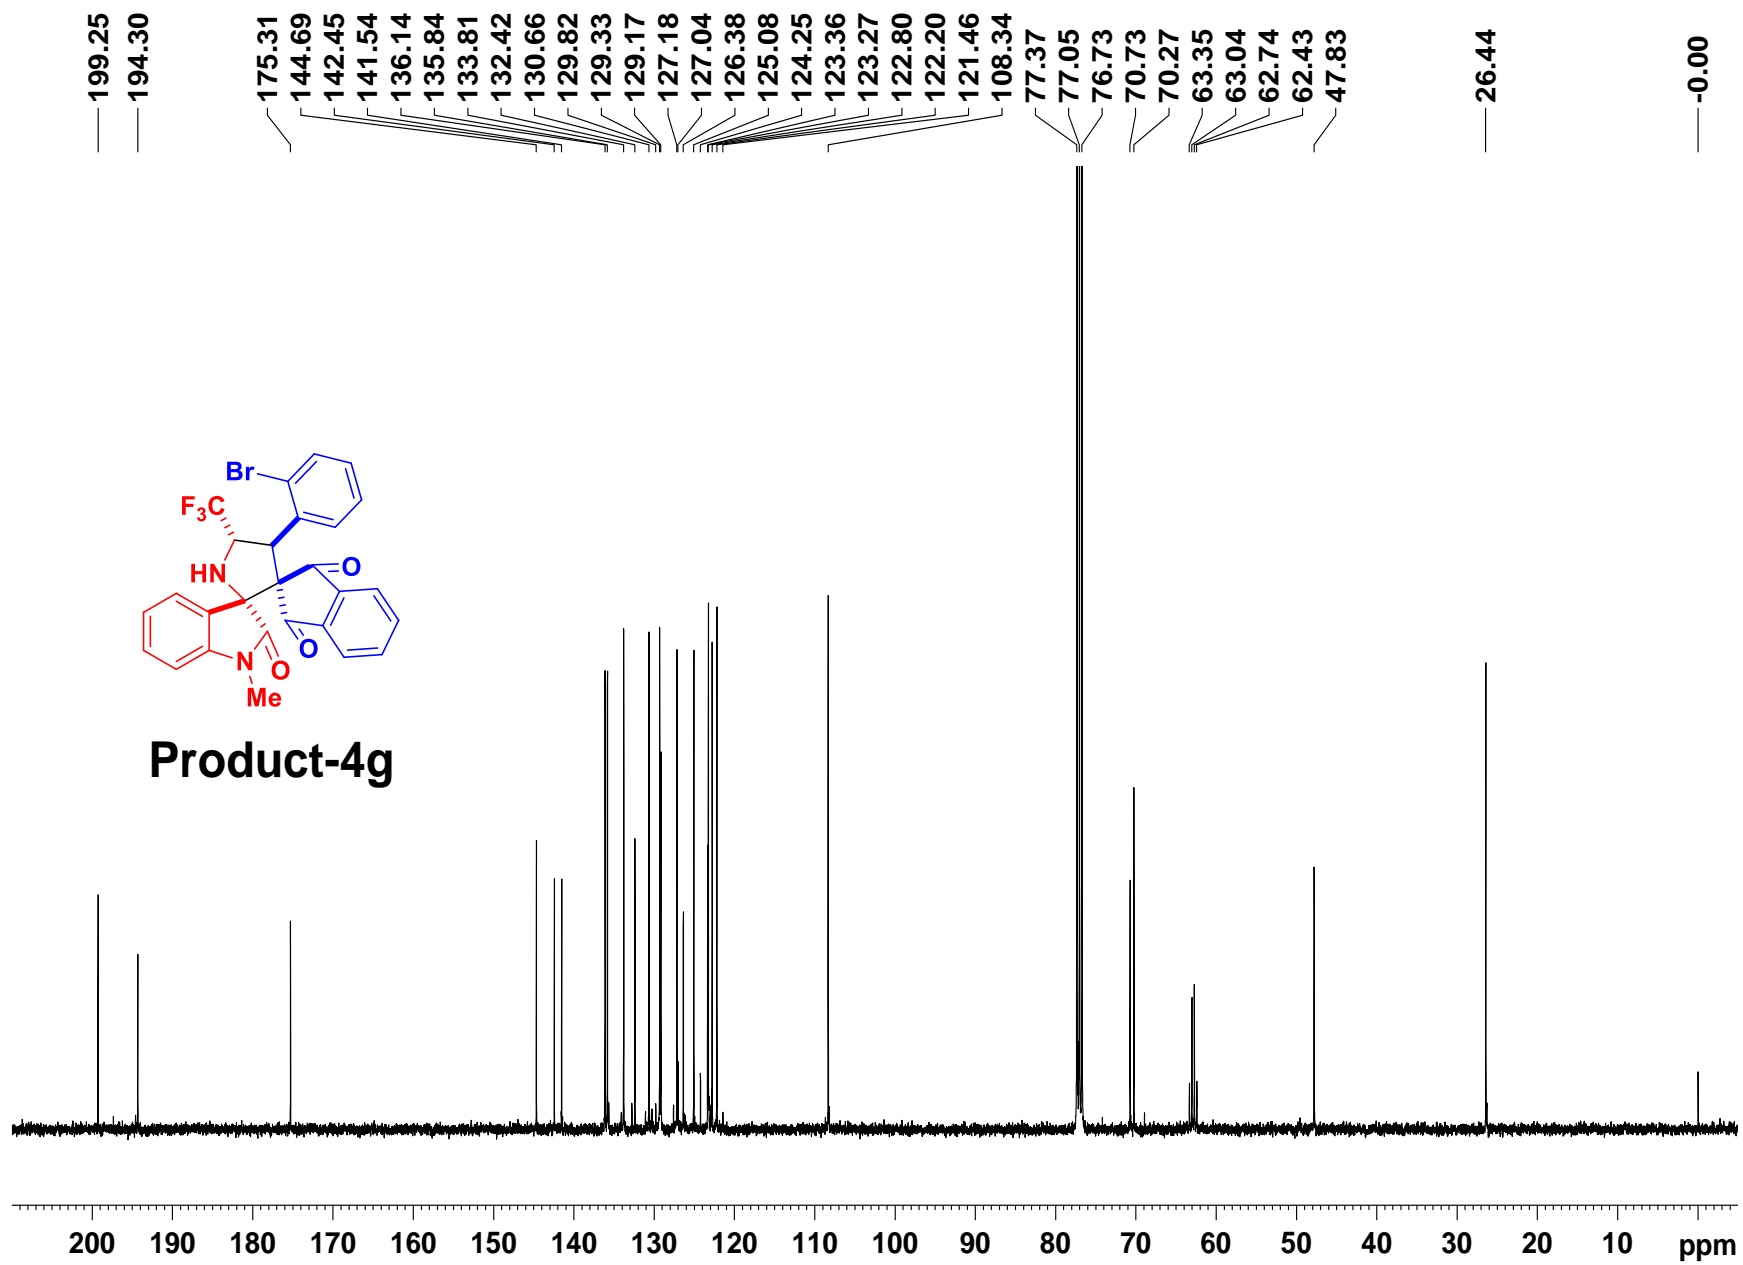

— -72.84

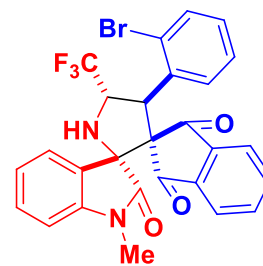

**Product-4g**

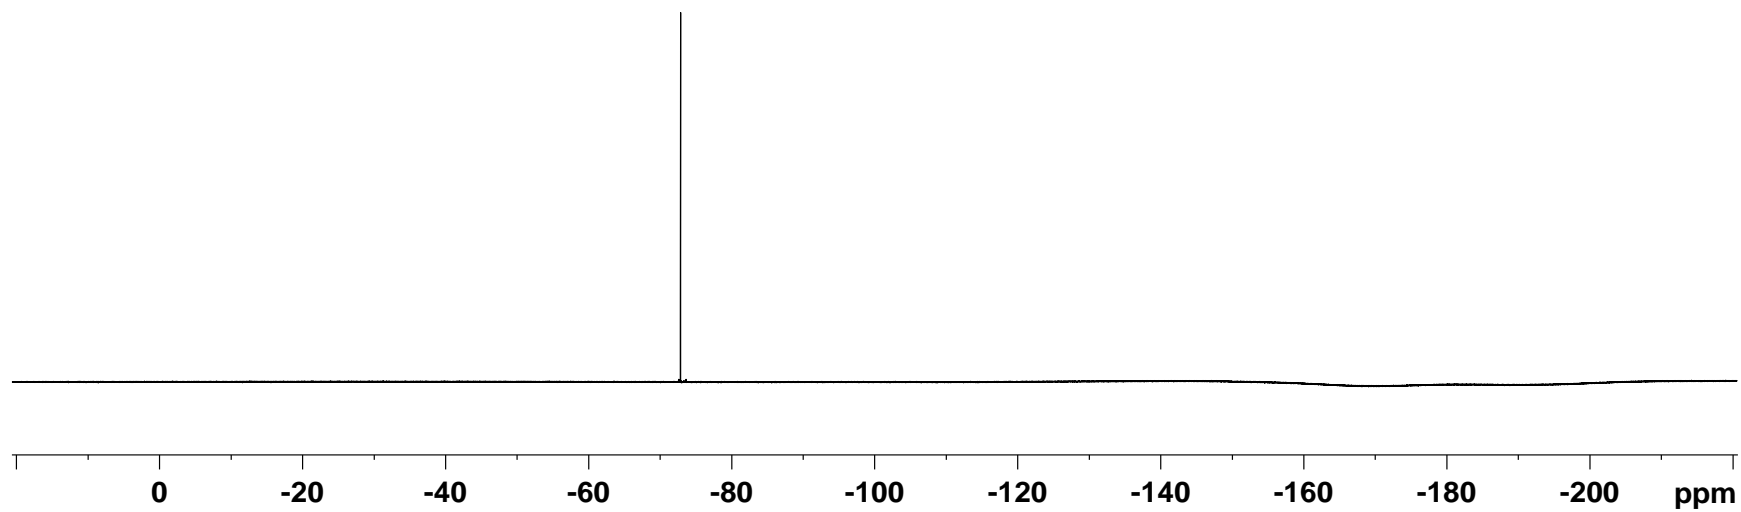

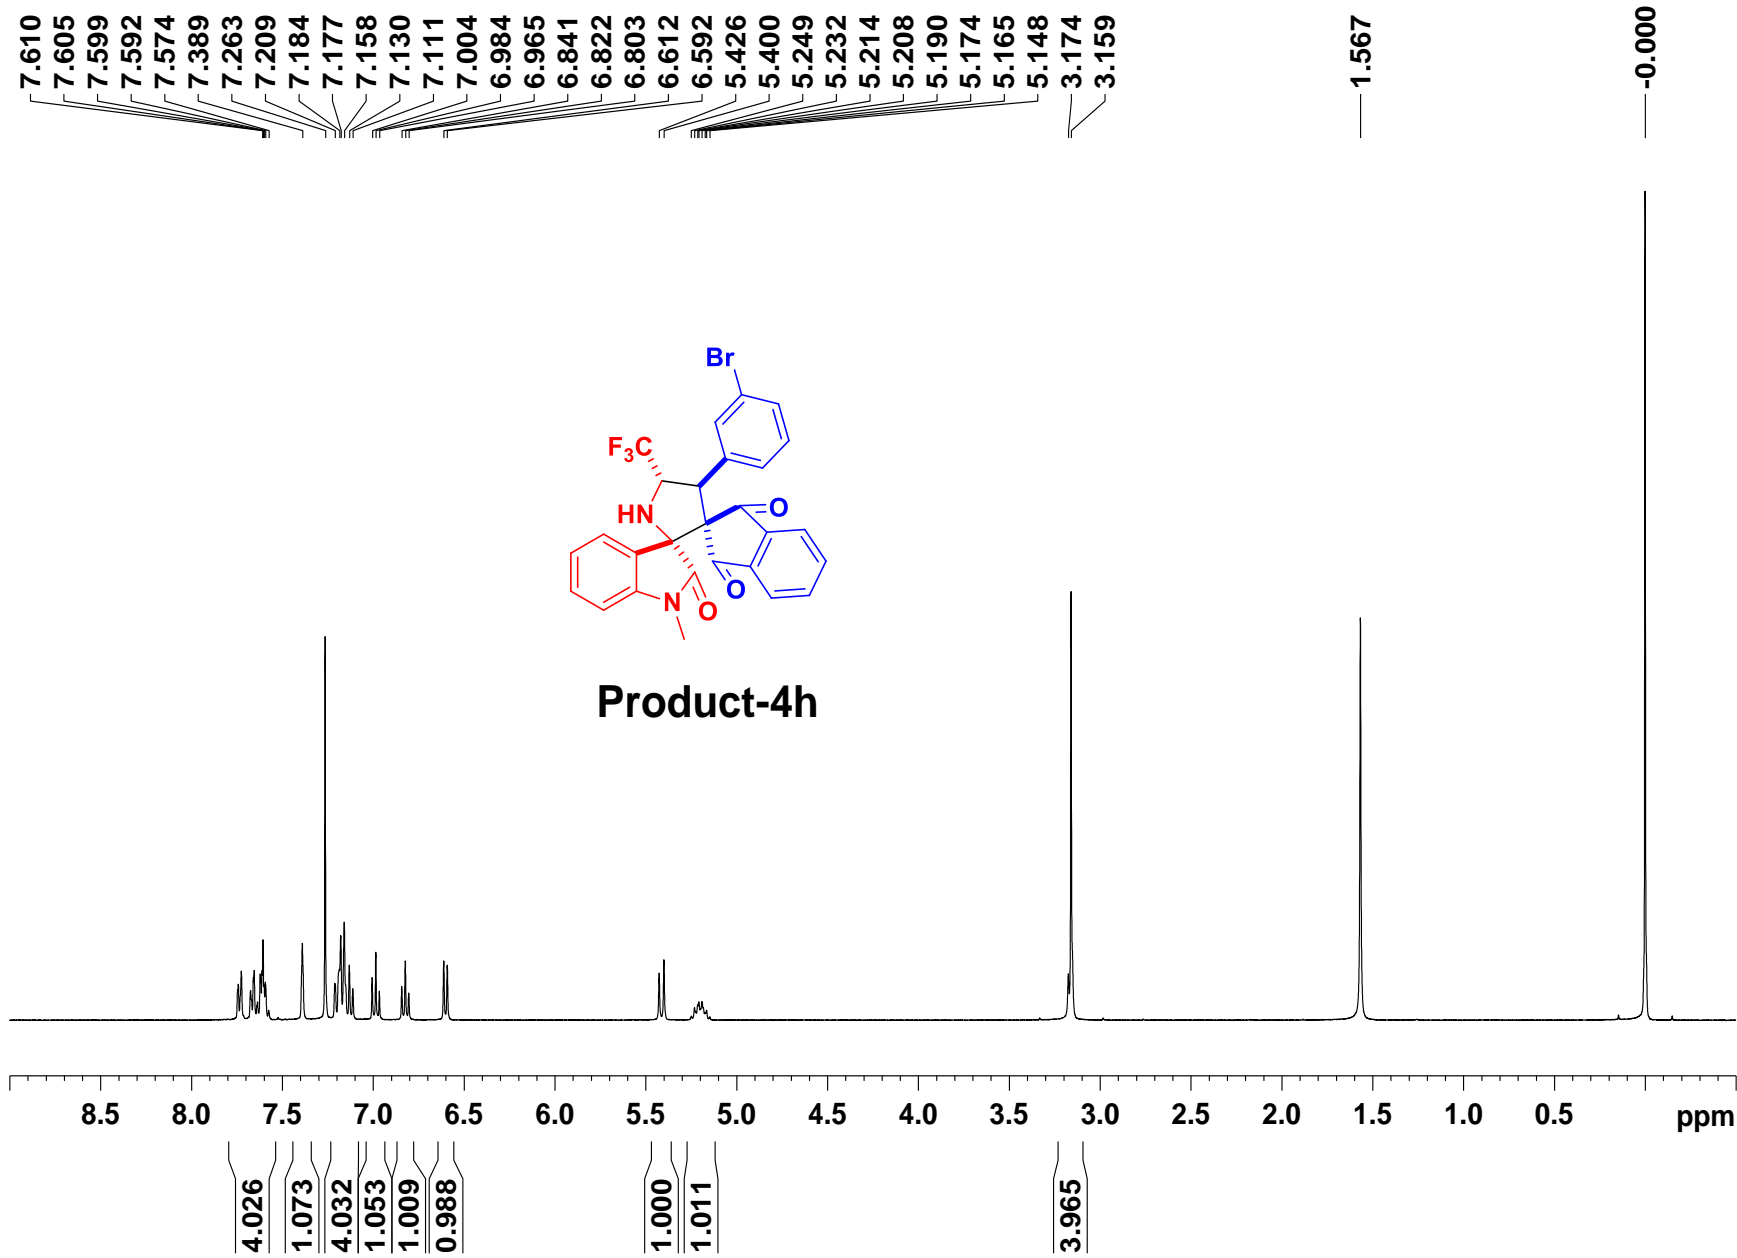



198.03  
194.84

174.97  
143.86  
141.91  
141.37  
135.93  
135.91  
134.88  
131.63  
130.96  
130.49  
129.82  
129.64  
127.27  
126.86  
124.53  
124.07  
122.90  
122.87  
122.72  
122.20  
122.10  
121.28  
108.14  
77.31  
76.99  
76.68  
70.68  
70.50  
61.35  
61.05  
60.74  
60.43  
48.48  
40.49  
40.27  
40.07  
39.86  
39.65  
39.44  
39.23  
26.12

-0.22

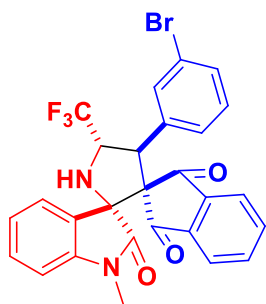

Product-4h

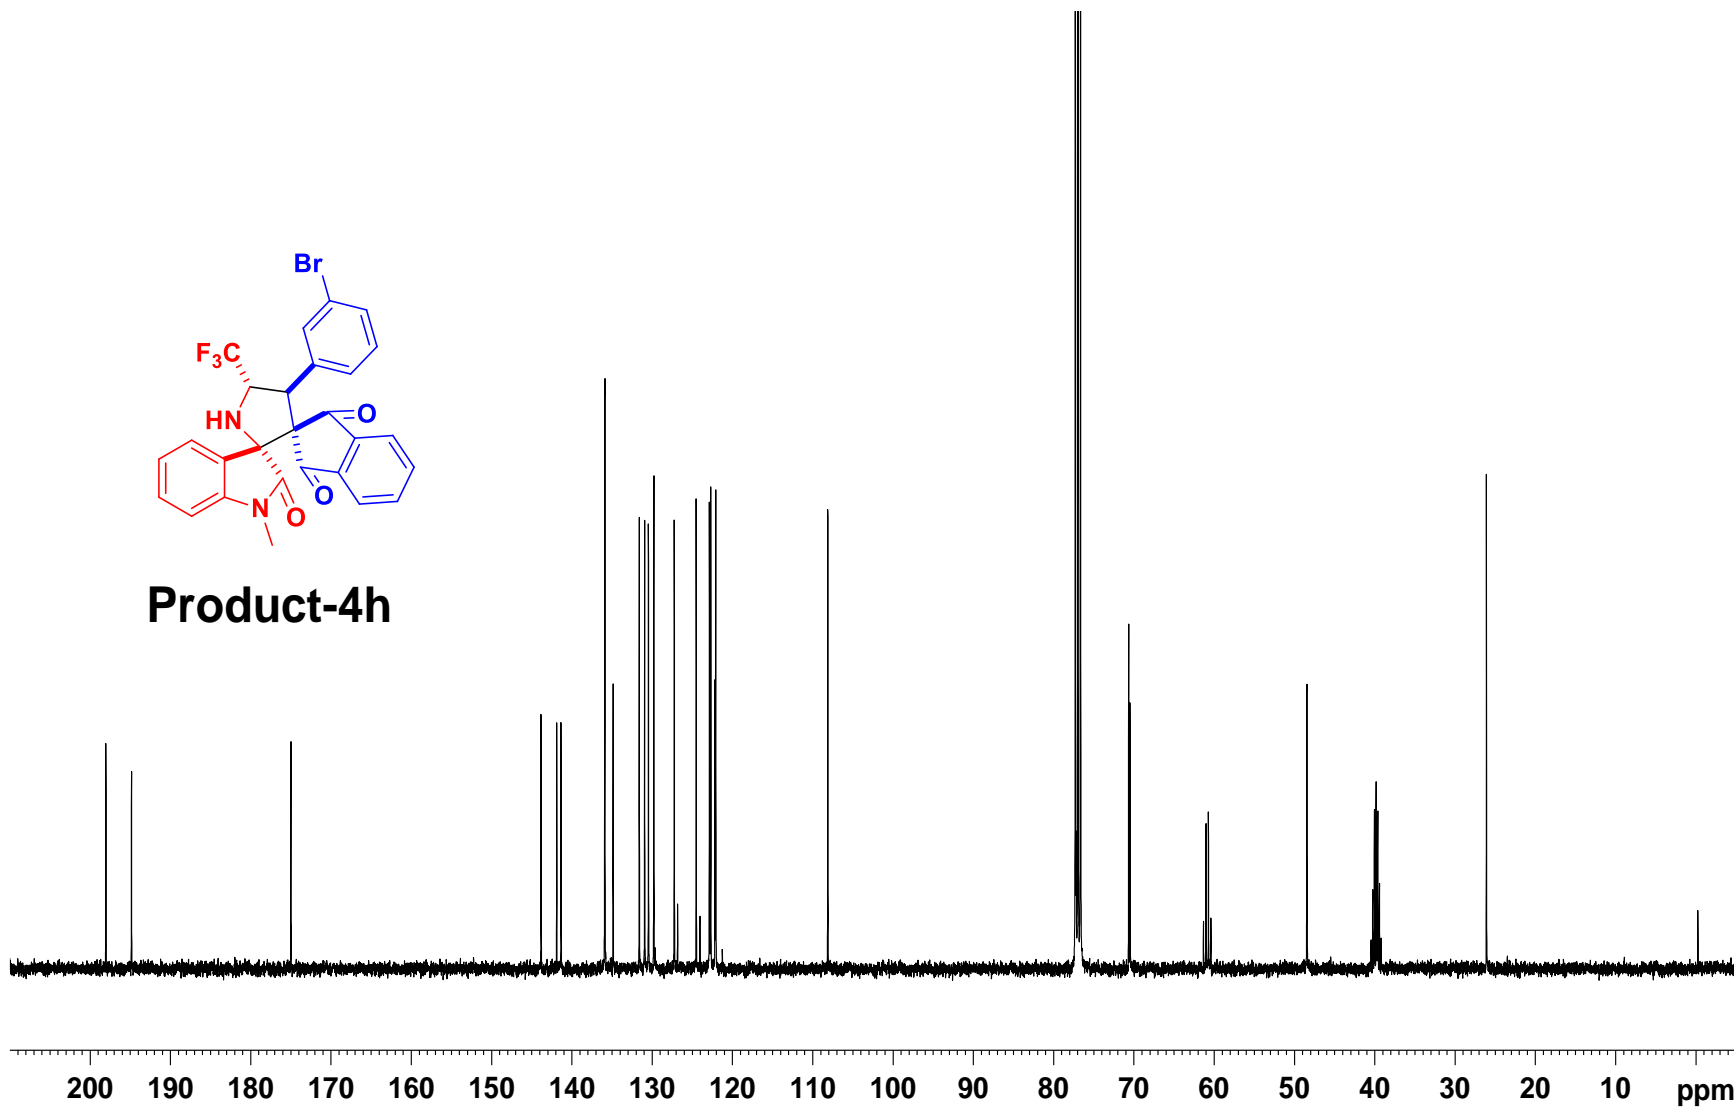

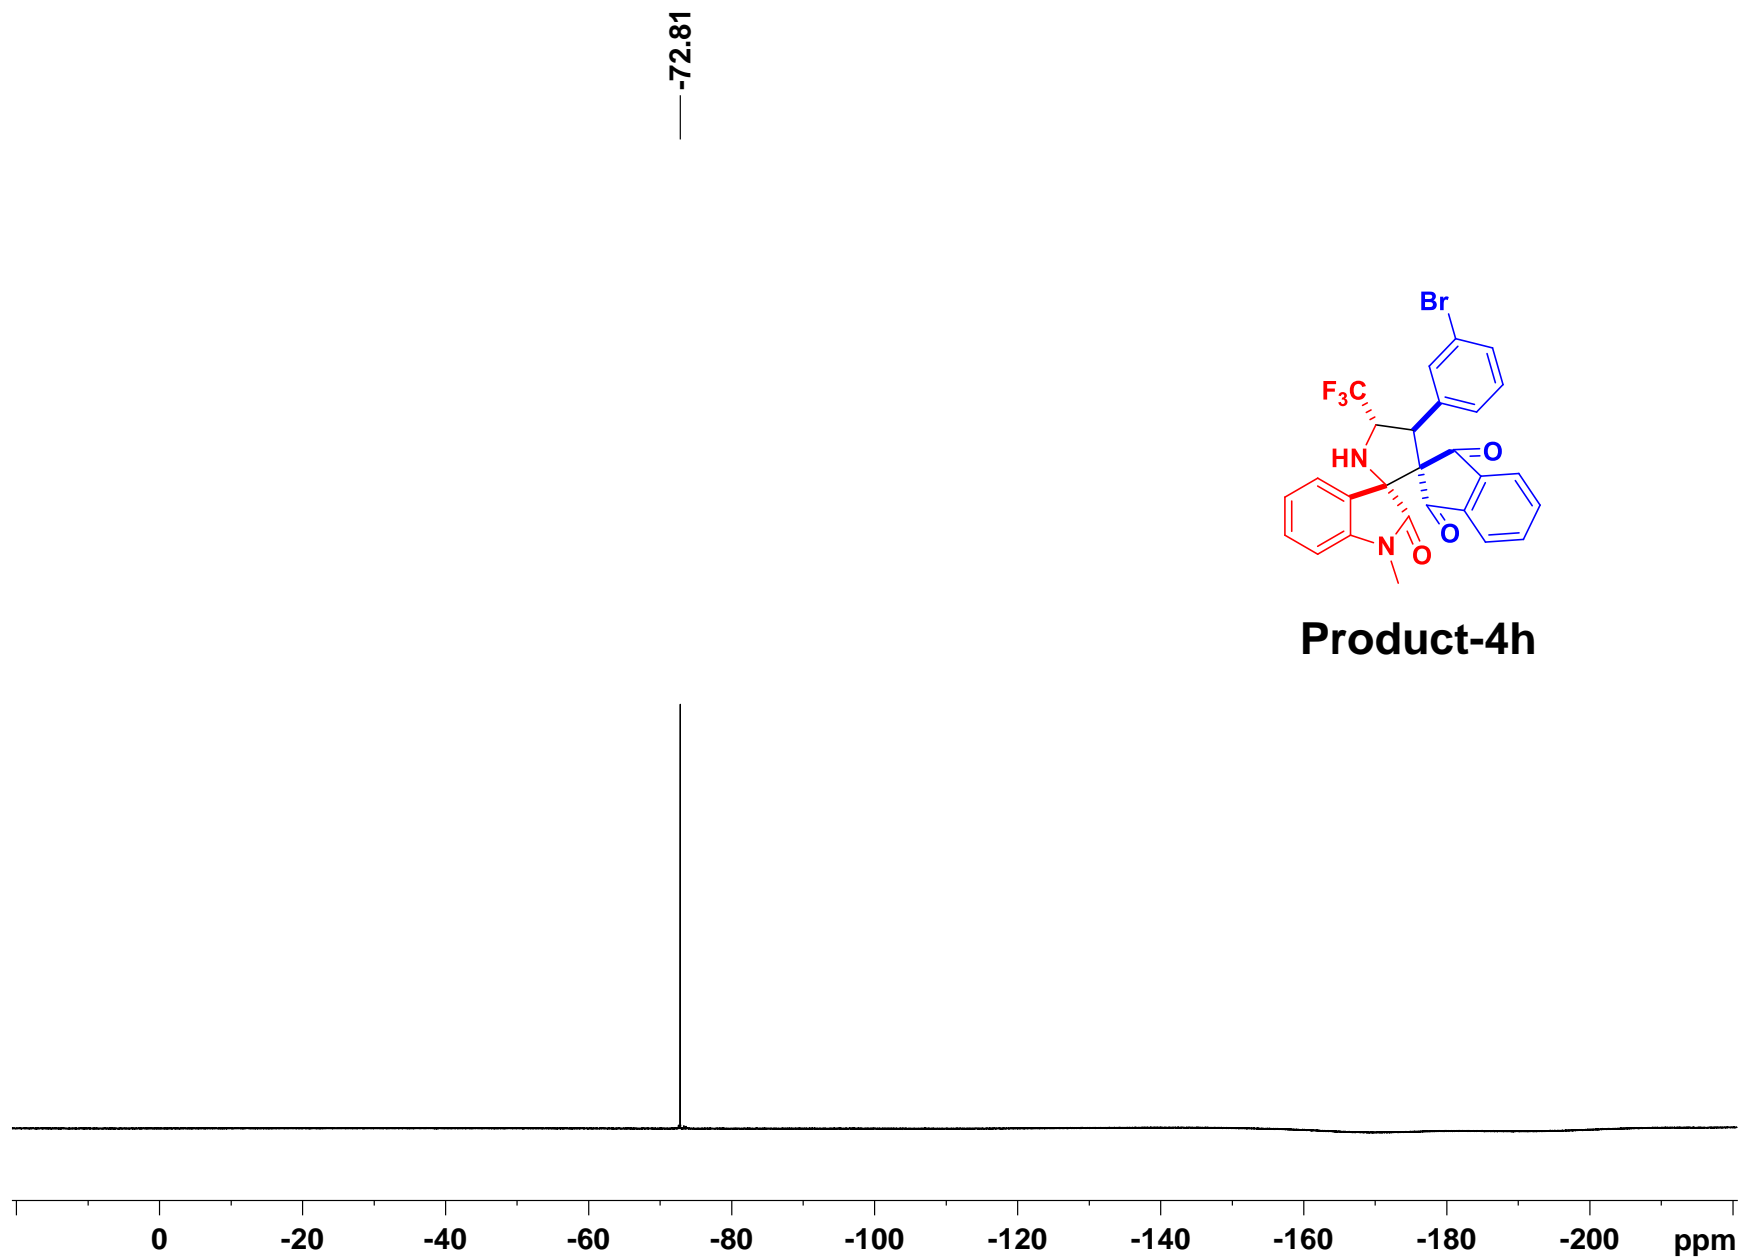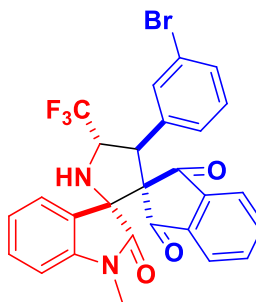

**Product-4h**

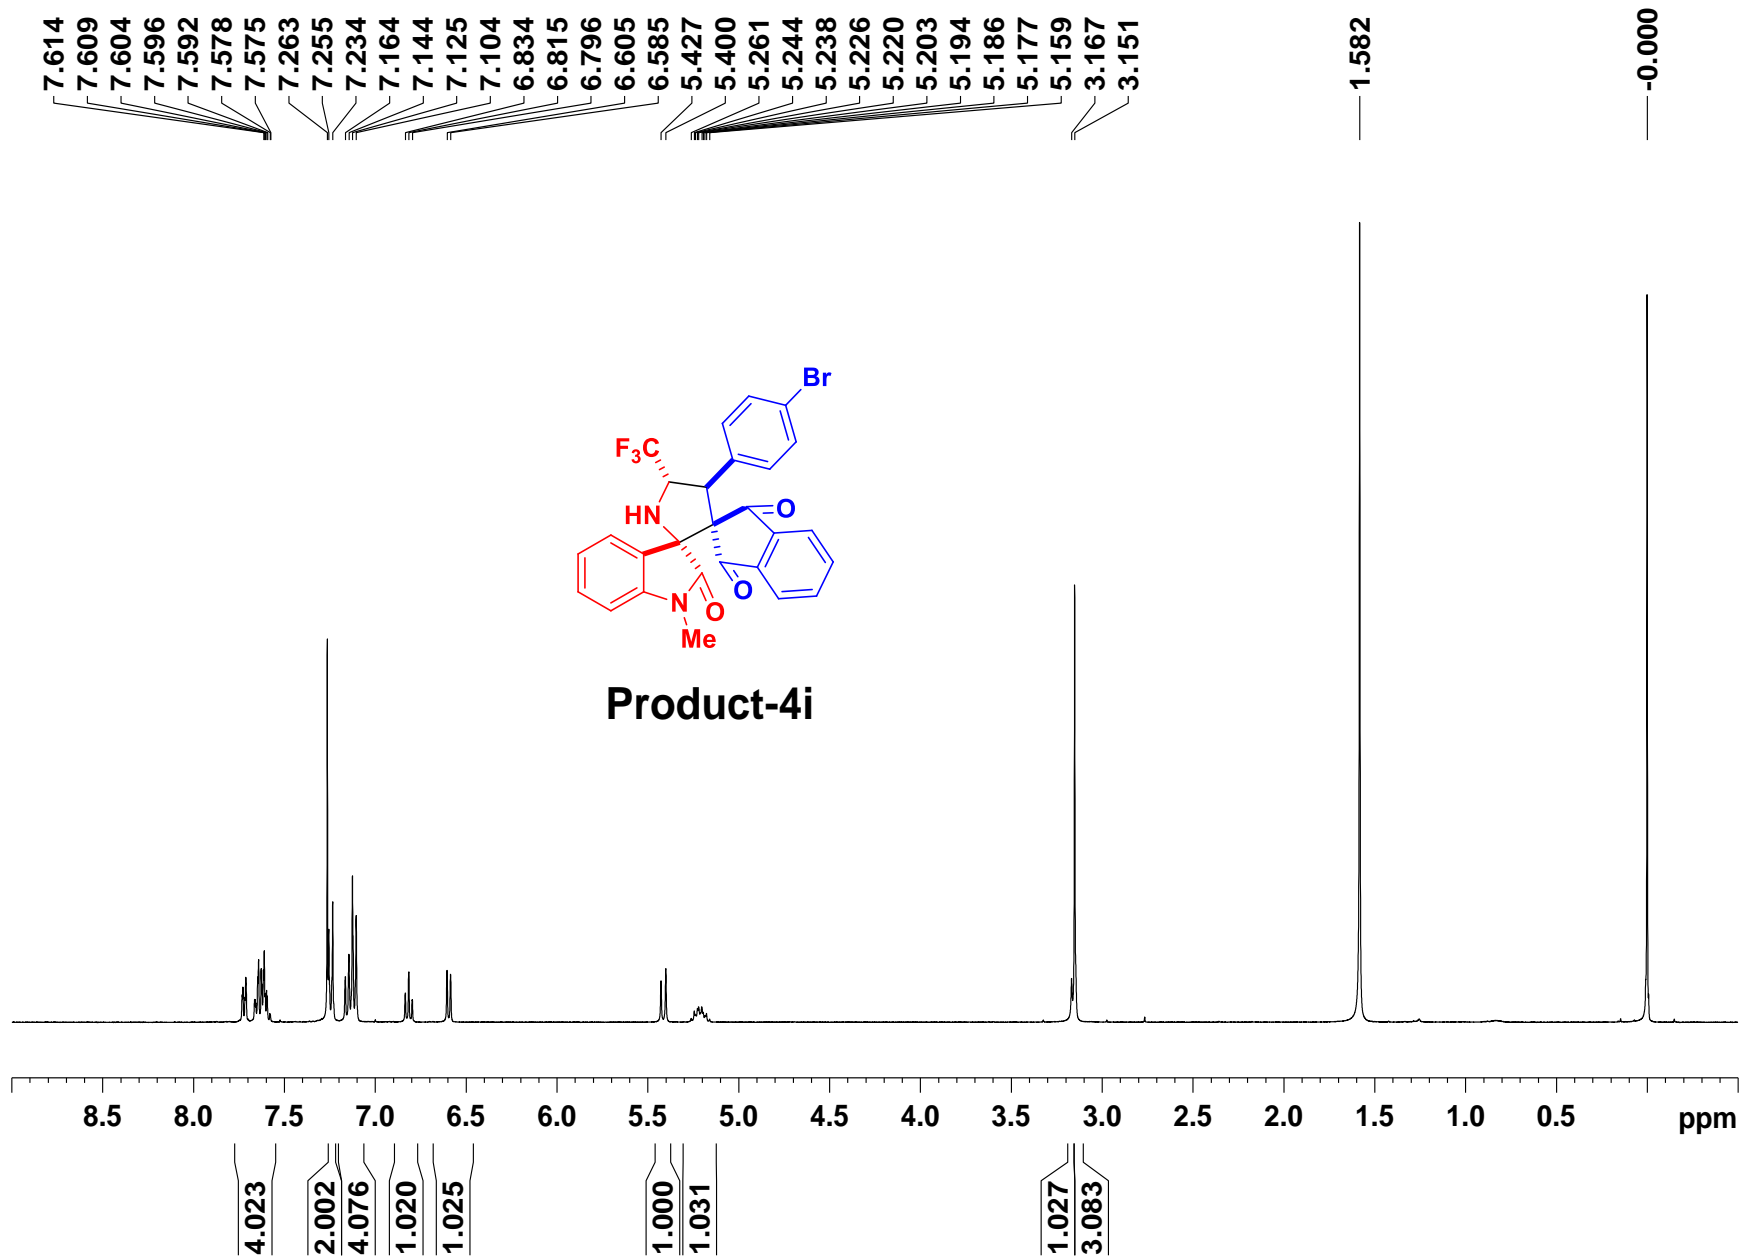

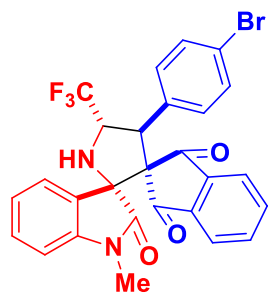

**Product-4i**

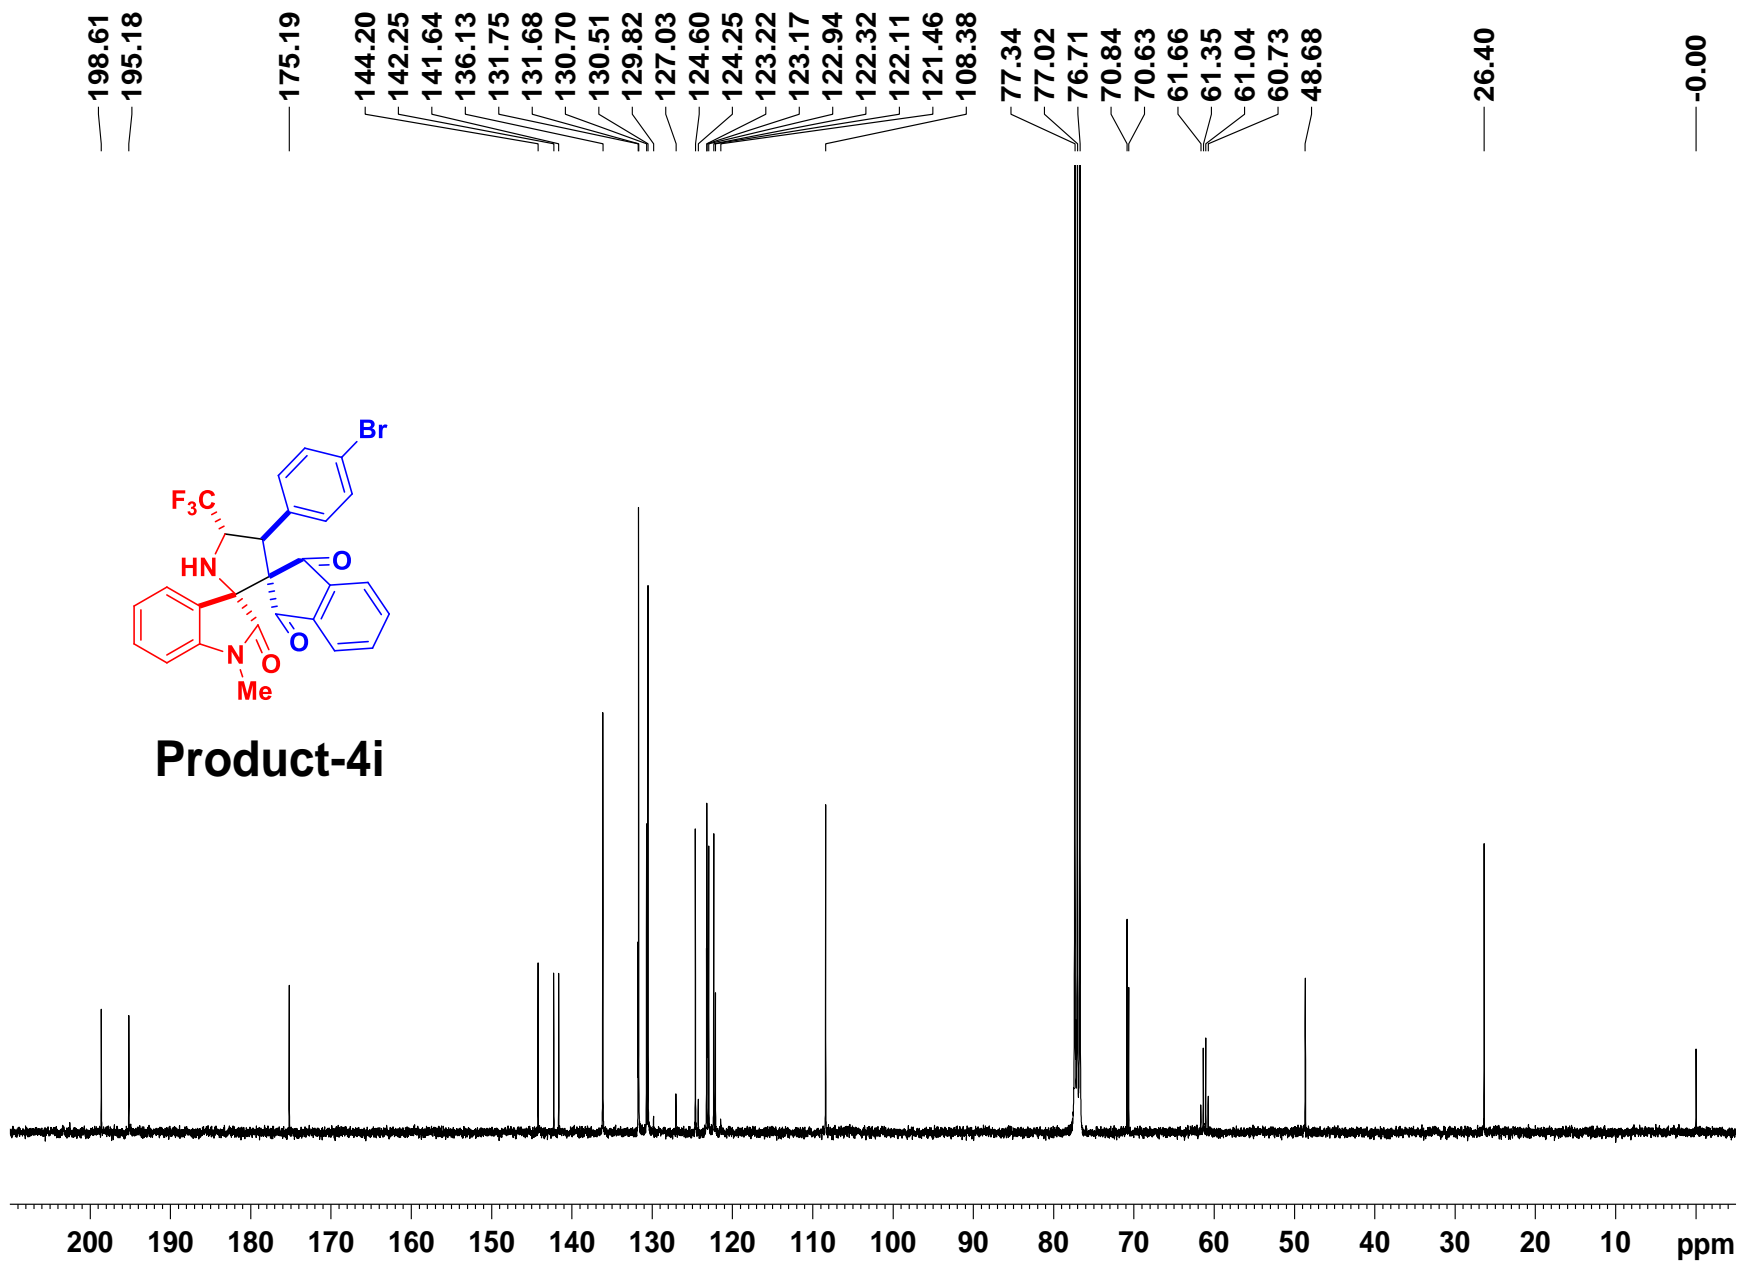

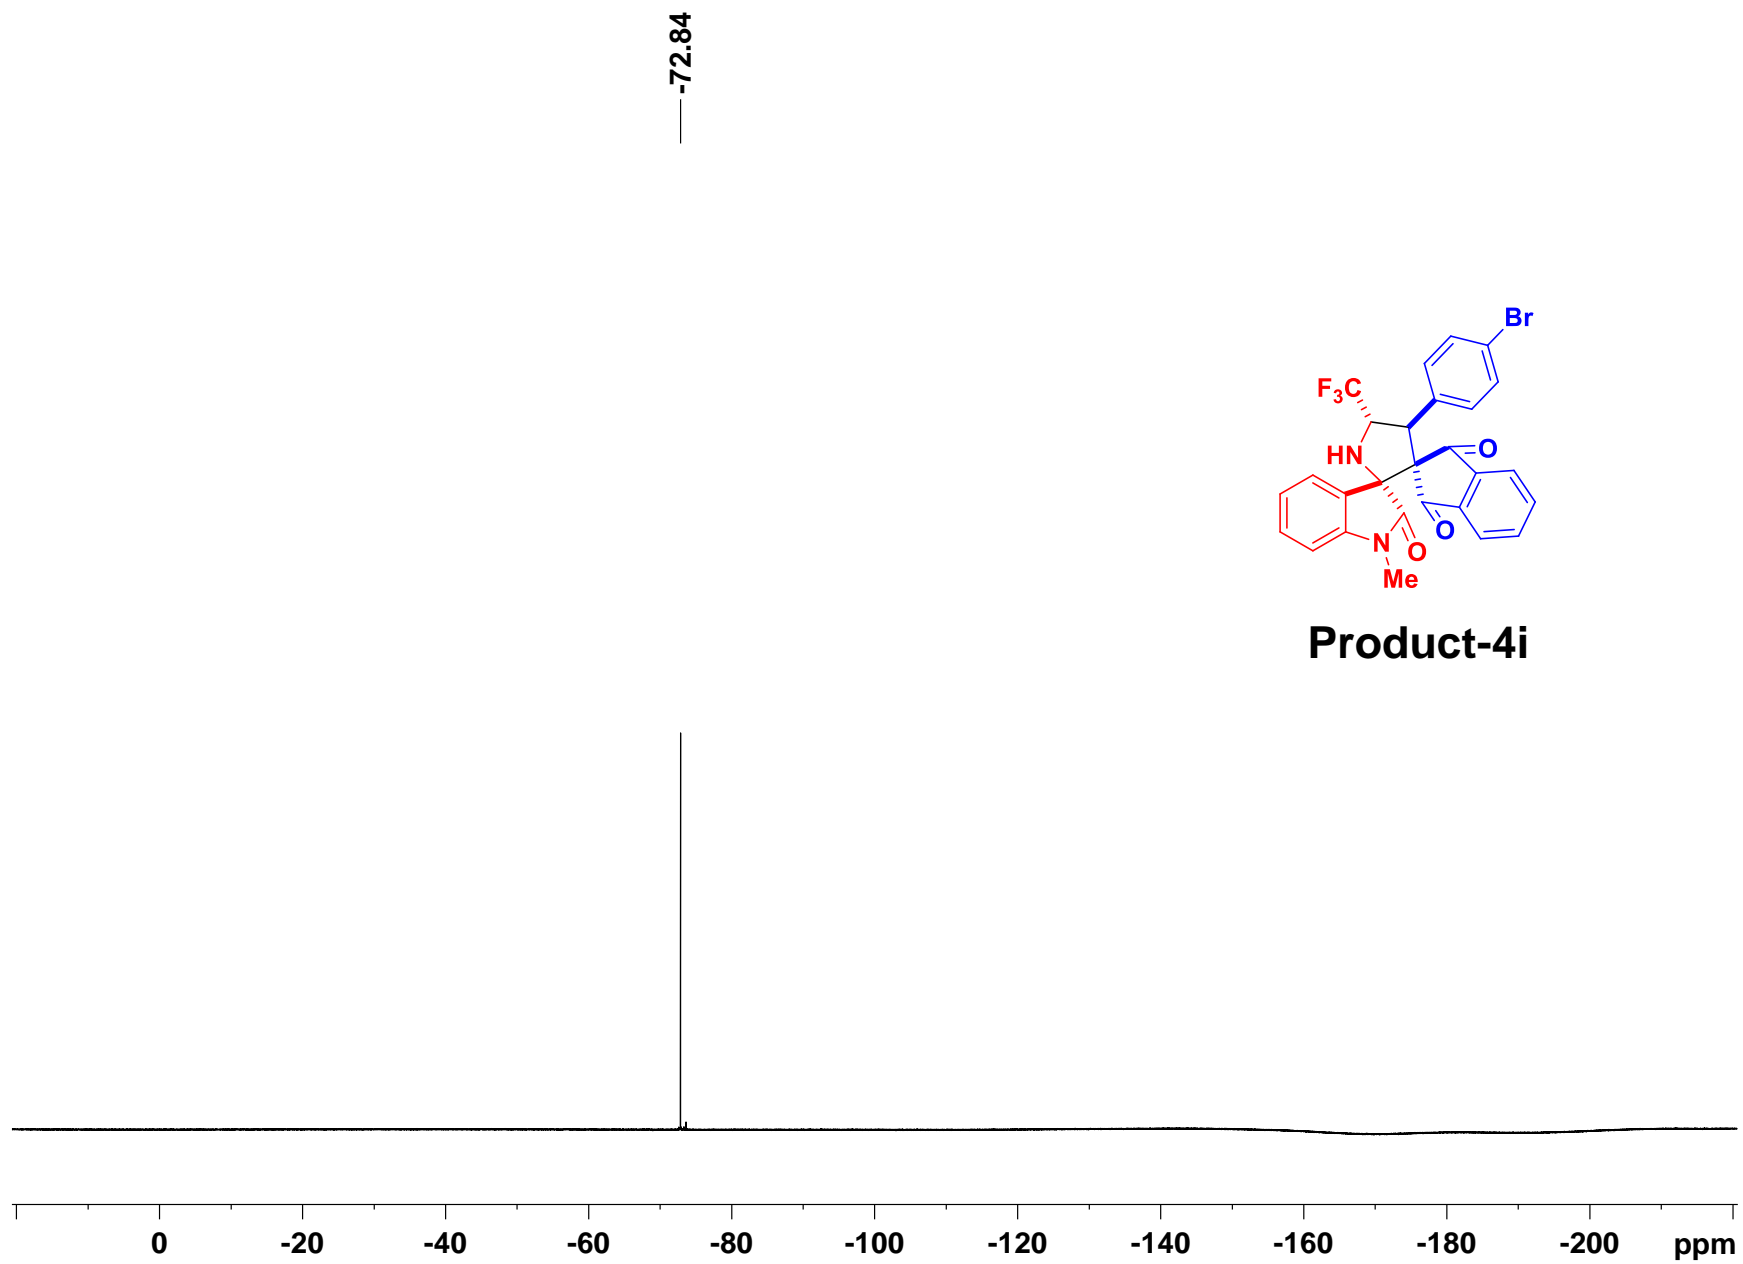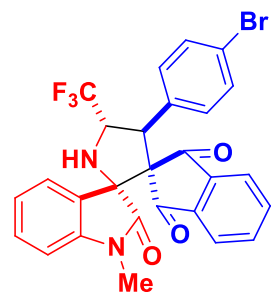

**Product-4i**

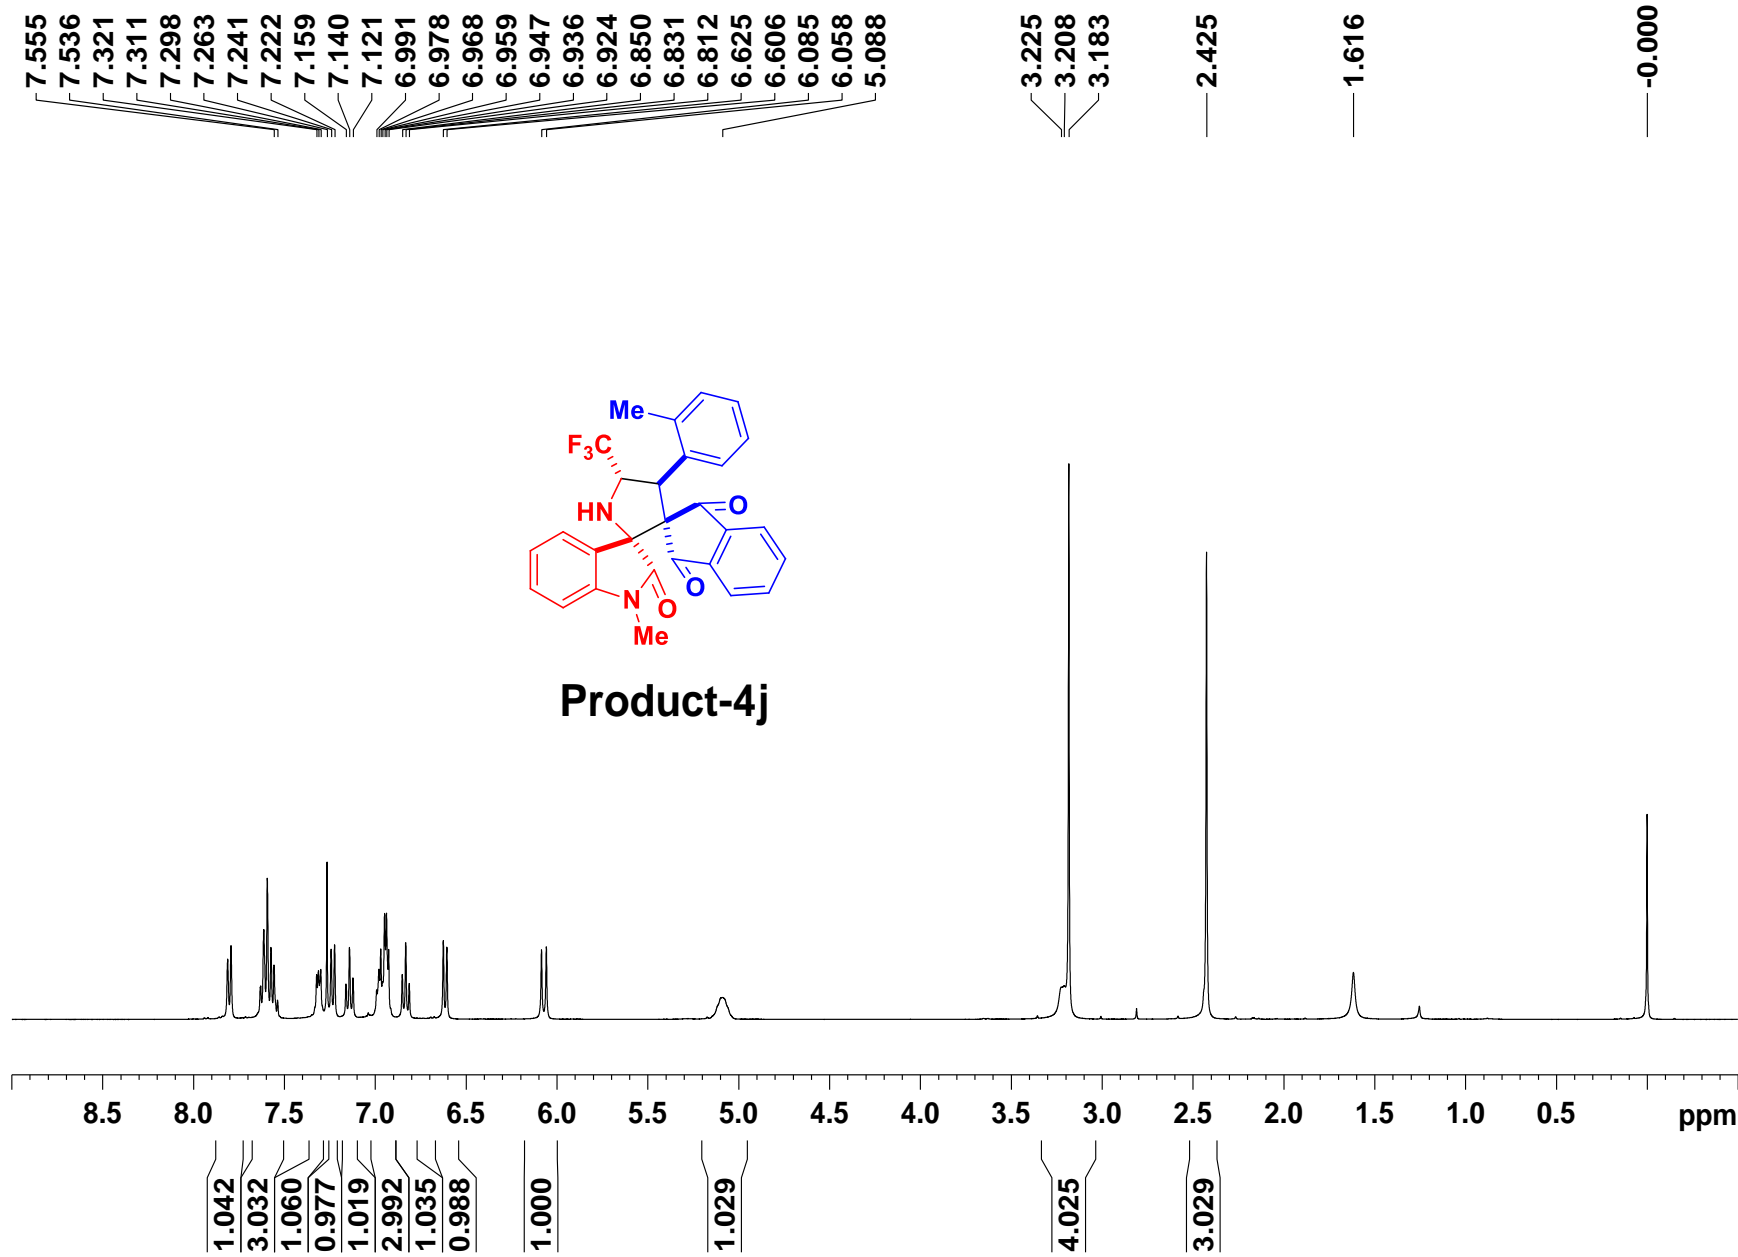

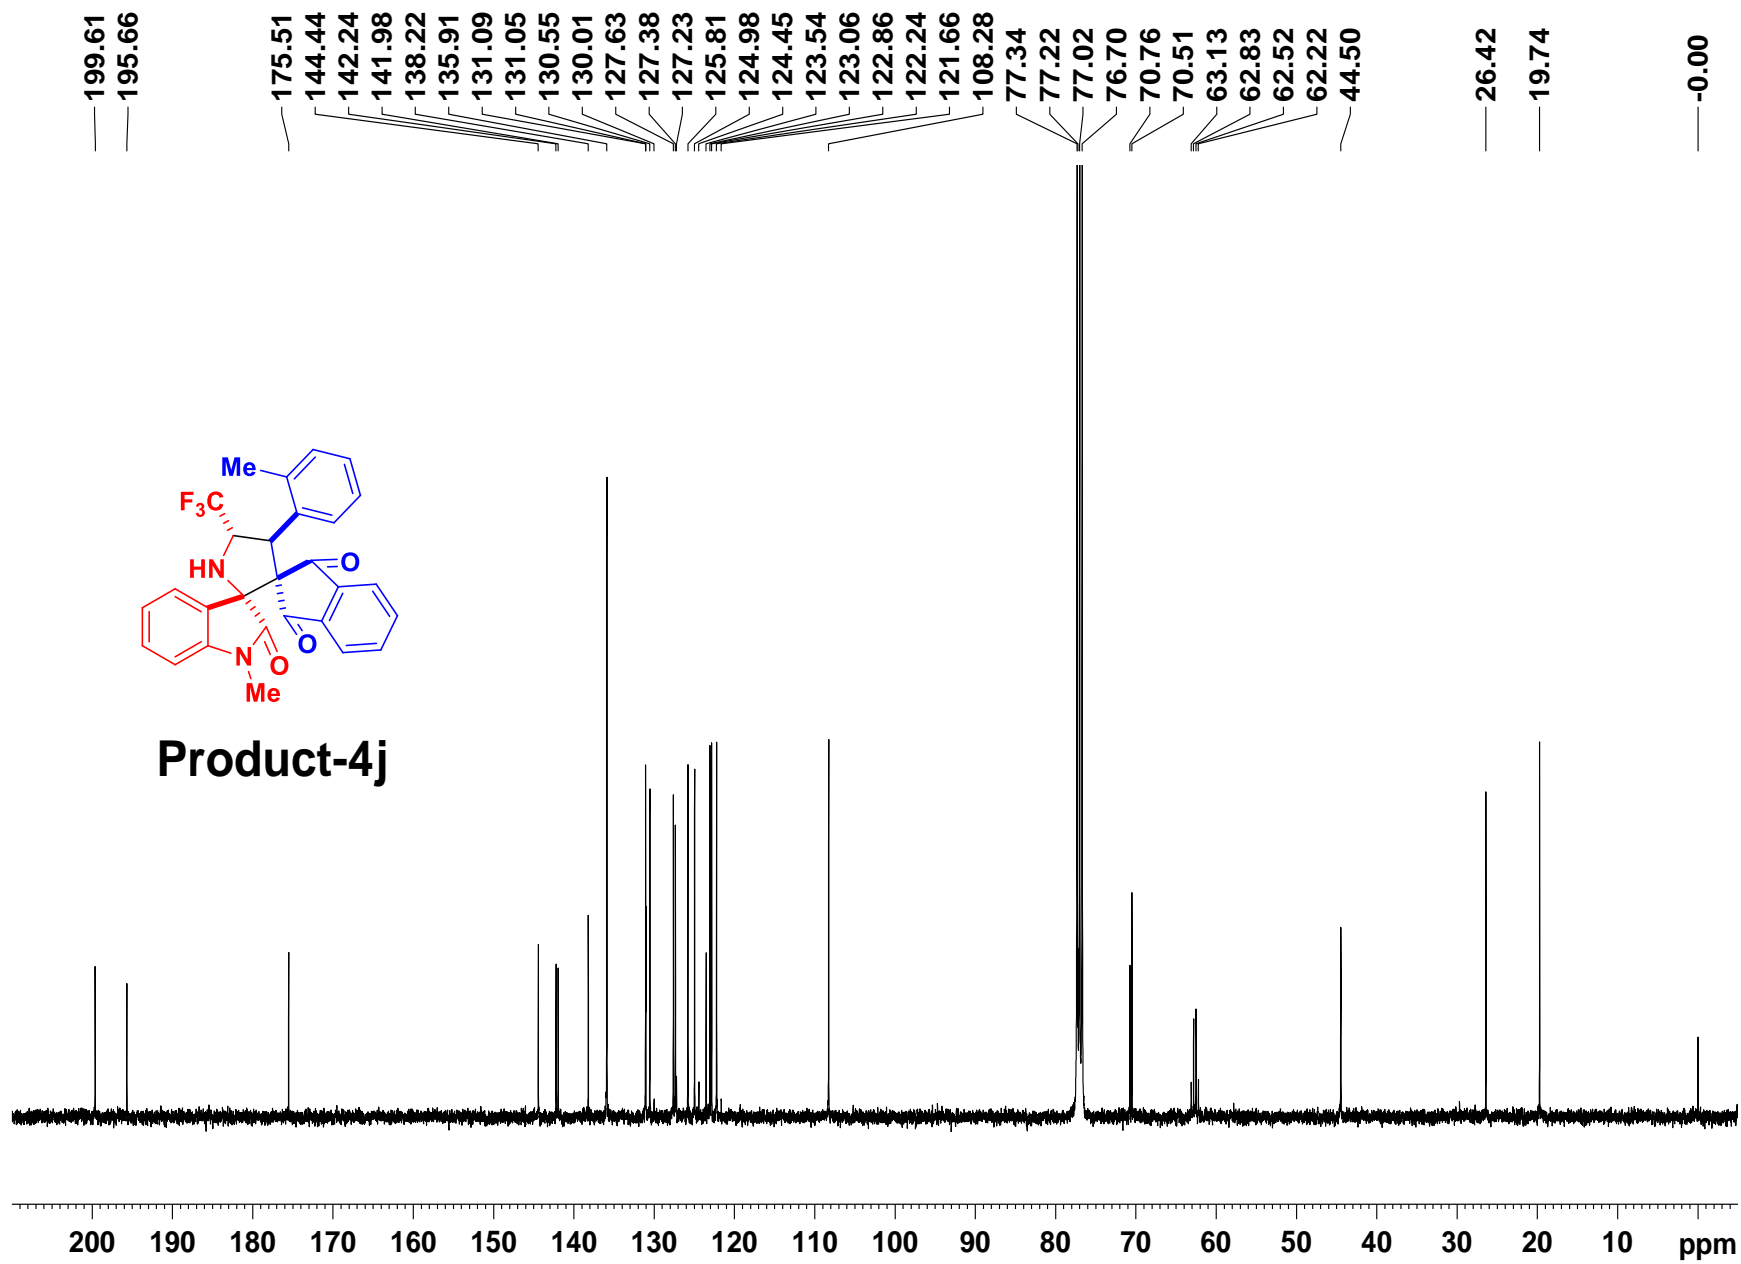

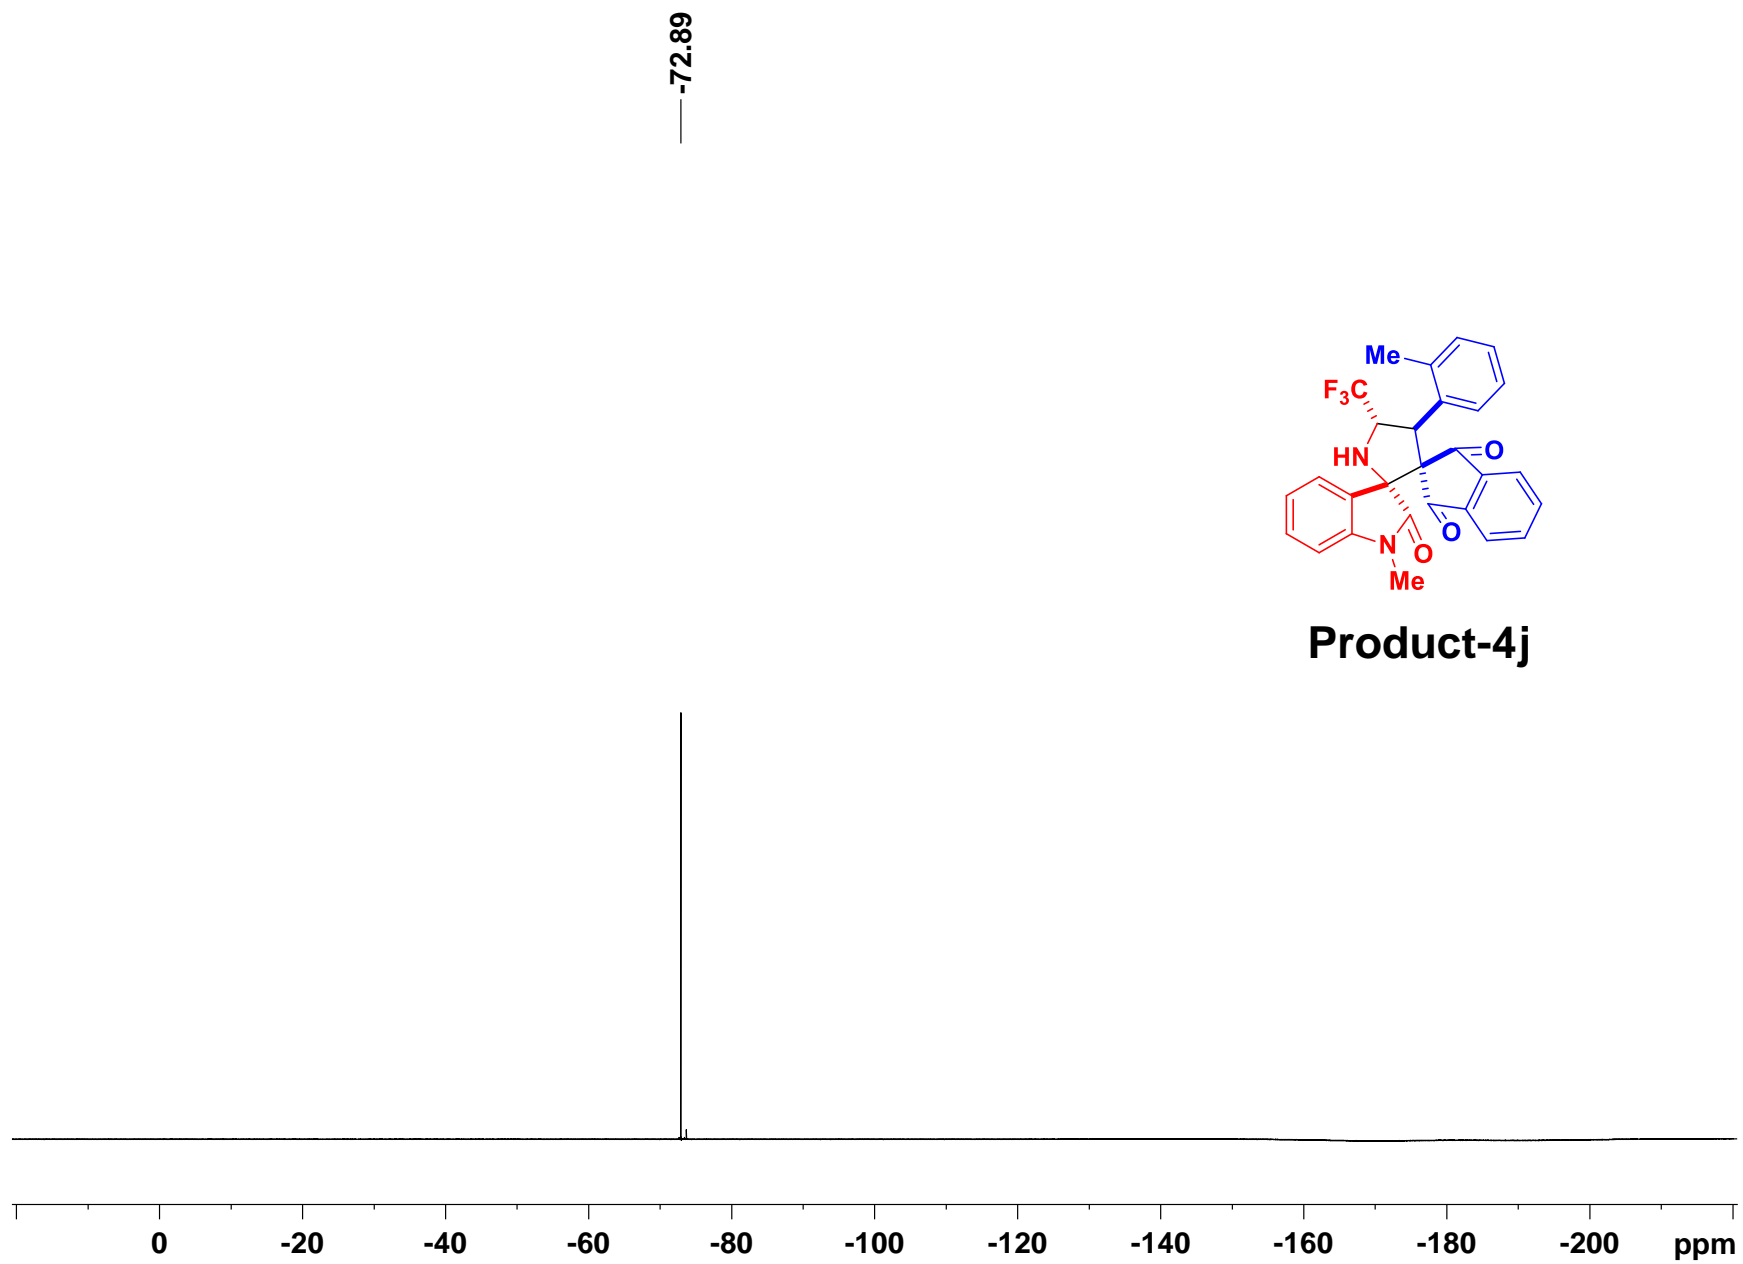



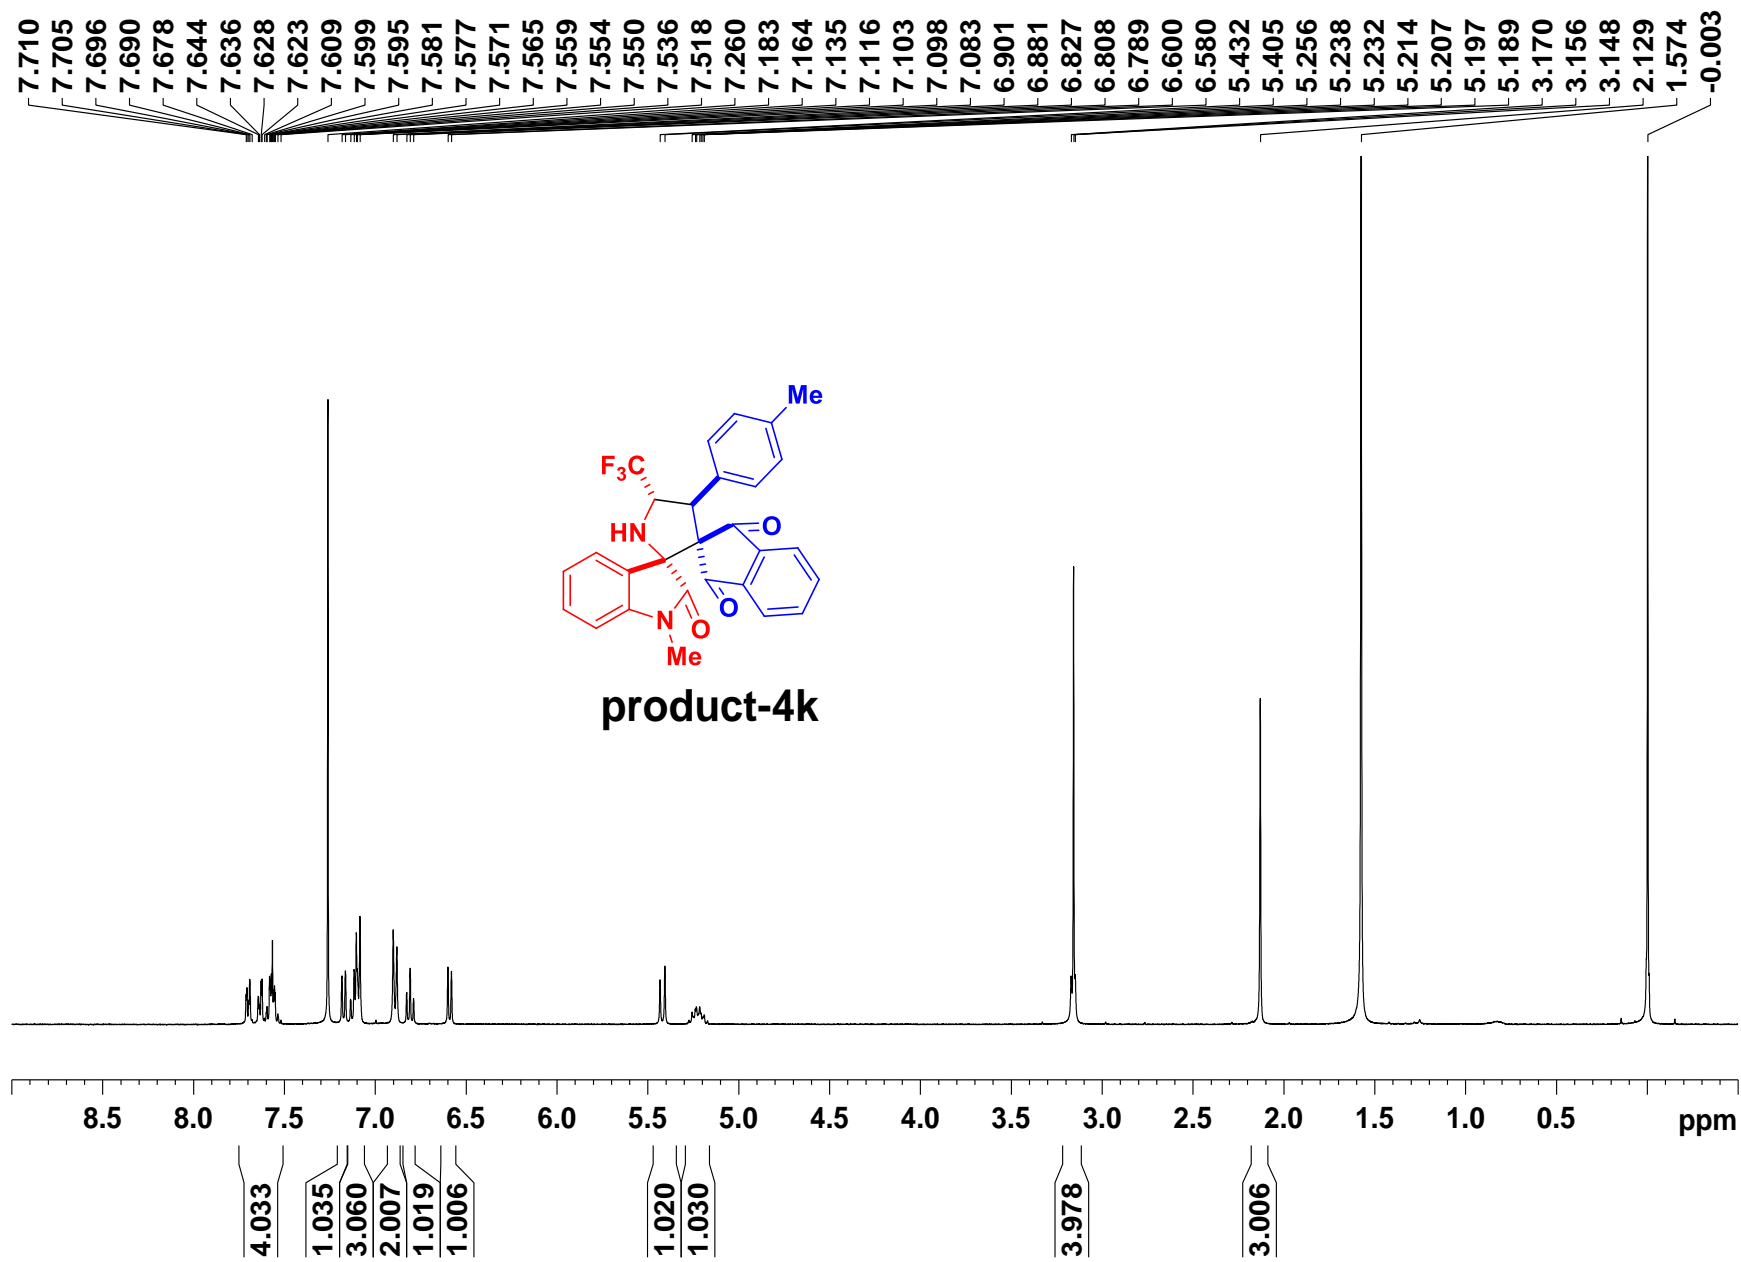

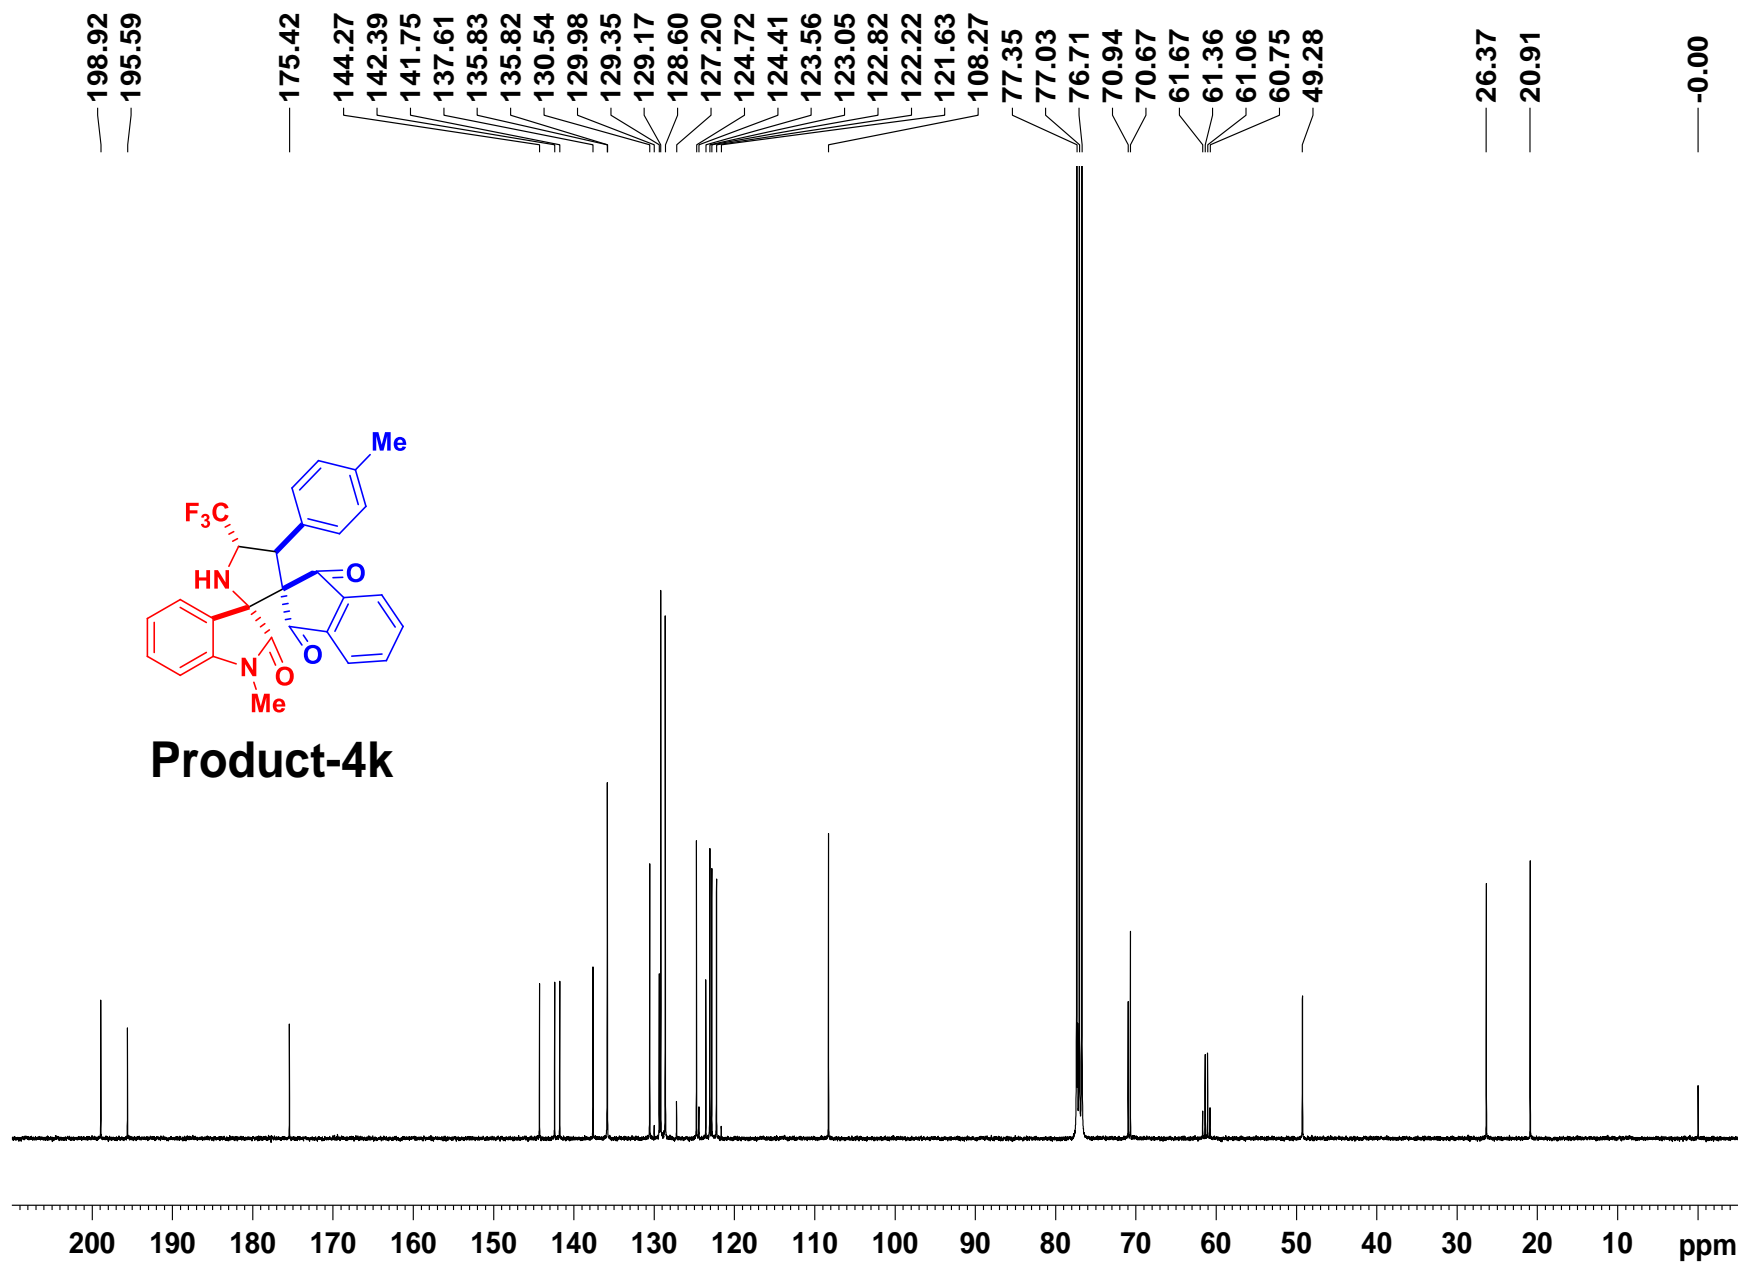

—72.73

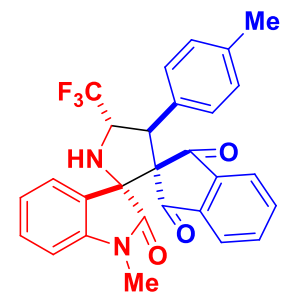

**Product-4k**

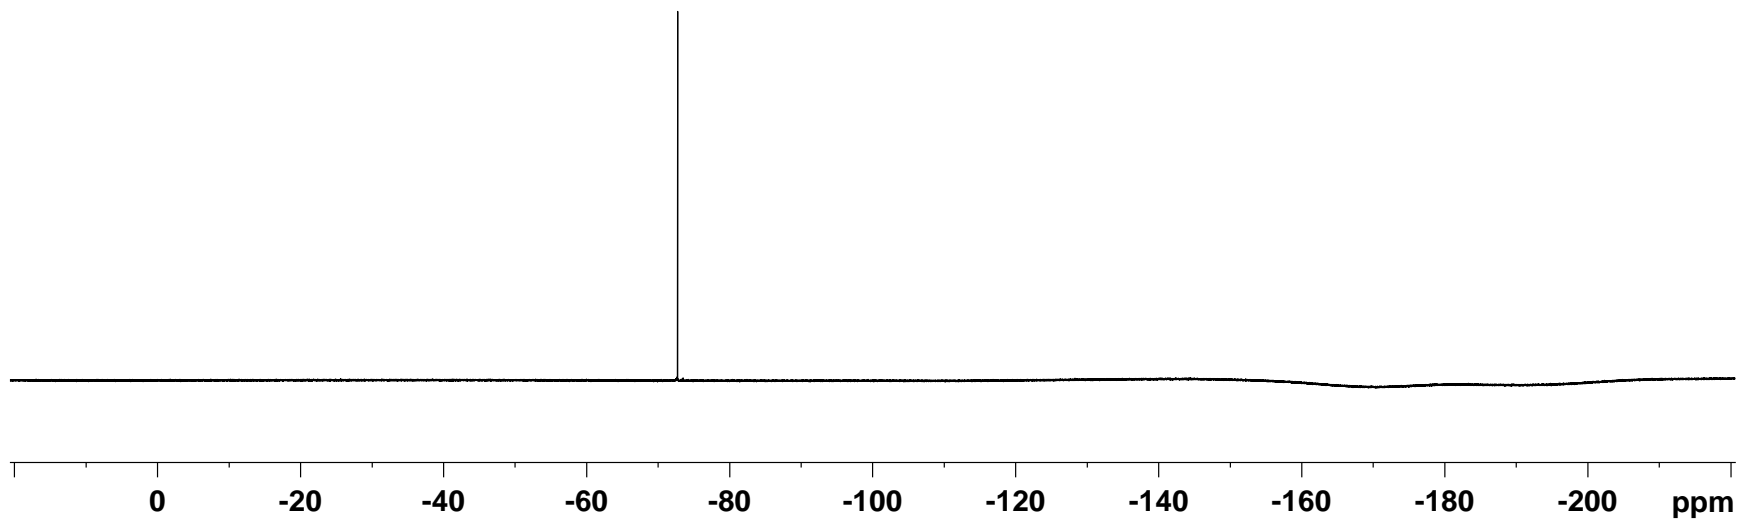

S51

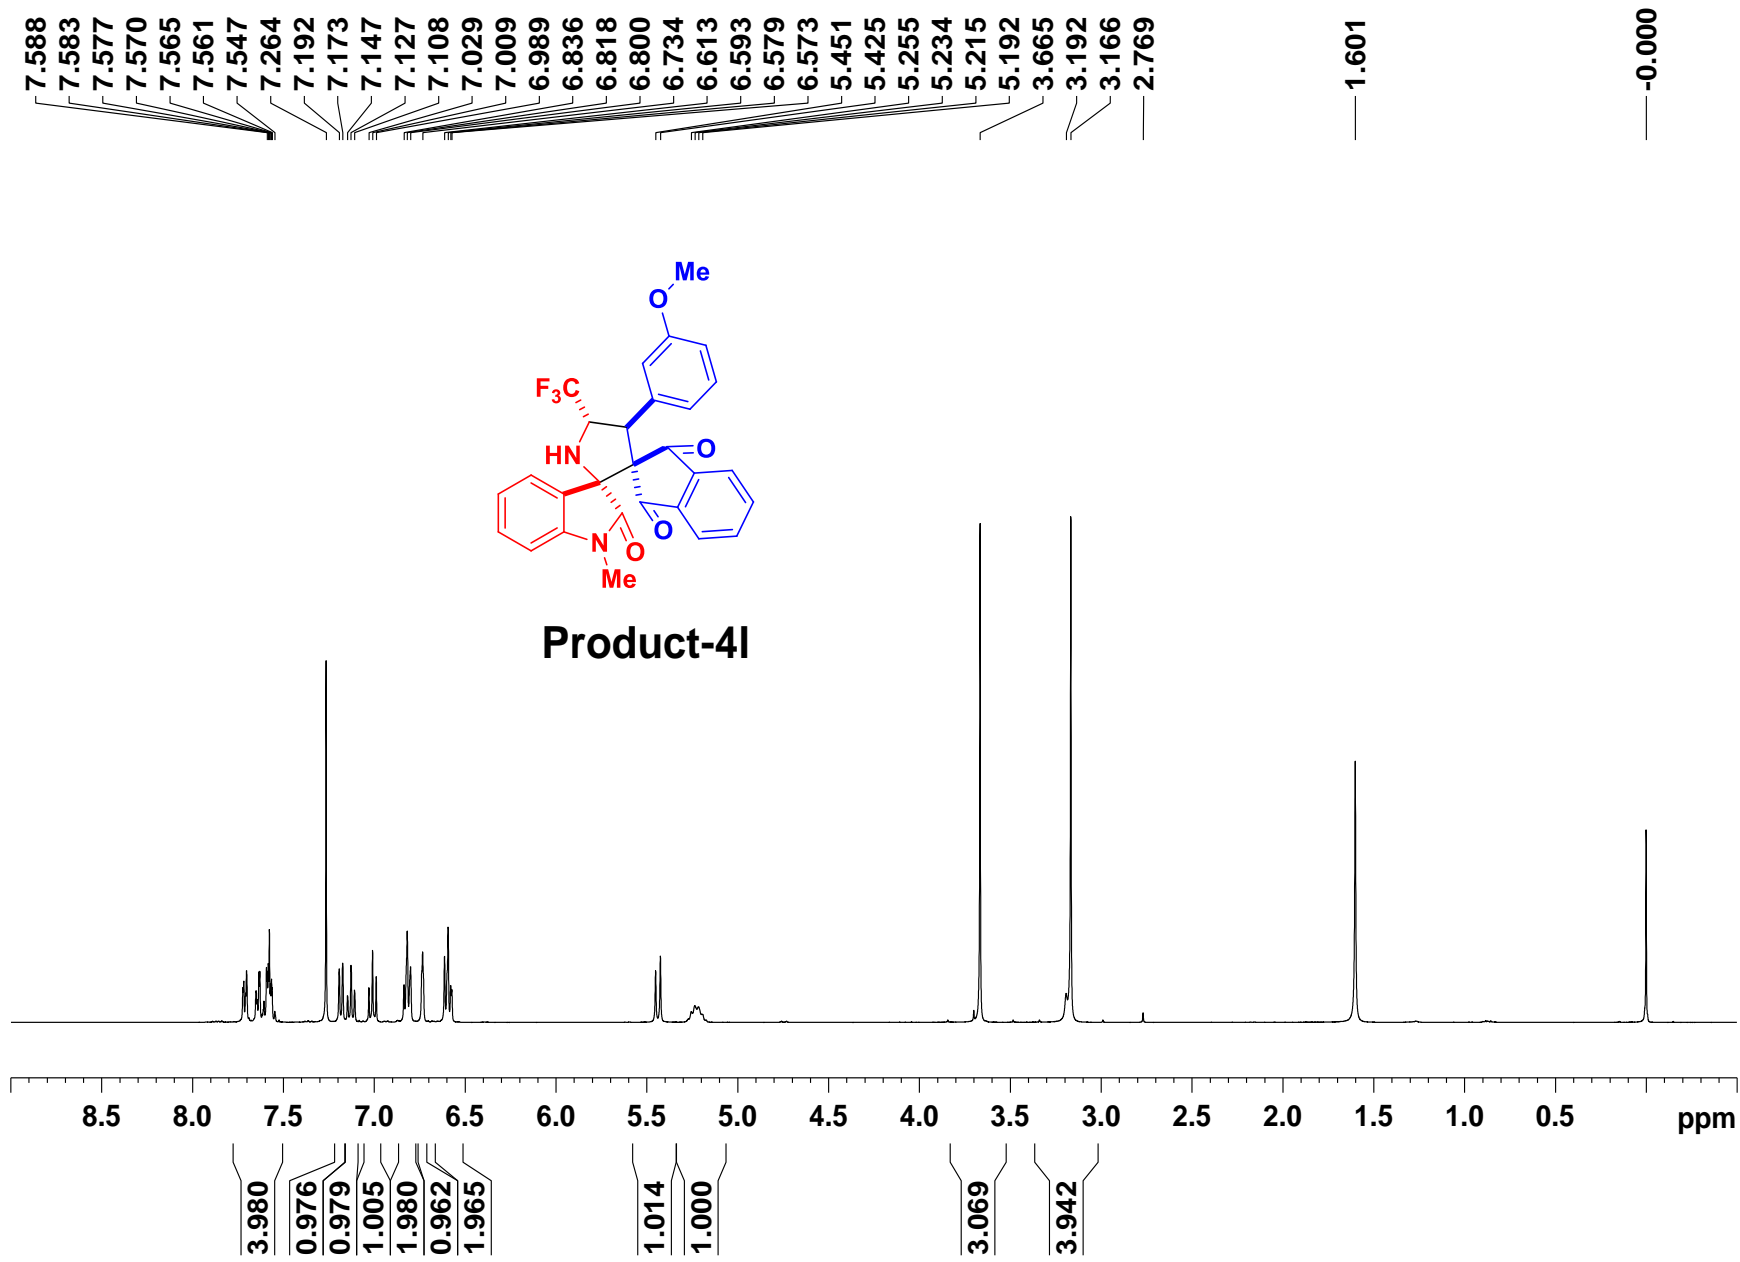

198.77  
195.56

175.43  
159.30  
144.30  
142.38  
141.73  
135.91  
134.05  
130.60  
129.95  
129.45  
127.17  
124.80  
124.38  
123.50  
123.05  
122.88  
122.29  
121.60  
120.92  
114.22  
113.96  
108.32  
77.37  
77.05  
76.73  
70.88  
70.62  
61.68  
61.37  
61.06  
60.76  
55.13  
49.72

26.38

0.01

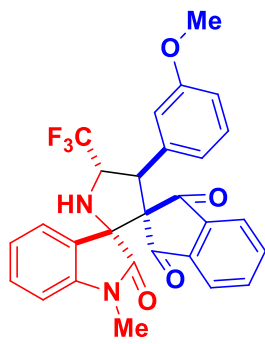

**Product-4I**

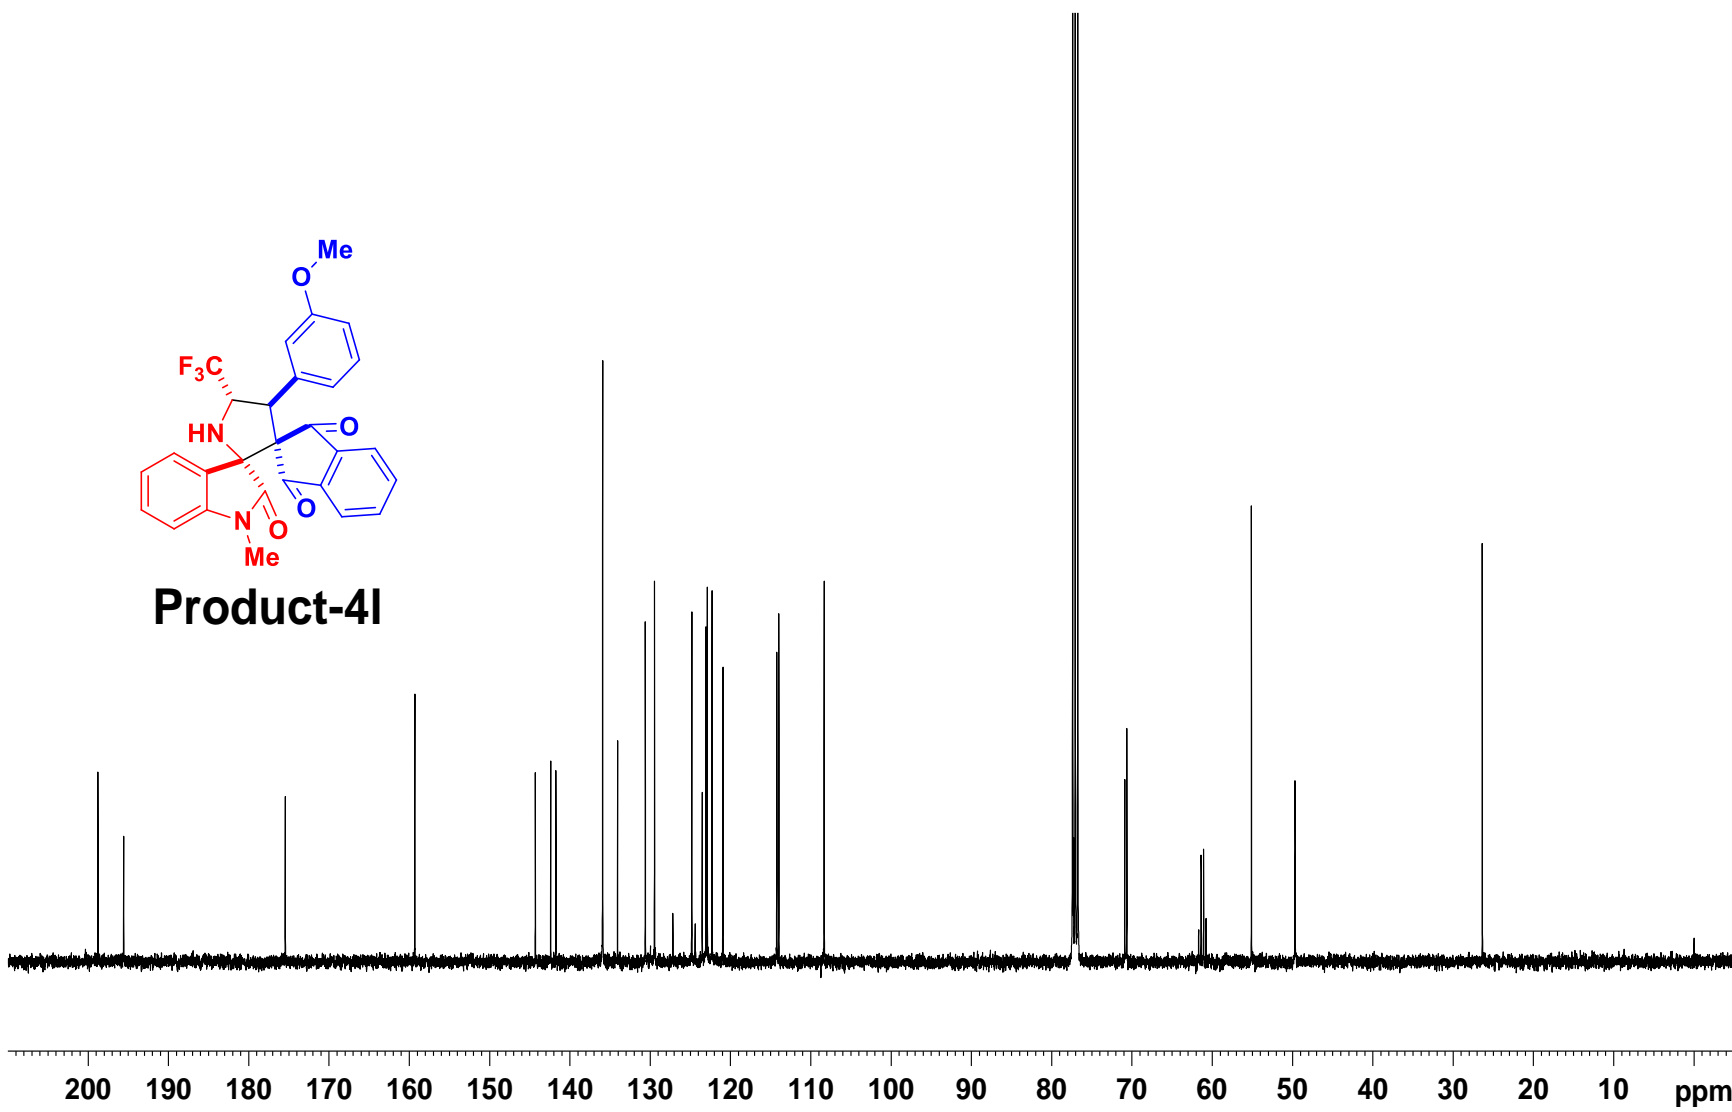

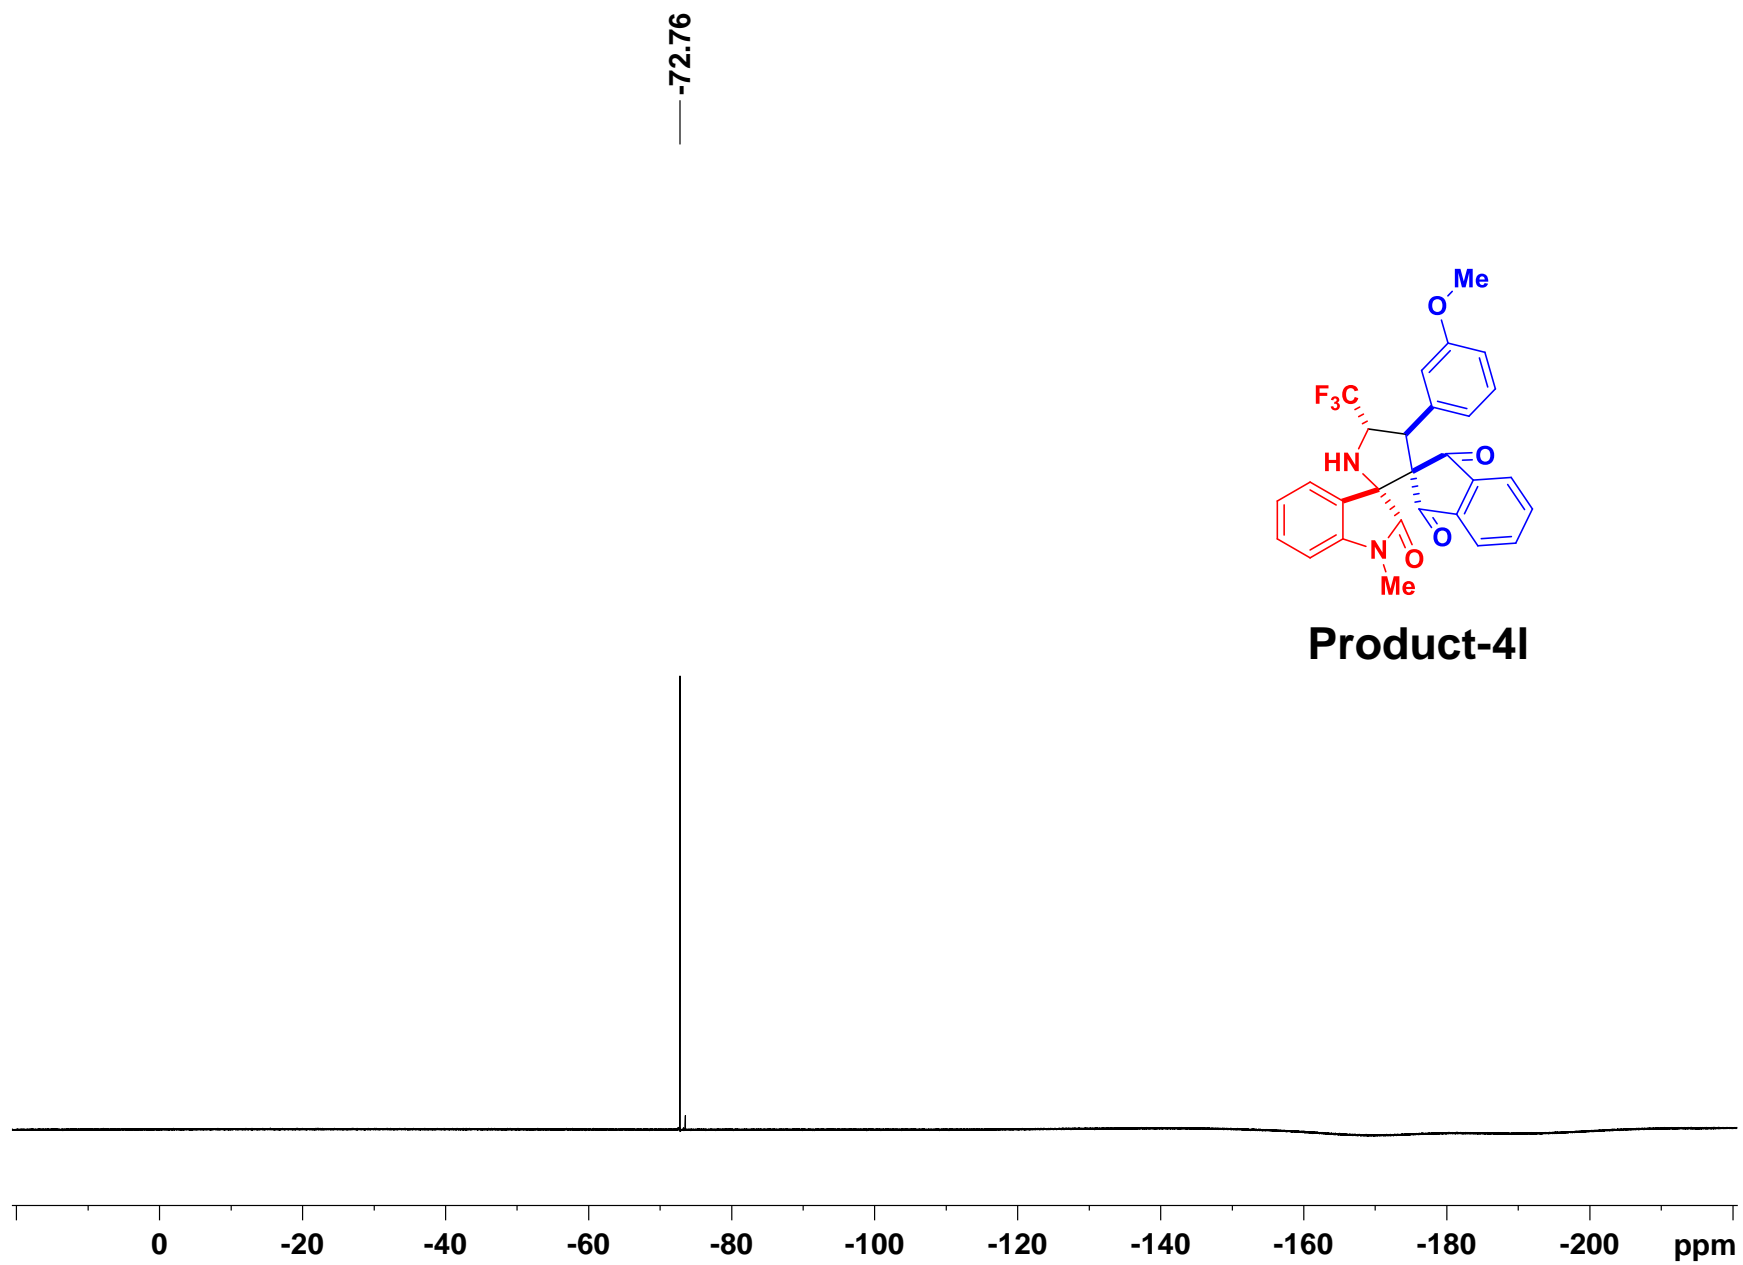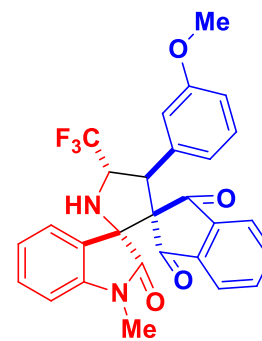

**Product-4I**

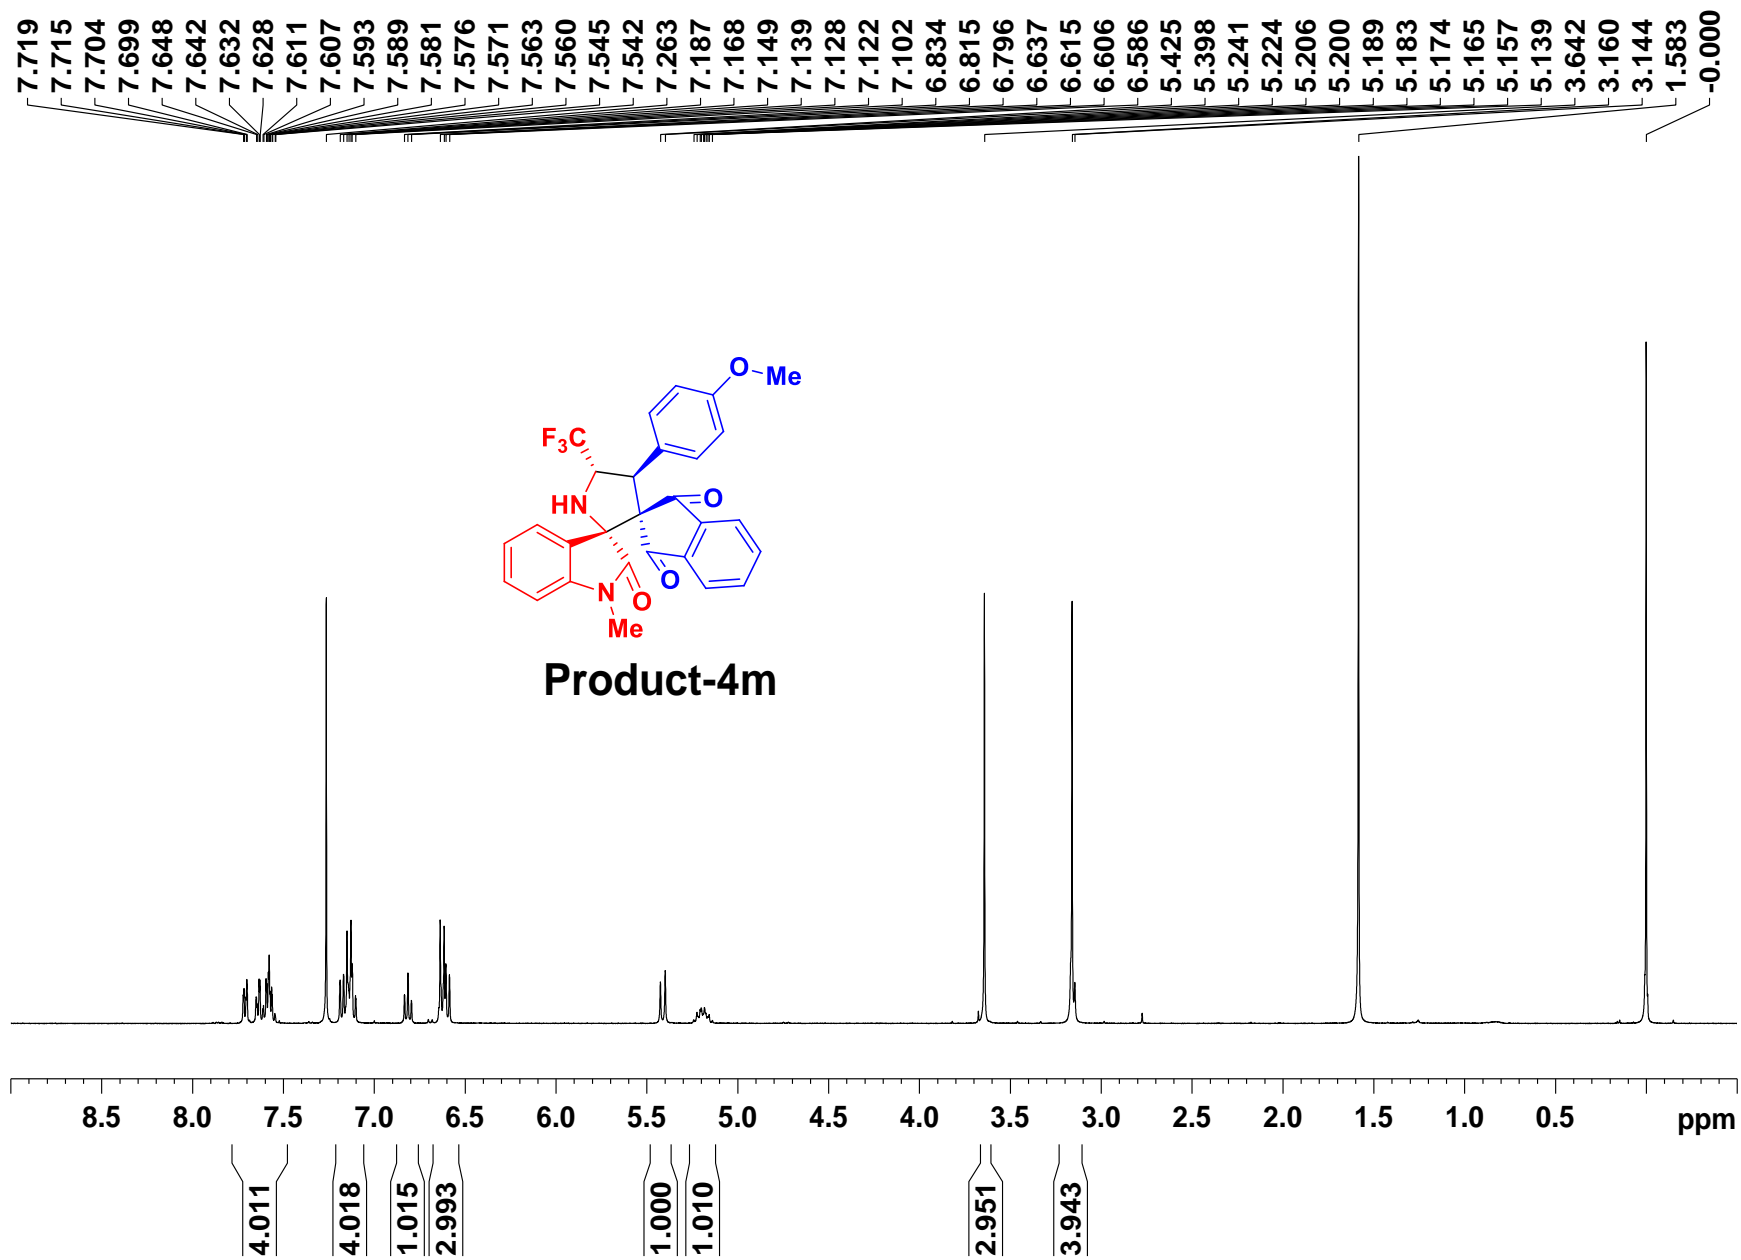

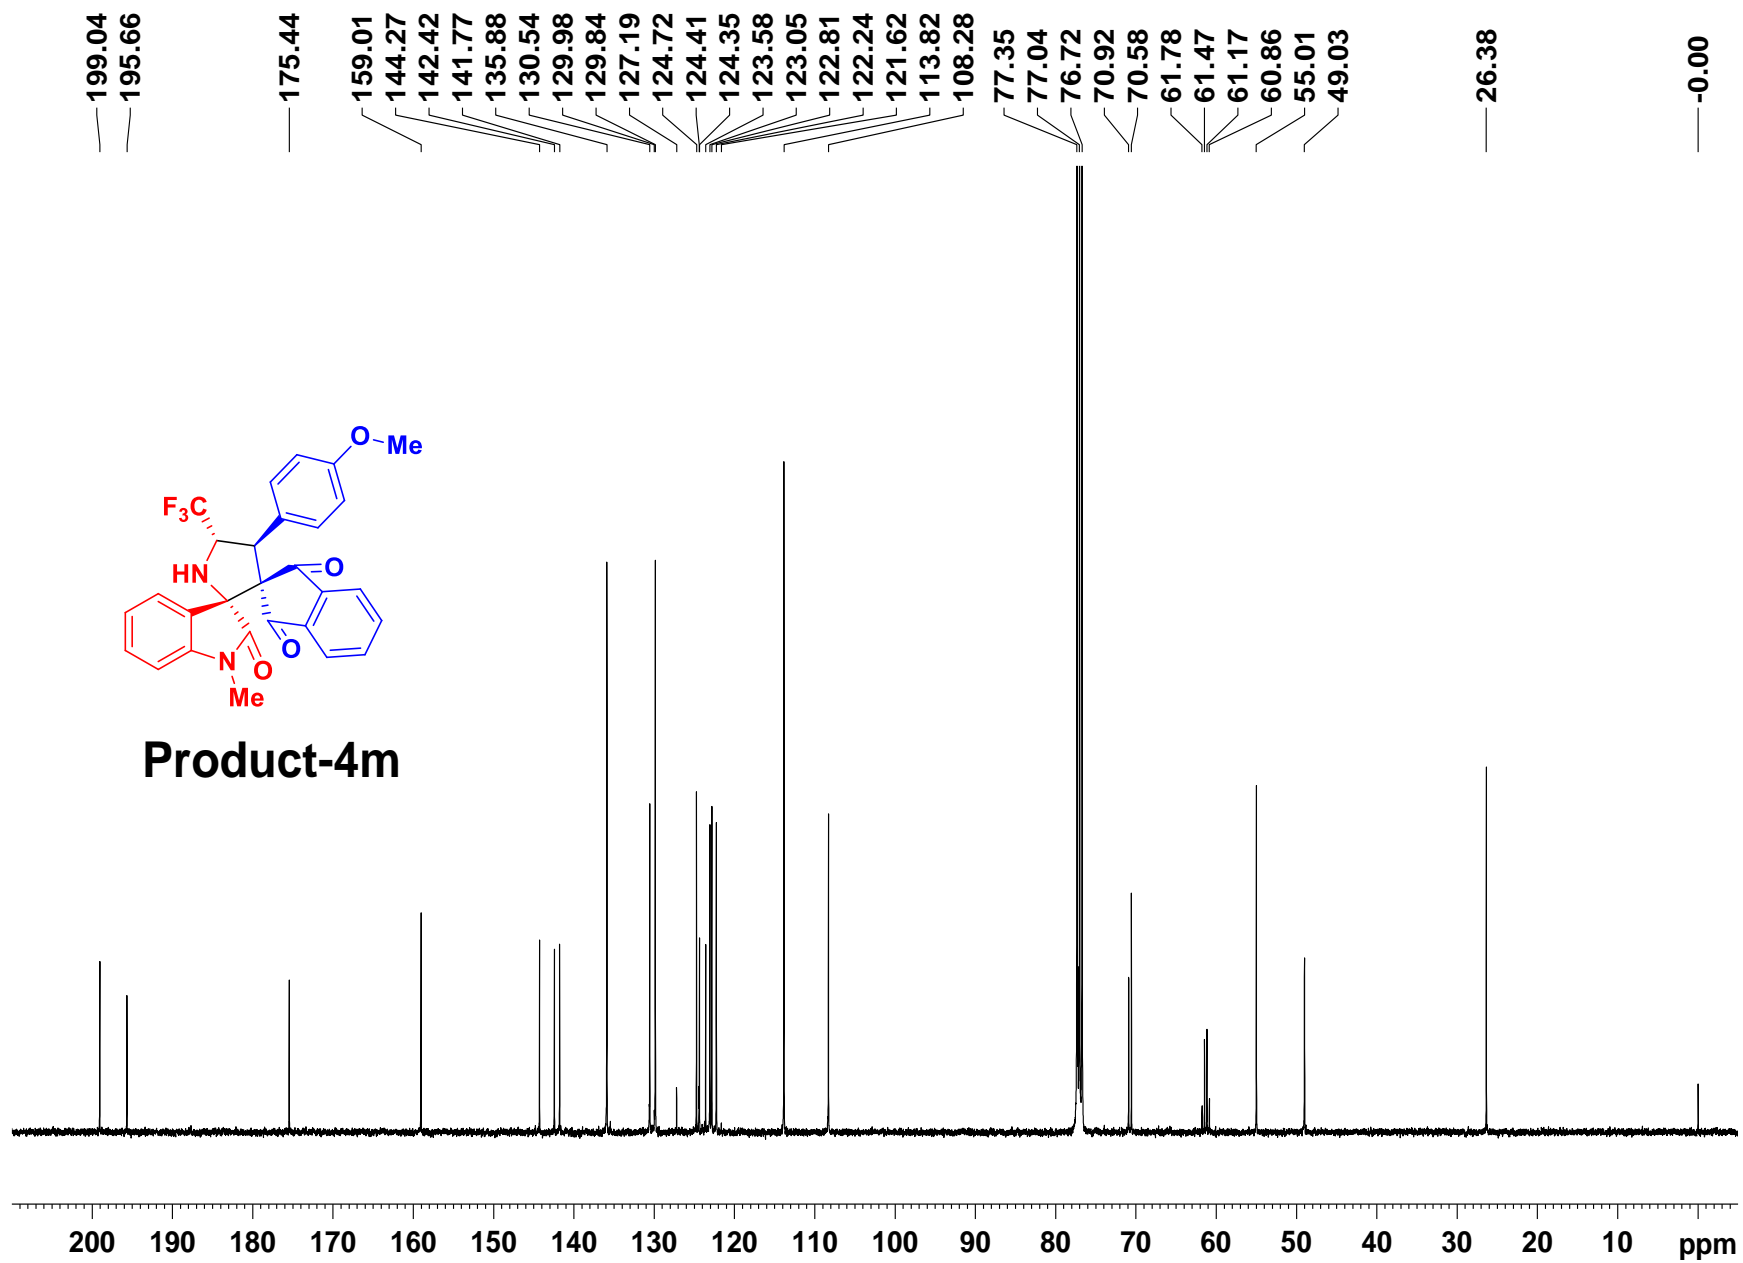



—72.73

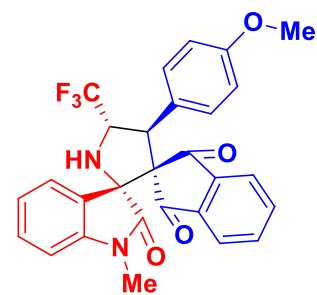

**Product-4m**

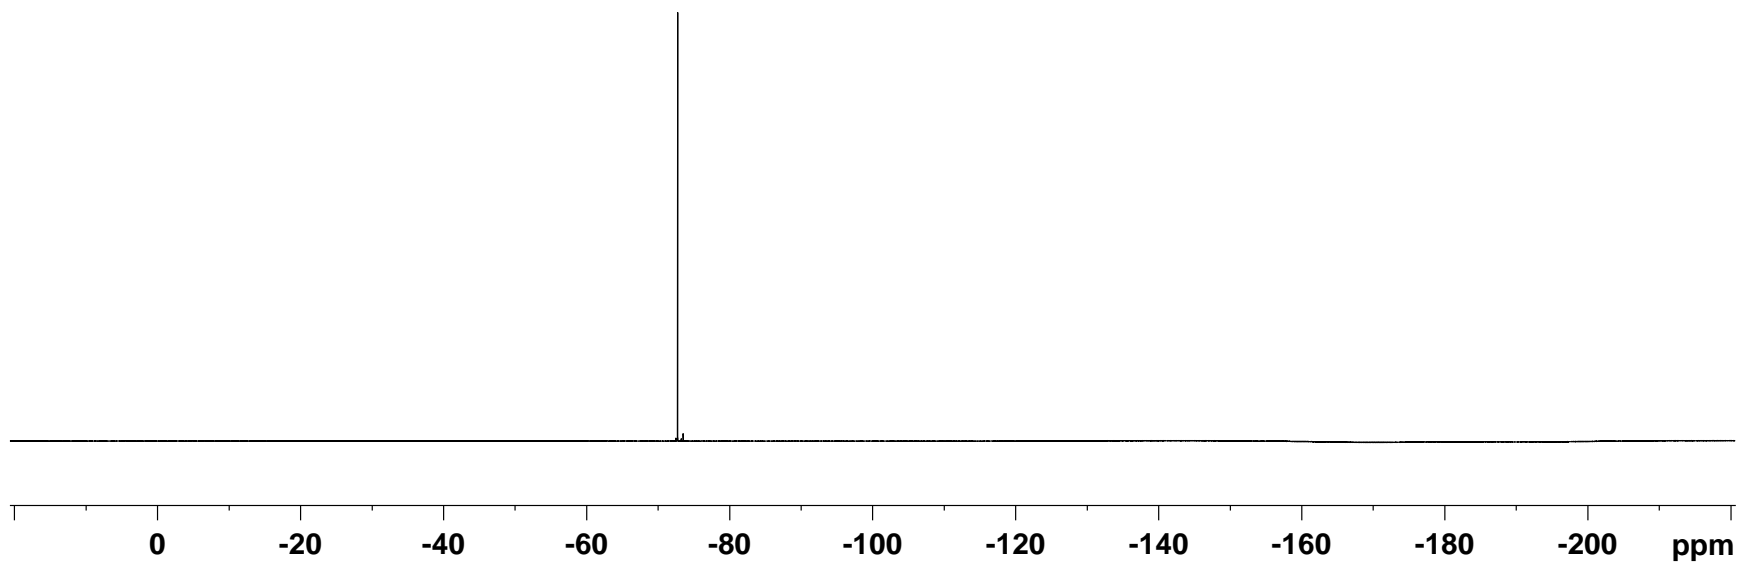

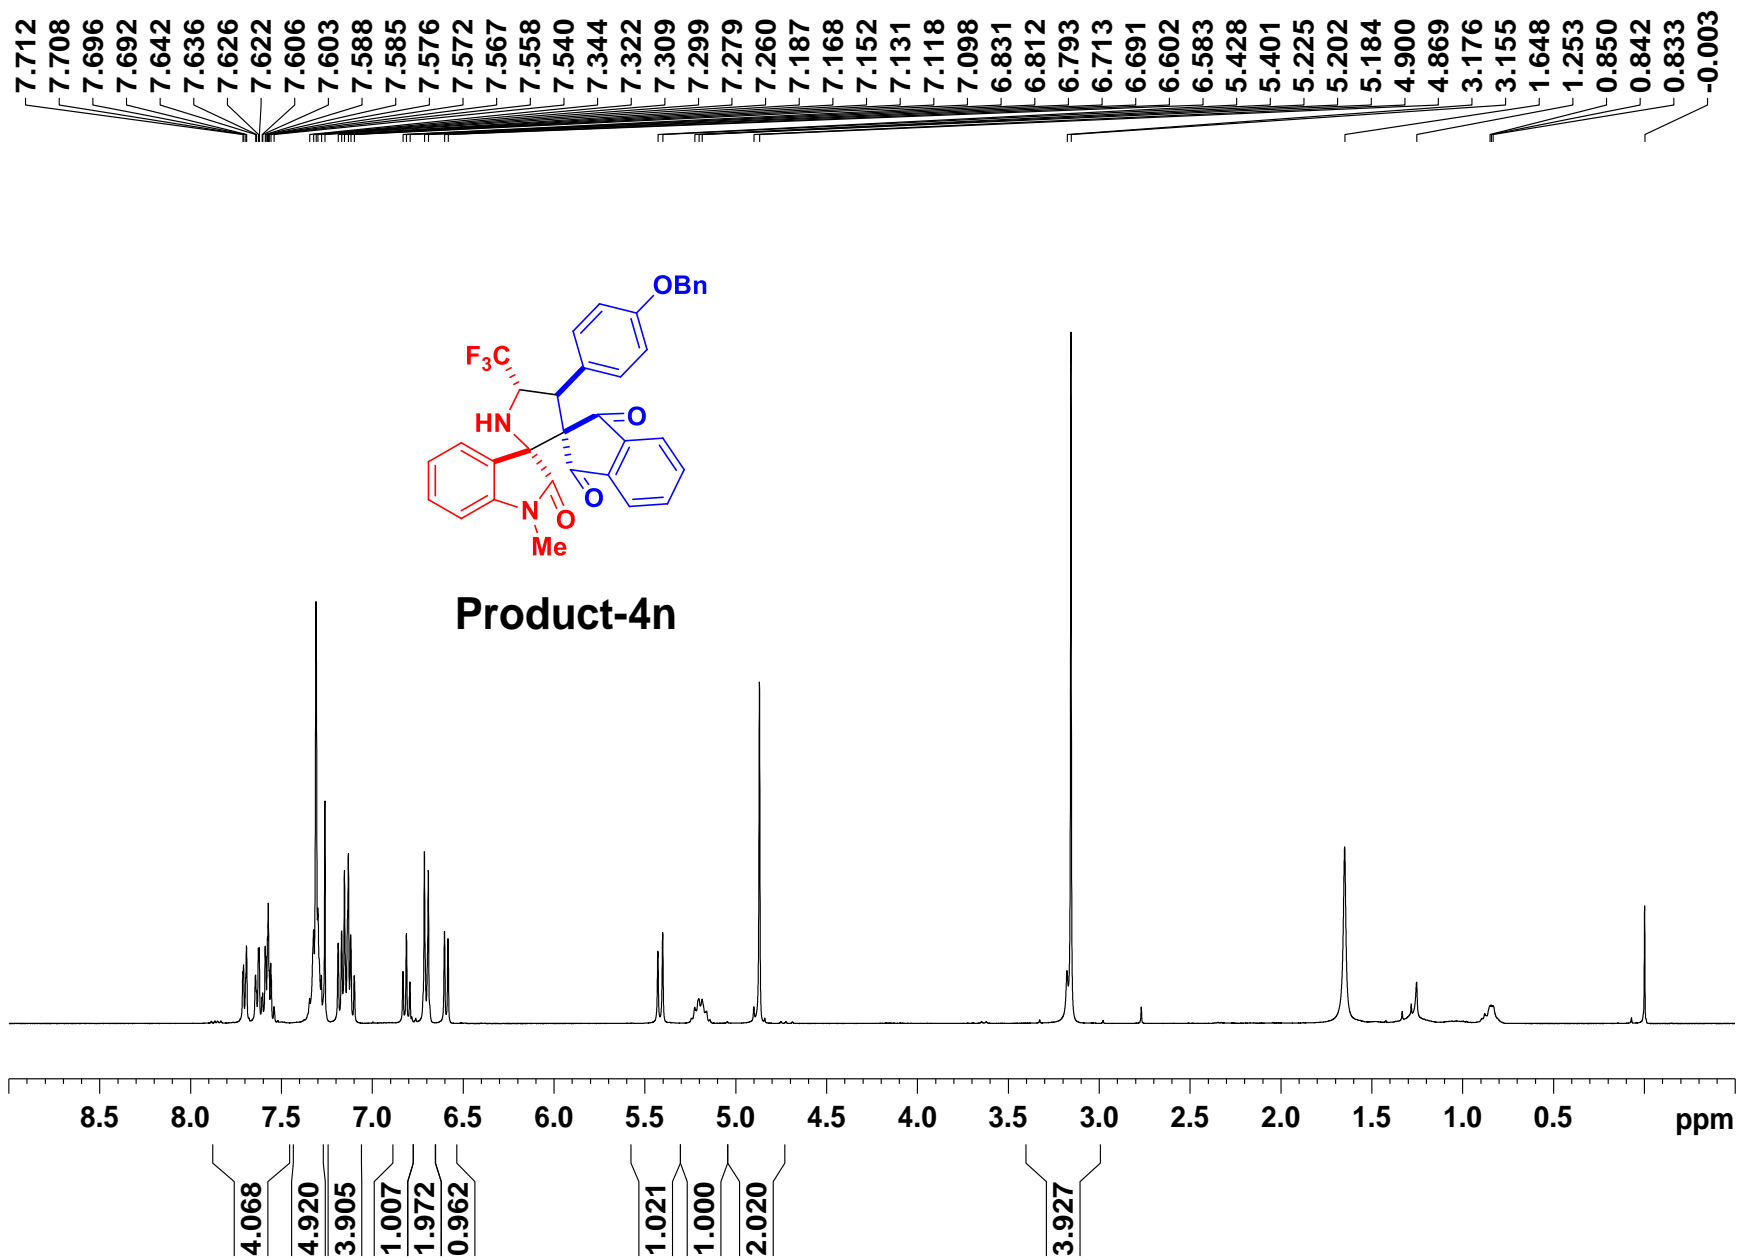

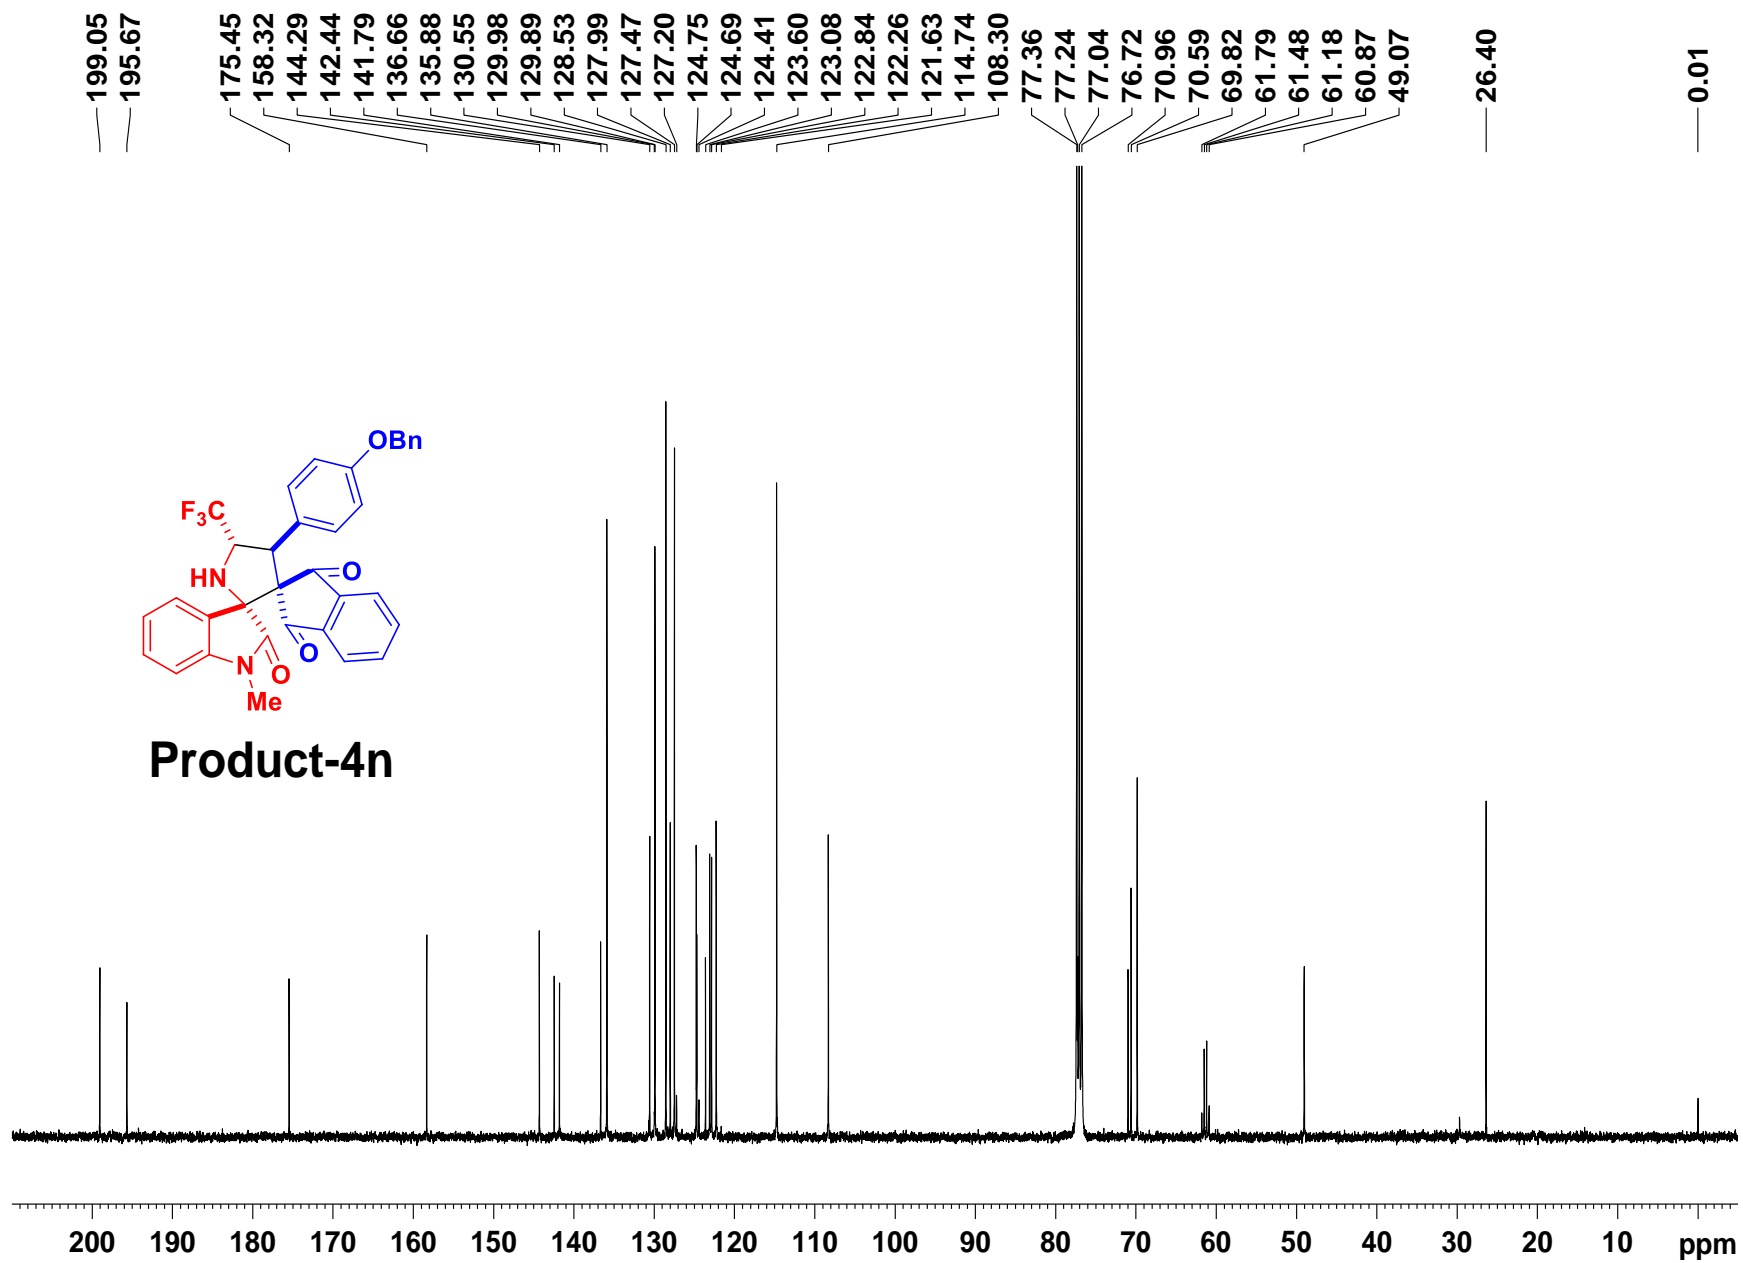

—72.71

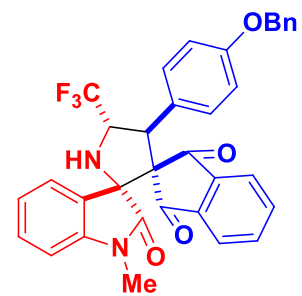

**Product-4n**

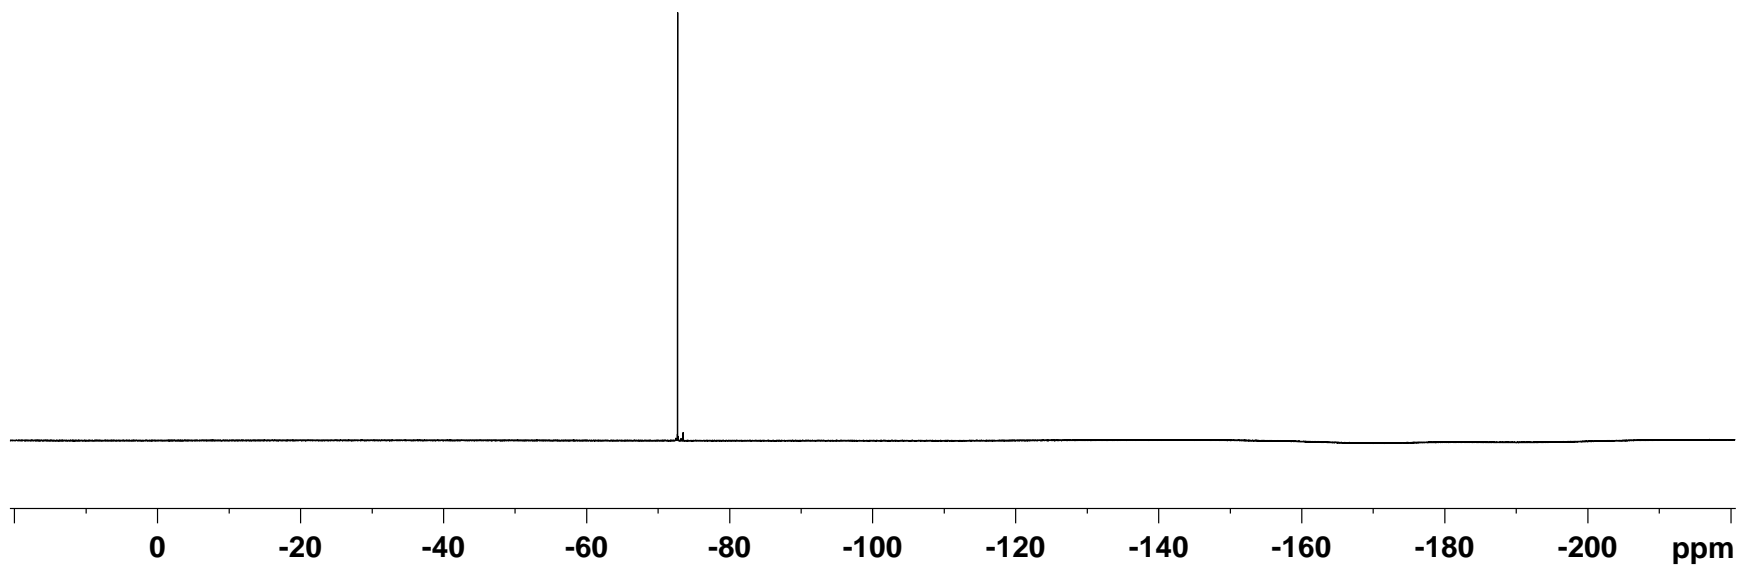

S60

7.629  
7.593  
7.577  
7.561  
7.546  
7.528  
7.263  
7.190  
7.171  
7.129  
7.110  
7.089  
7.079  
7.057  
6.824  
6.806  
6.787  
6.595  
6.575  
6.445  
6.423  
5.385  
5.359  
5.201  
5.185

— 3.154

— 2.788

— 1.601

— -0.000

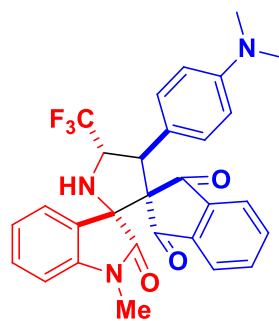

**Product-4o**

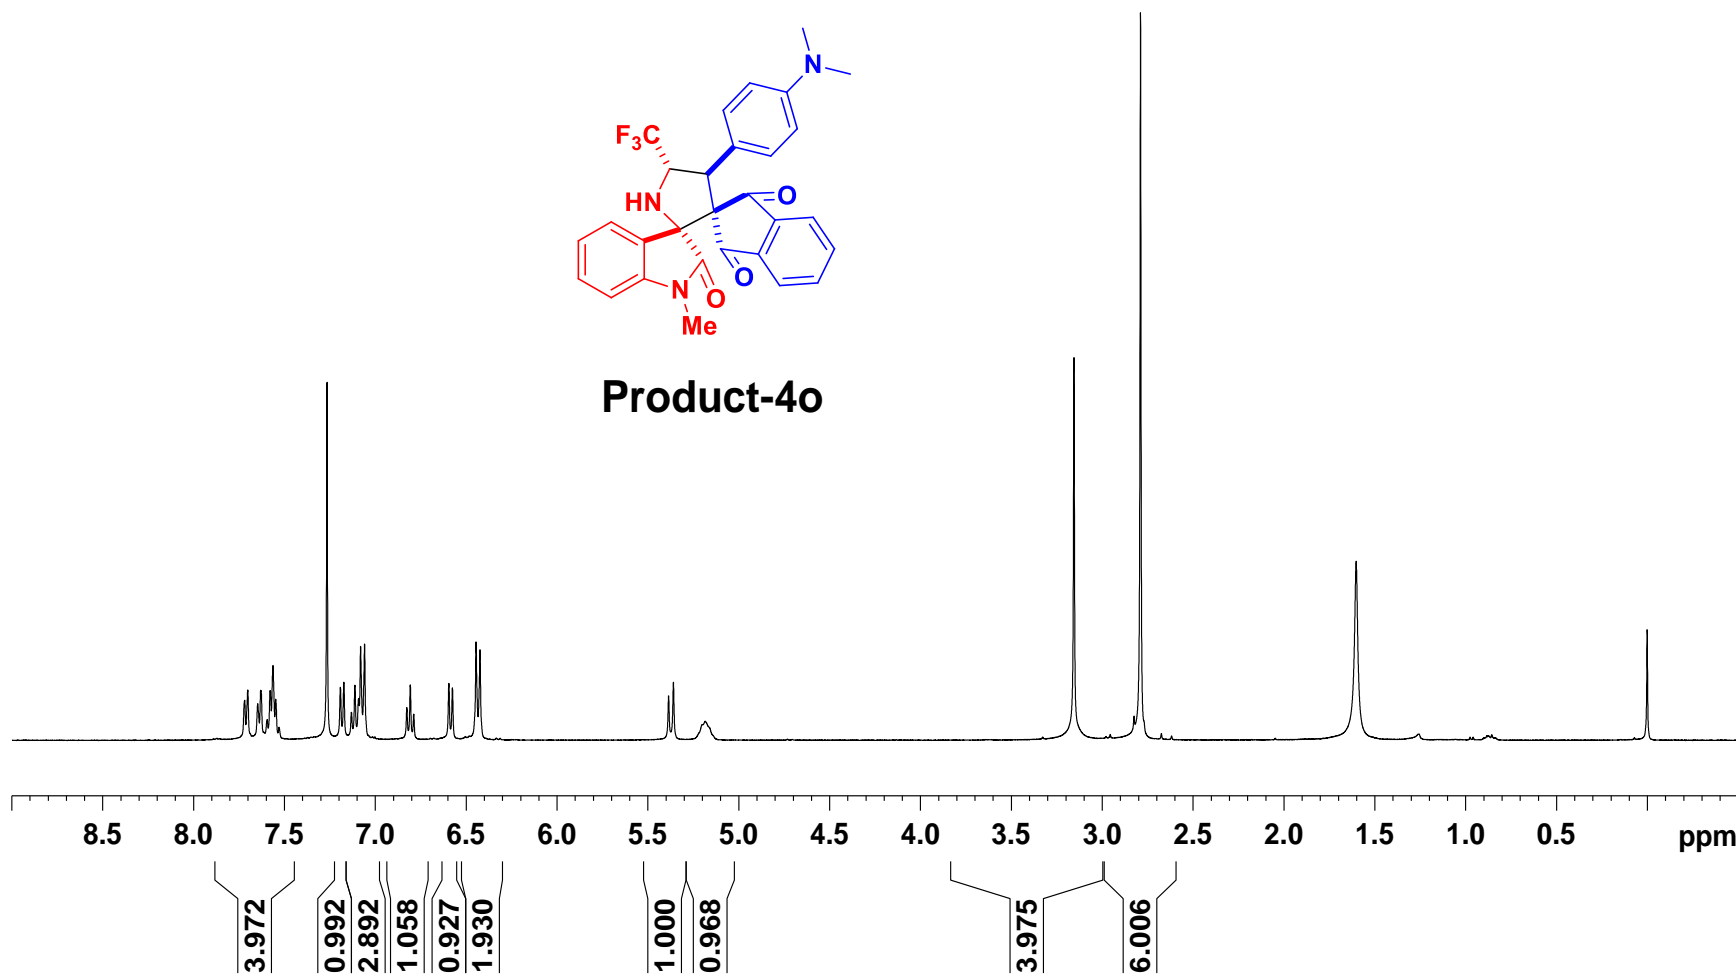

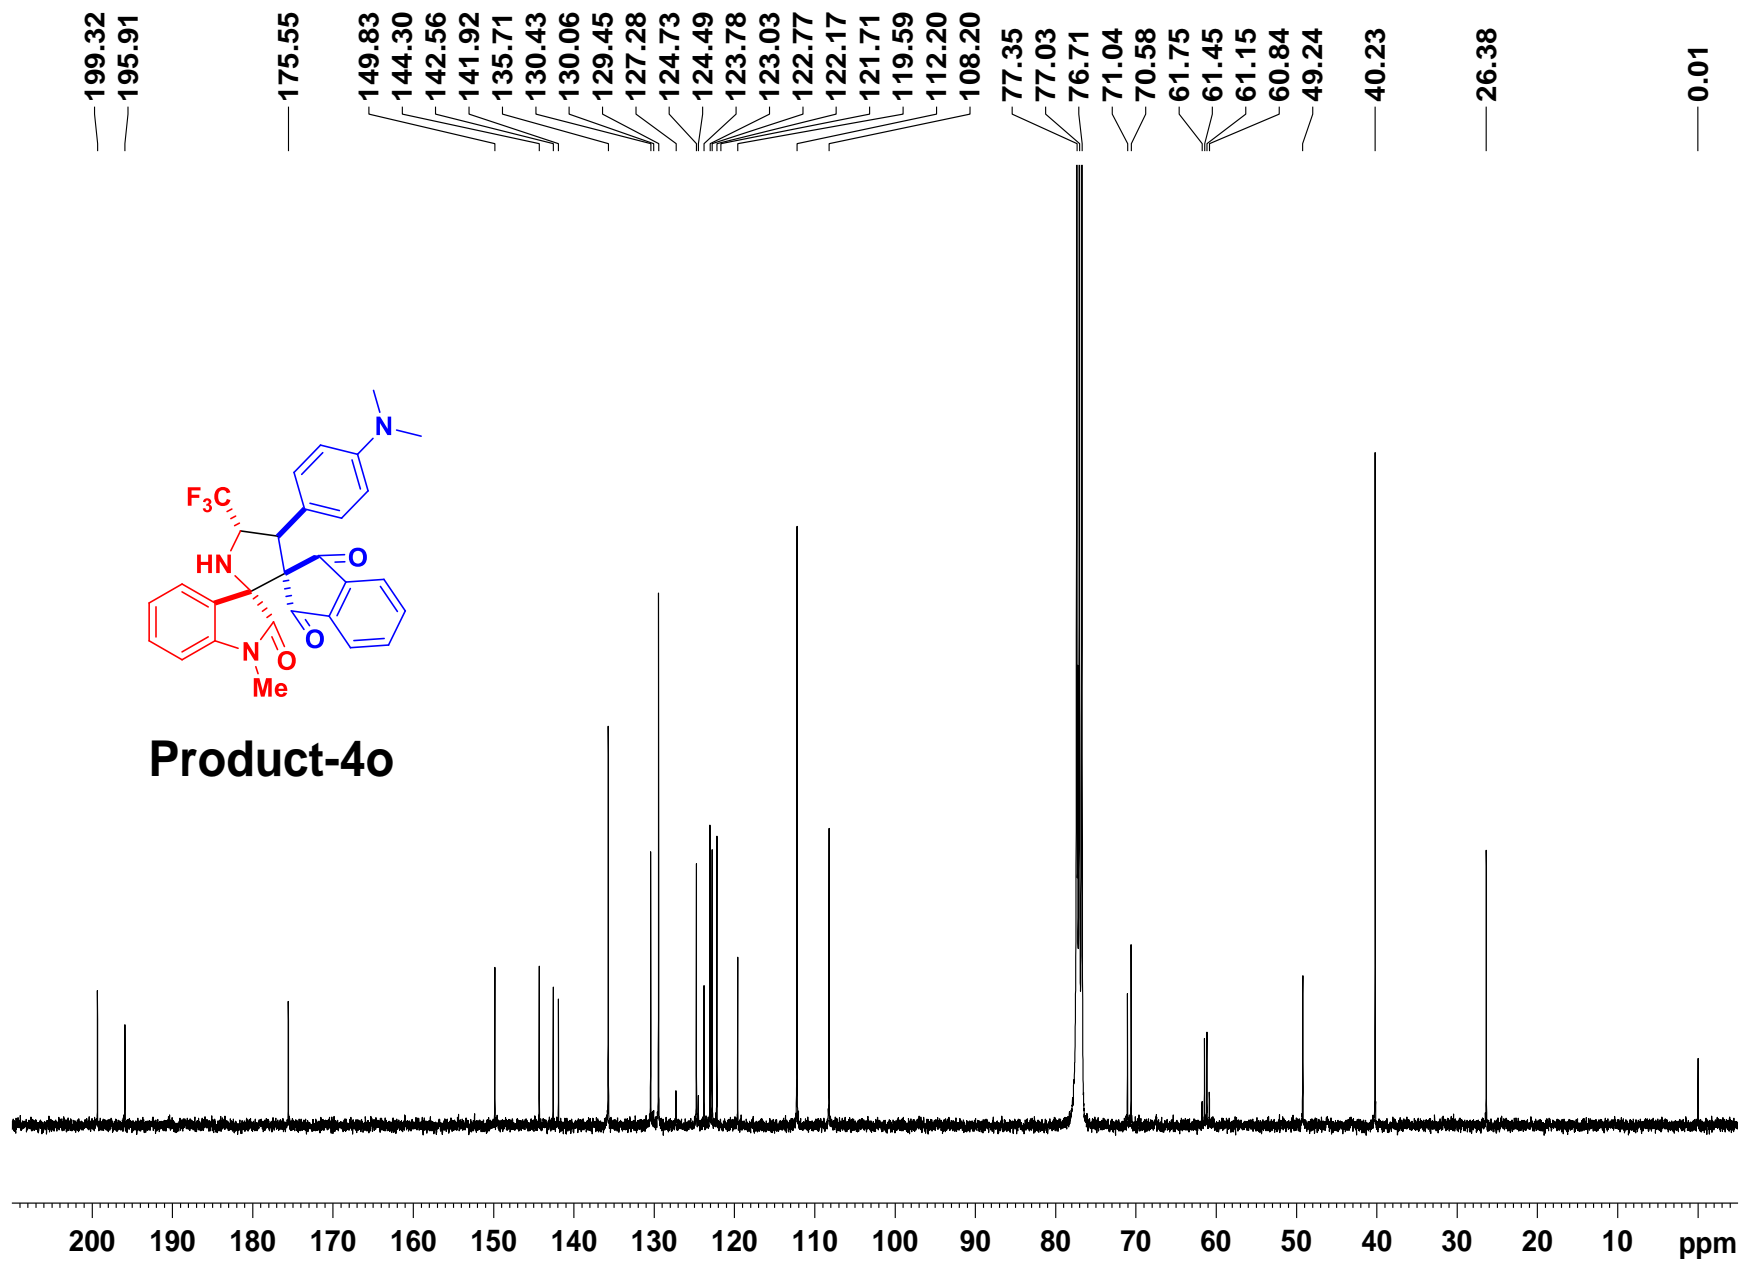

—72.67

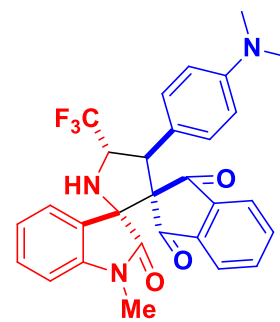

**Product-4o**

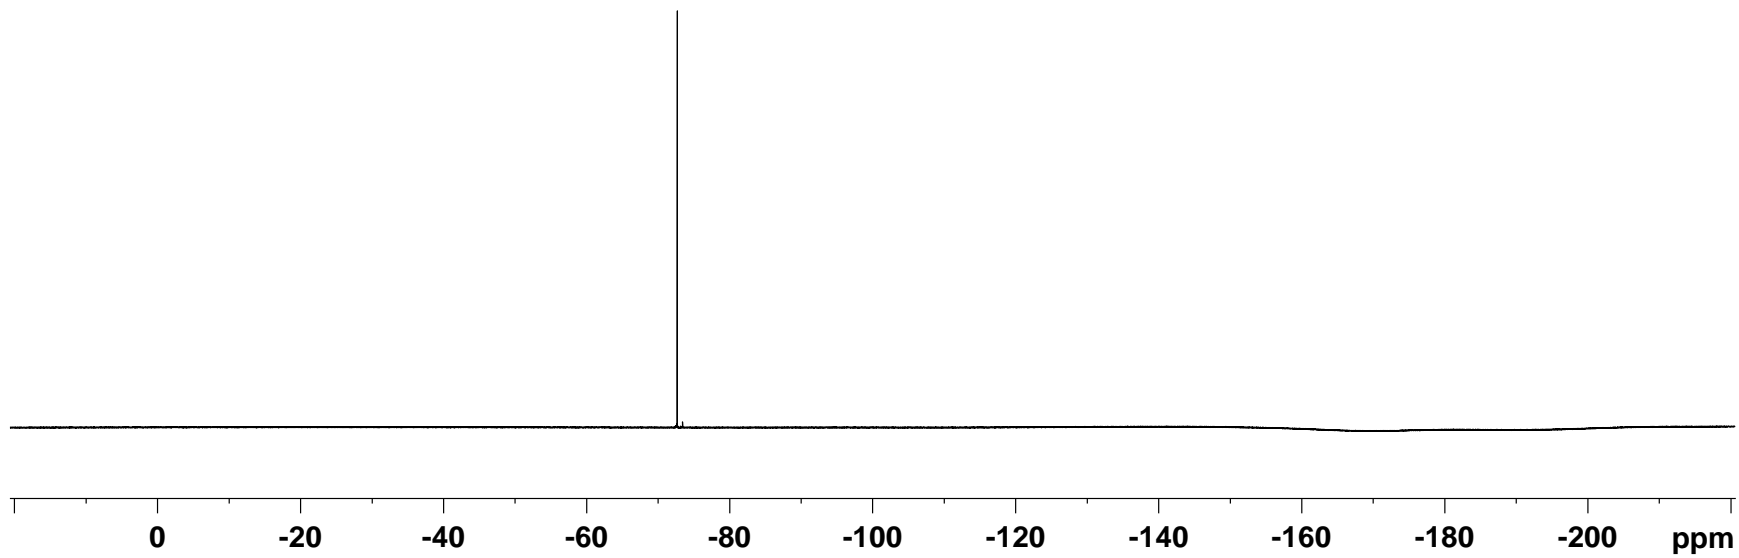

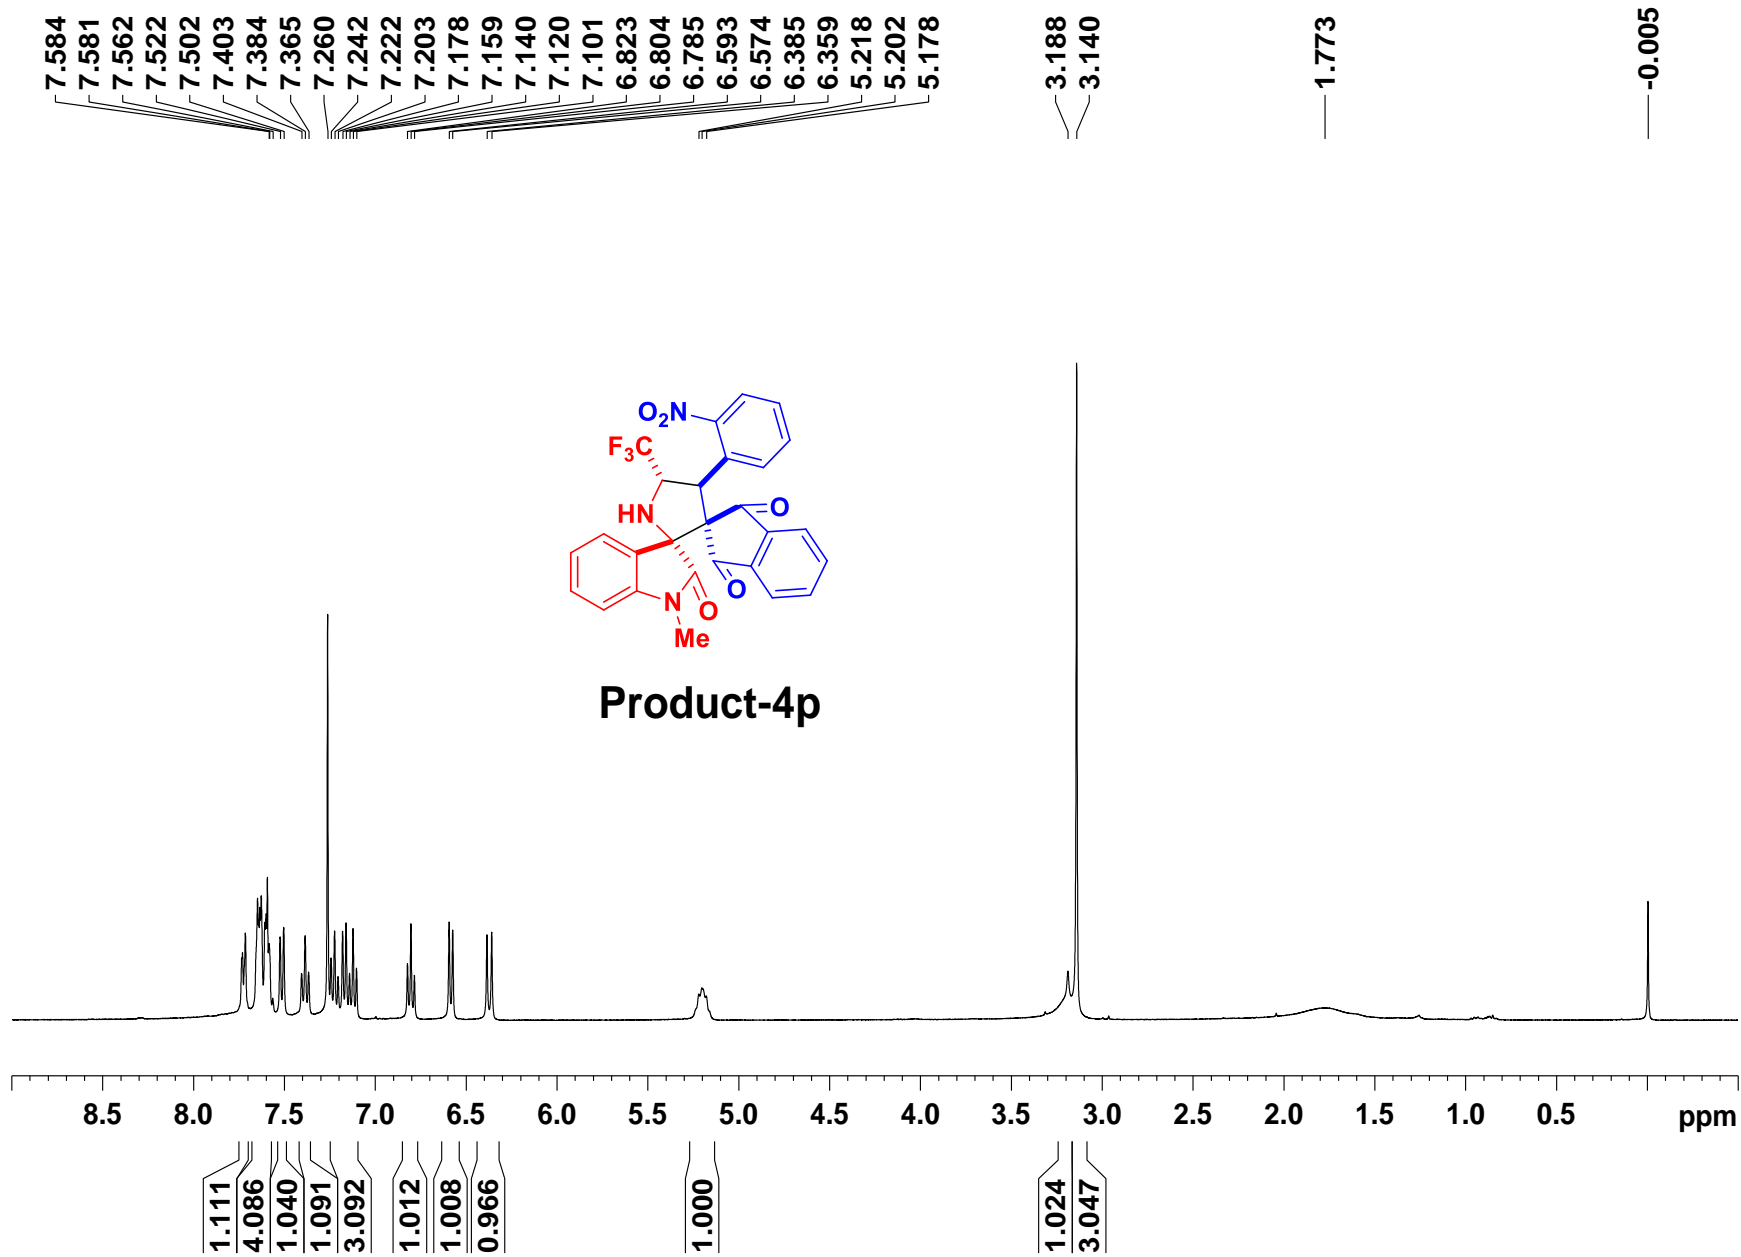



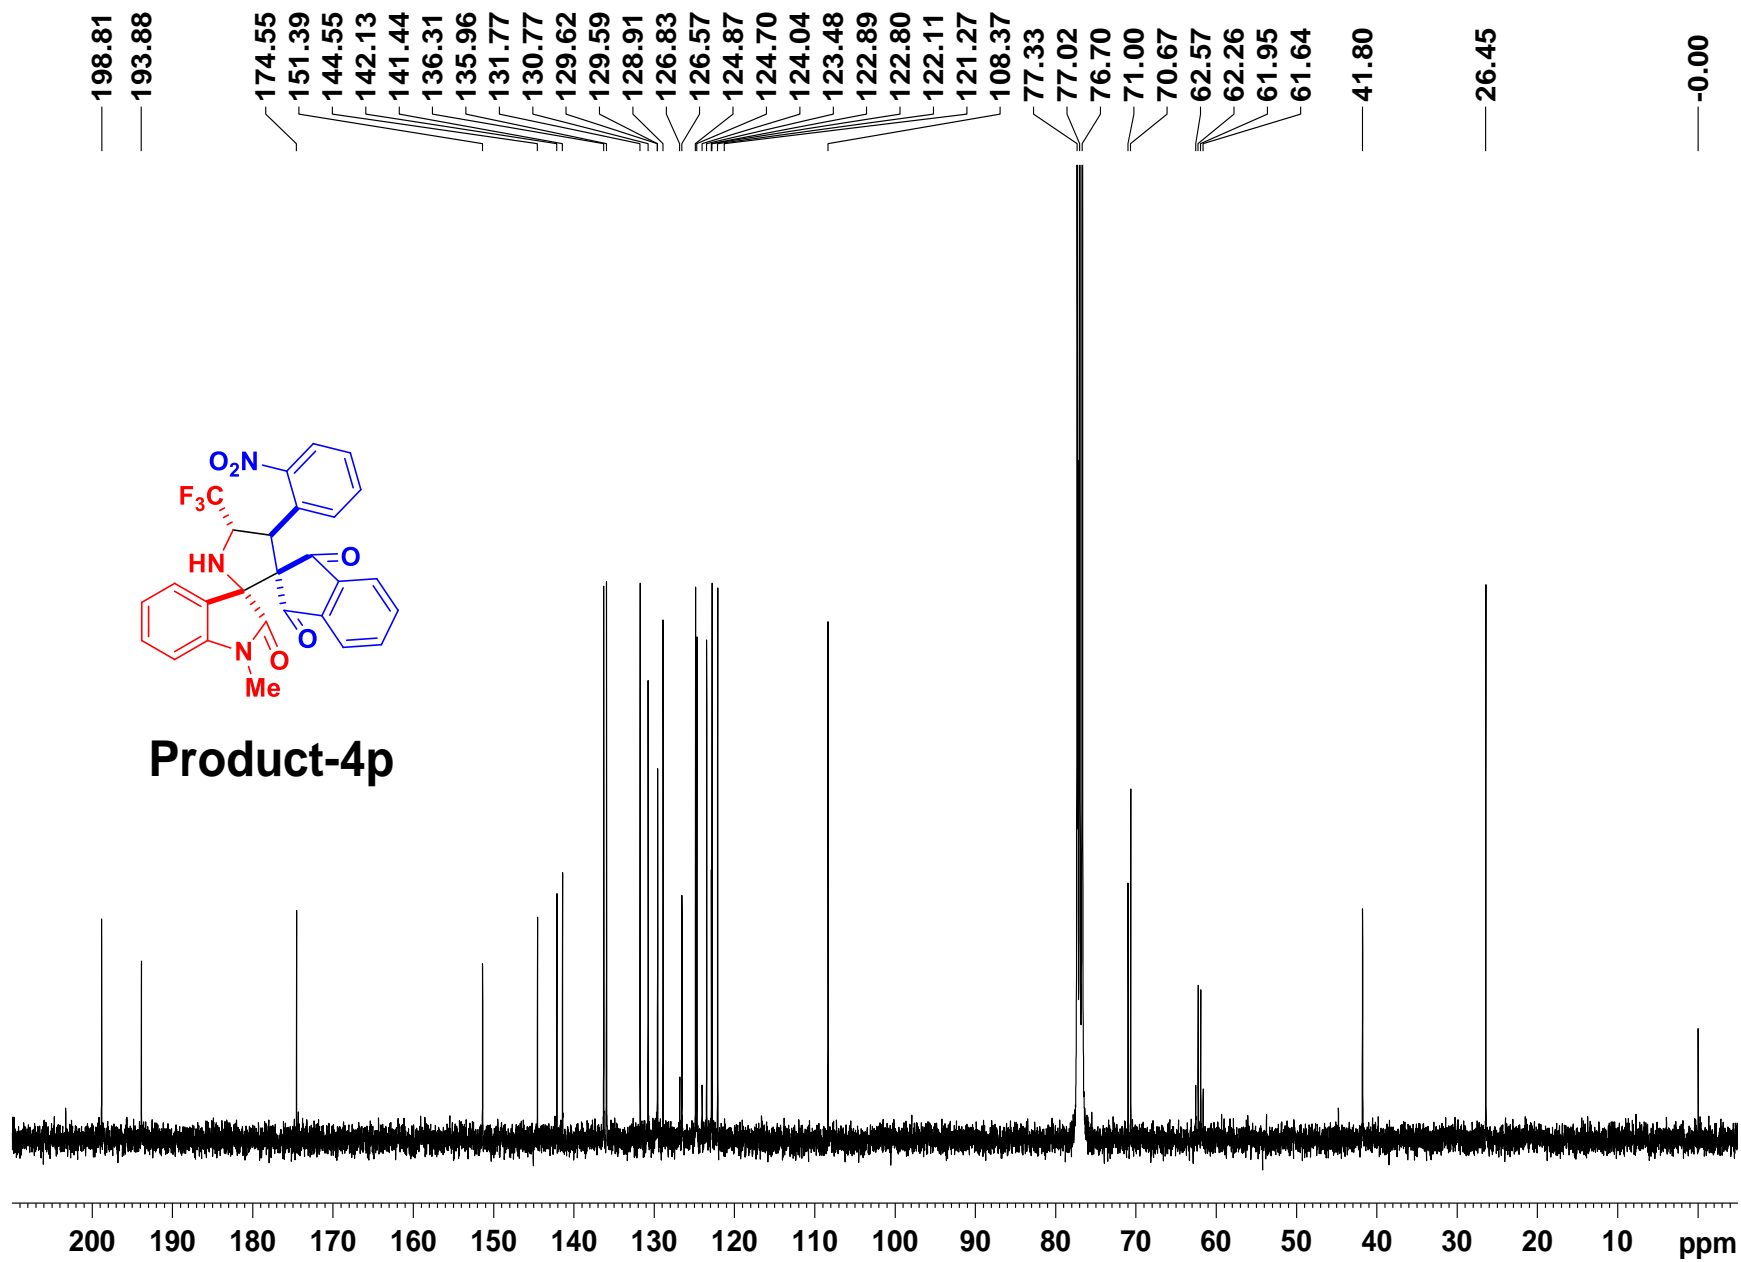

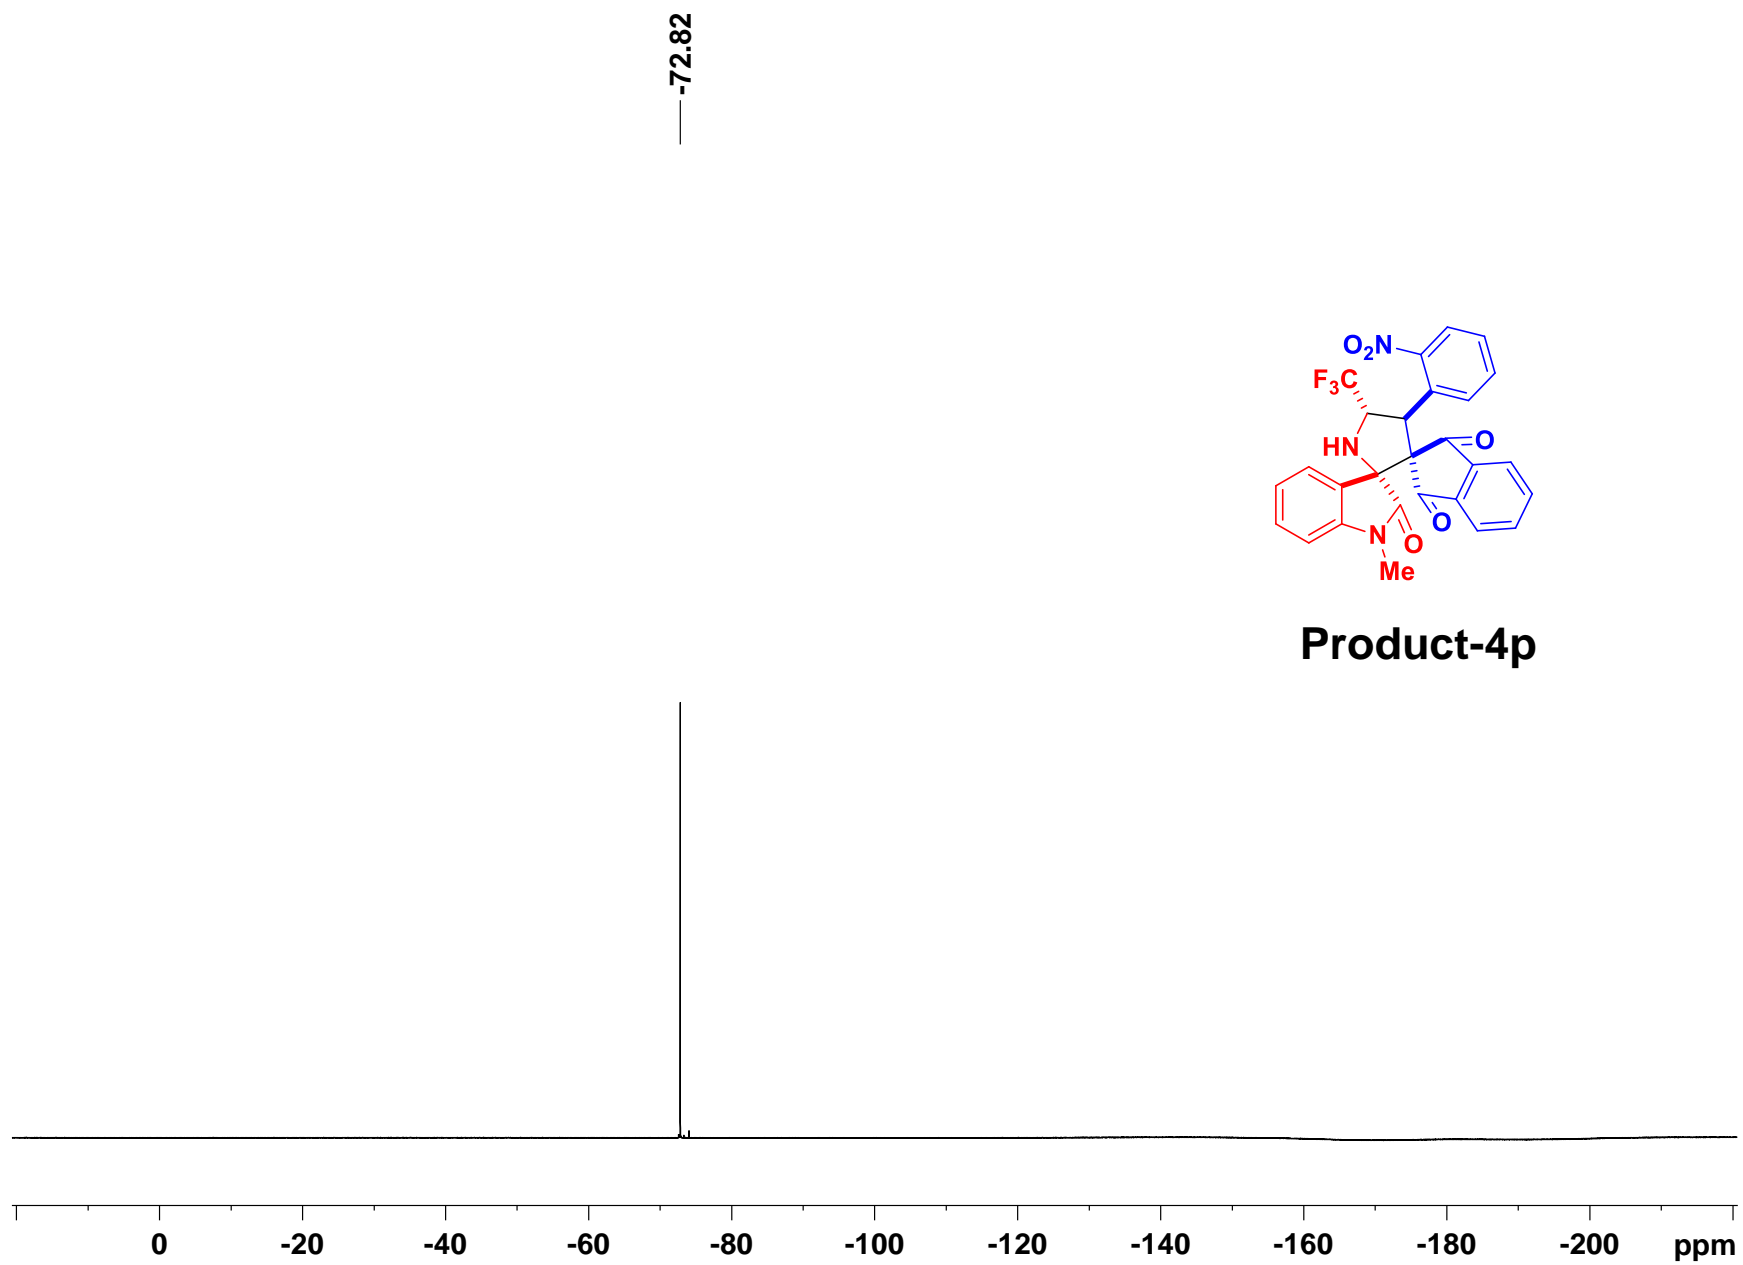

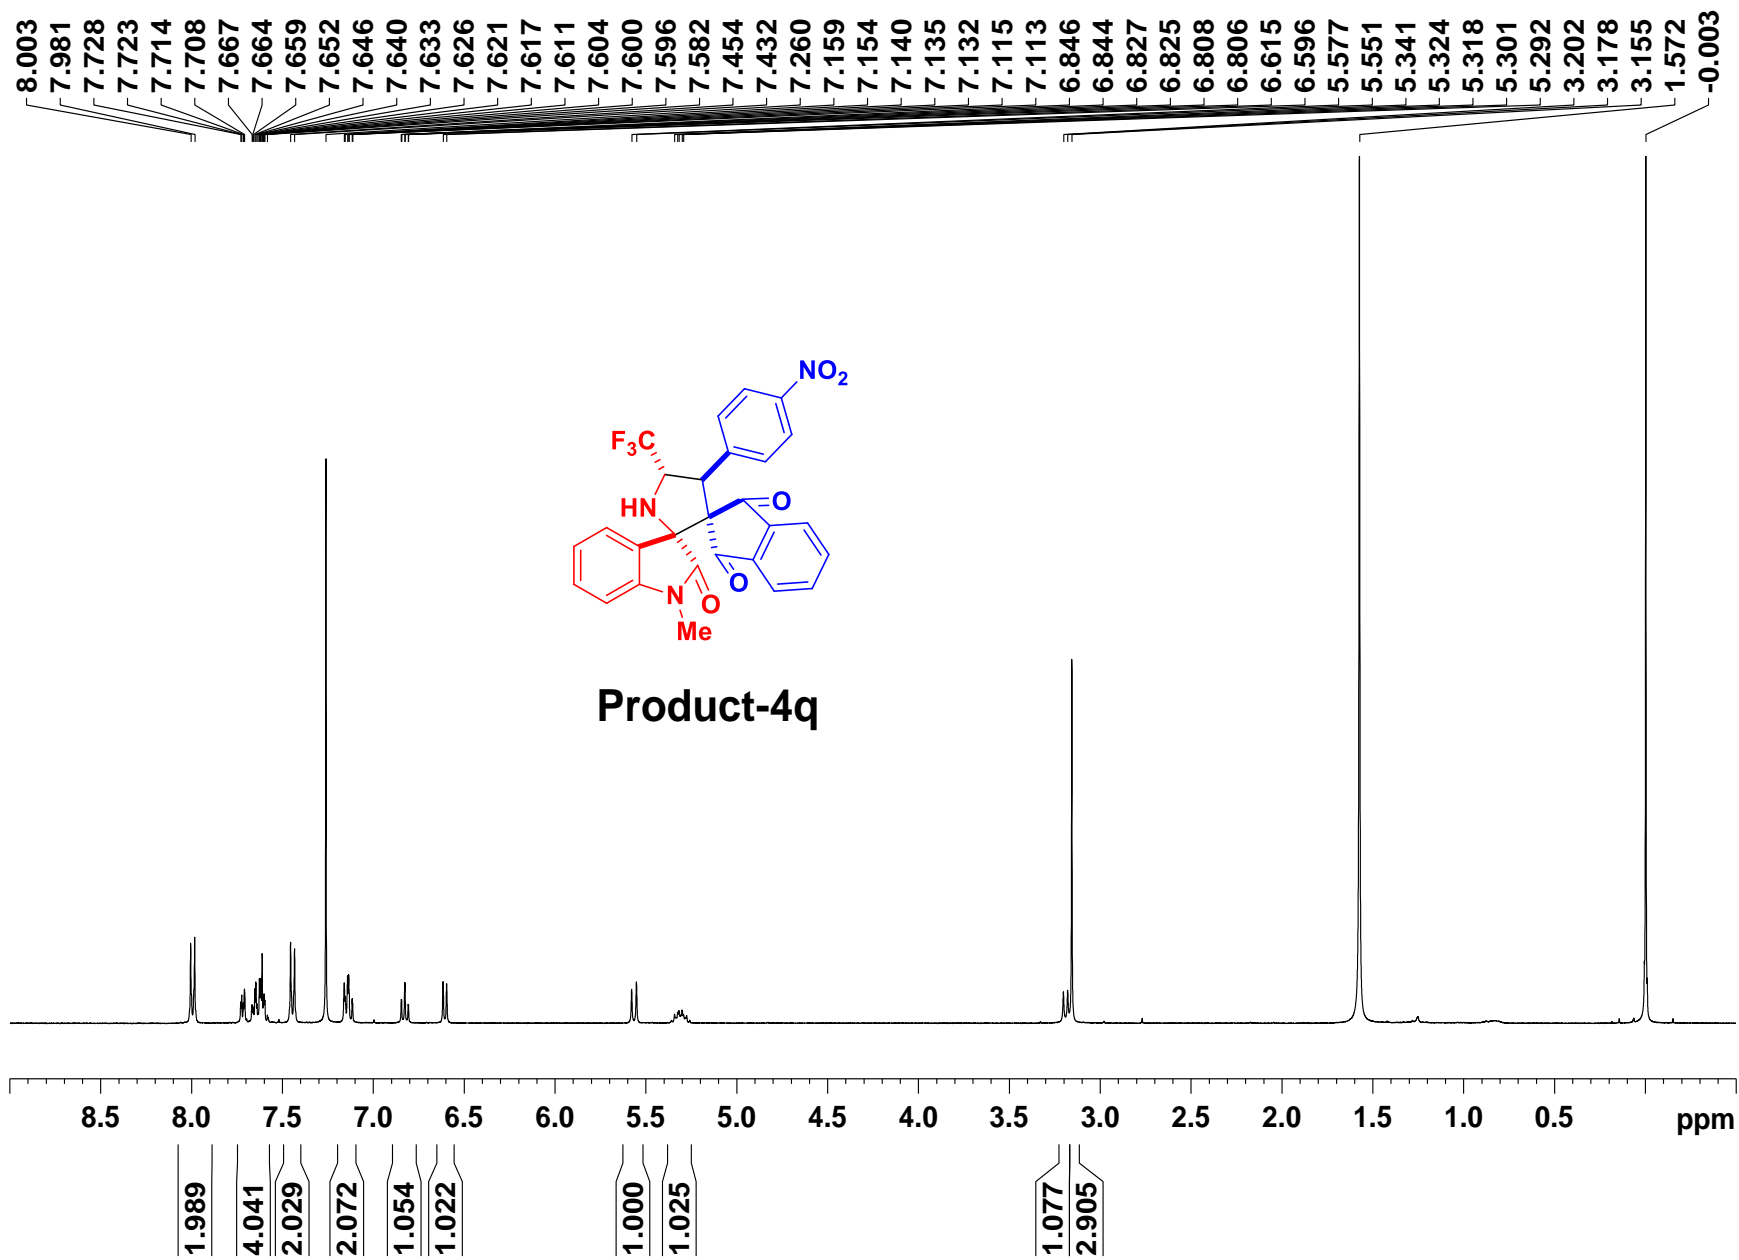

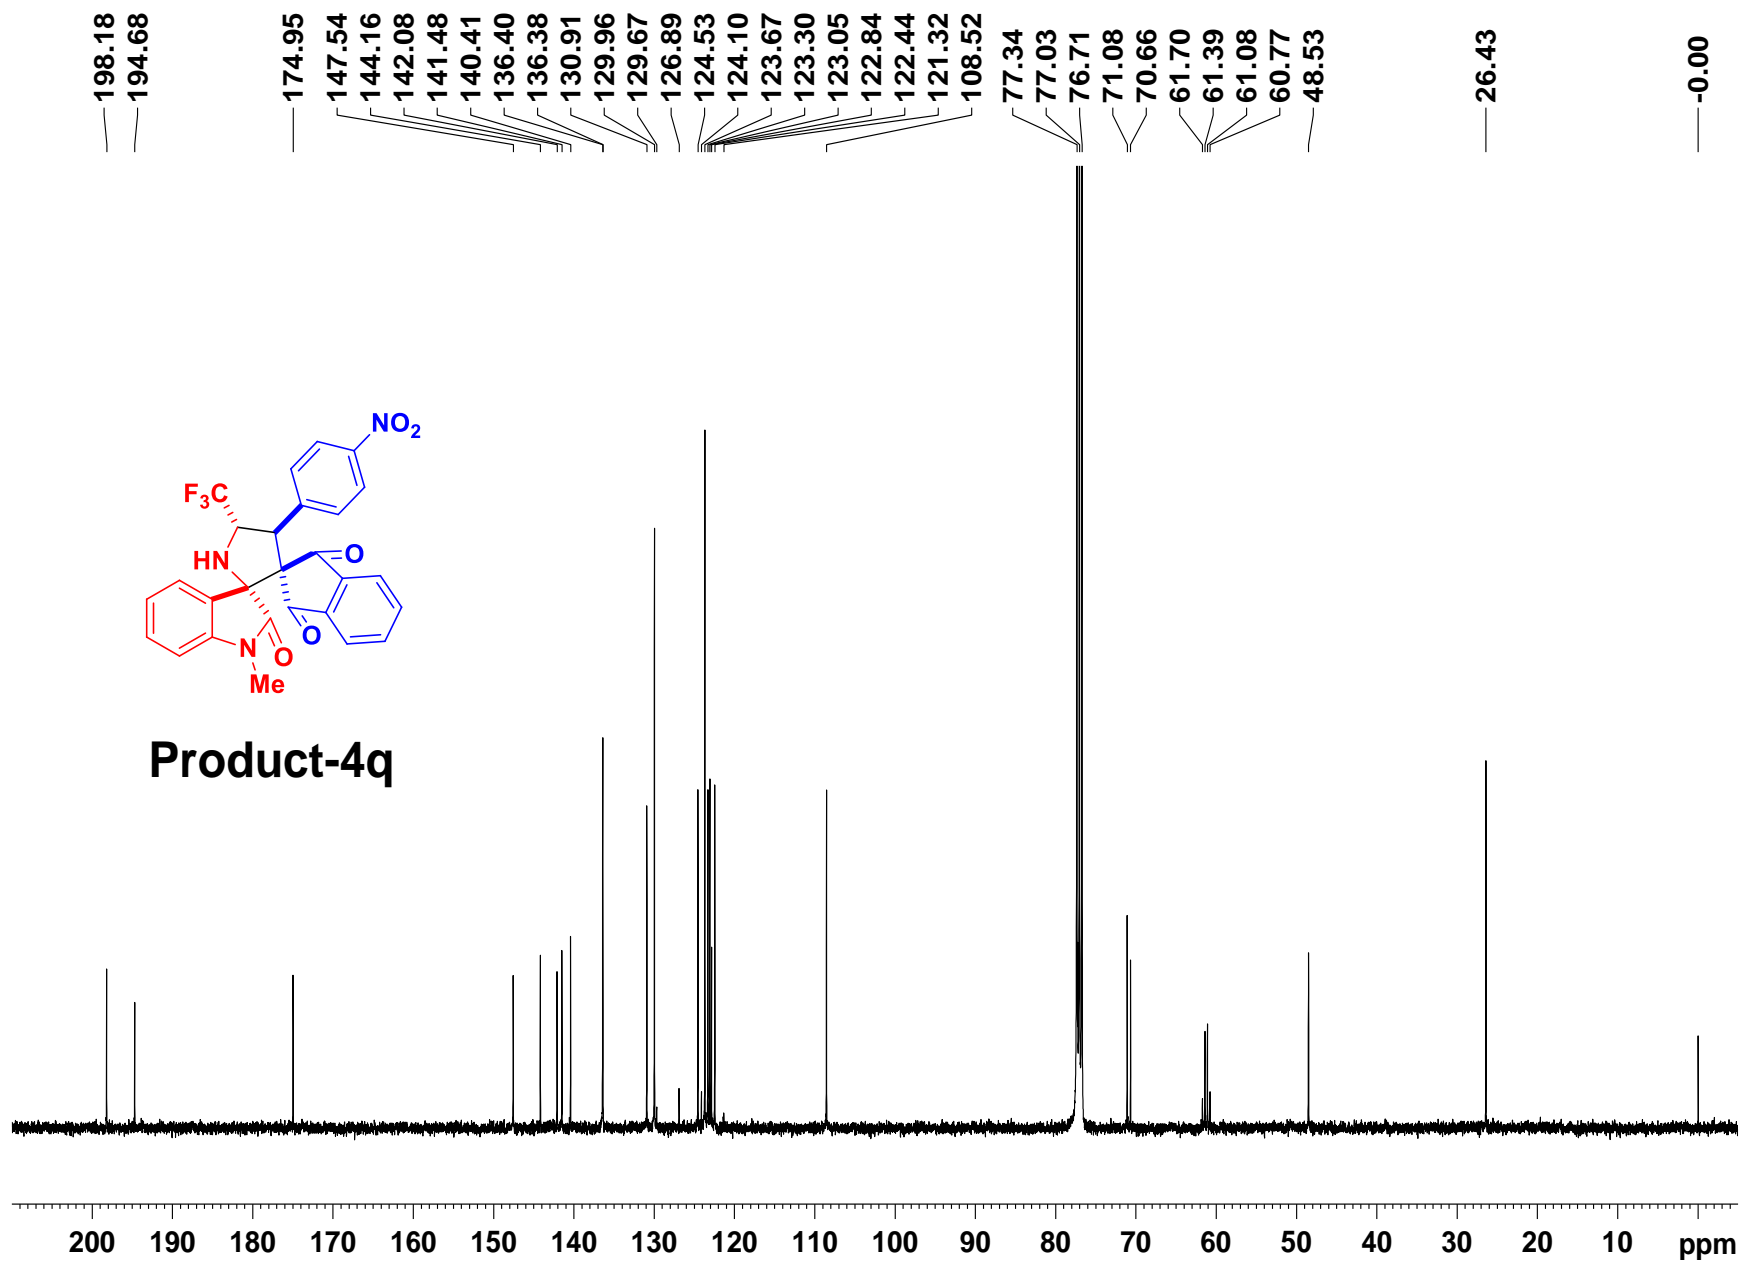

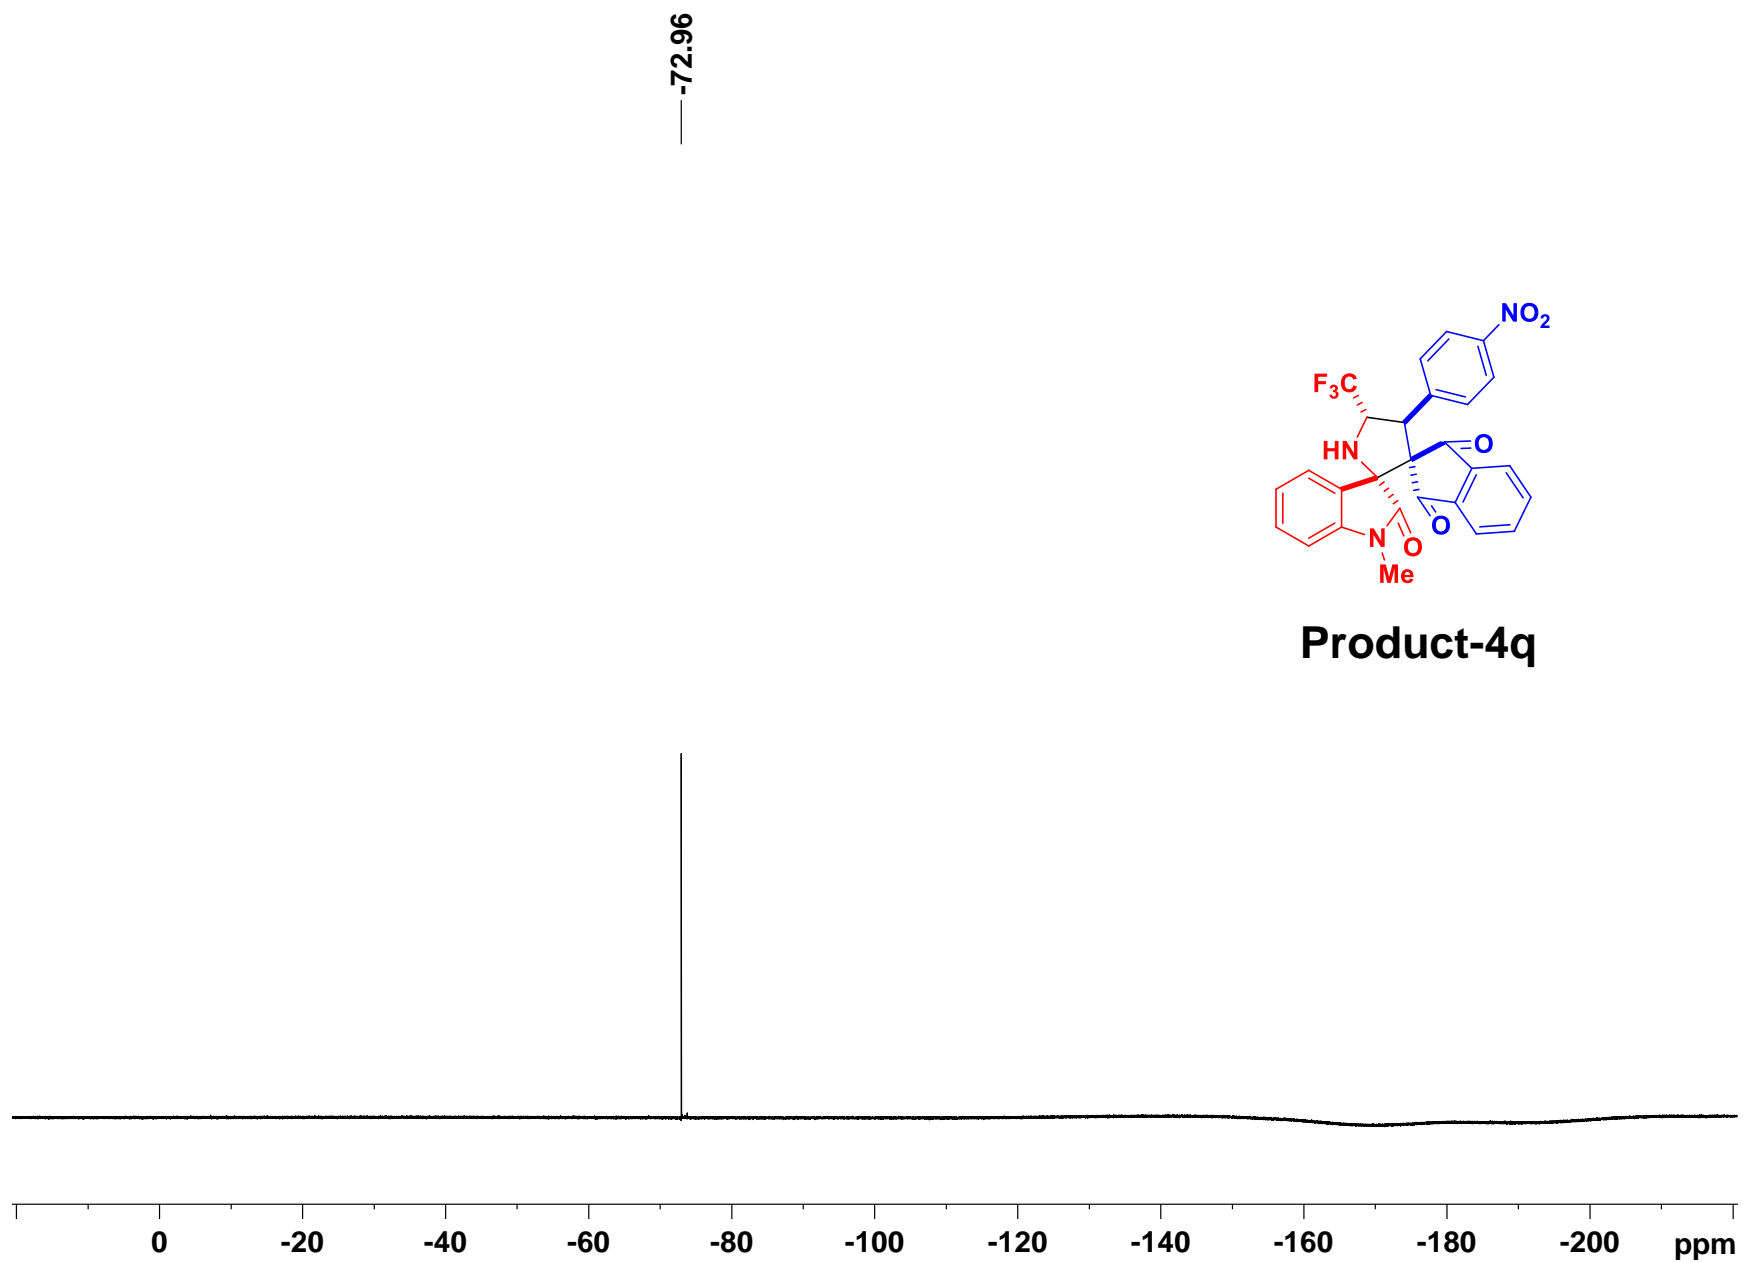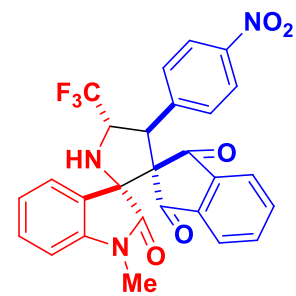

**Product-4q**

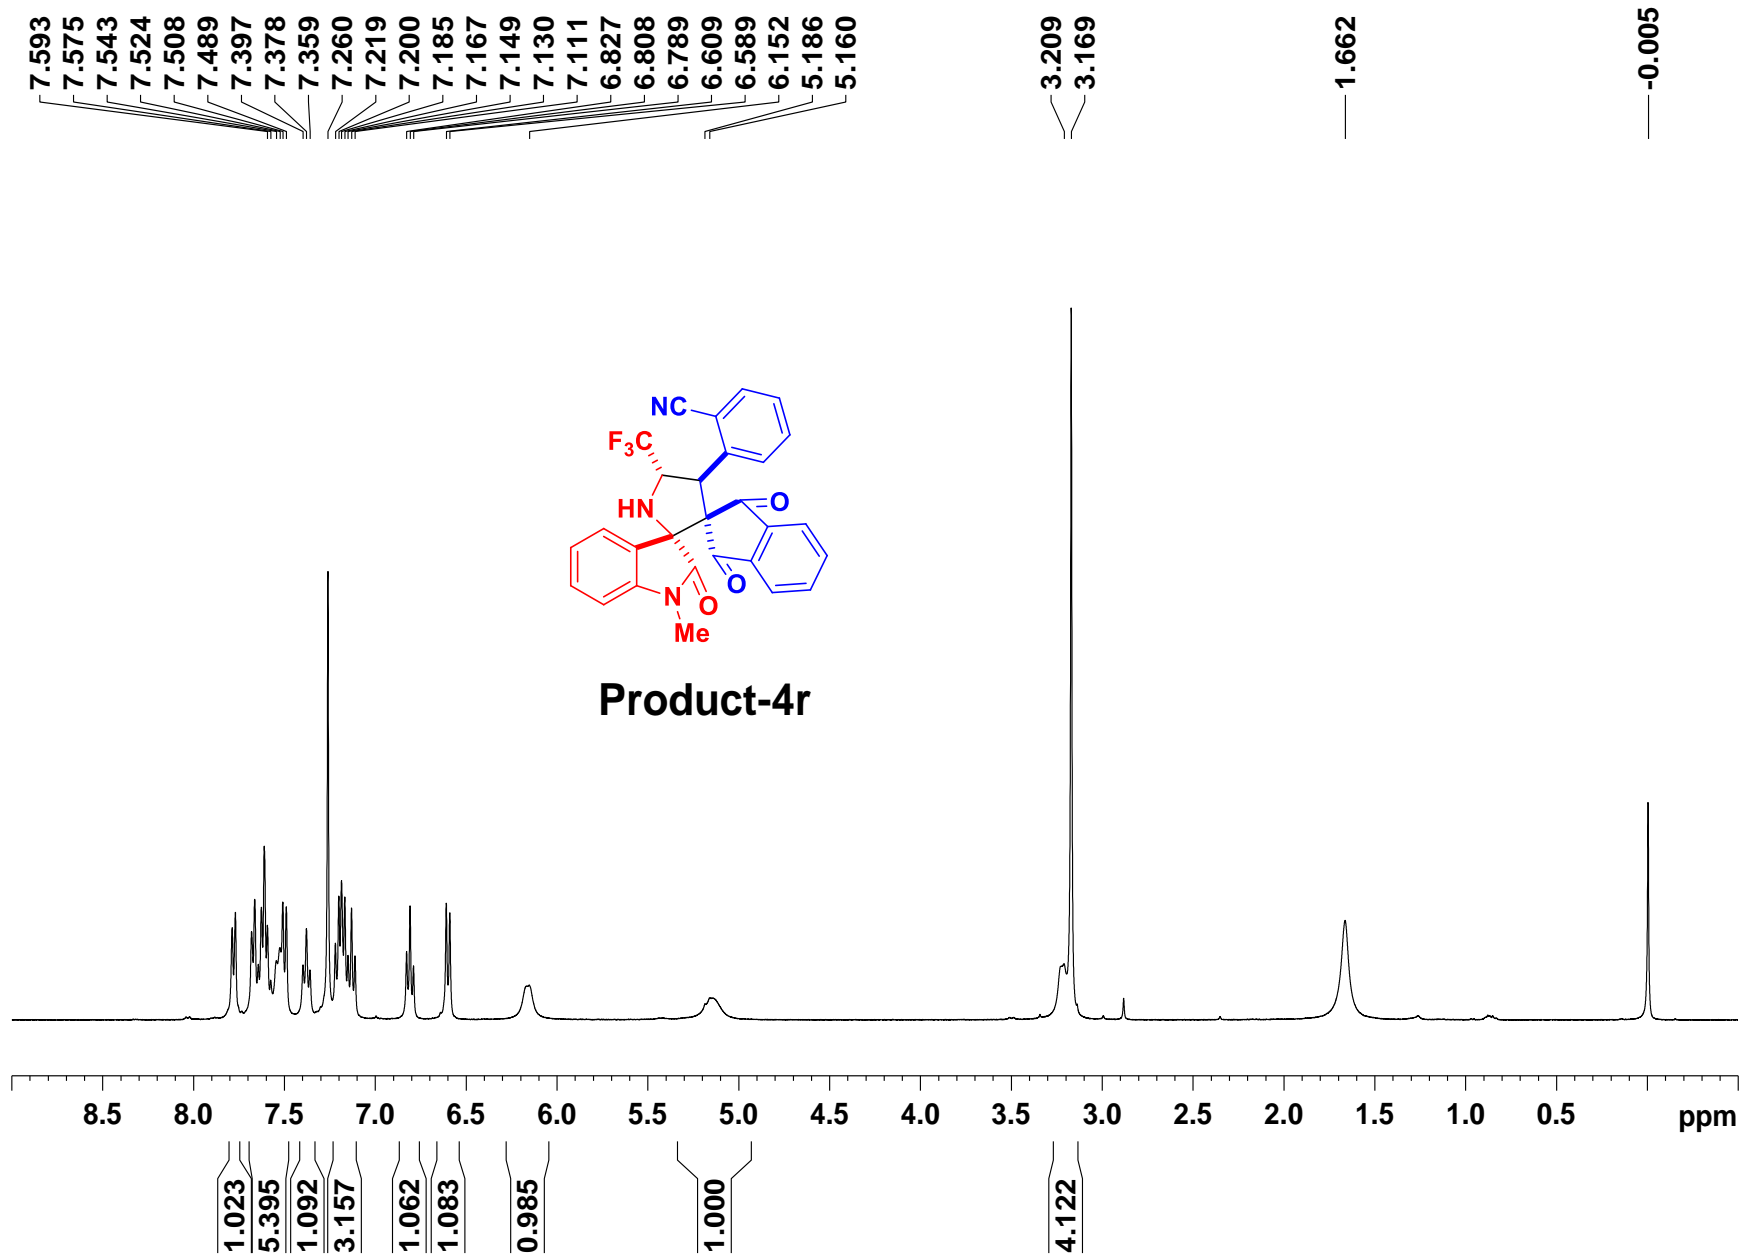

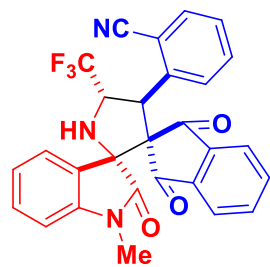

Product-4r

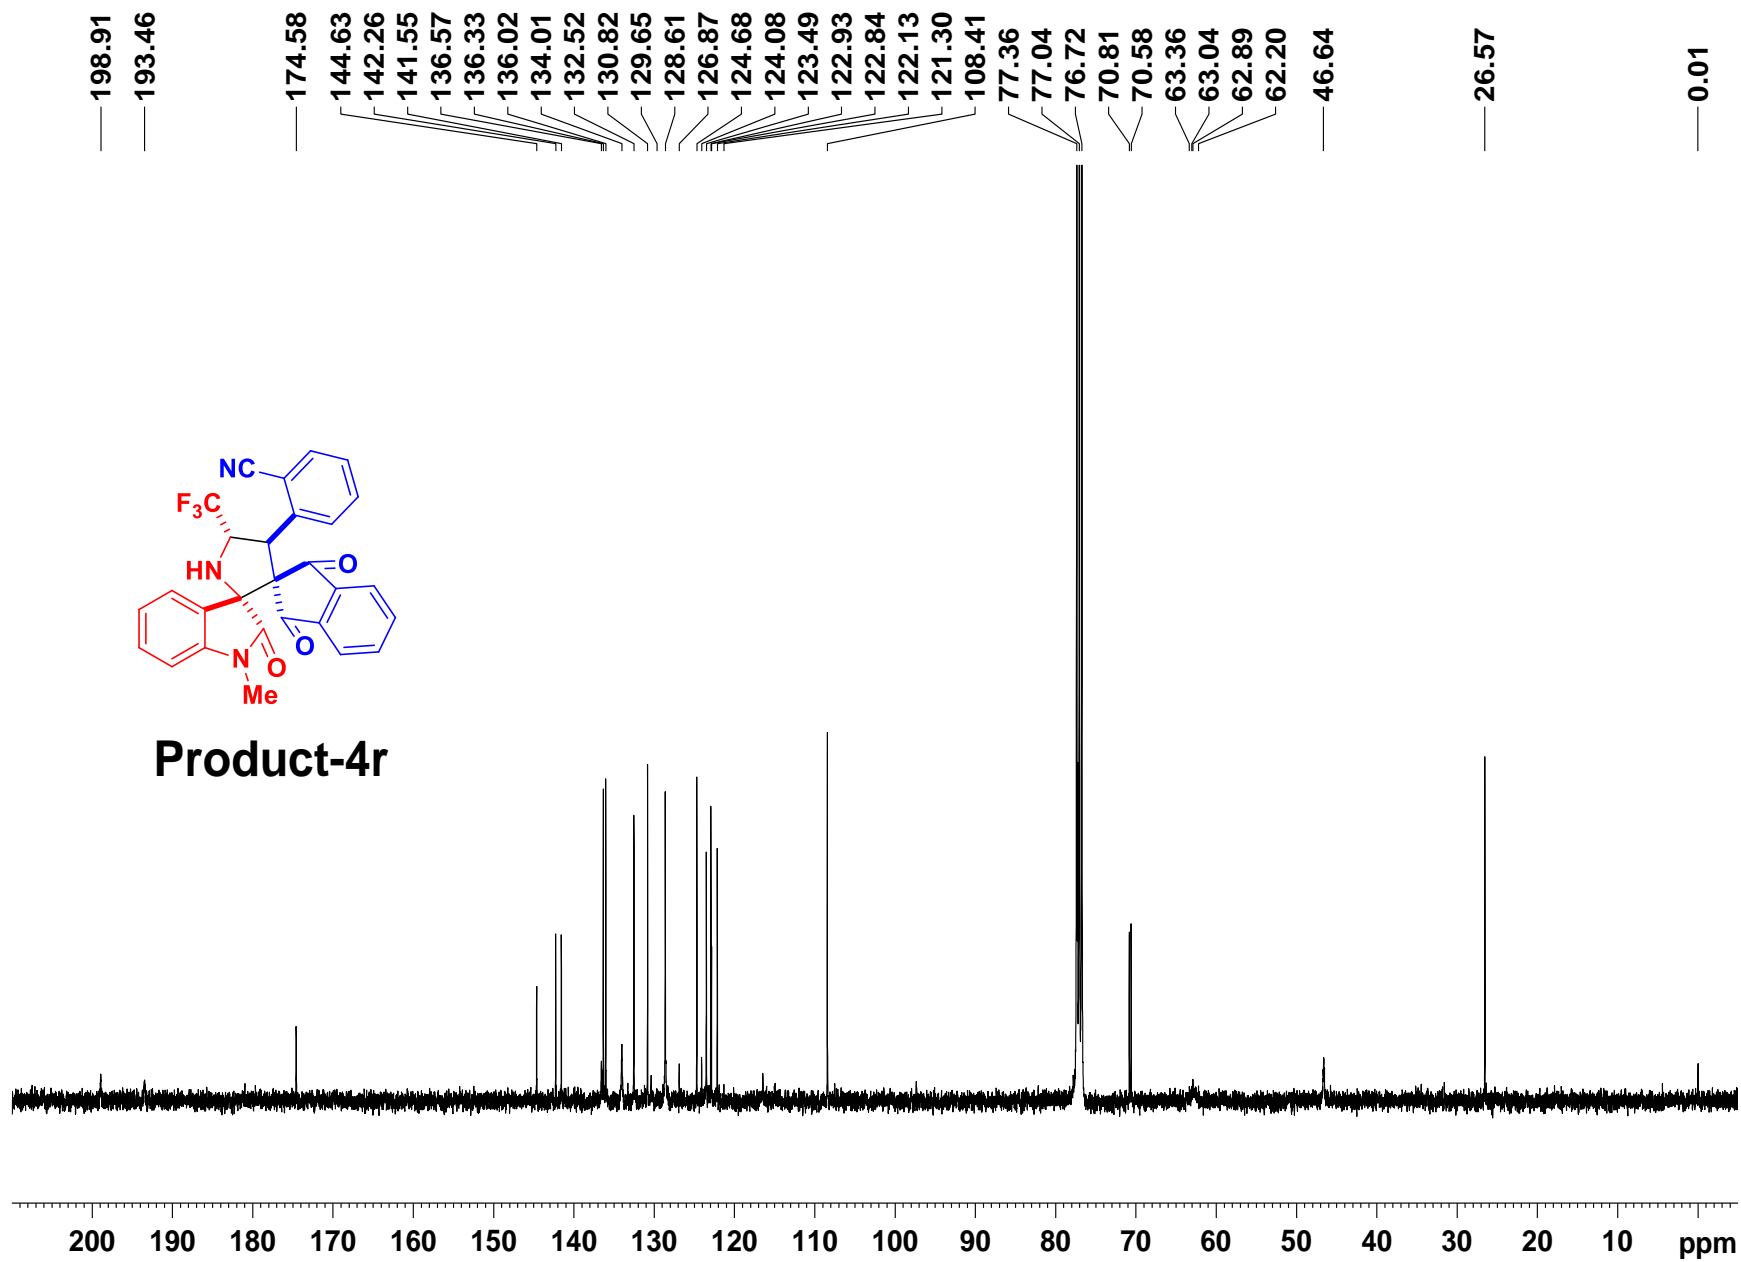

-72.83  
-73.83

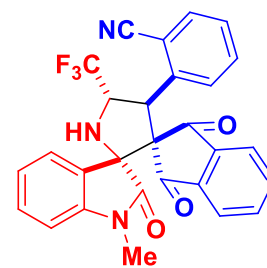

**Product-4r**

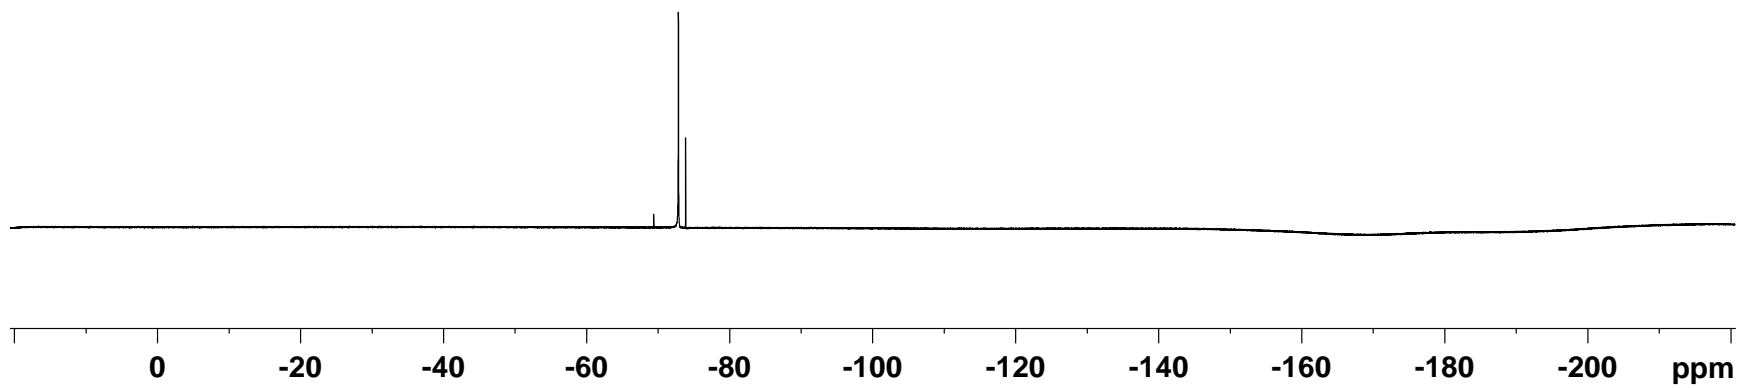



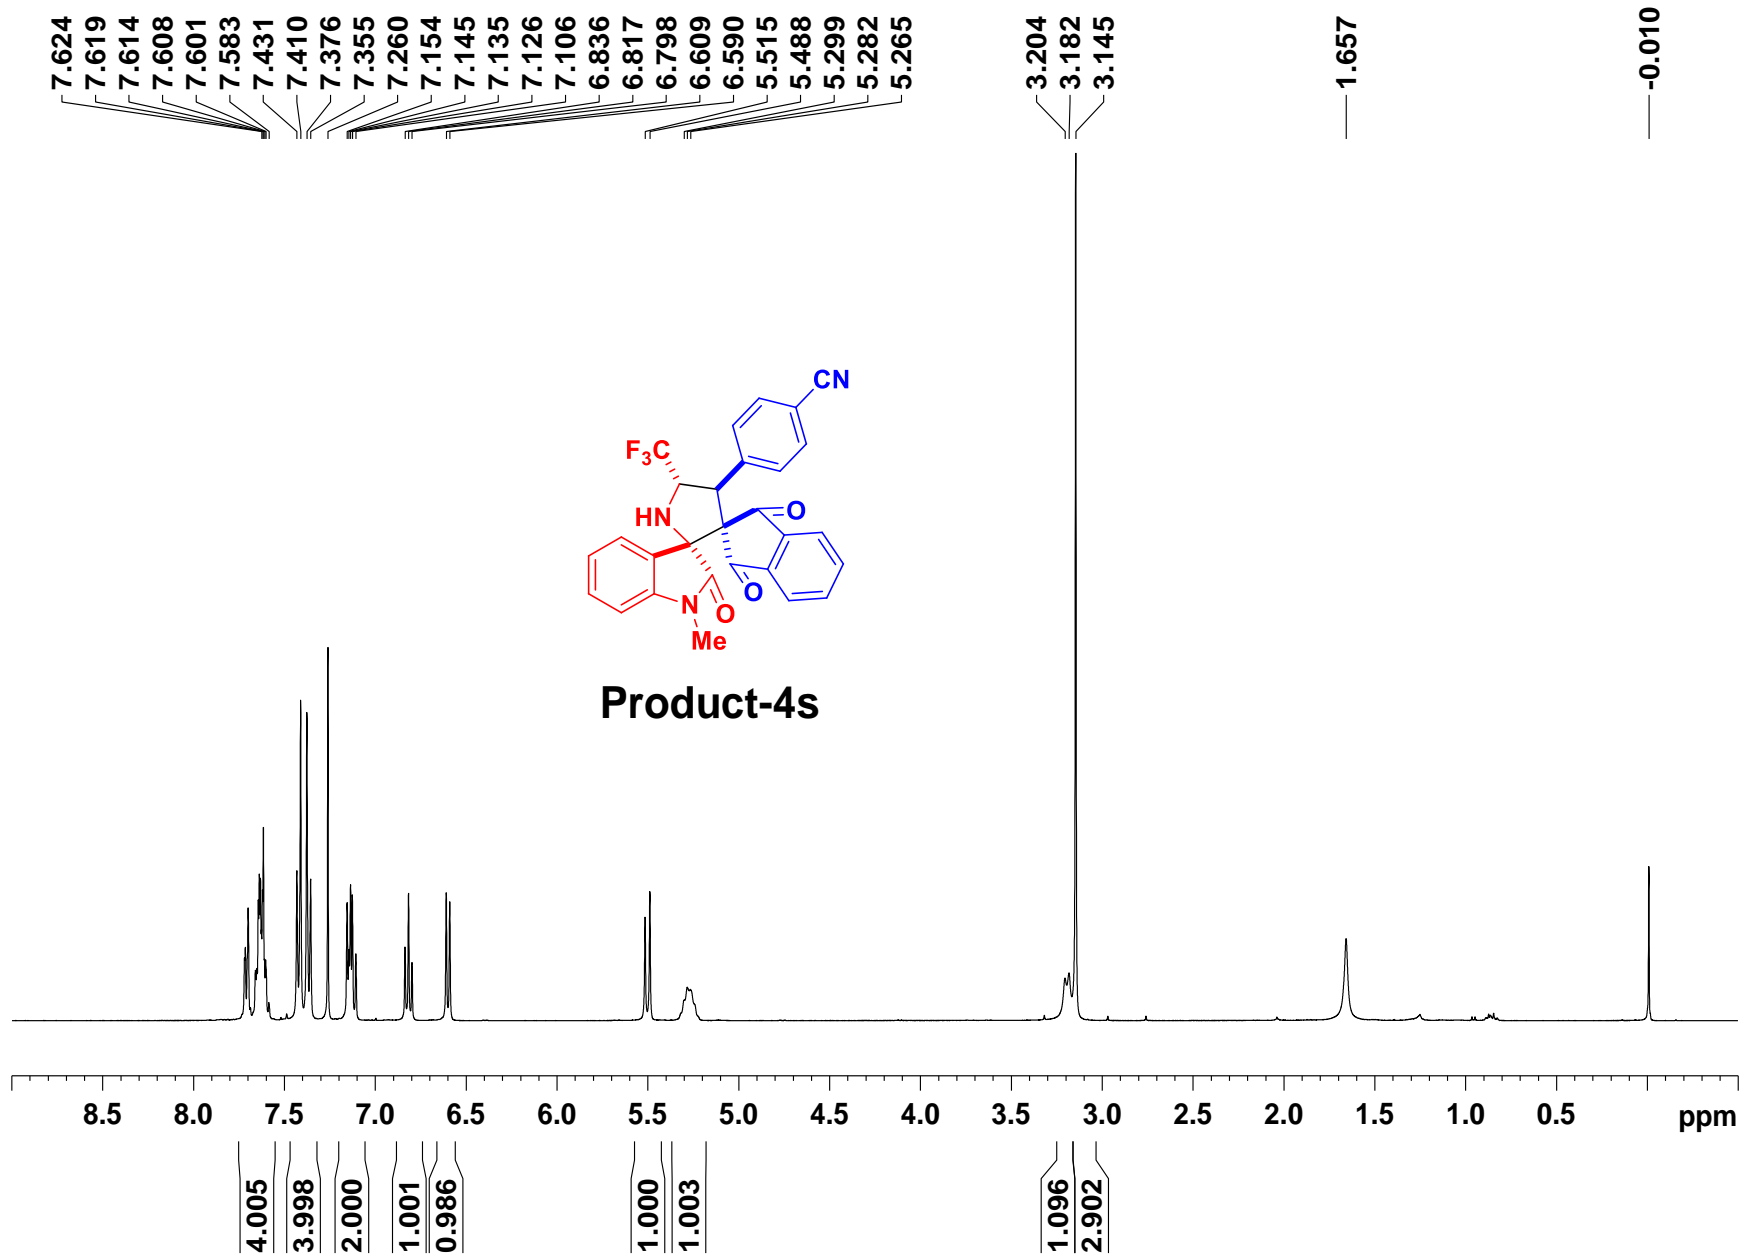

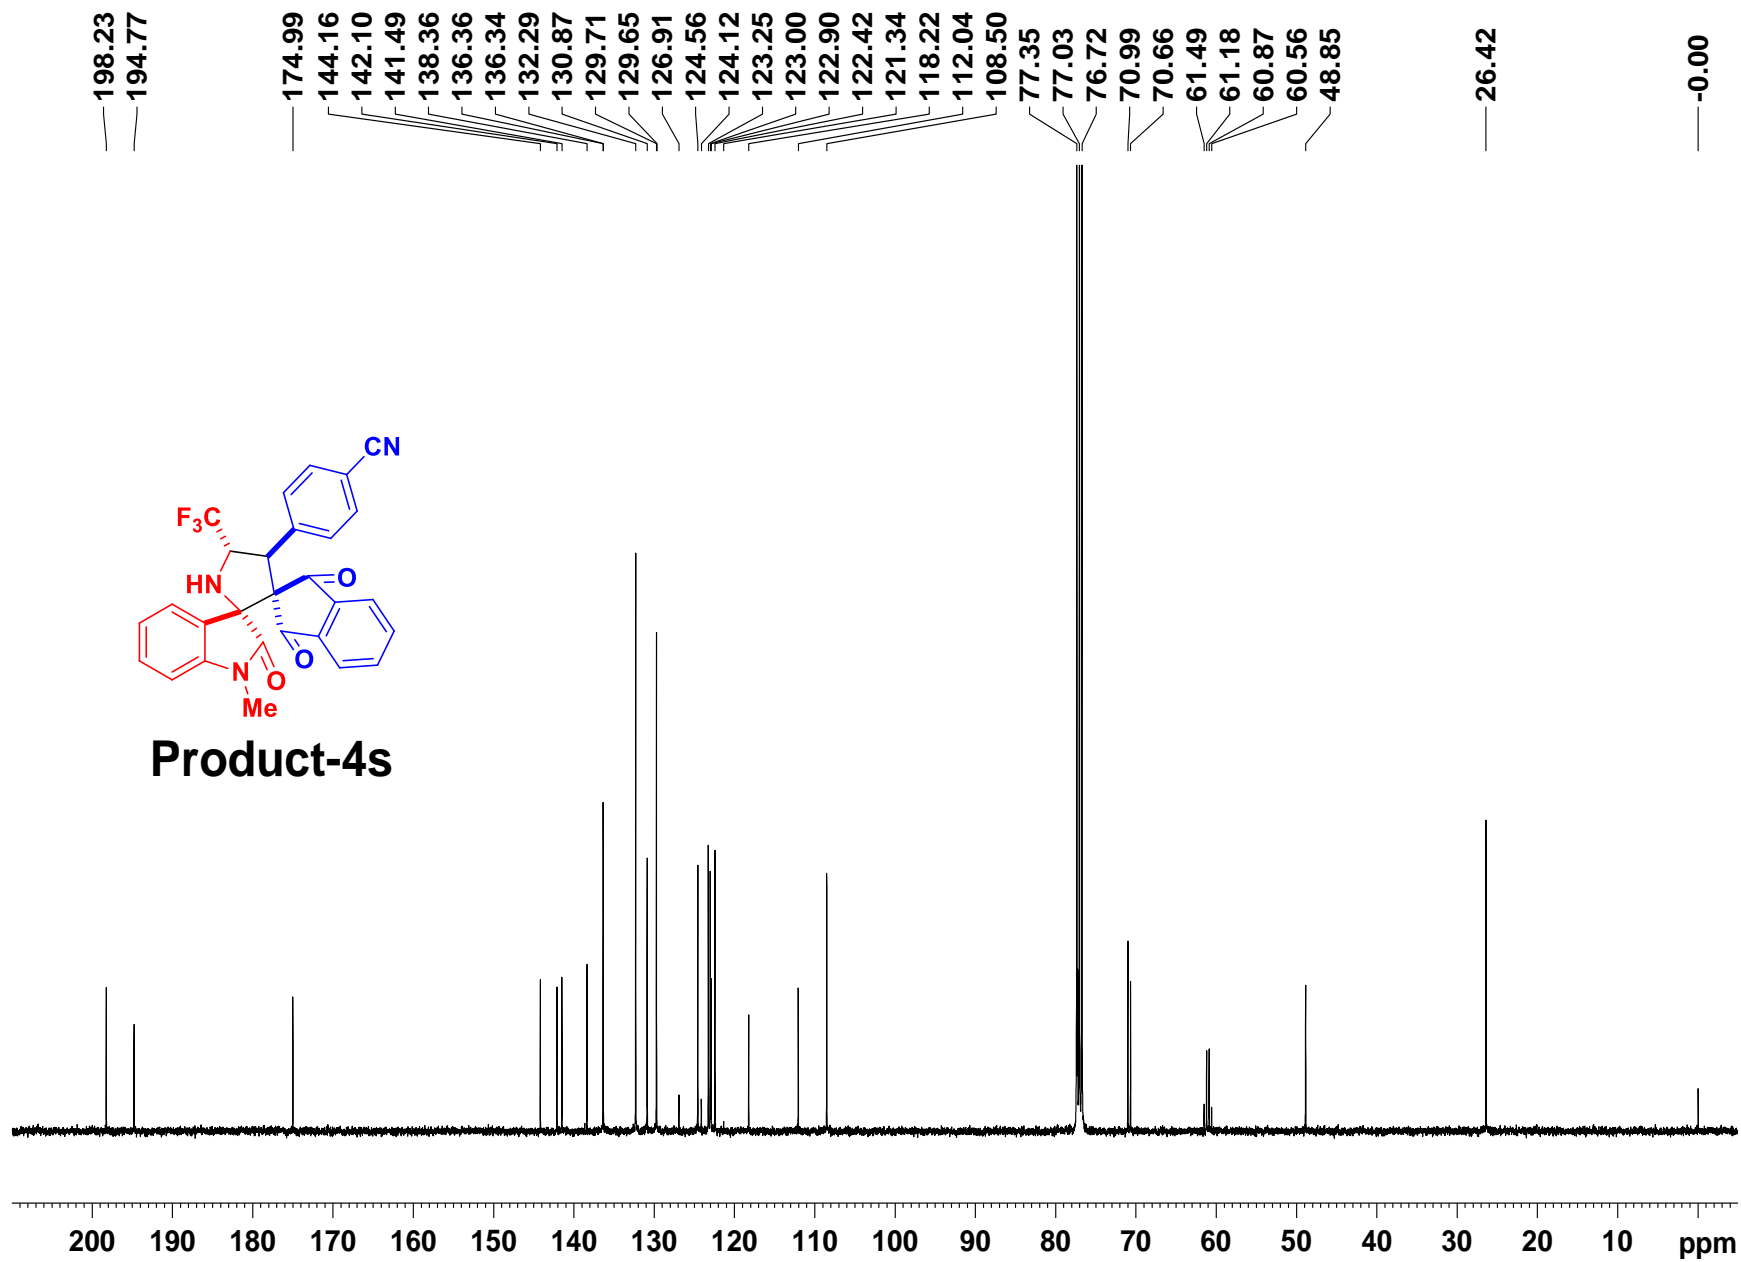

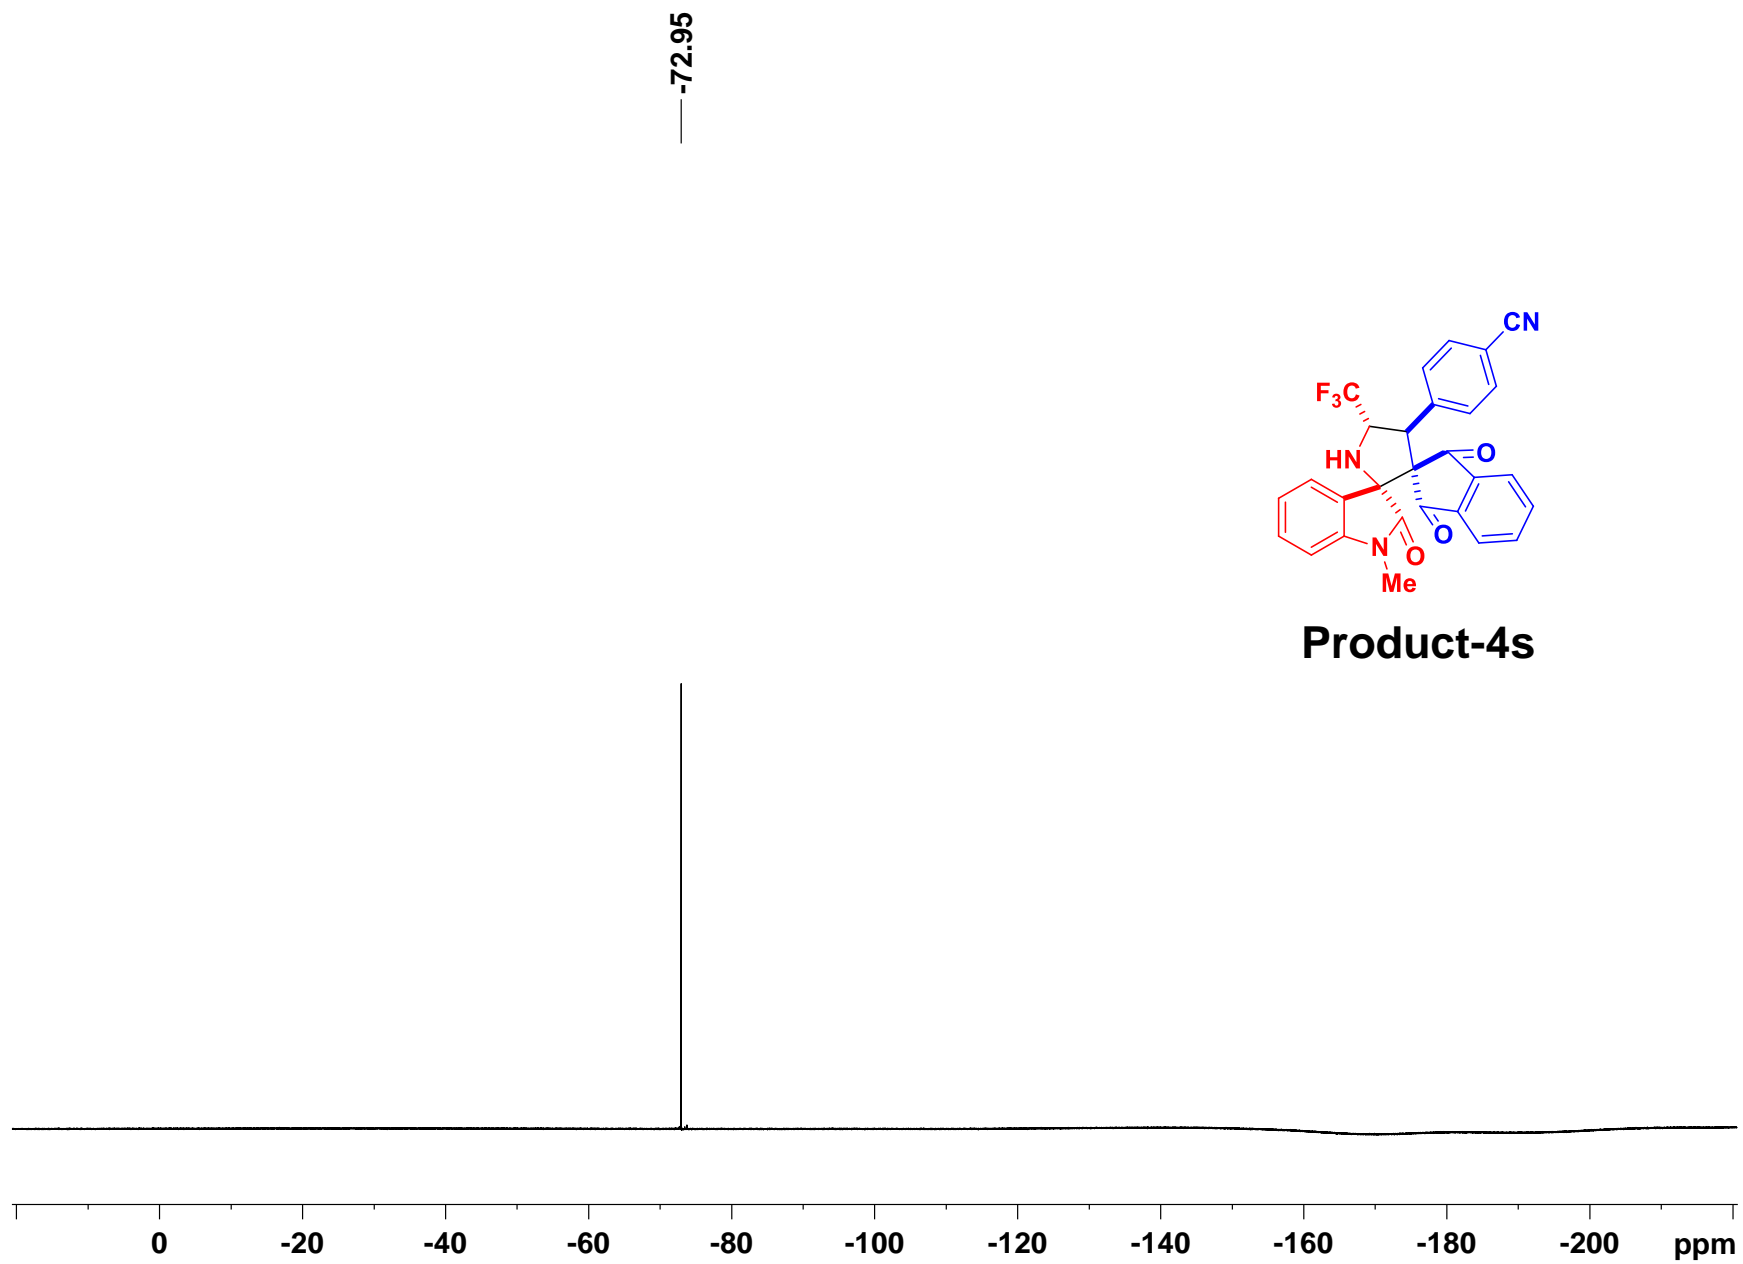

S75

7.645  
7.628  
7.608  
7.592  
7.578  
7.300  
7.264  
7.244  
7.195  
7.177  
7.159  
7.138  
7.119  
7.101  
7.005  
6.831  
6.813  
6.793  
6.601  
6.583  
5.432  
5.406  
5.229  
5.211

3.152

2.078

1.586

1.256

0.880

-0.000

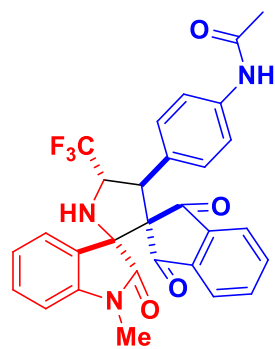

**Product-4t**

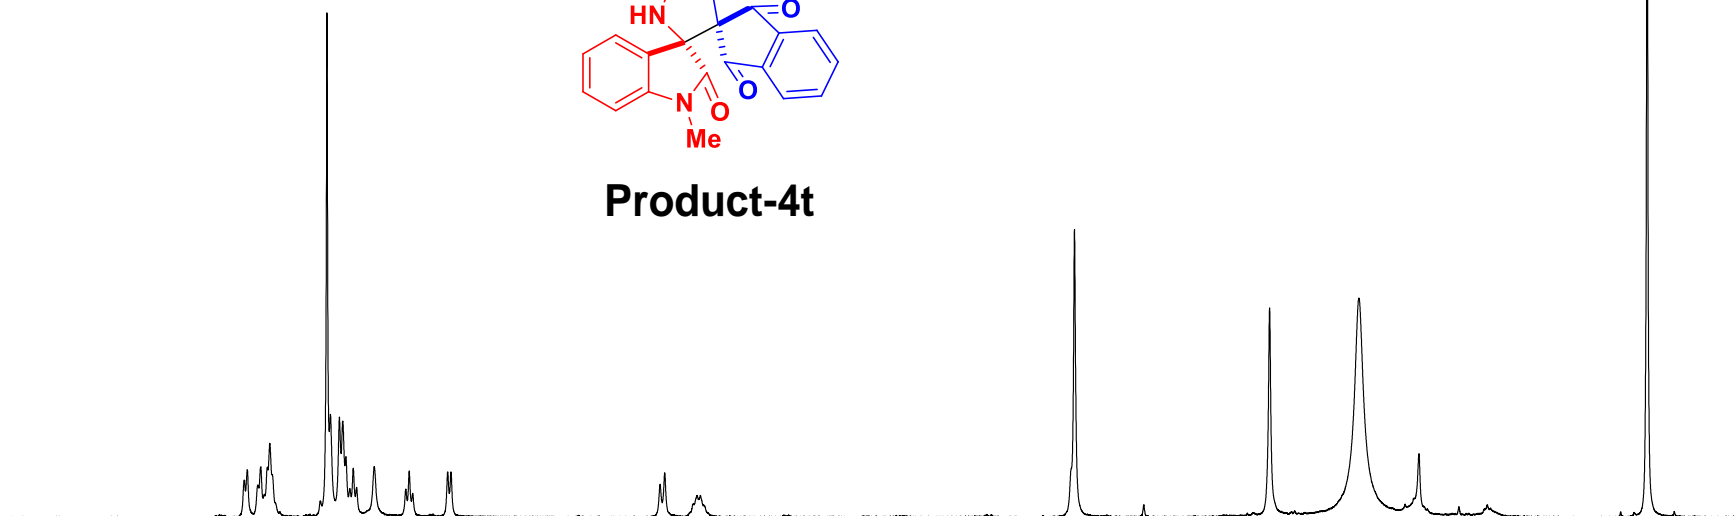

8.5 8.0 7.5 7.0 6.5 6.0 5.5 5.0 4.5 4.0 3.5 3.0 2.5 2.0 1.5 1.0 0.5 ppm

4.061  
6.078  
1.070  
1.058  
1.063

1.000  
1.040

3.944

3.119

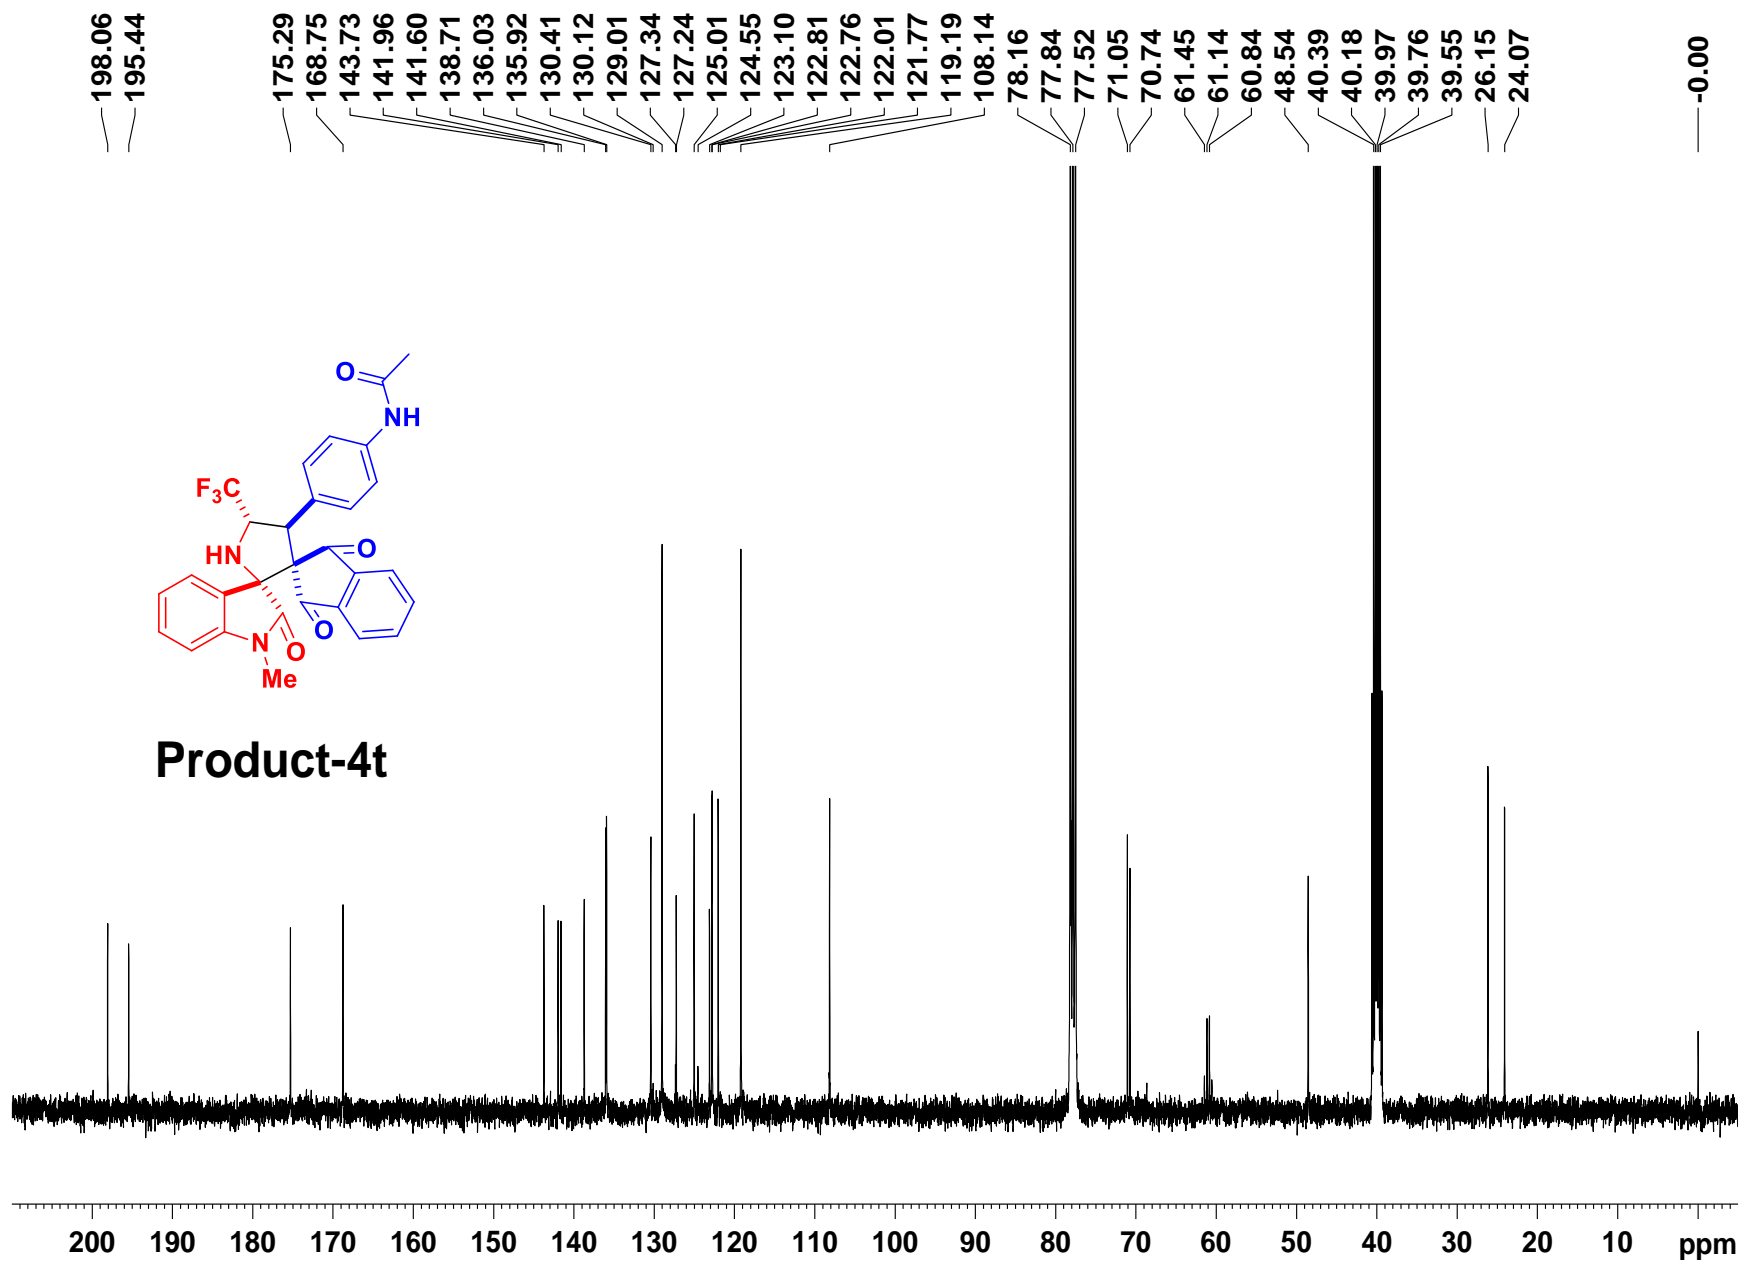

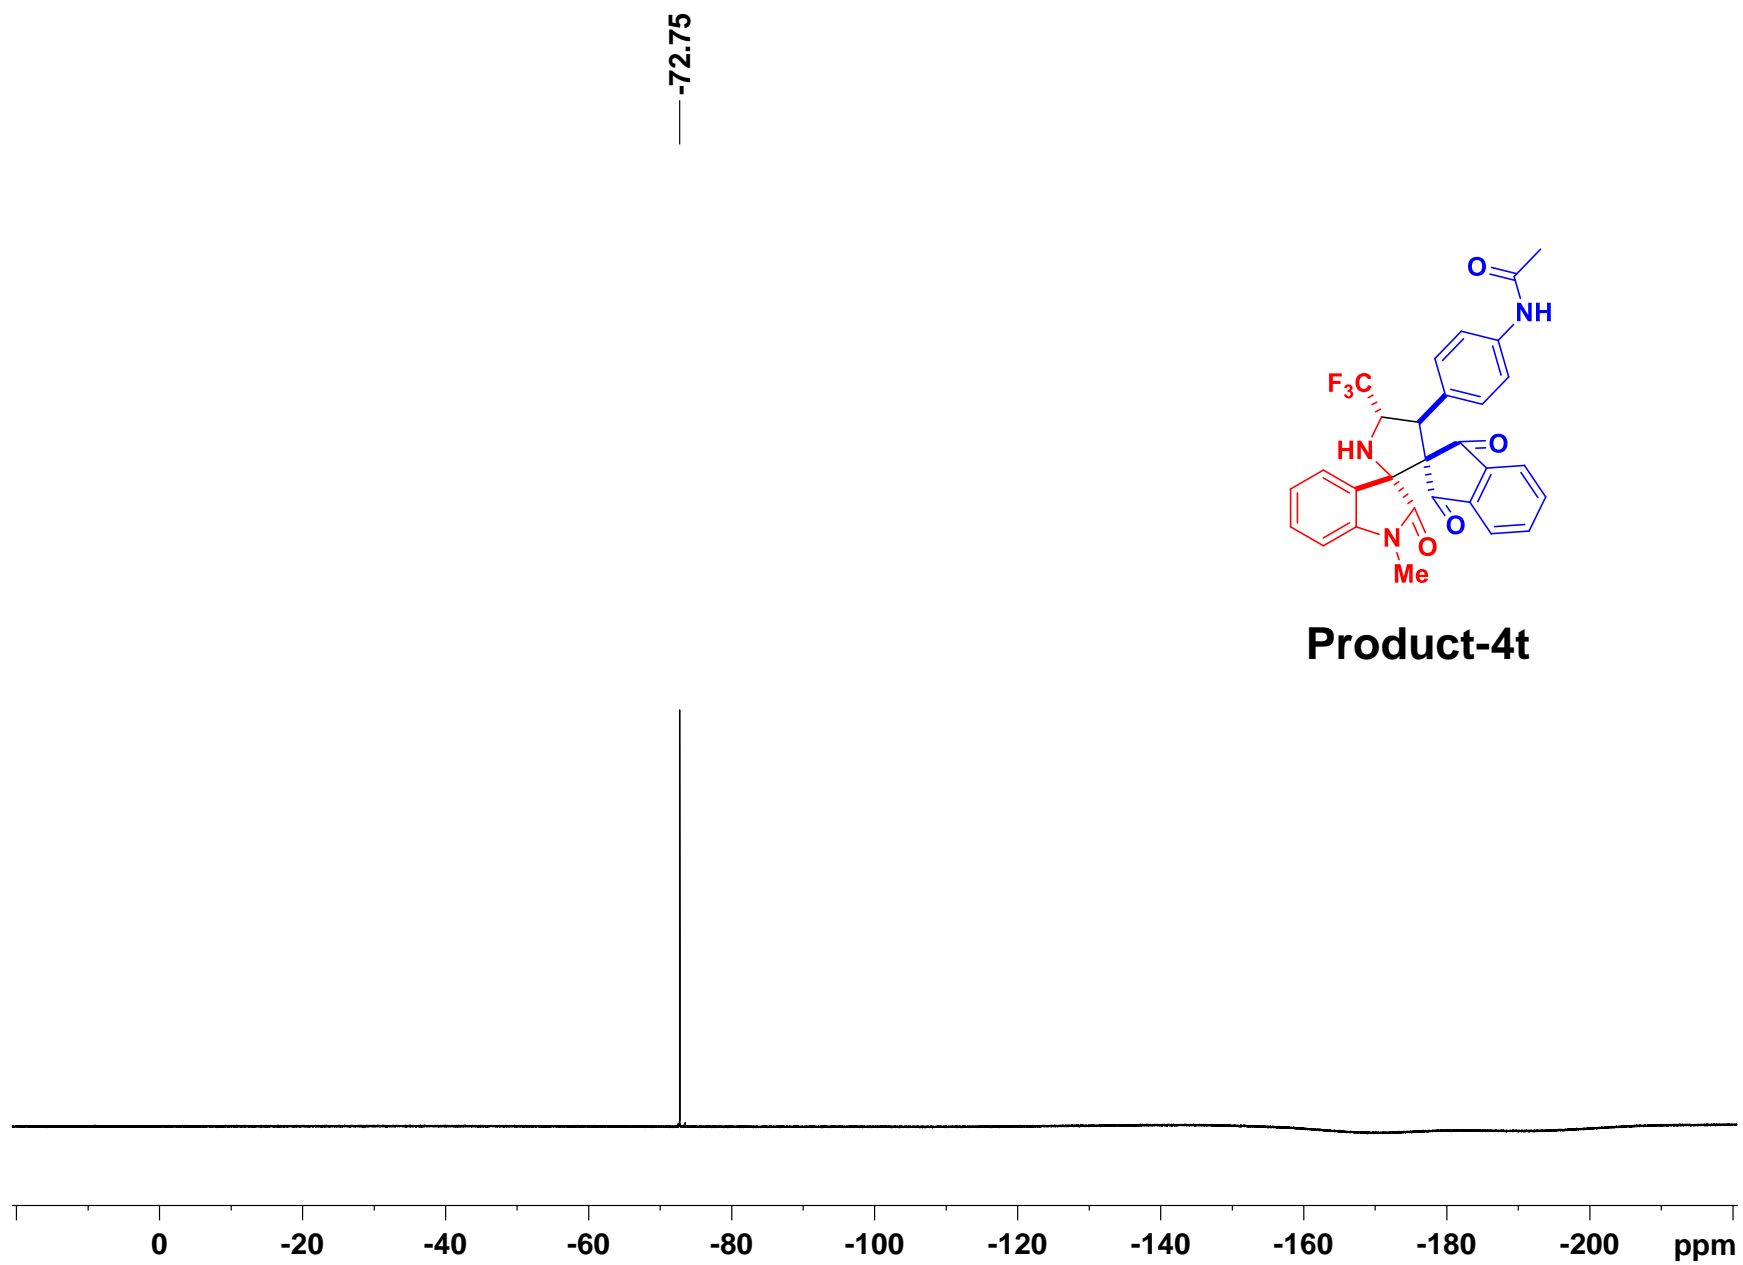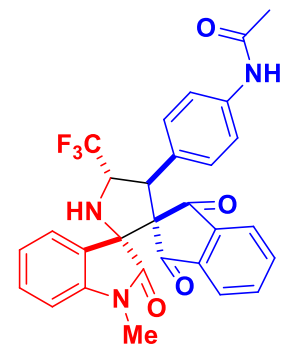

**Product-4t**

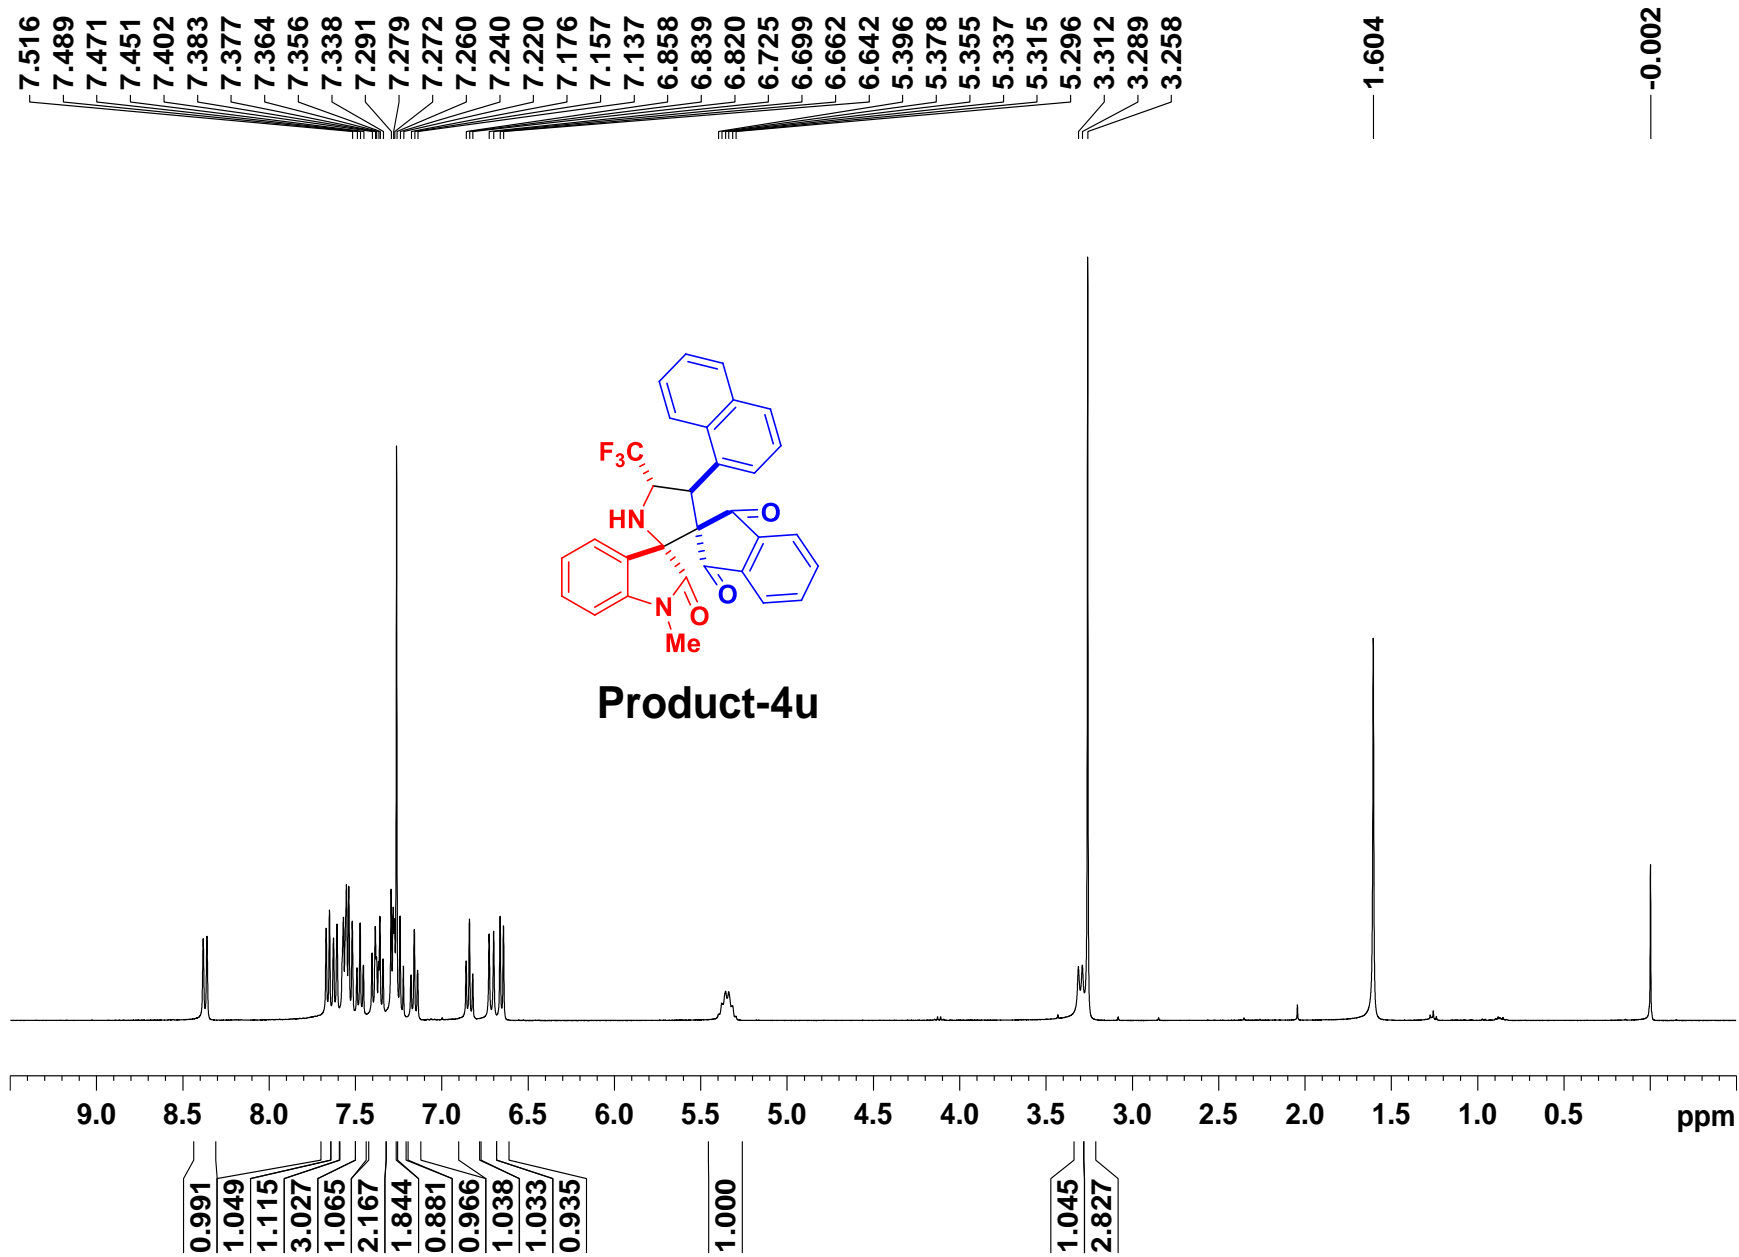

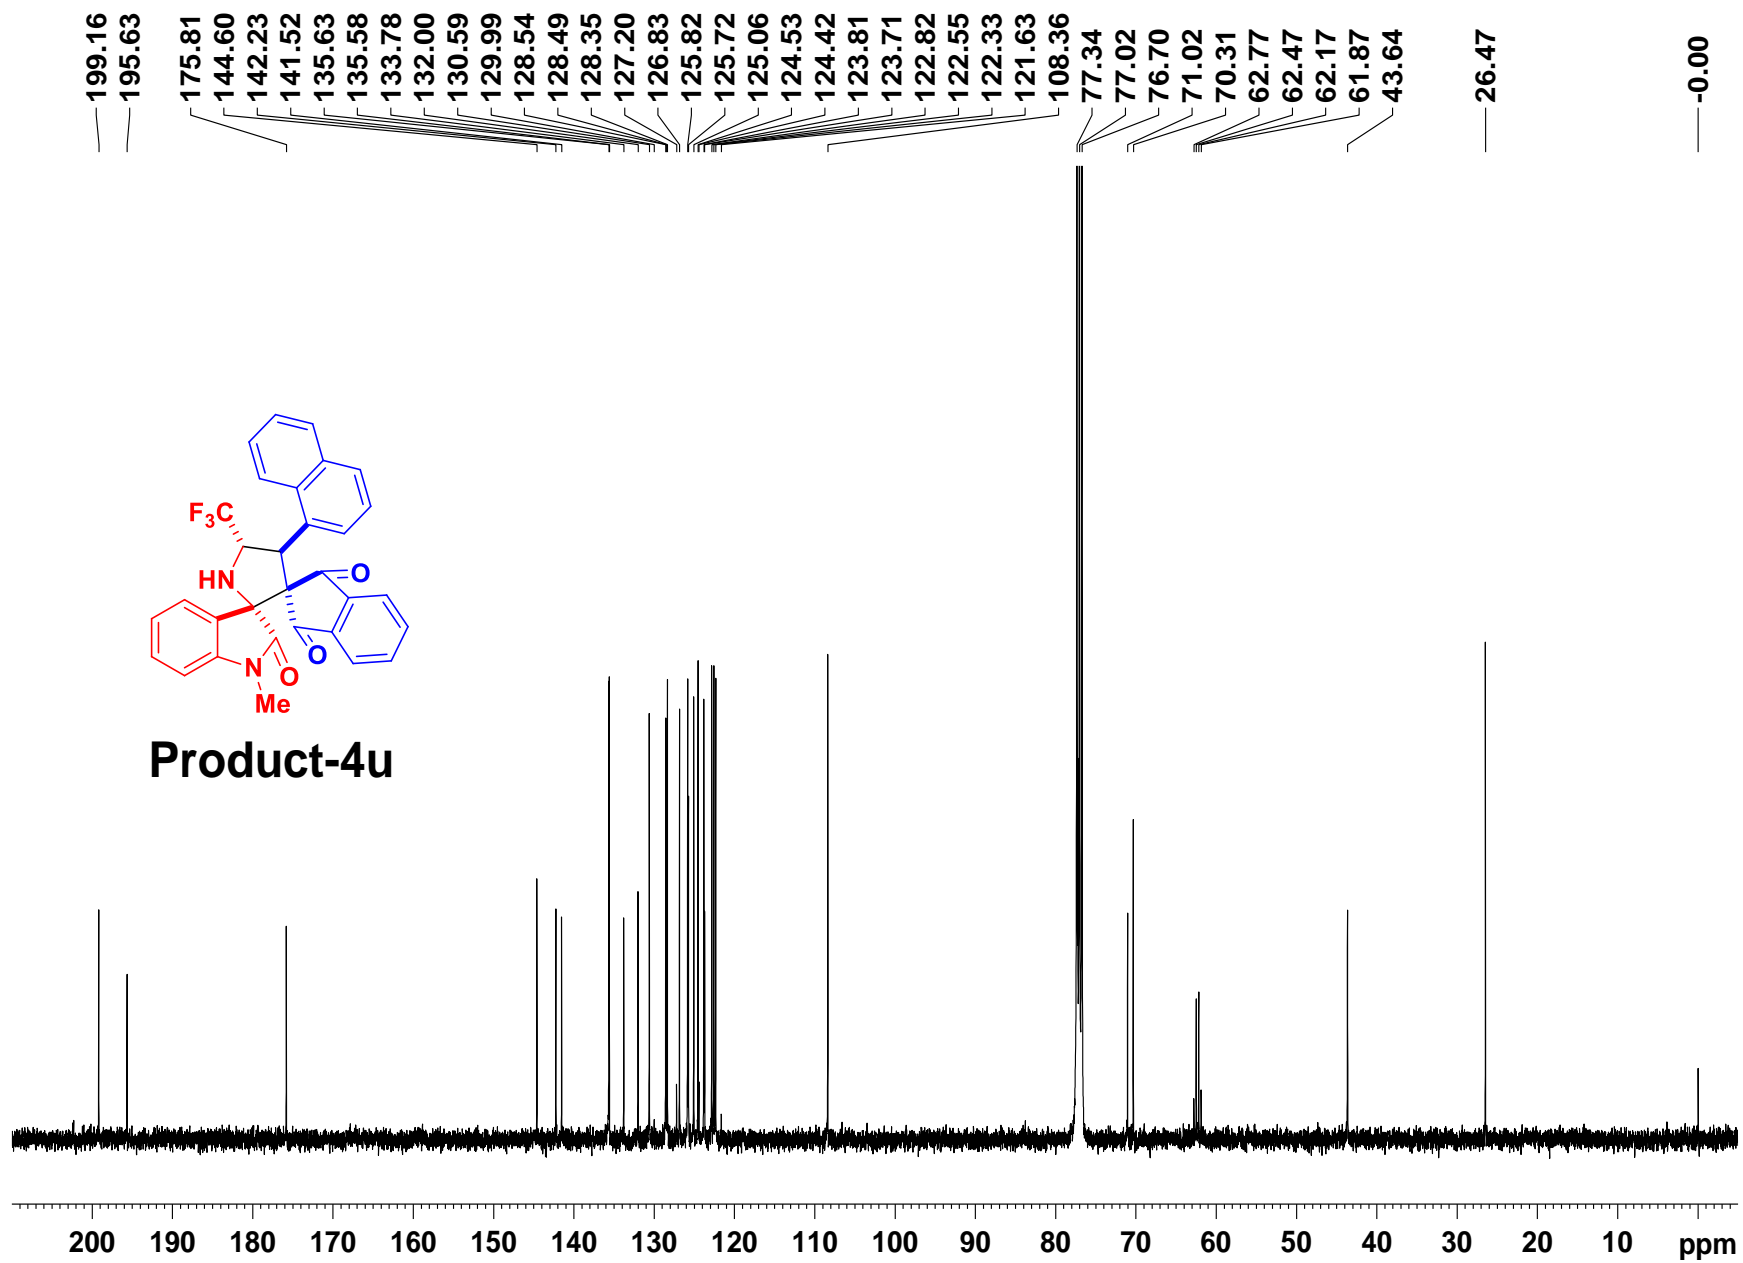



—72.74

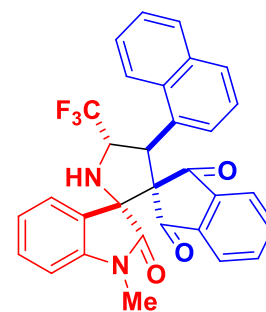

**Product-4u**

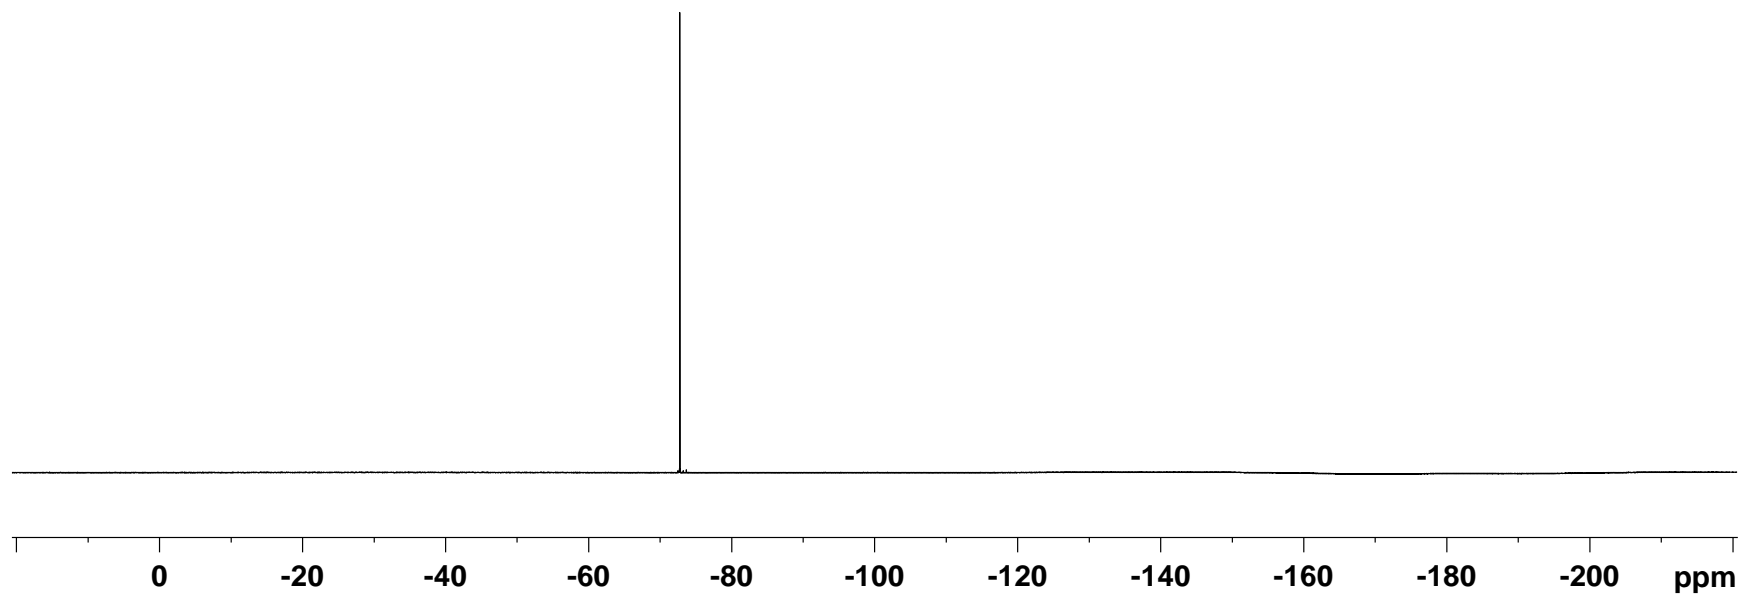

S81

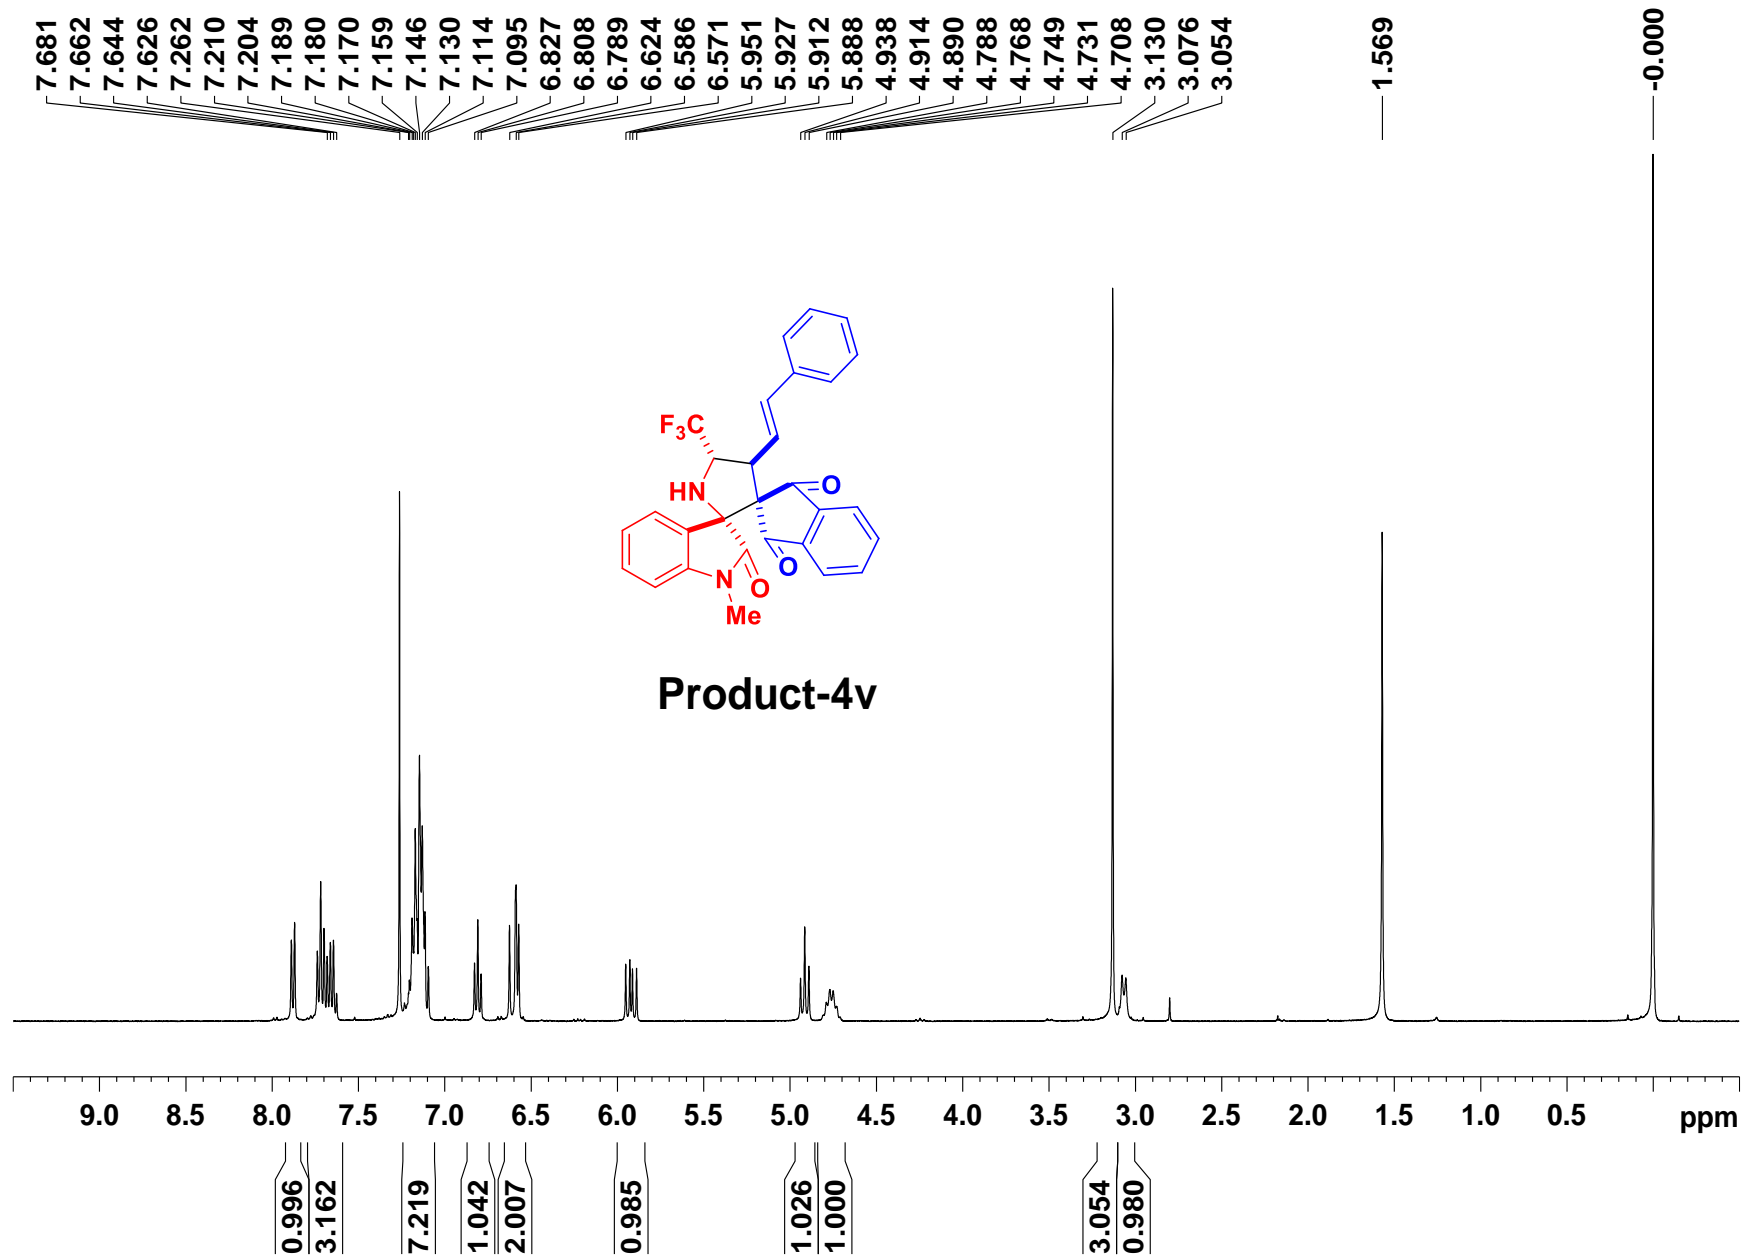

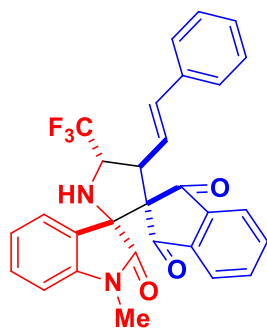

**Product-4v**

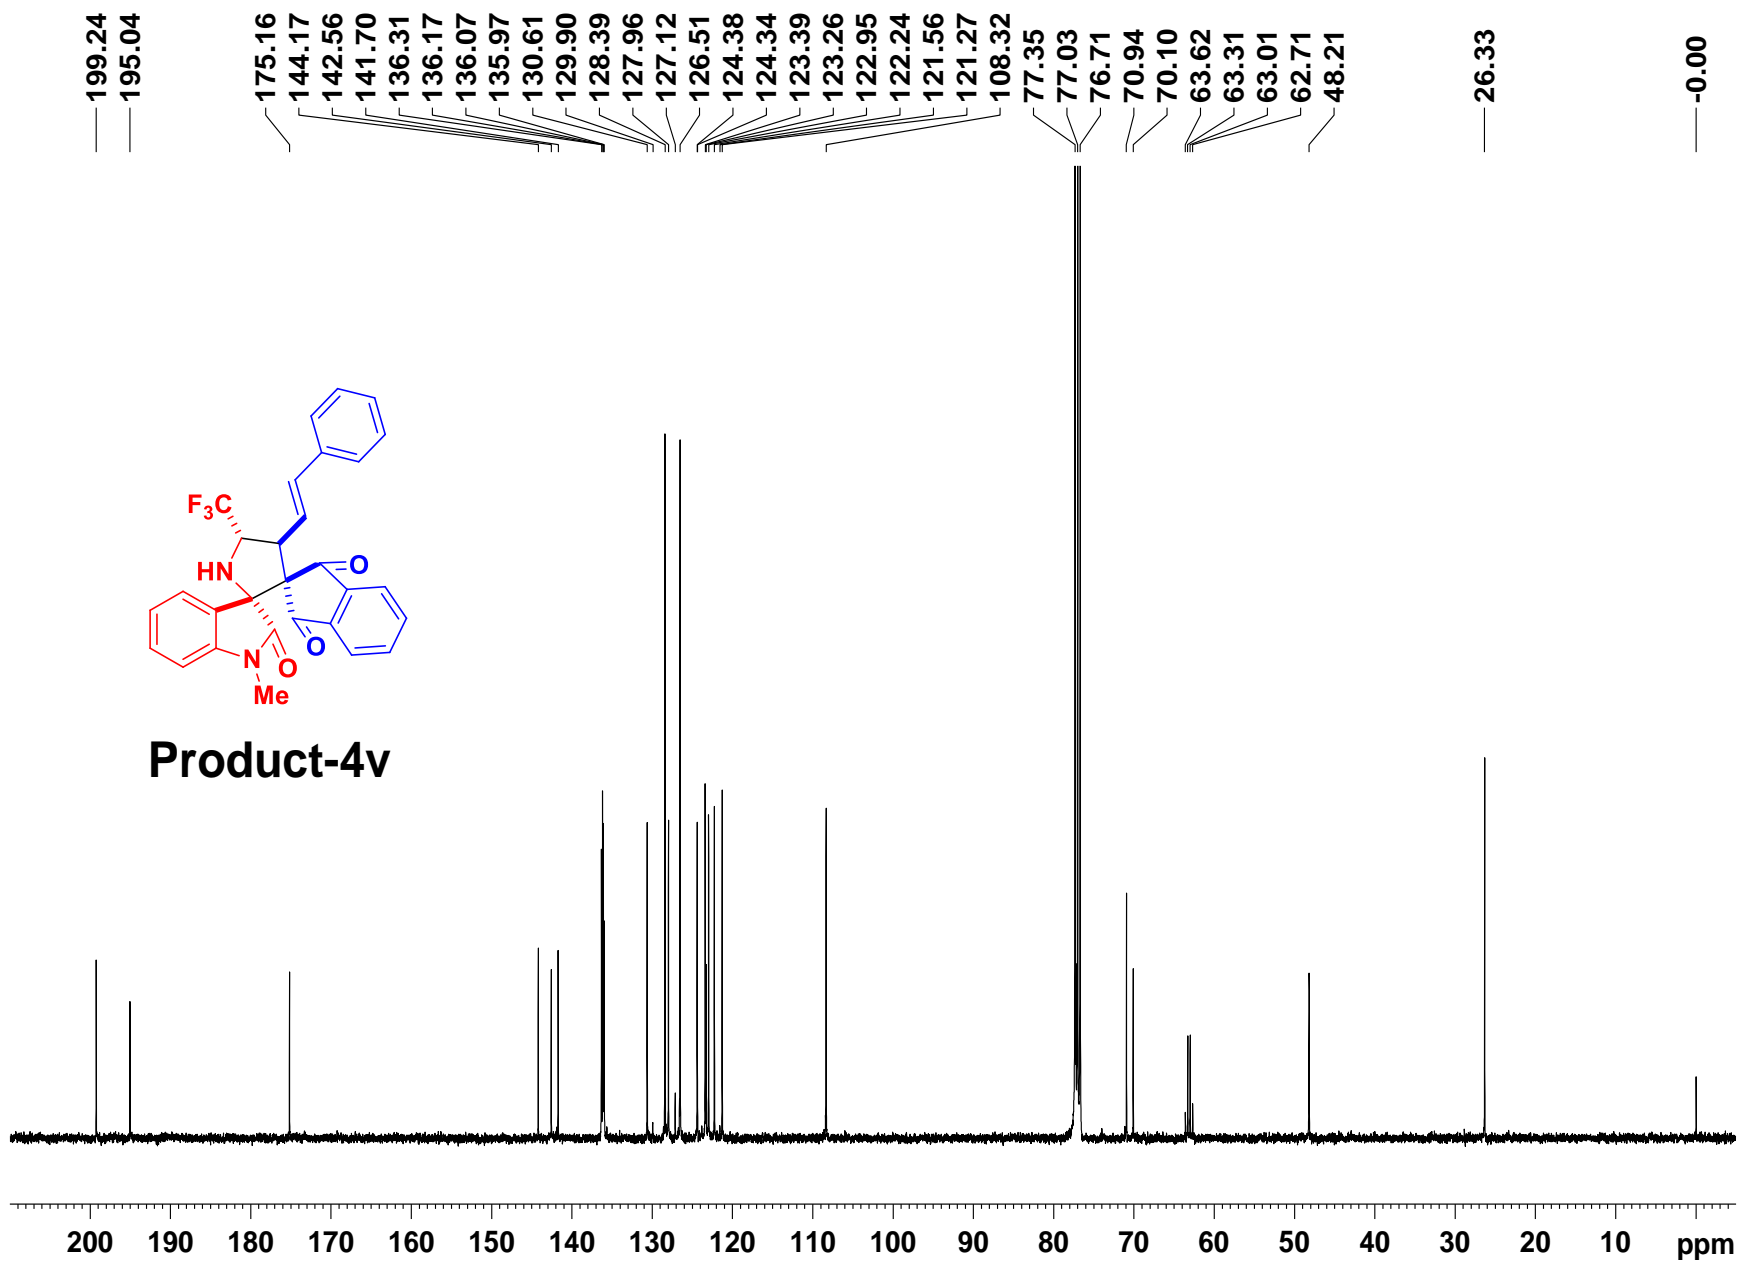

—72.61

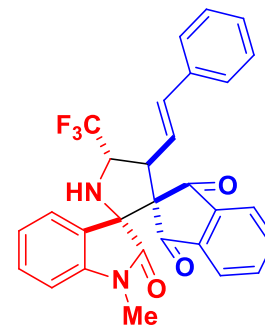

**Product-4v**

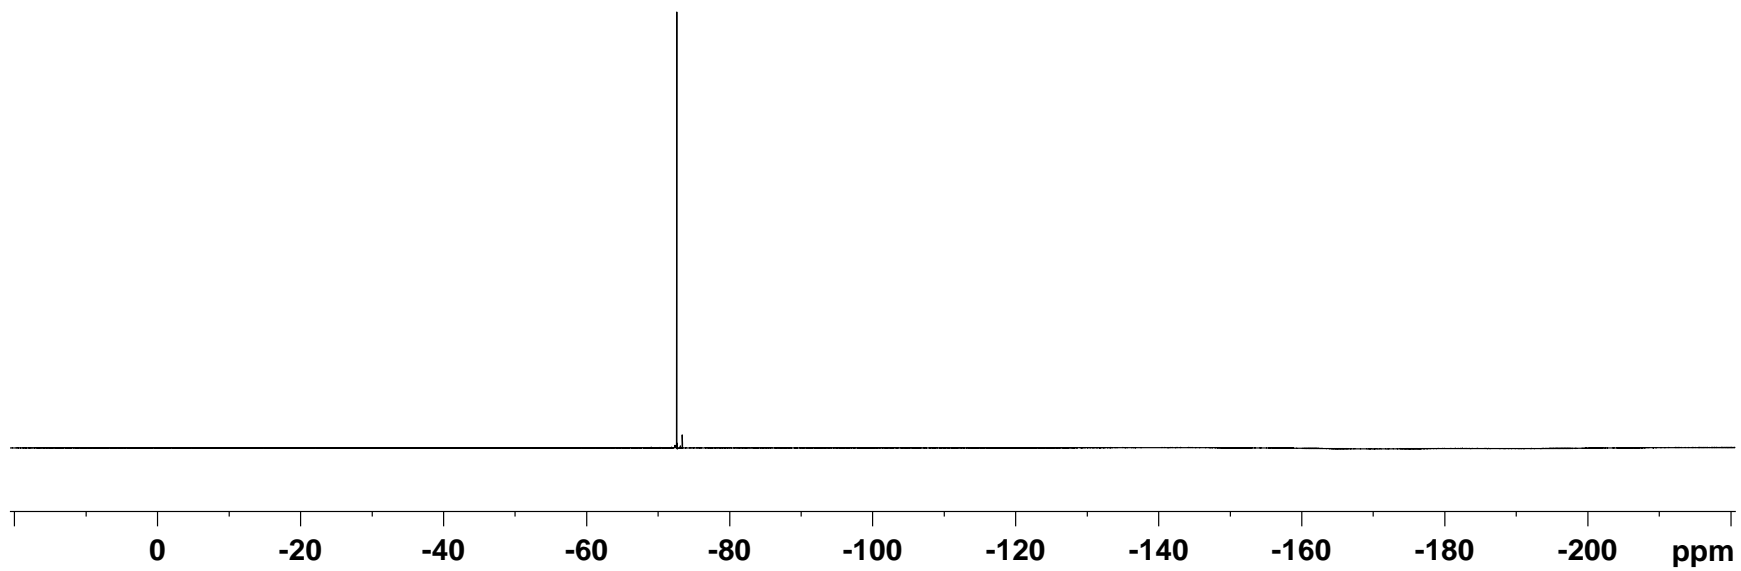

S84

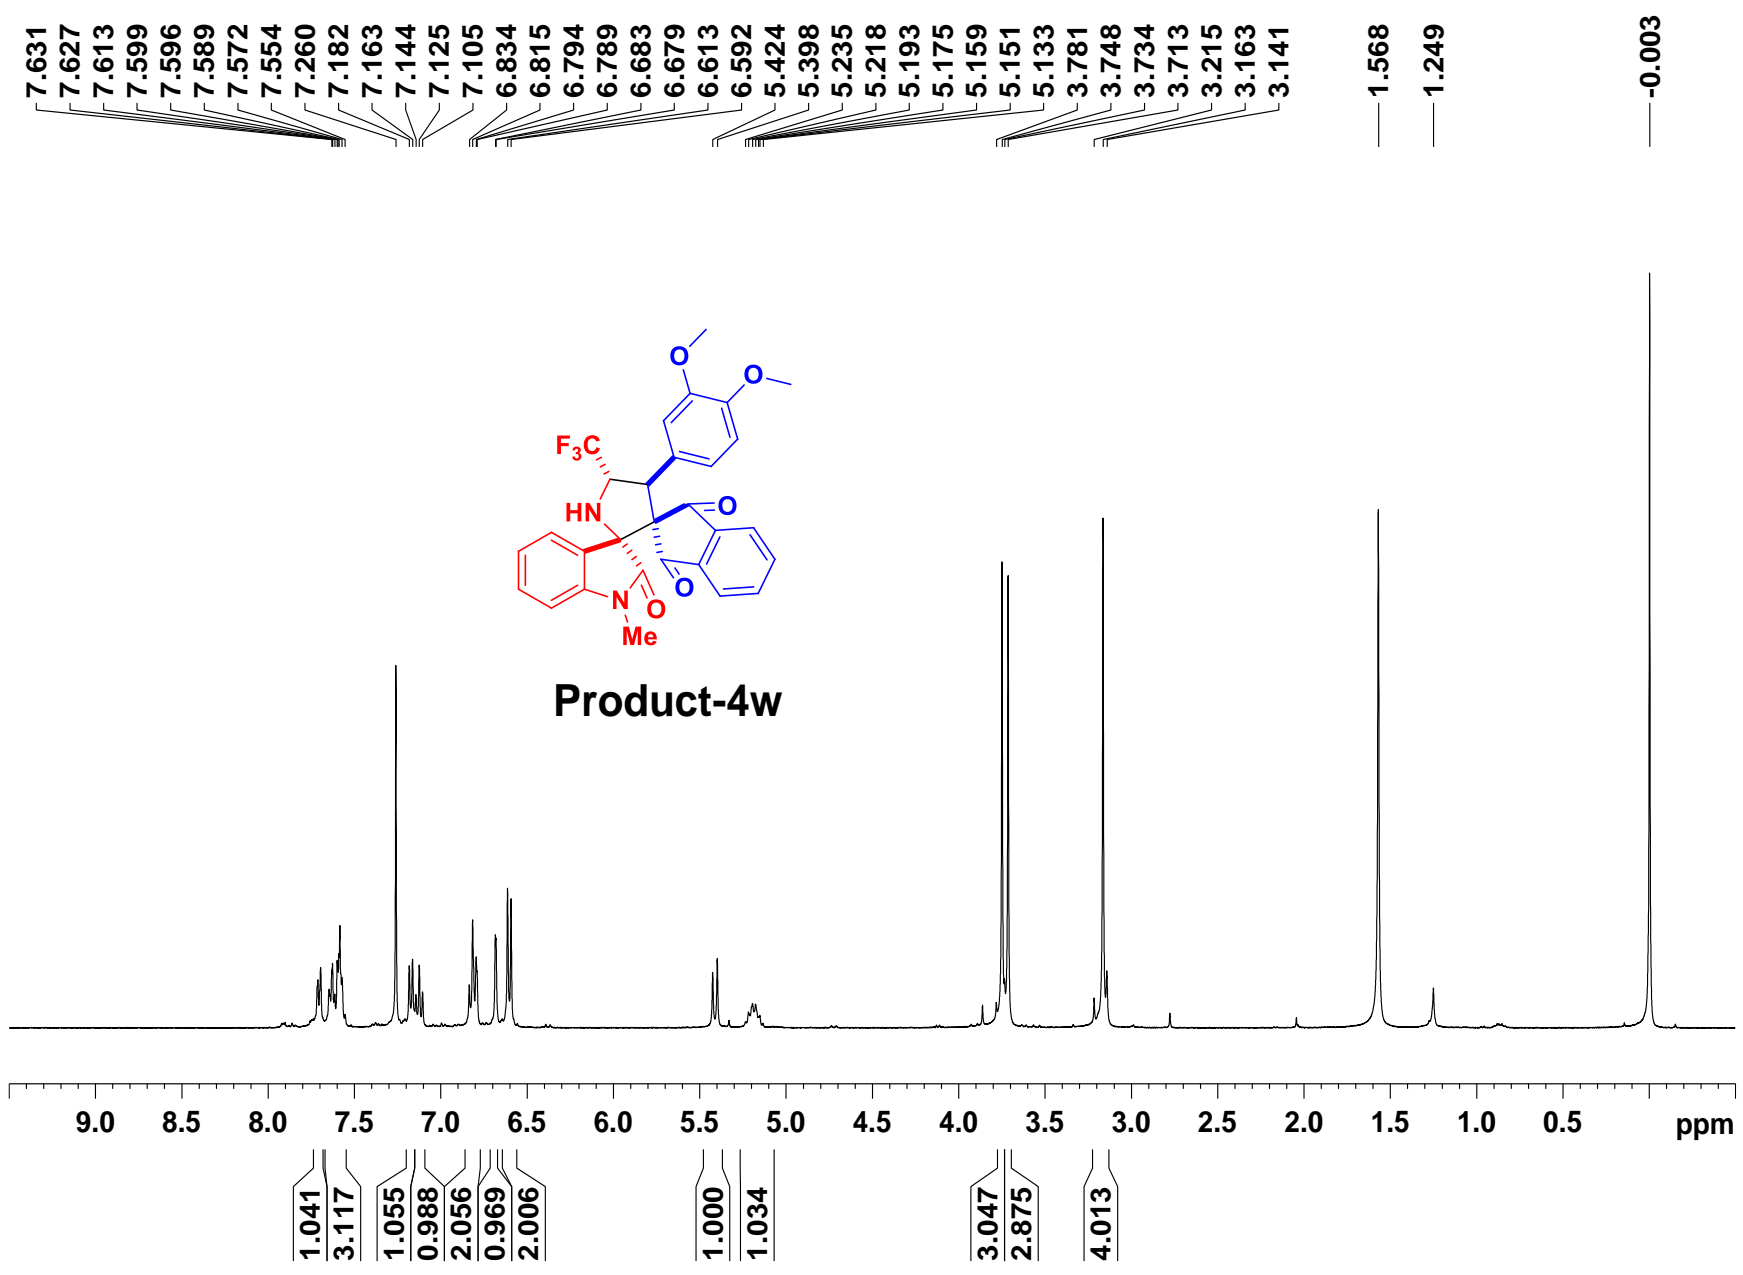

199.14  
195.84

175.49  
148.41  
144.28  
142.47  
141.78  
136.00  
135.97  
130.57  
129.97  
127.18  
124.80  
124.75  
124.40  
123.59  
123.02  
122.81  
122.30  
121.62  
120.79  
111.92  
110.81  
108.33  
77.36  
77.04  
76.73  
70.92  
70.50  
61.75  
61.45  
61.14  
60.84  
55.78  
55.61  
49.56

26.38

0.01

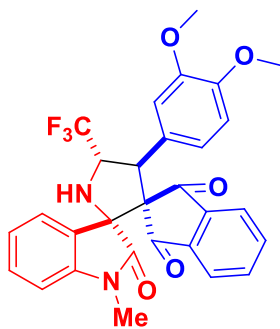

Product-4w

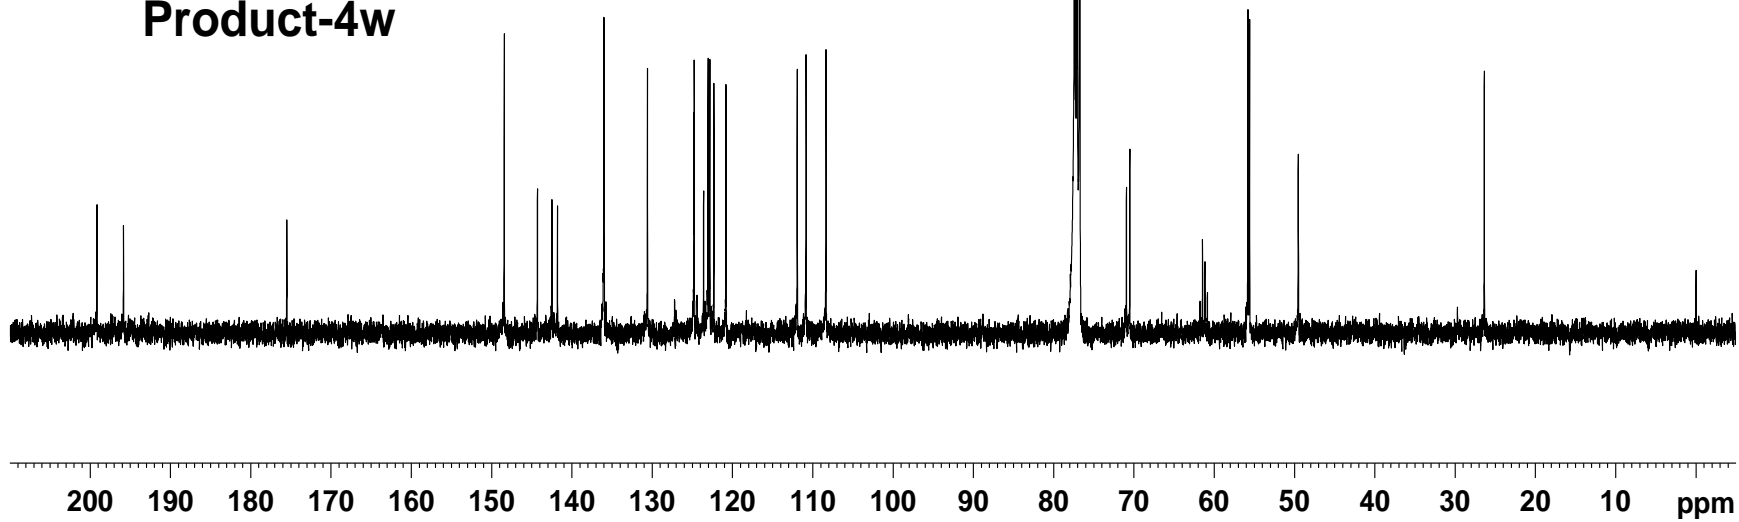

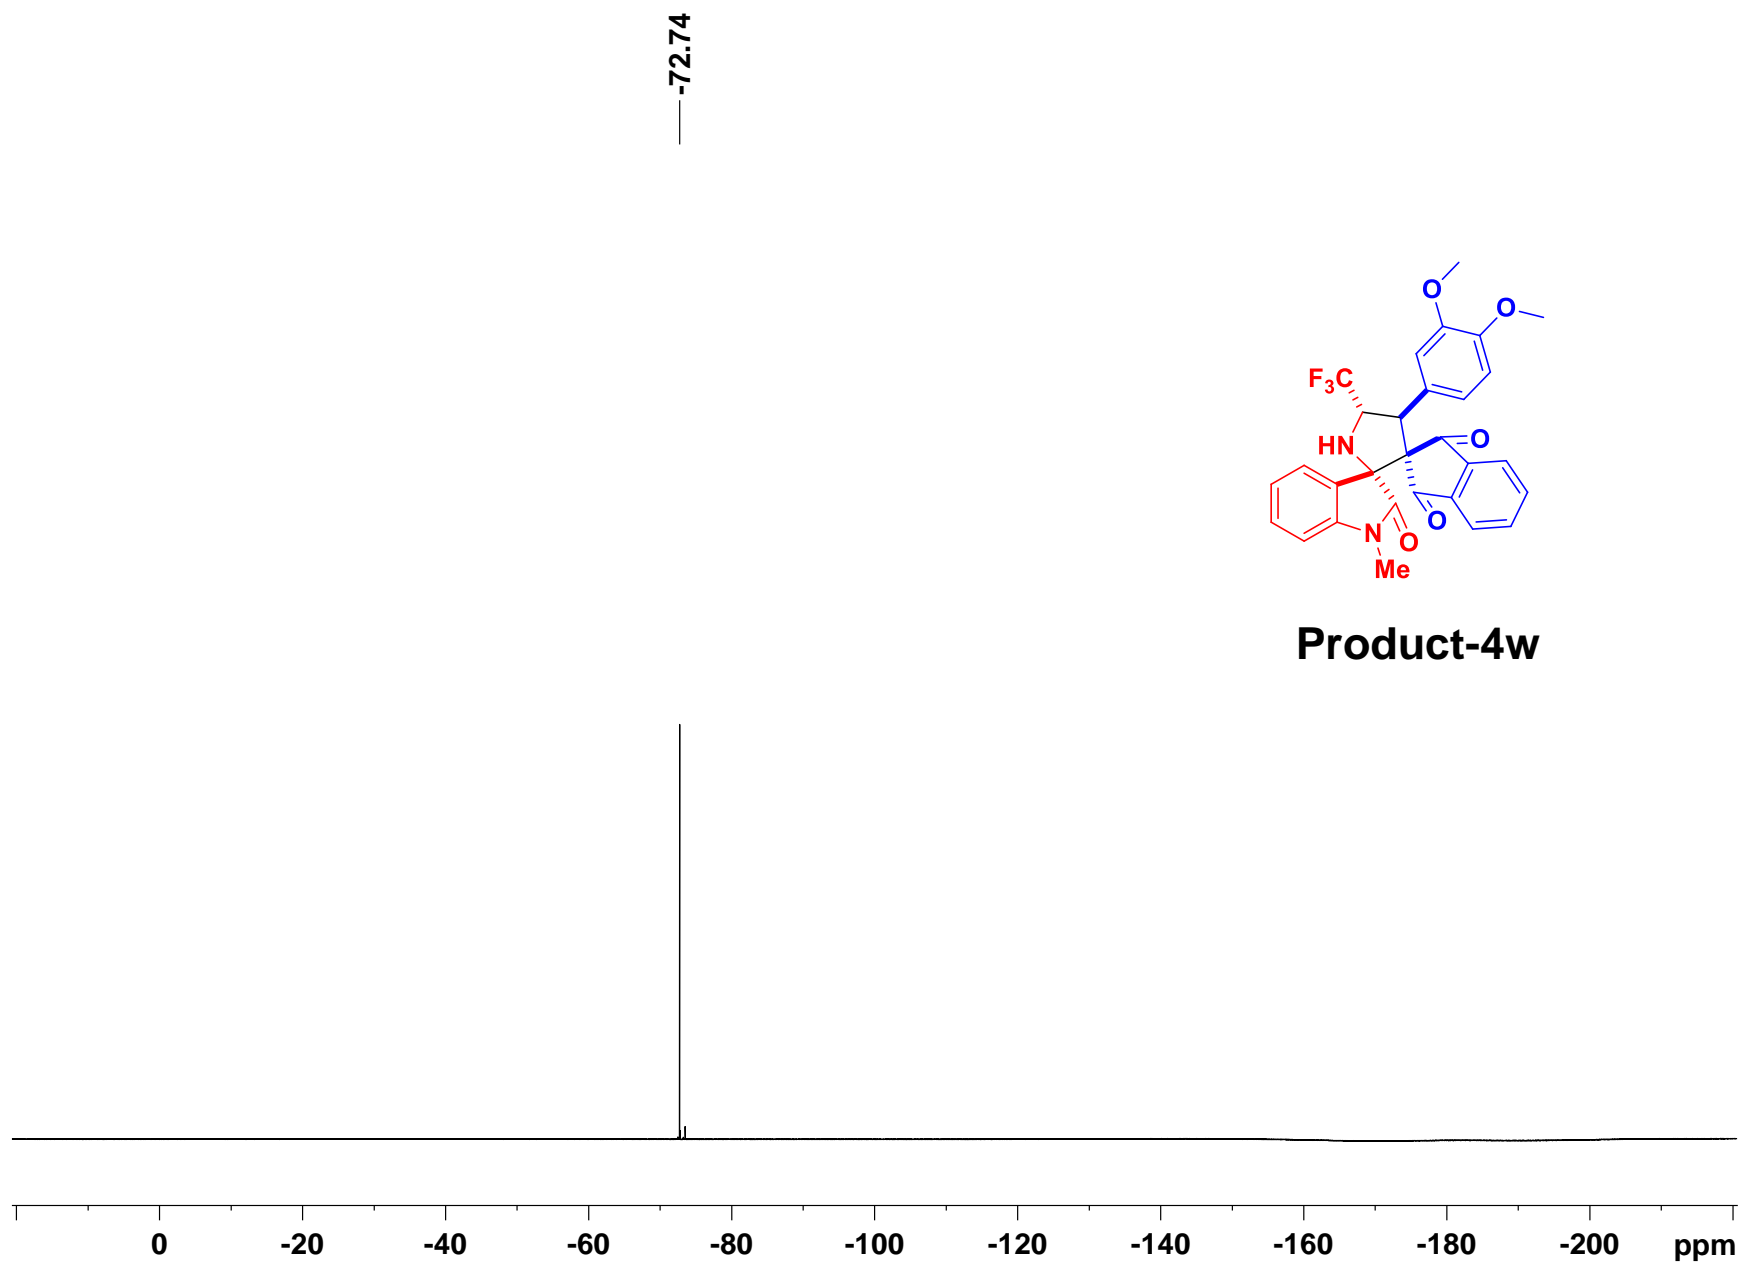

S87

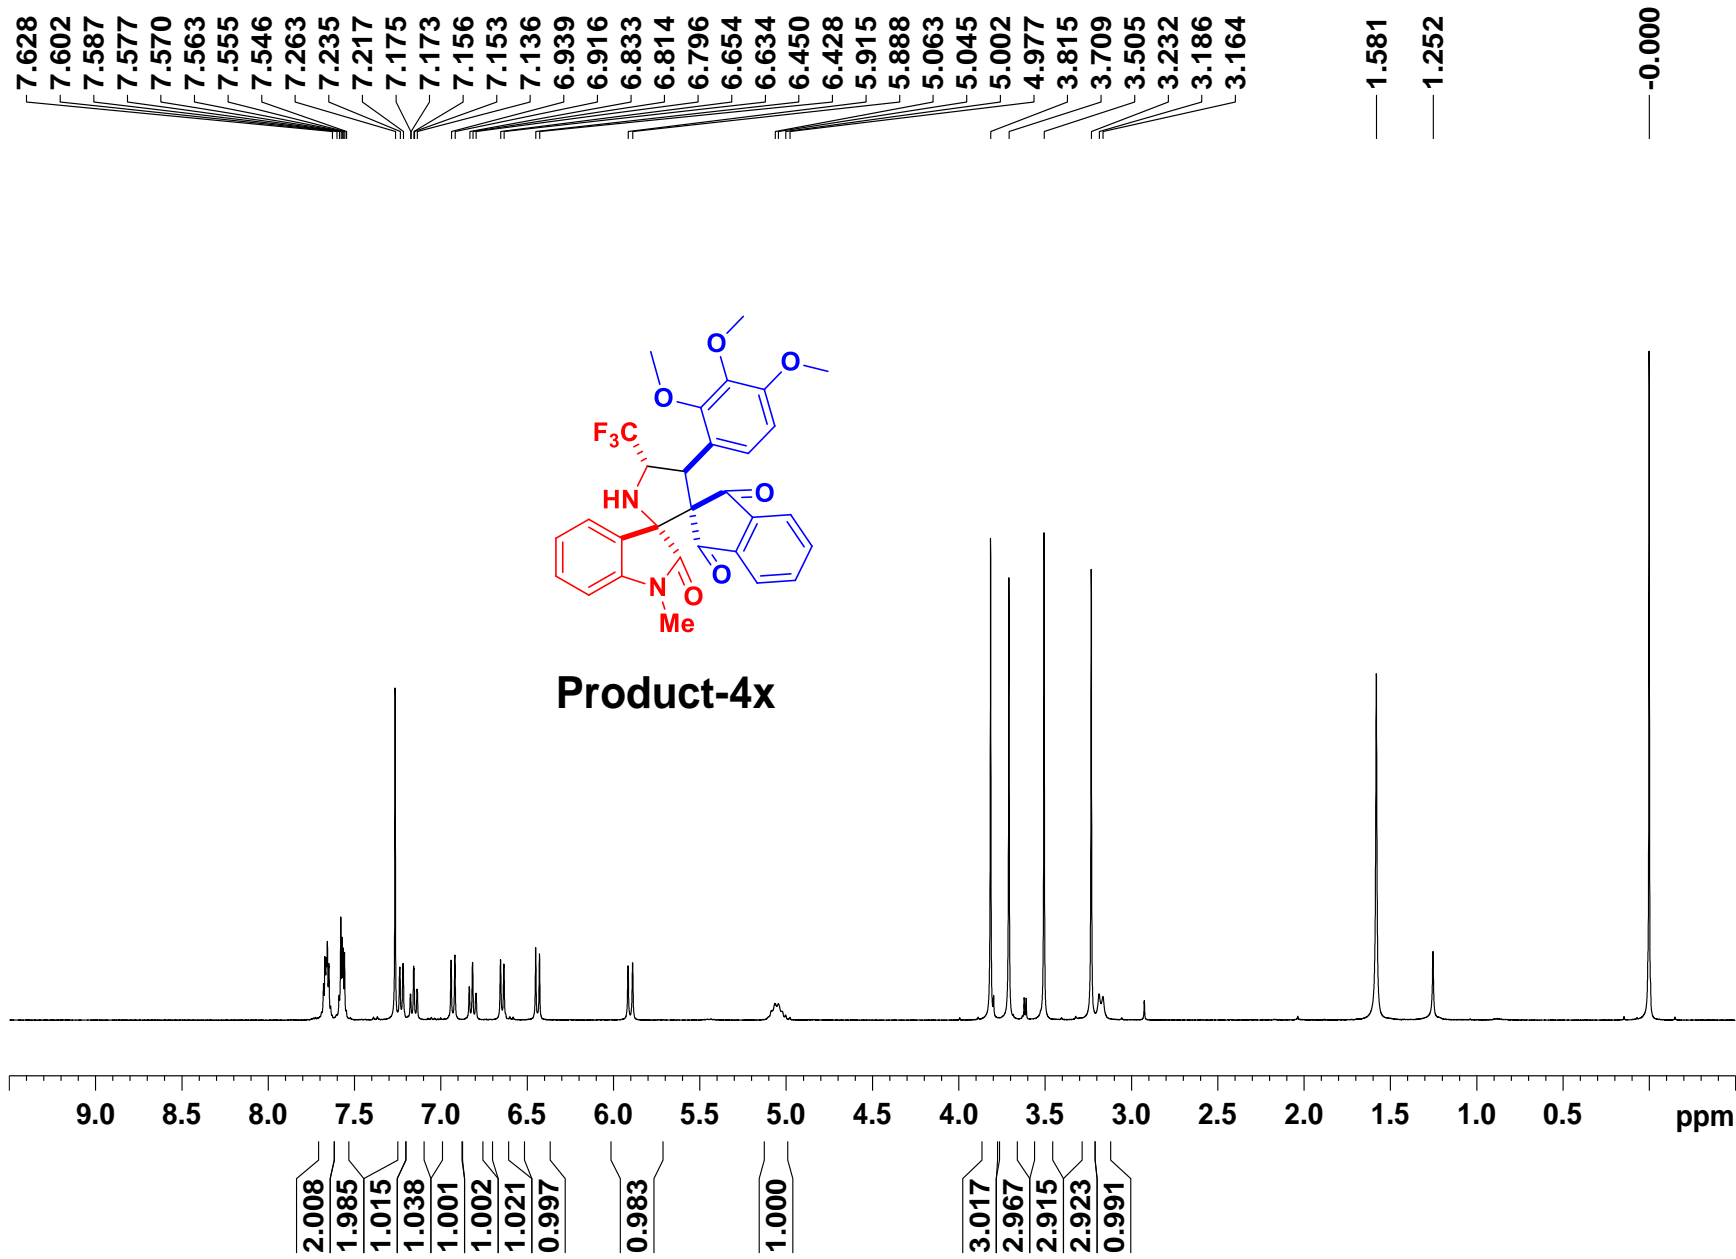



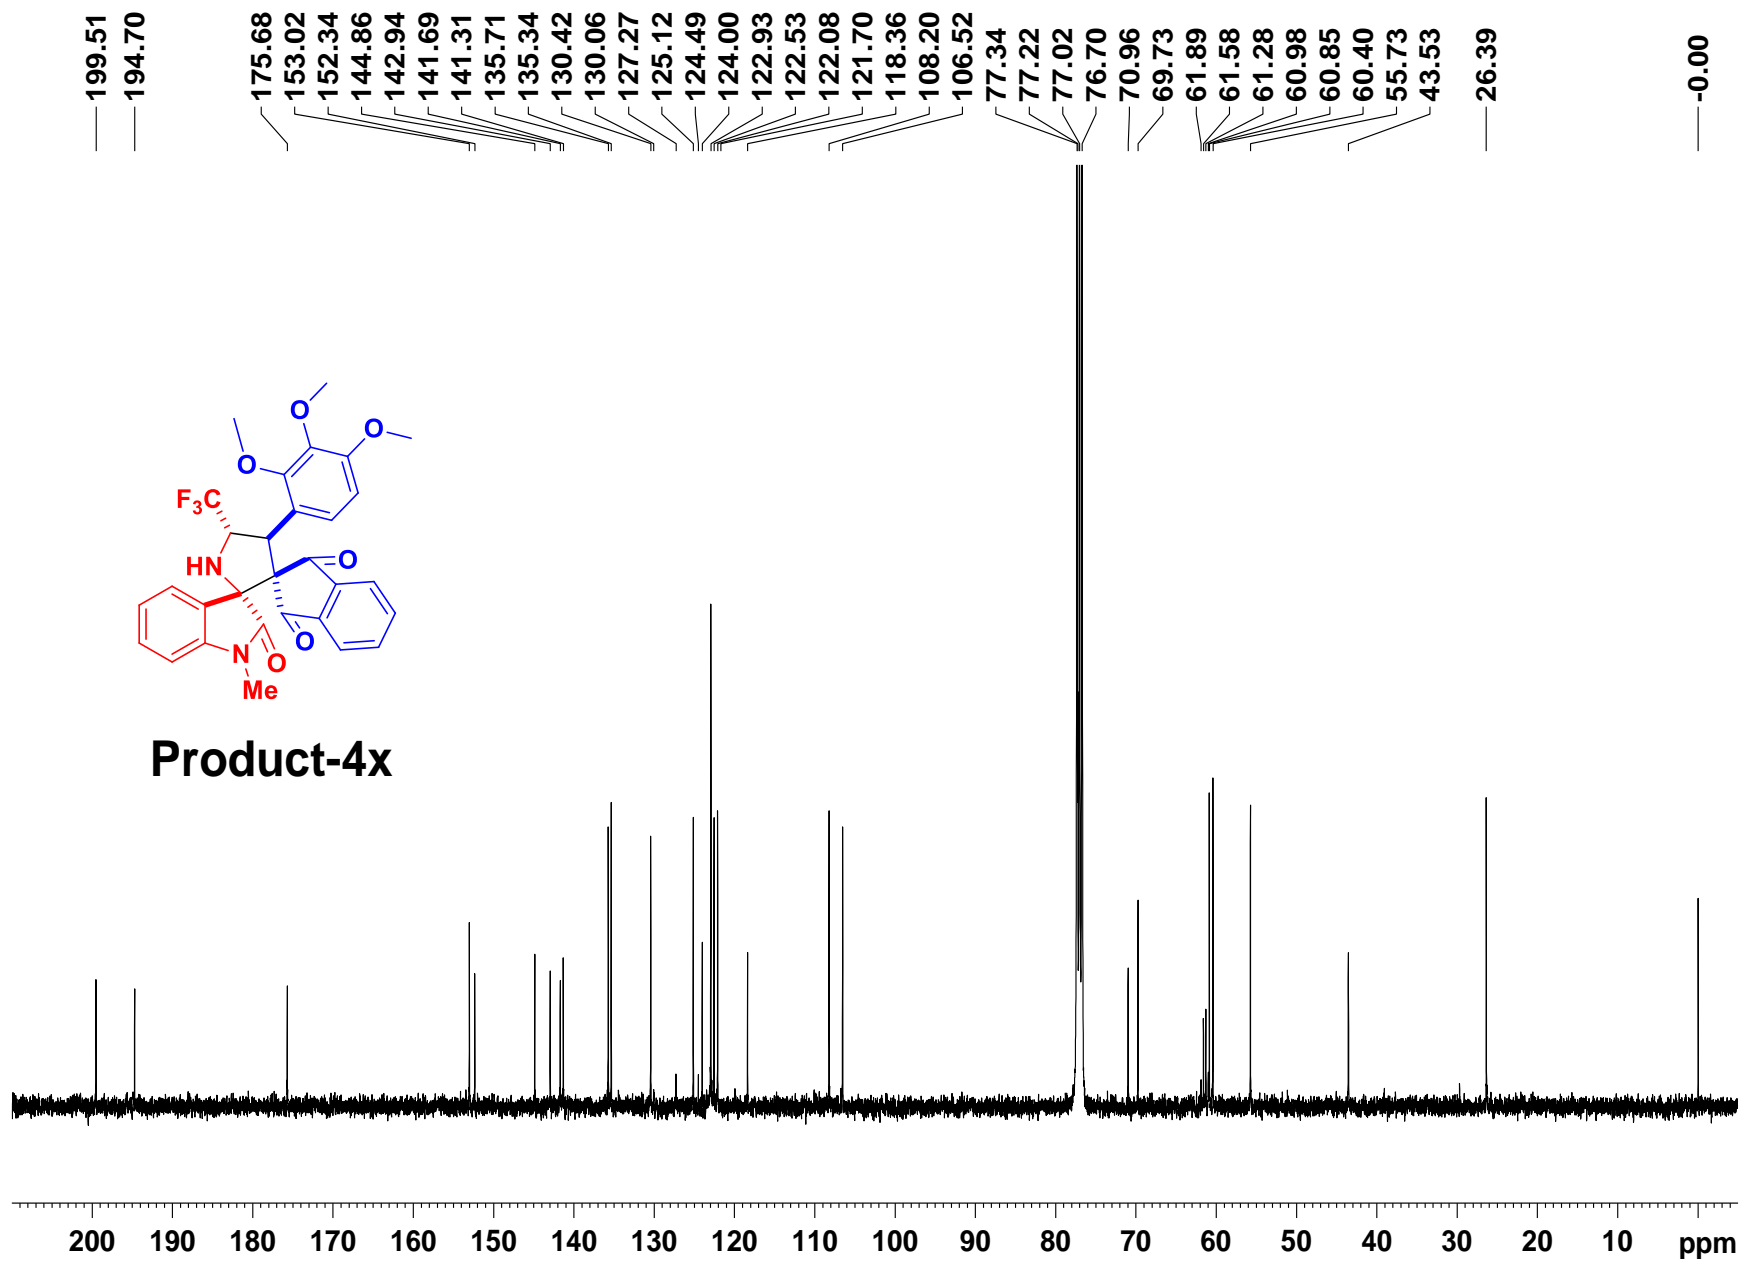

— -72.20

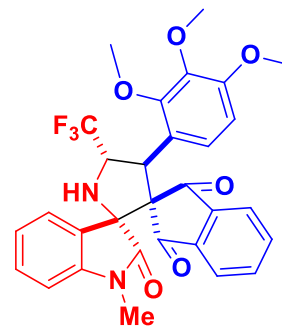

**Product-4x**

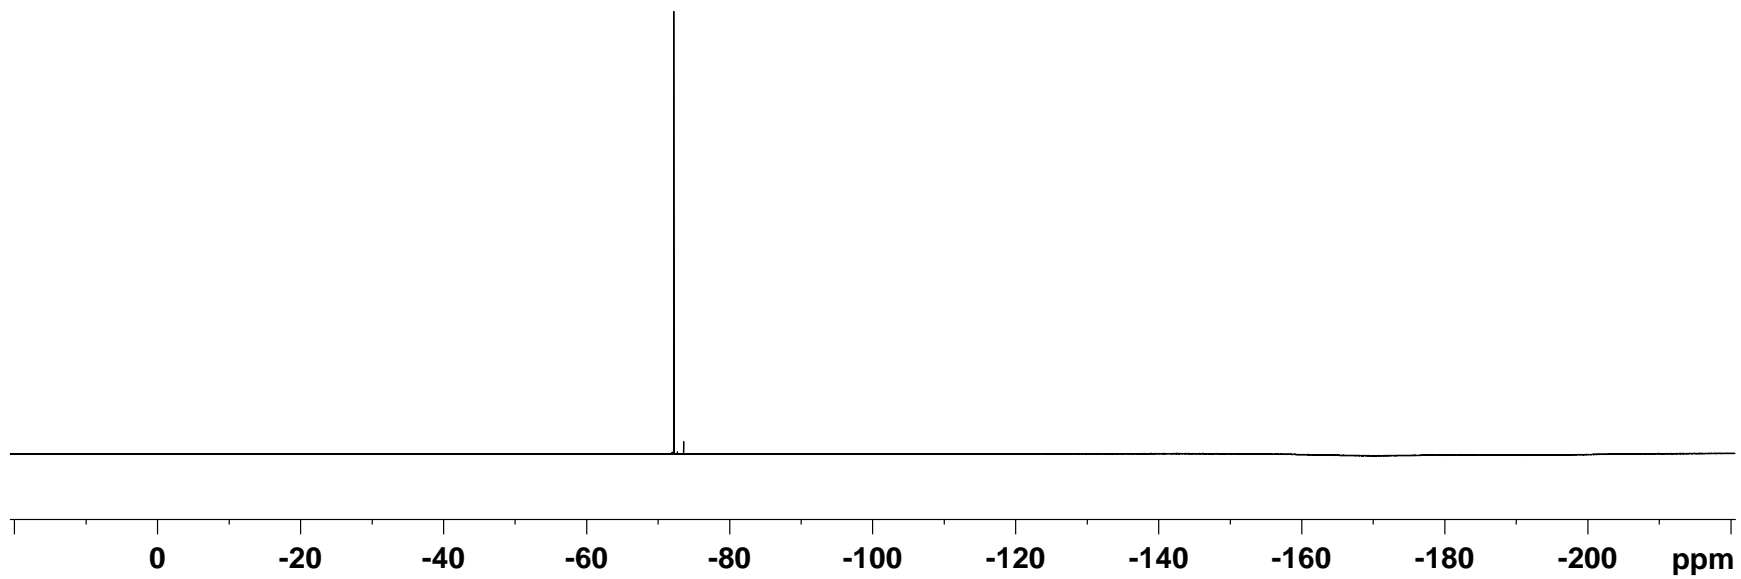

S90

7.815  
7.798  
7.737  
7.721  
7.717  
7.688  
7.673  
7.671  
7.656  
7.642  
7.624  
7.265  
7.190  
7.171  
7.161  
7.142  
7.122  
7.018  
6.839  
6.820  
6.801  
6.626  
6.607  
6.154  
6.146  
6.064  
6.059  
6.052  
5.552  
5.526  
5.114  
5.093  
5.074  
5.056  
3.204  
3.163

— 1.610

— -0.000

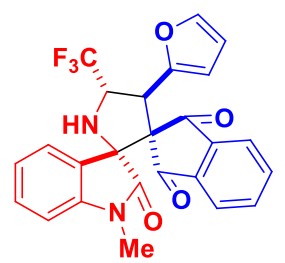

**Product-4y**

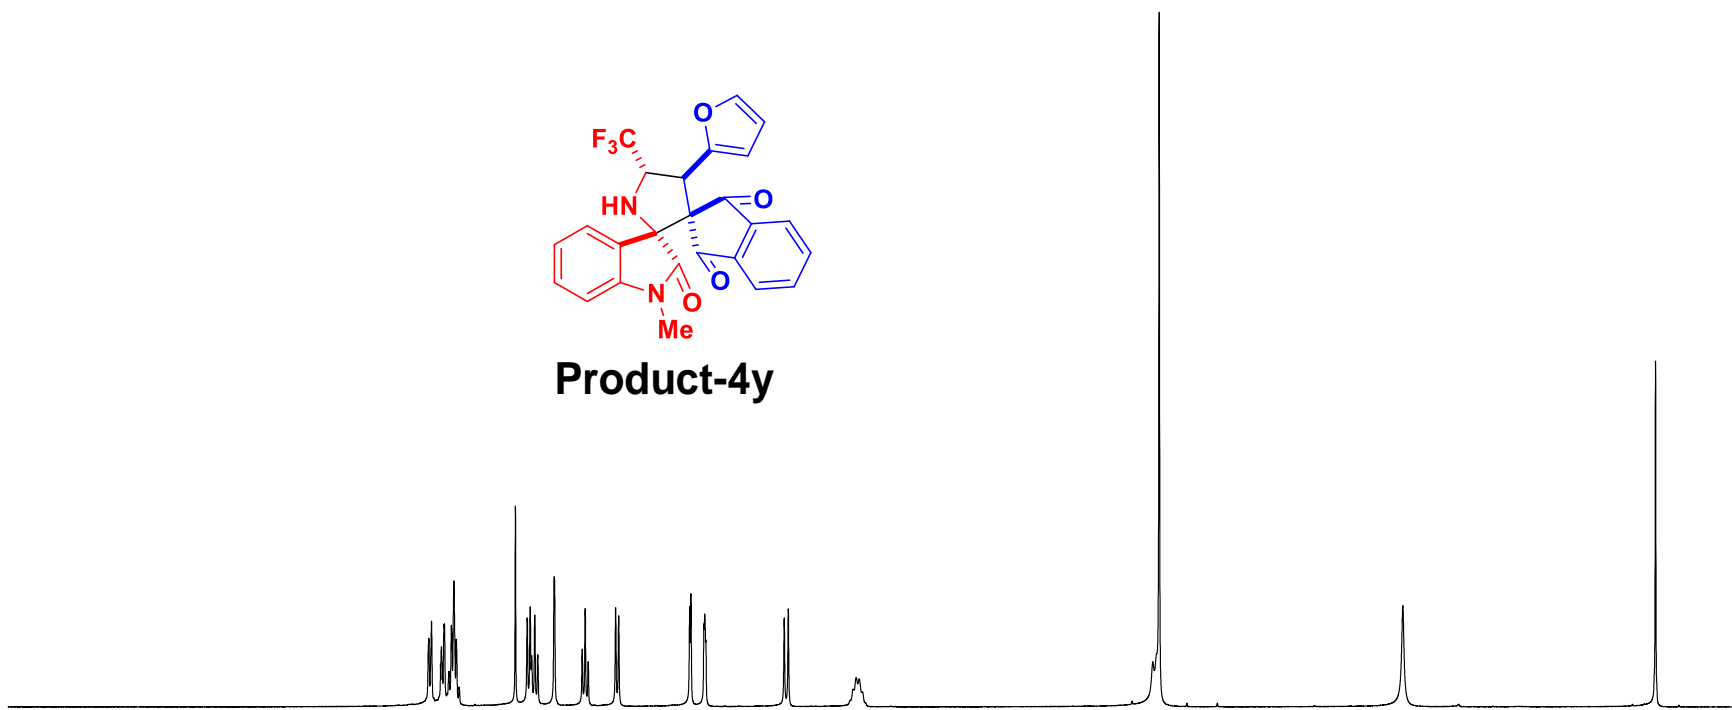

10 9 8 7 6 5 4 3 2 1 ppm

1.123  
1.023  
2.018  
2.097  
1.028  
1.083  
1.028  
1.012  
0.954  
1.000  
1.030  
4.126

198.11  
194.85

175.17

147.15

144.40

142.44

142.22

141.39

135.88

130.67

129.67

126.88

124.82

124.10

123.24

123.12

122.97

122.31

121.32

110.24

109.27

108.35

77.34

77.02

76.70

70.14

69.09

61.62

61.30

60.99

60.68

43.83

26.37

-0.00

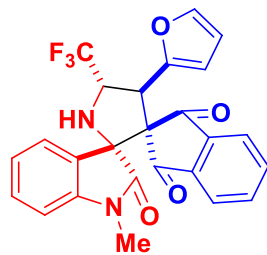

**Product-4y**

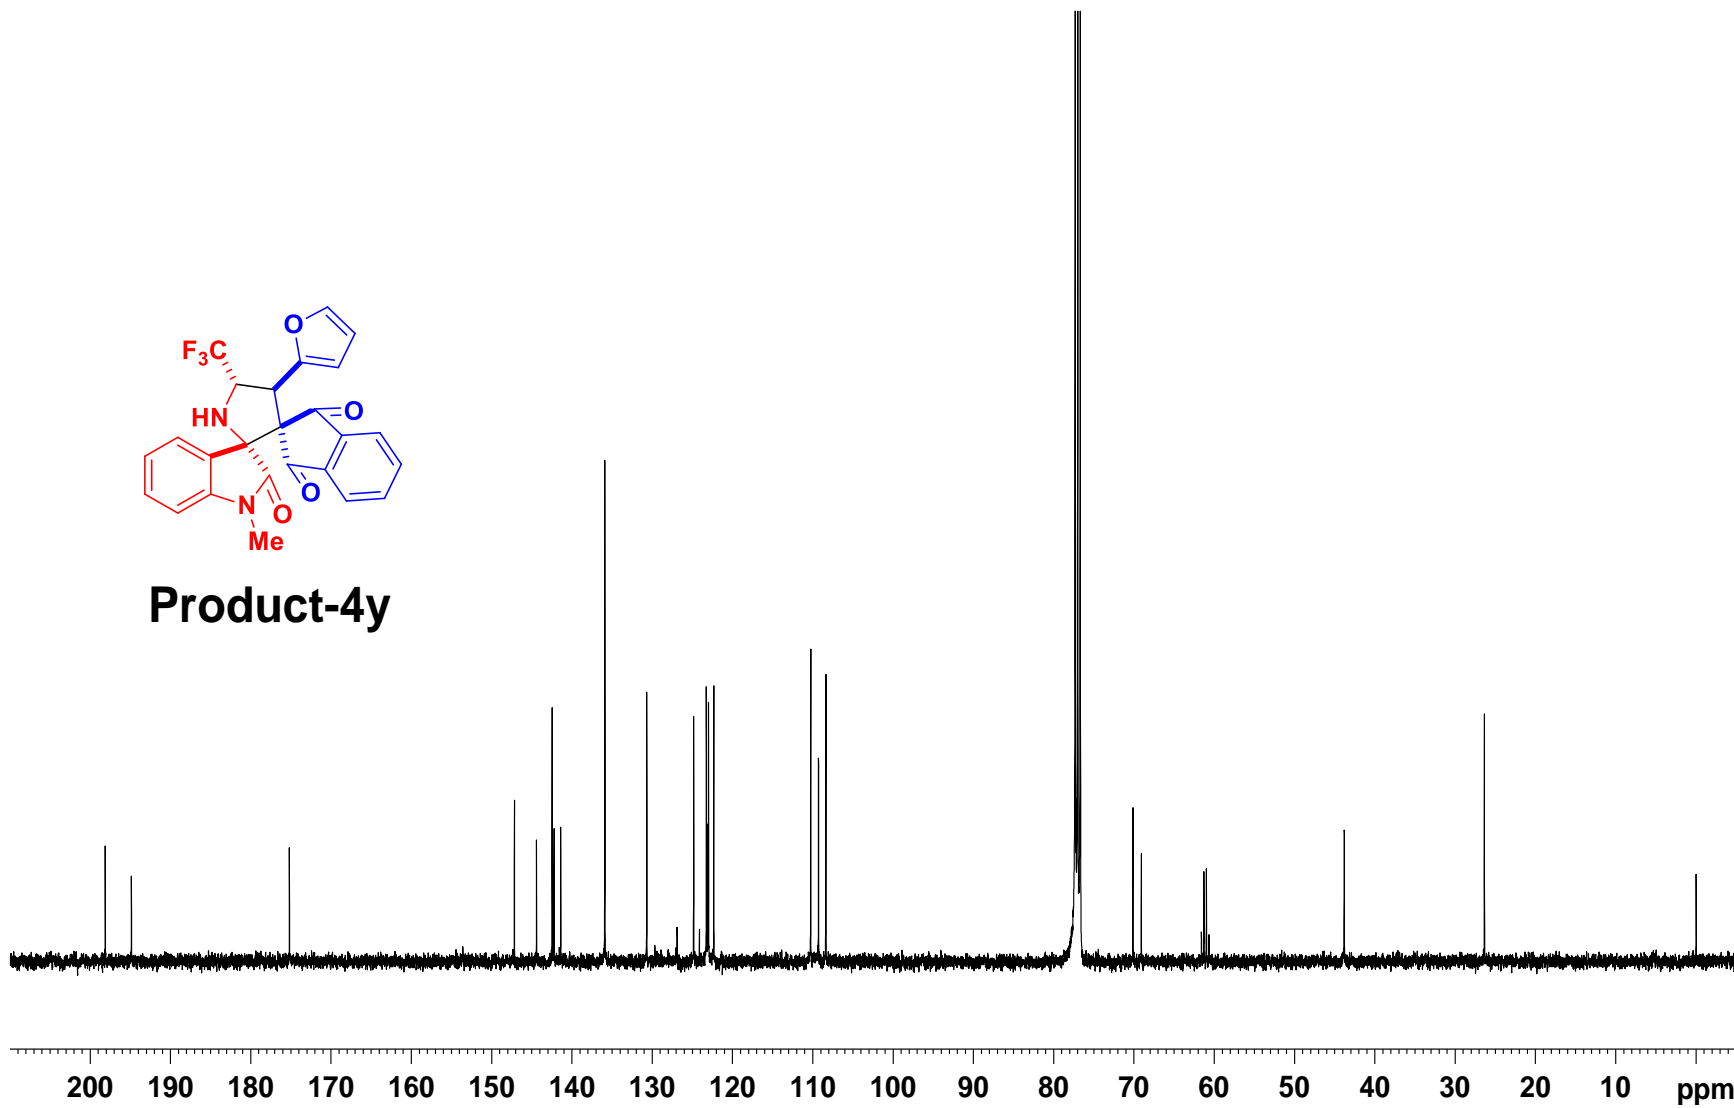

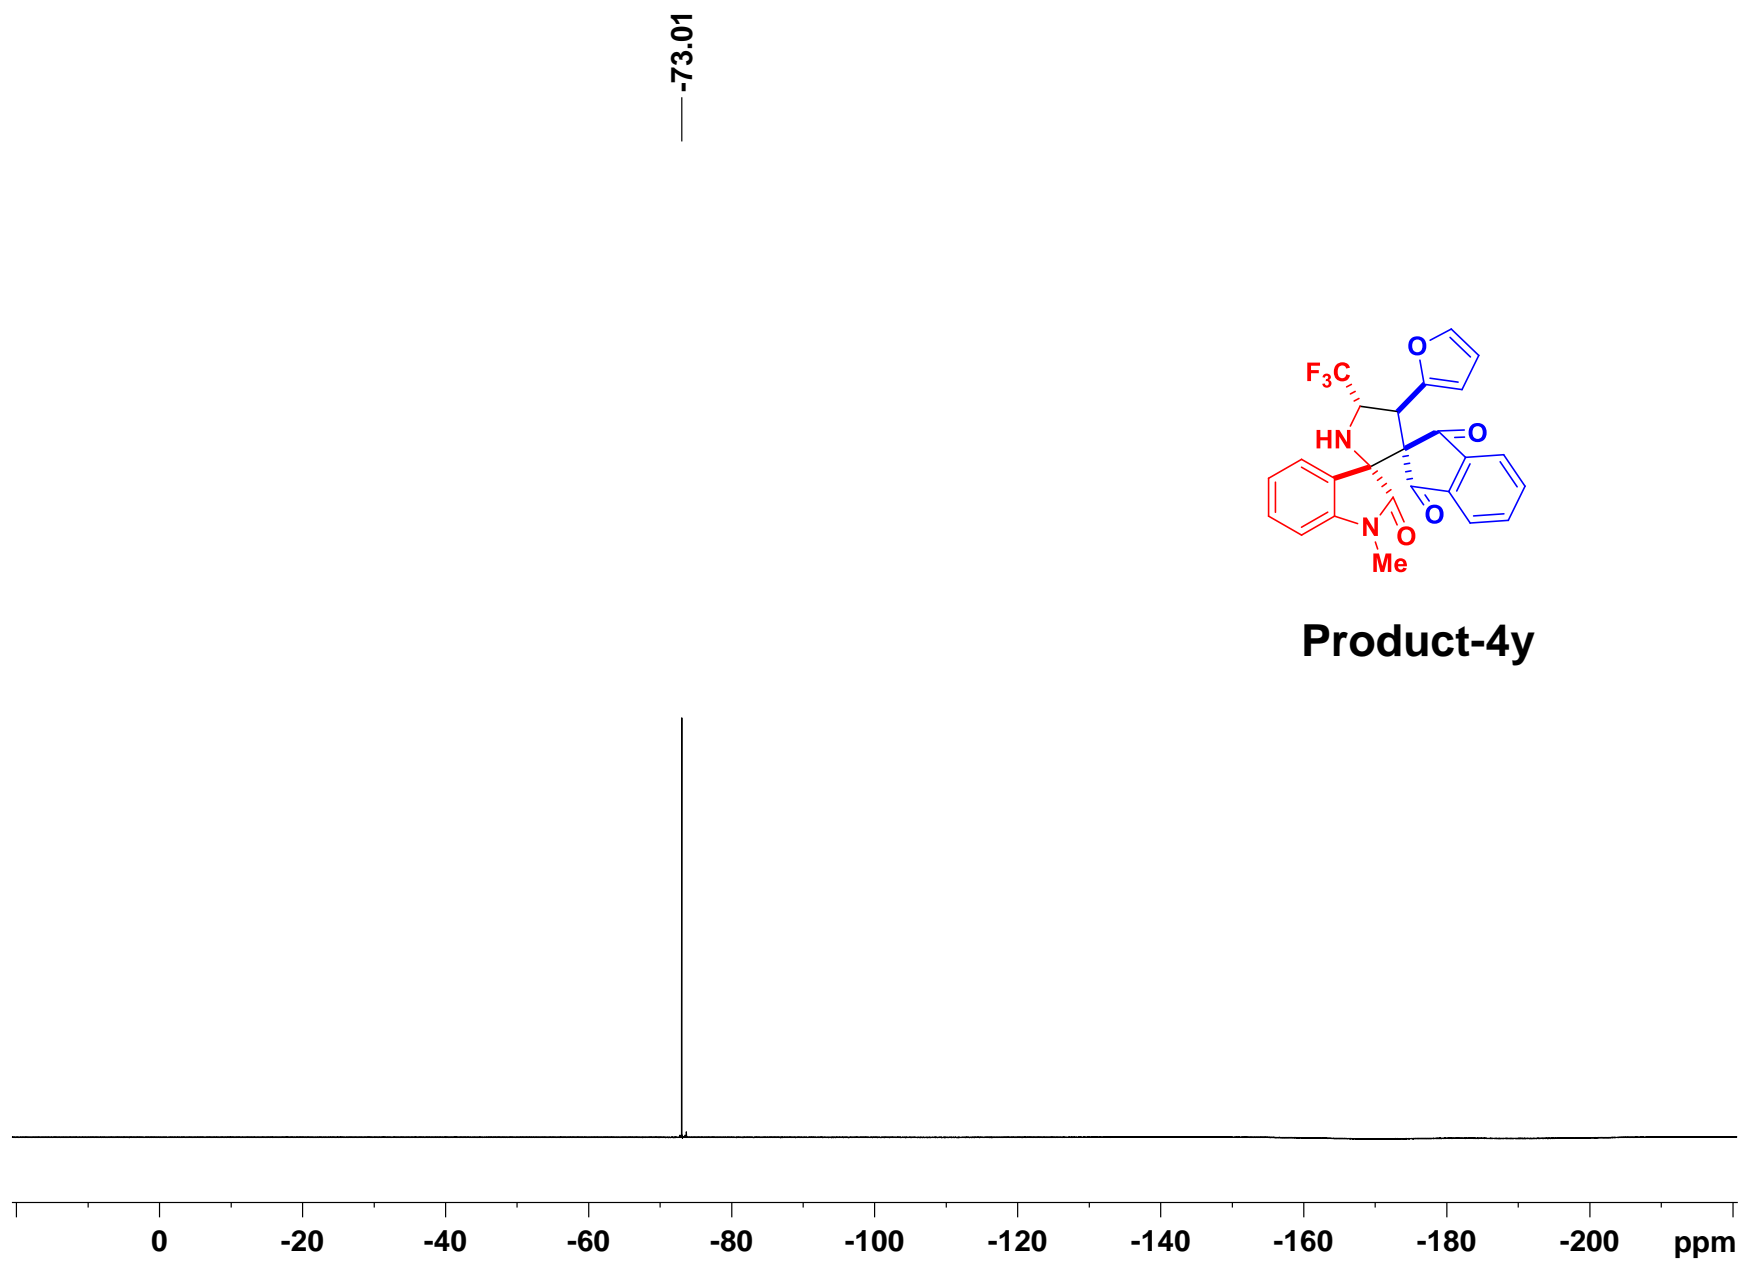

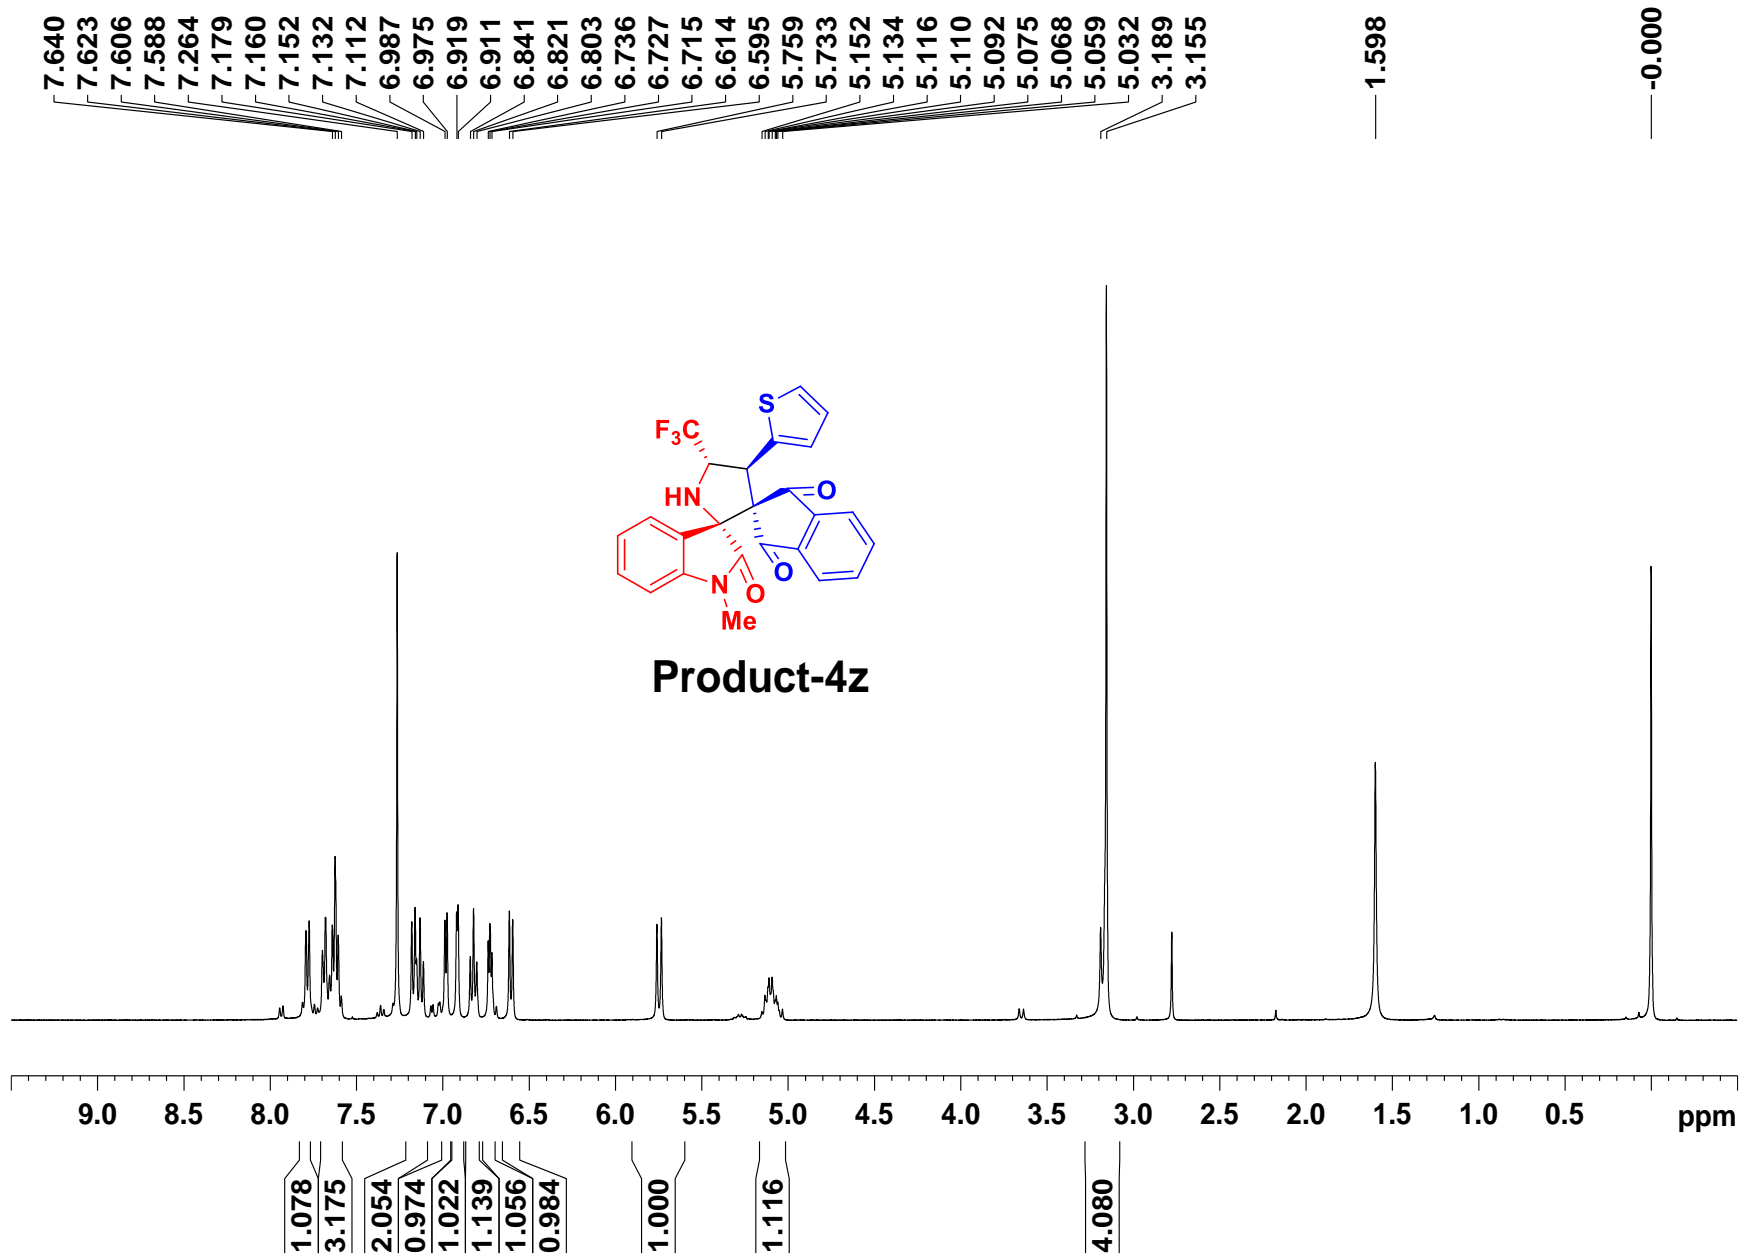

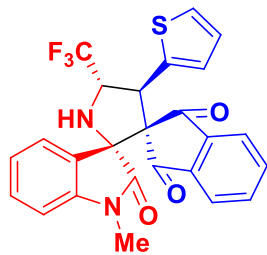

**Product-4z**

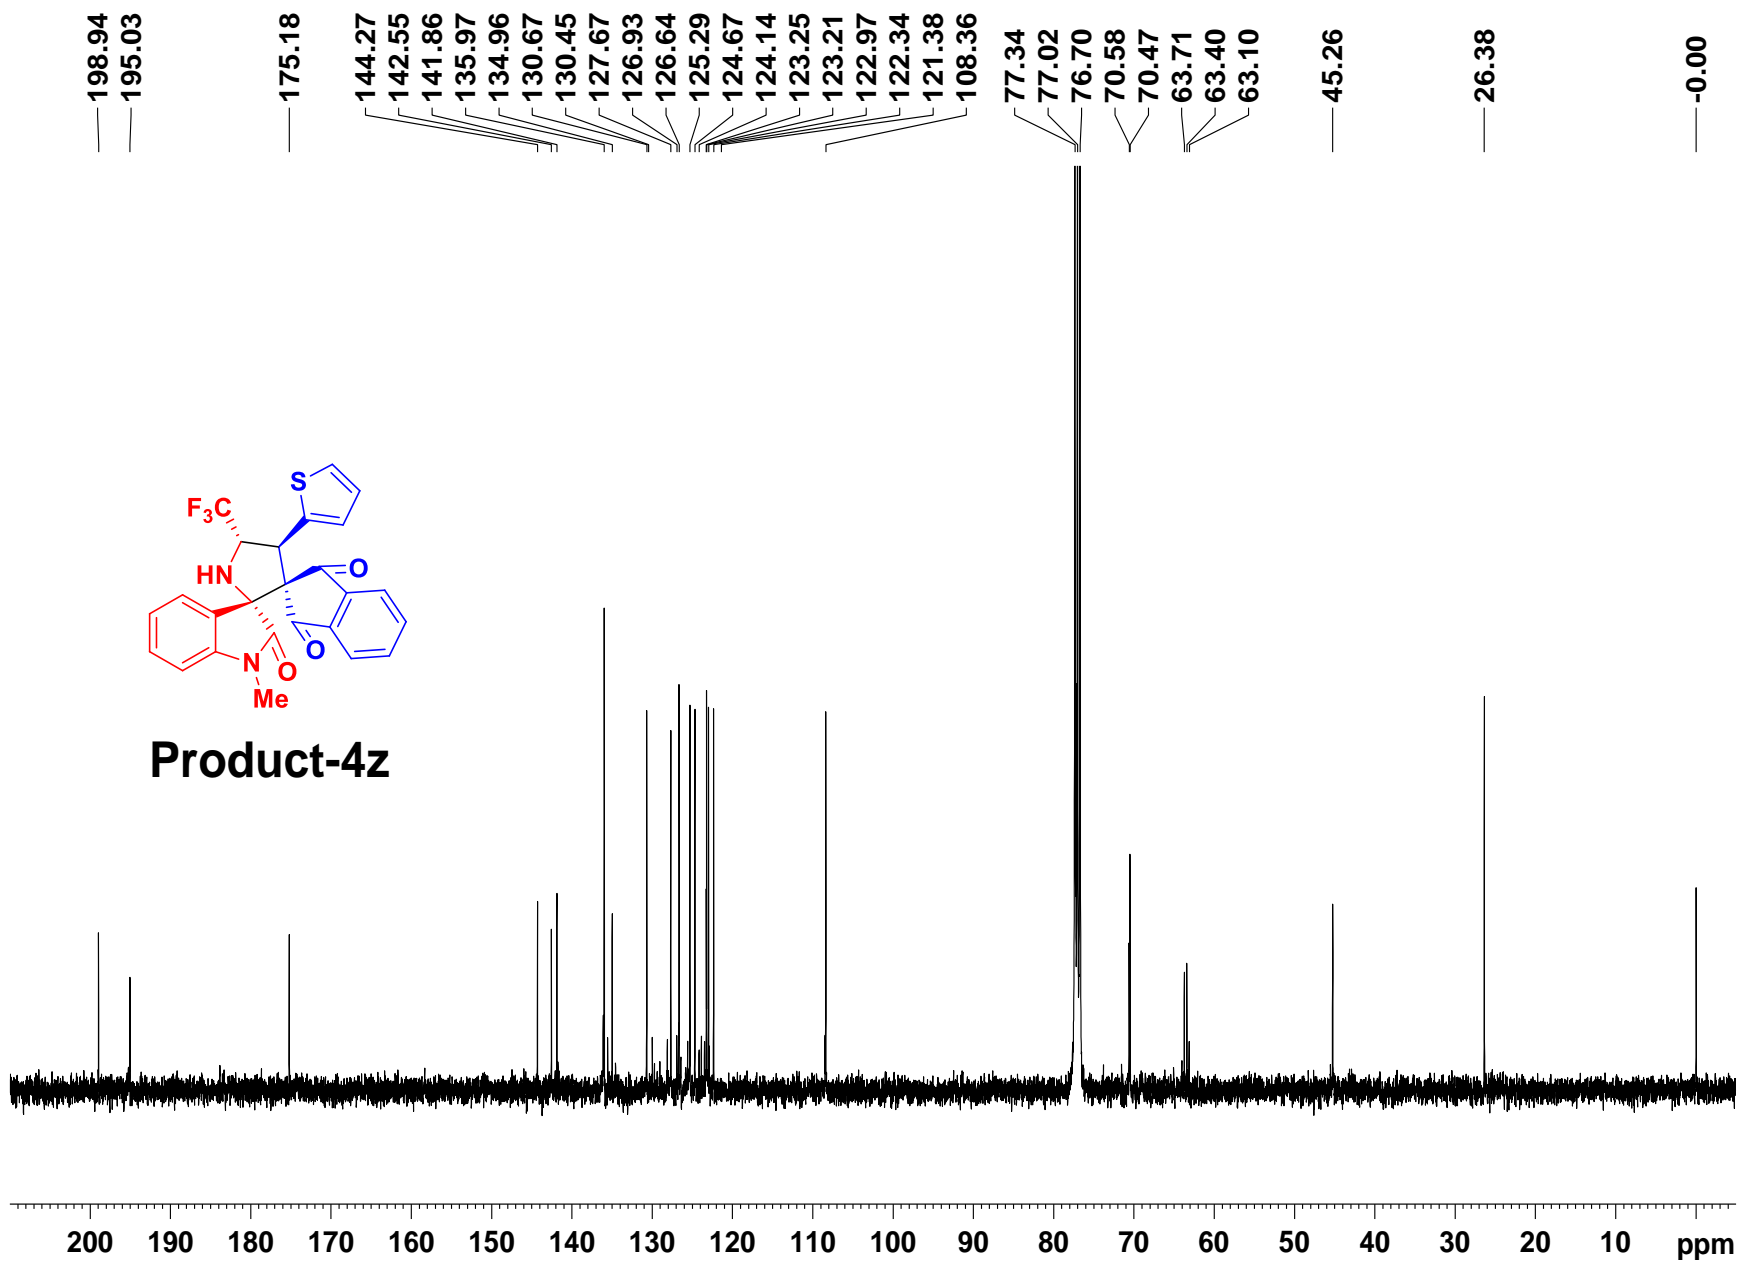

4z.2.fid  
Product-4z

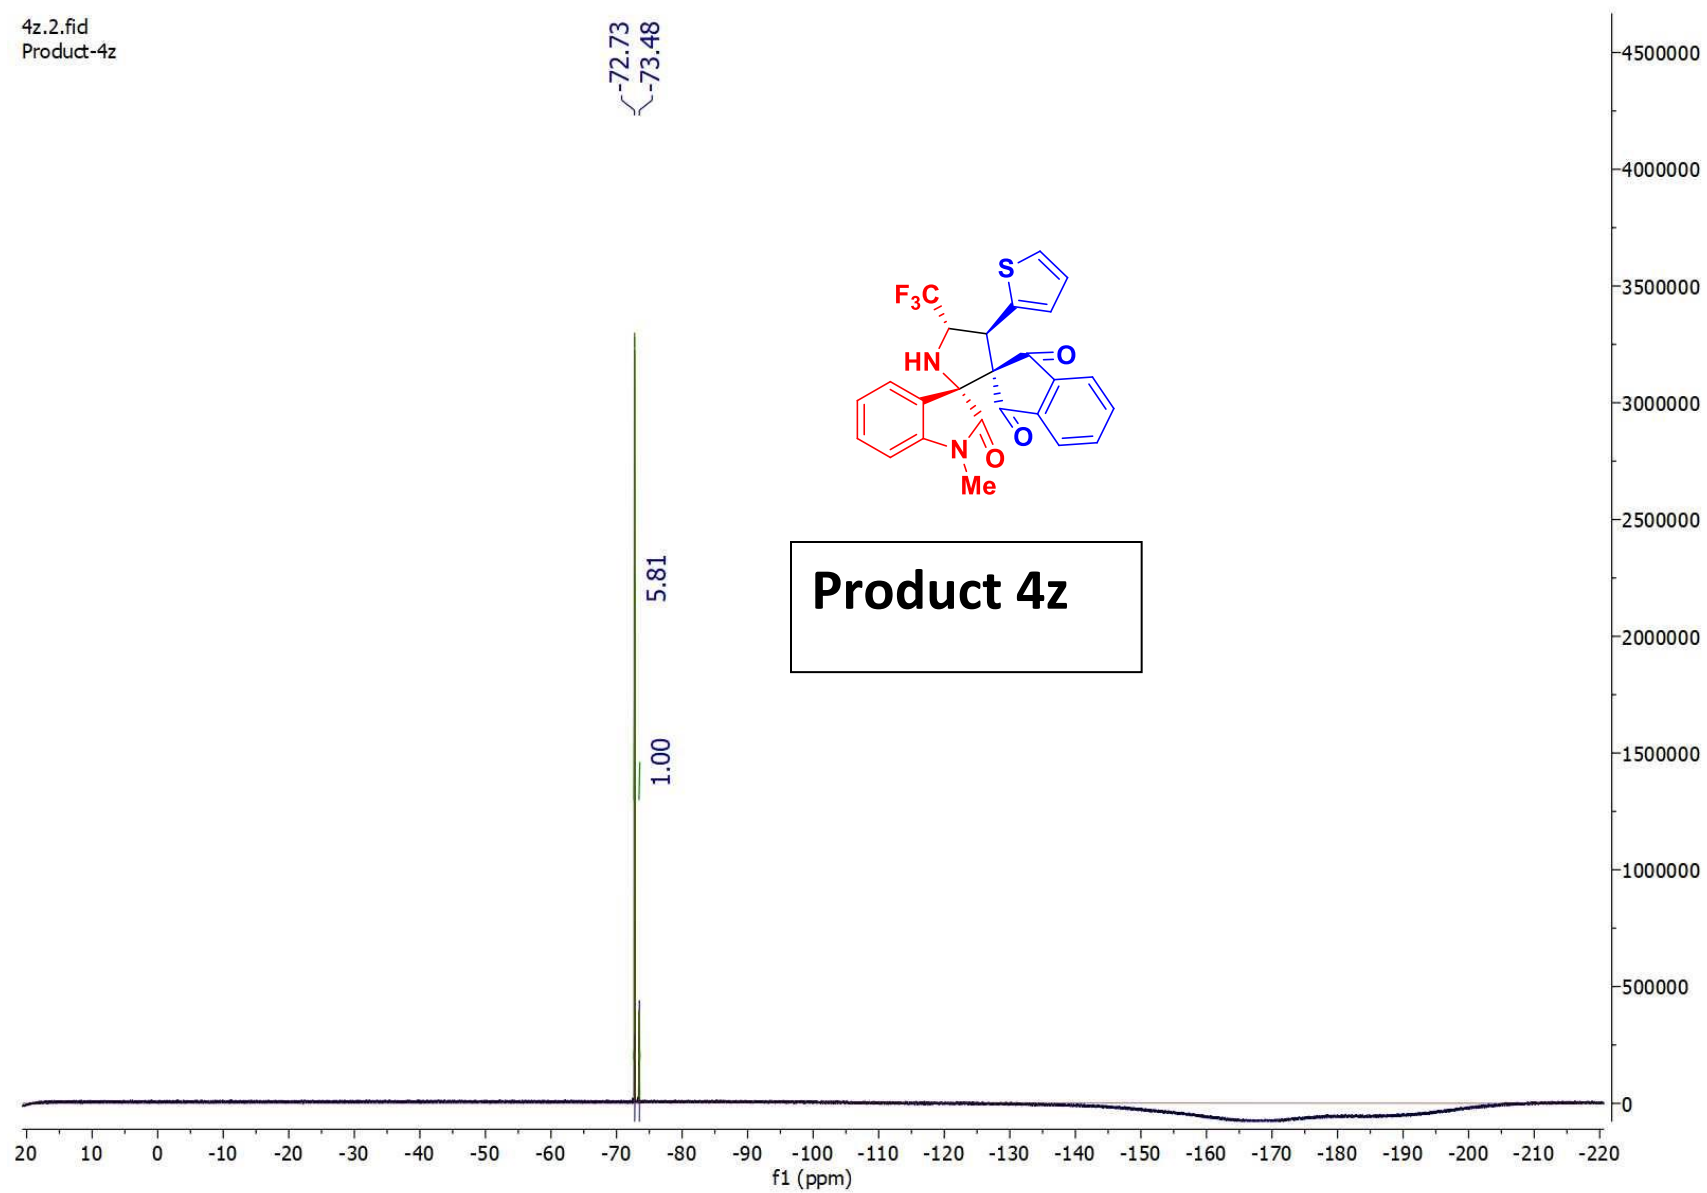



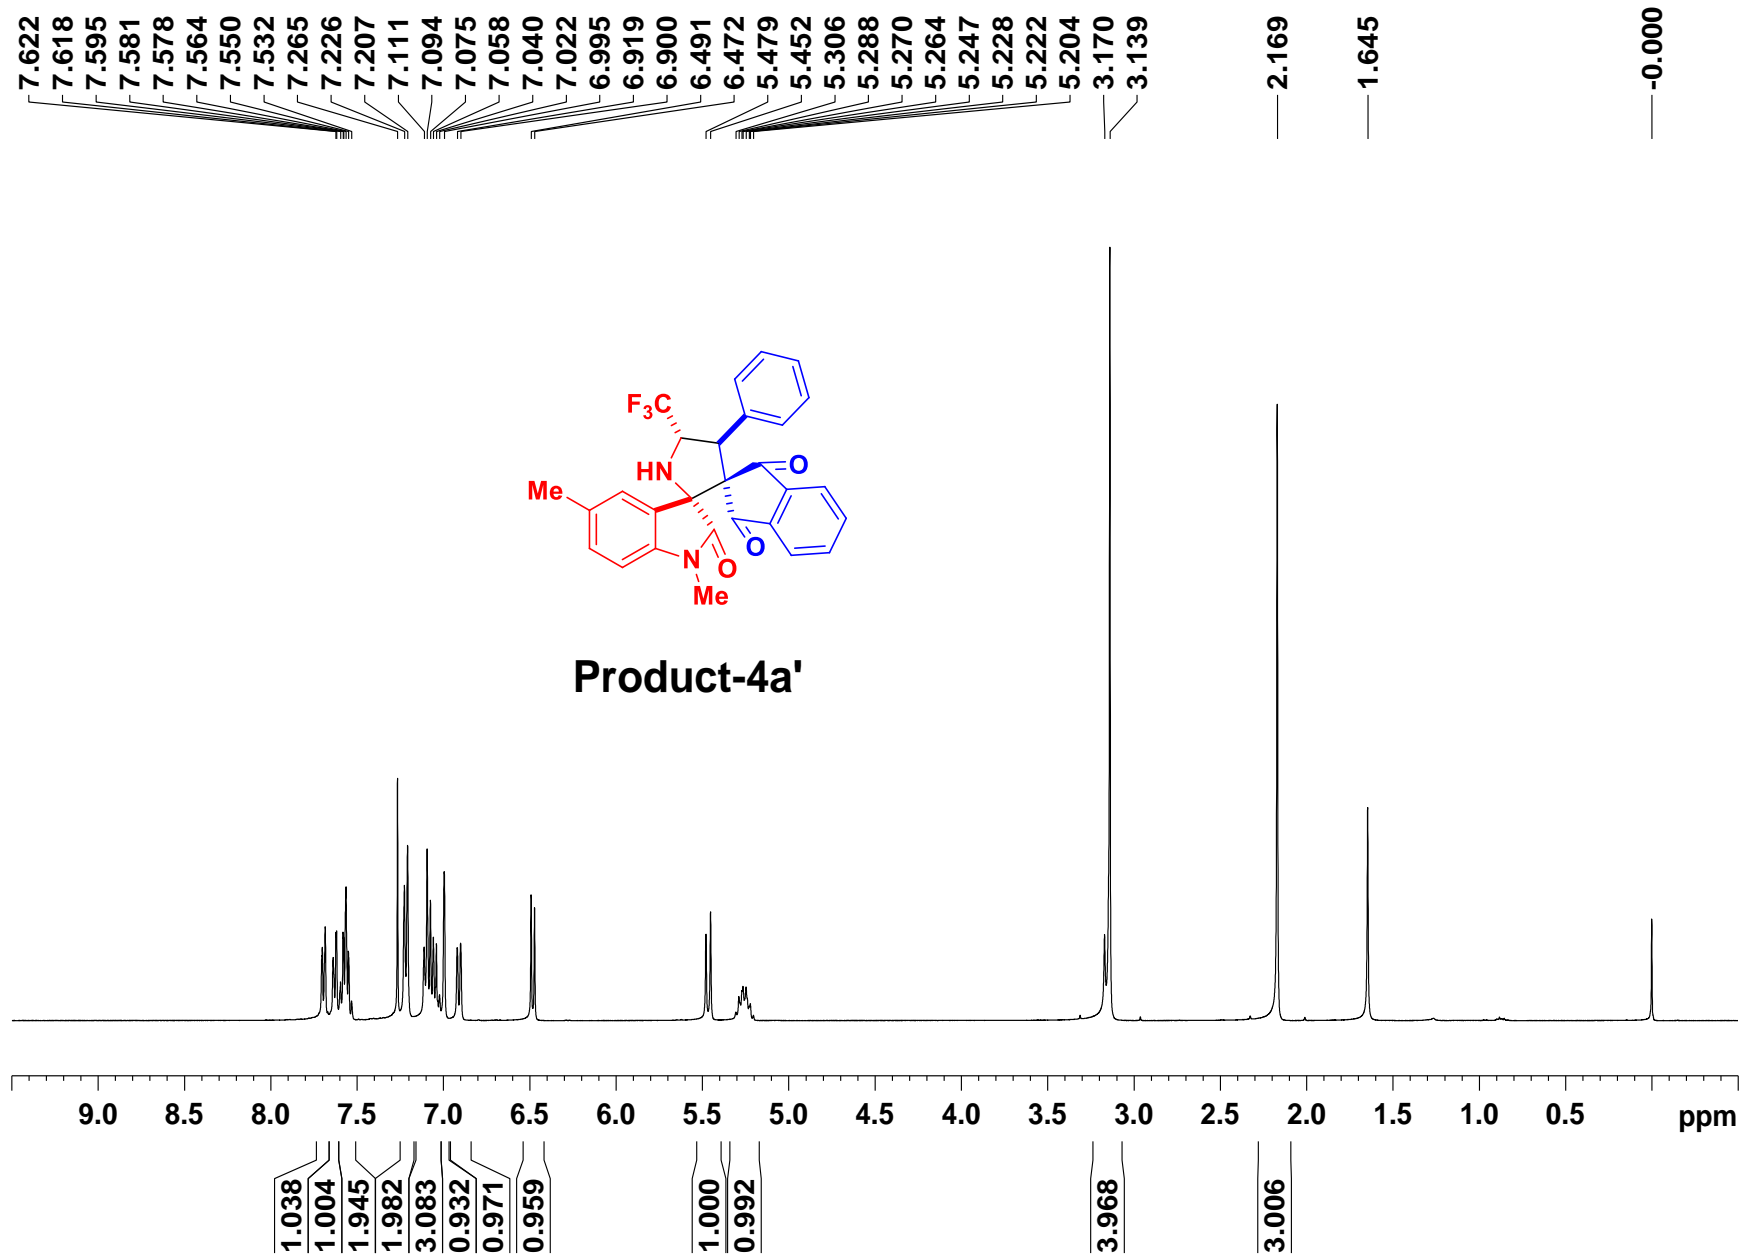

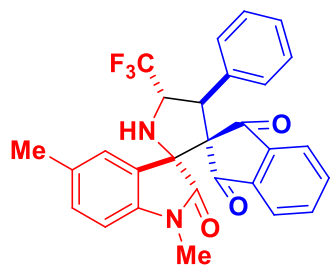

**Product-4a'**

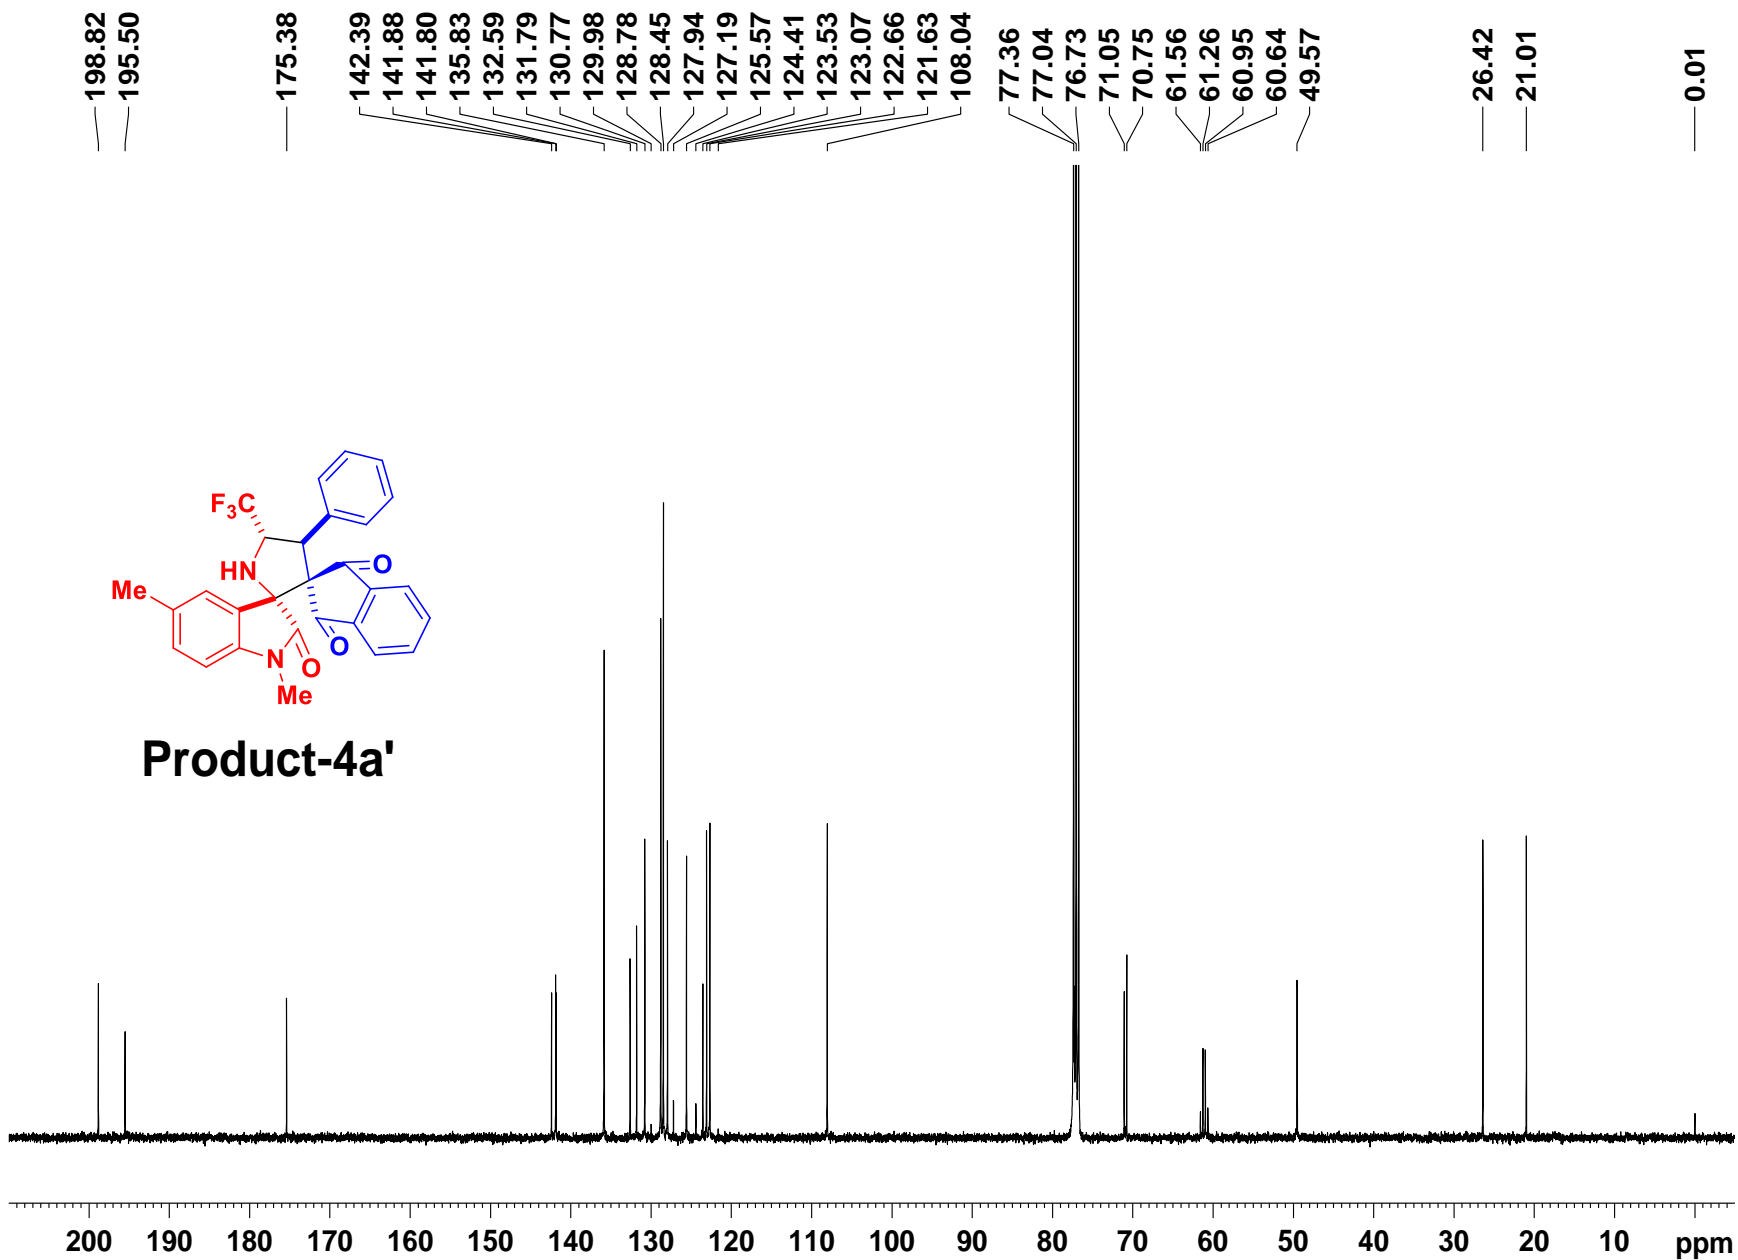

—72.73

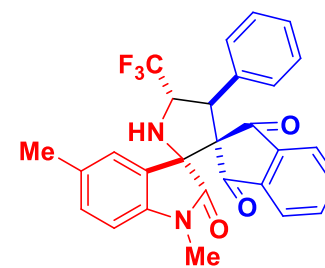

**Product-4a'**

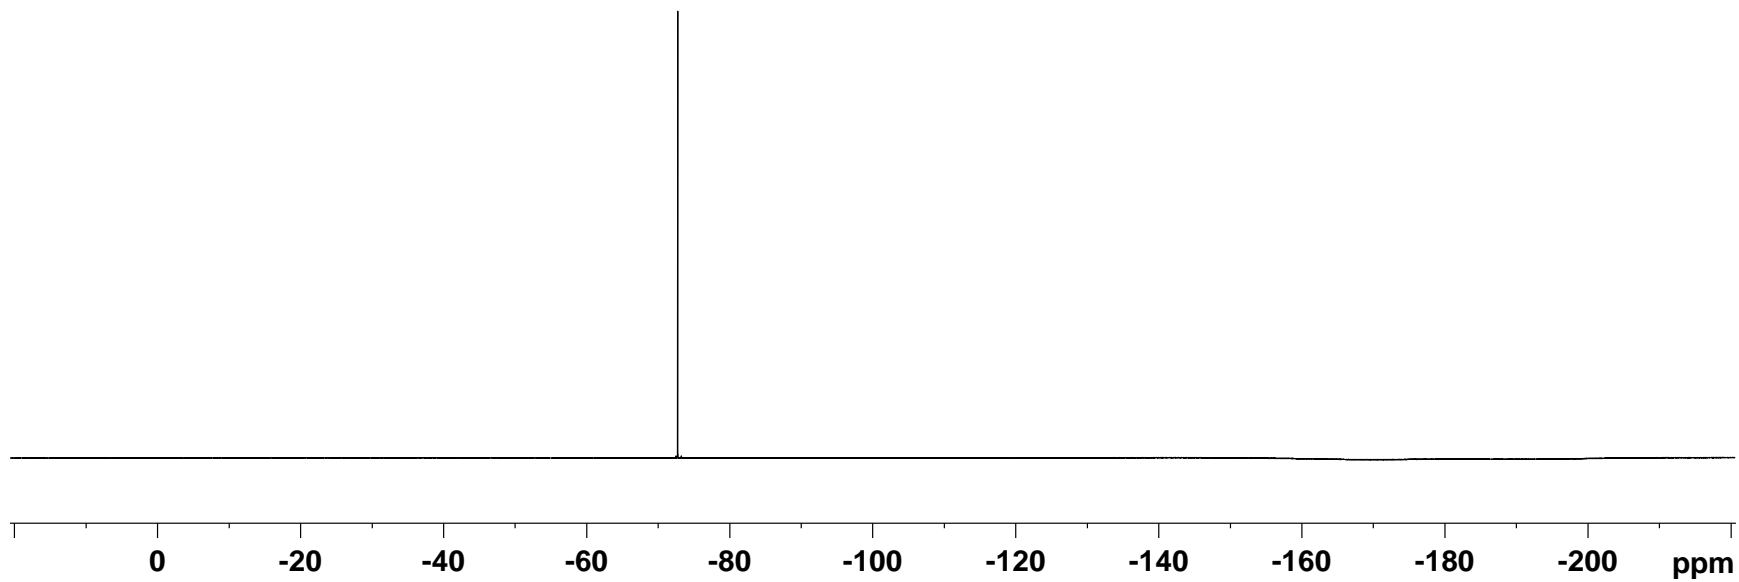

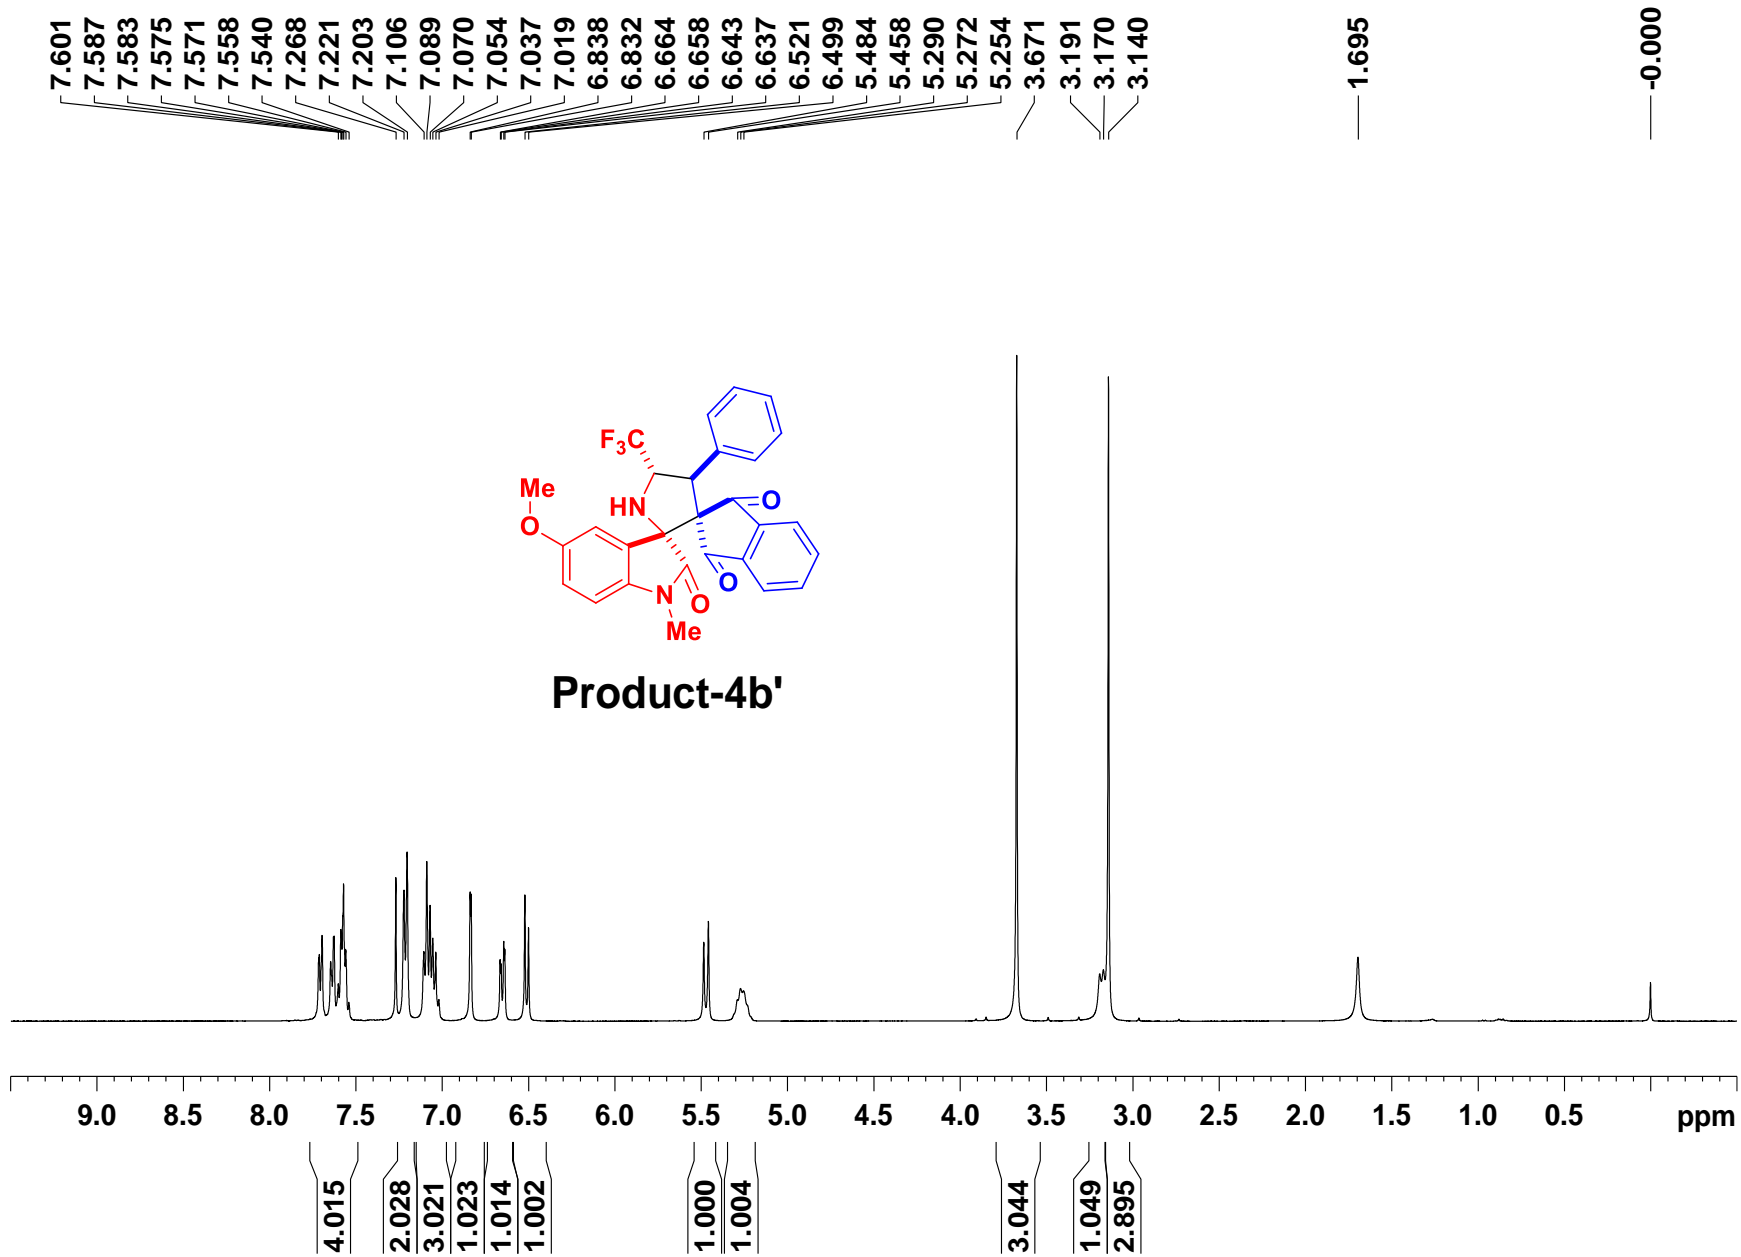

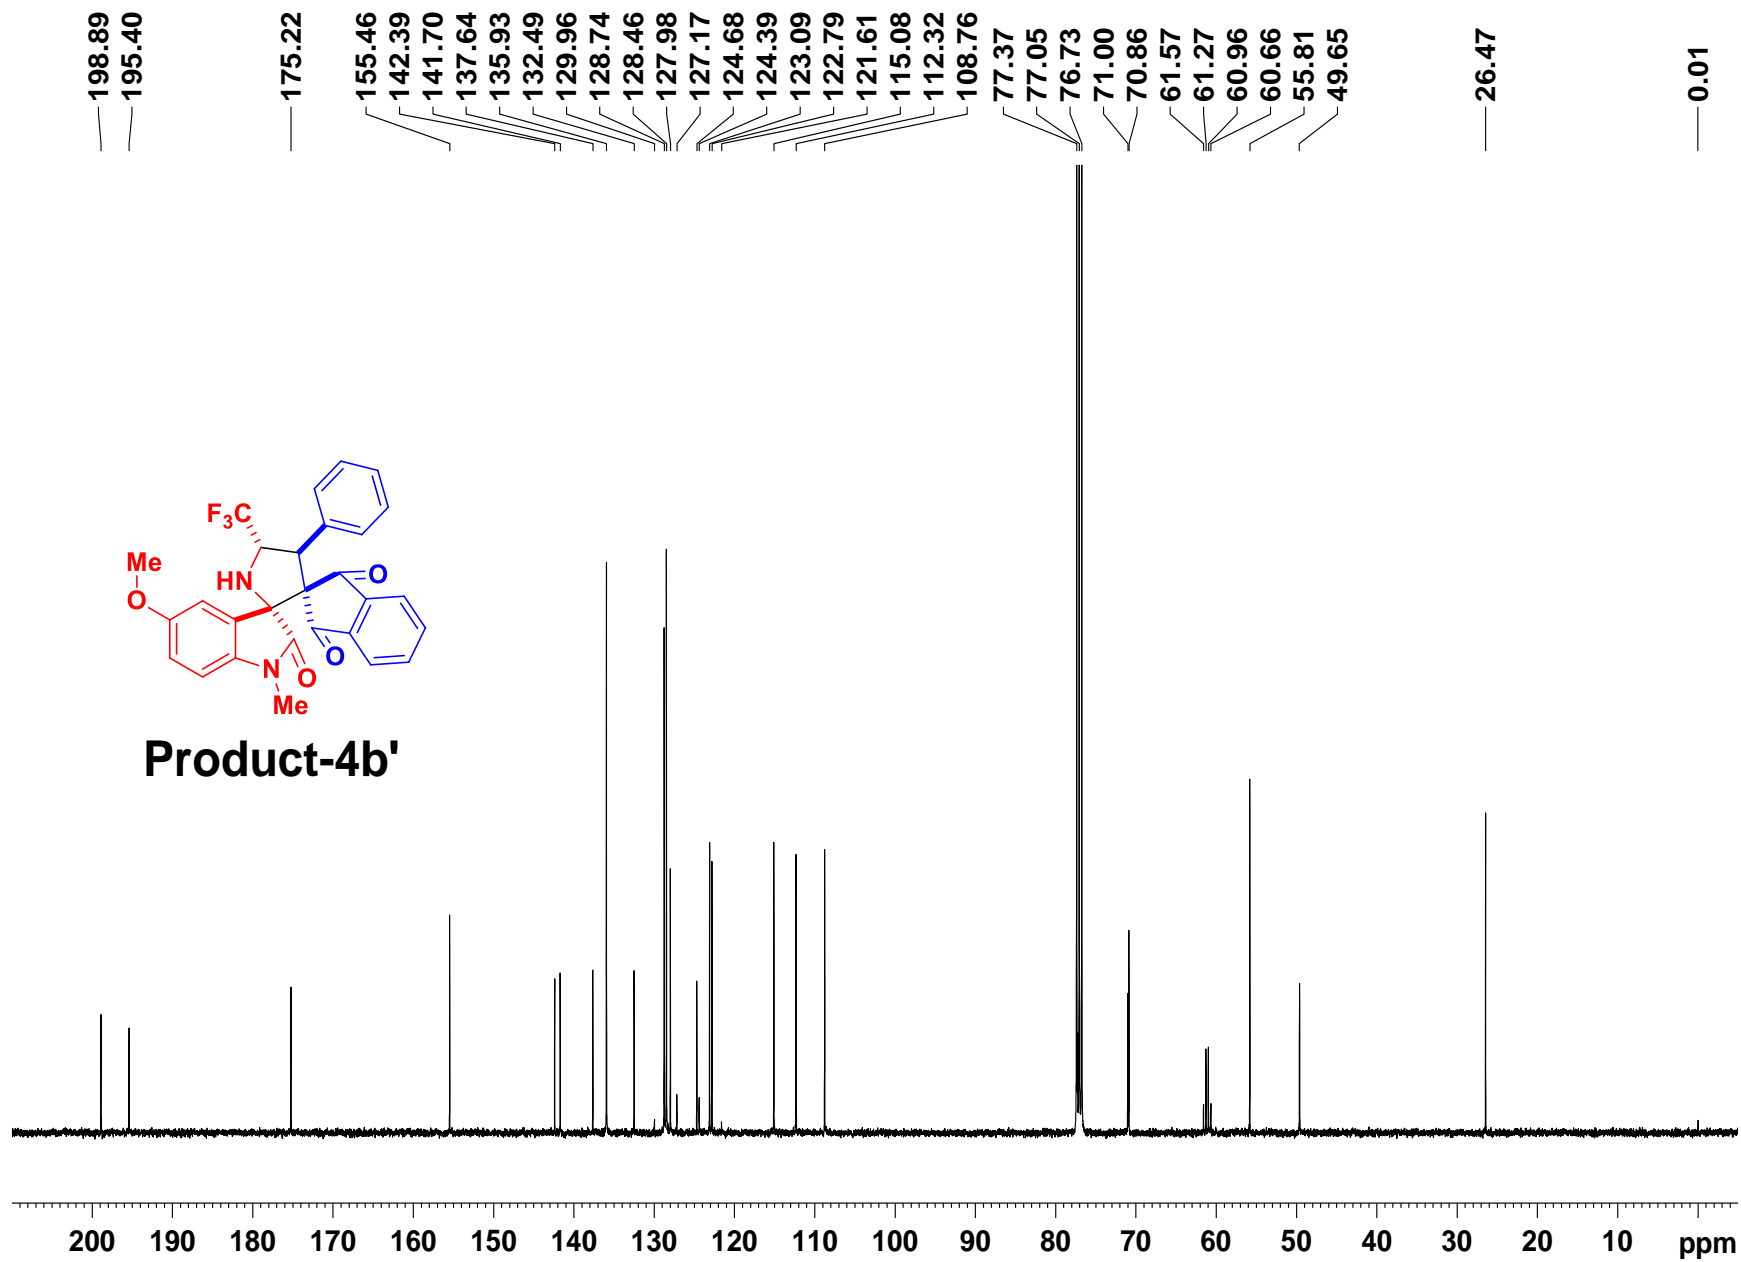

S101

—72.71

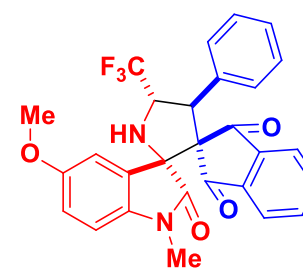

**Product-4b'**

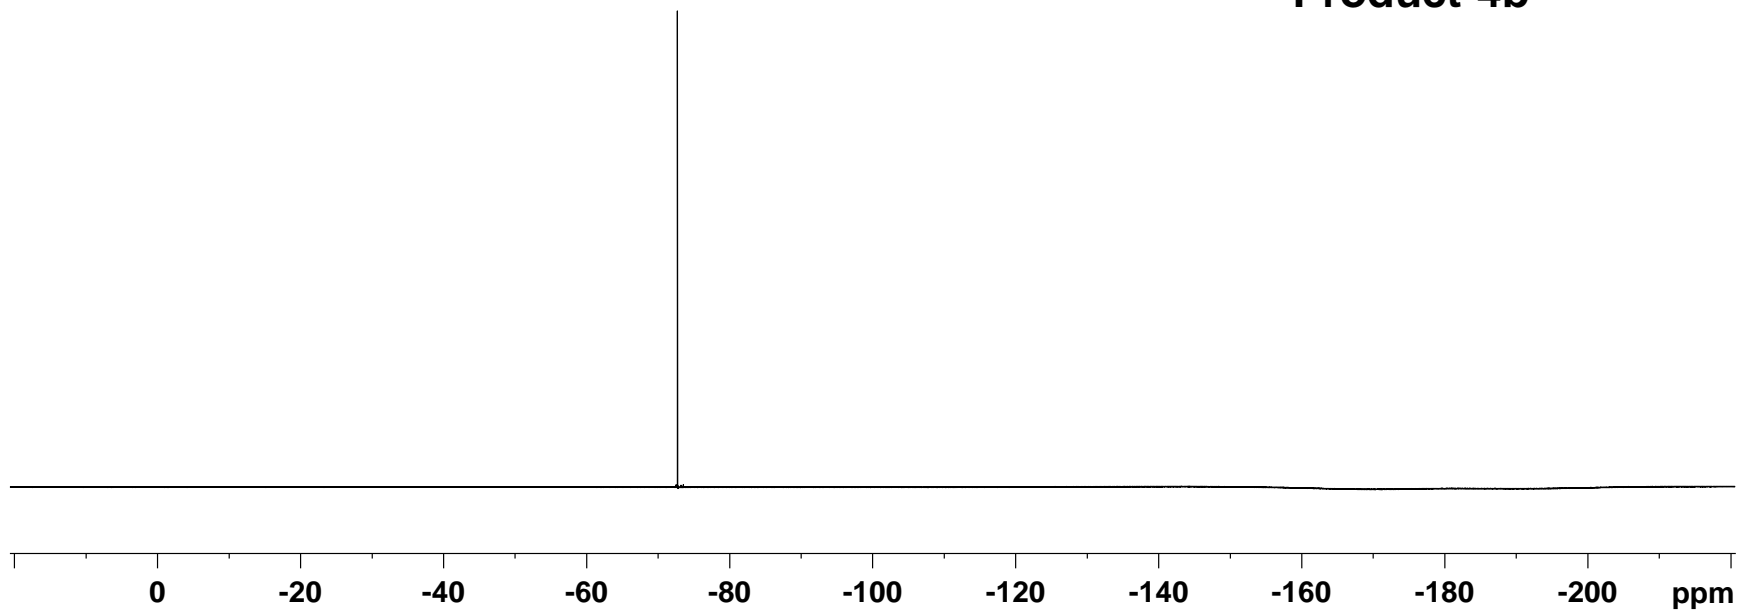

S102

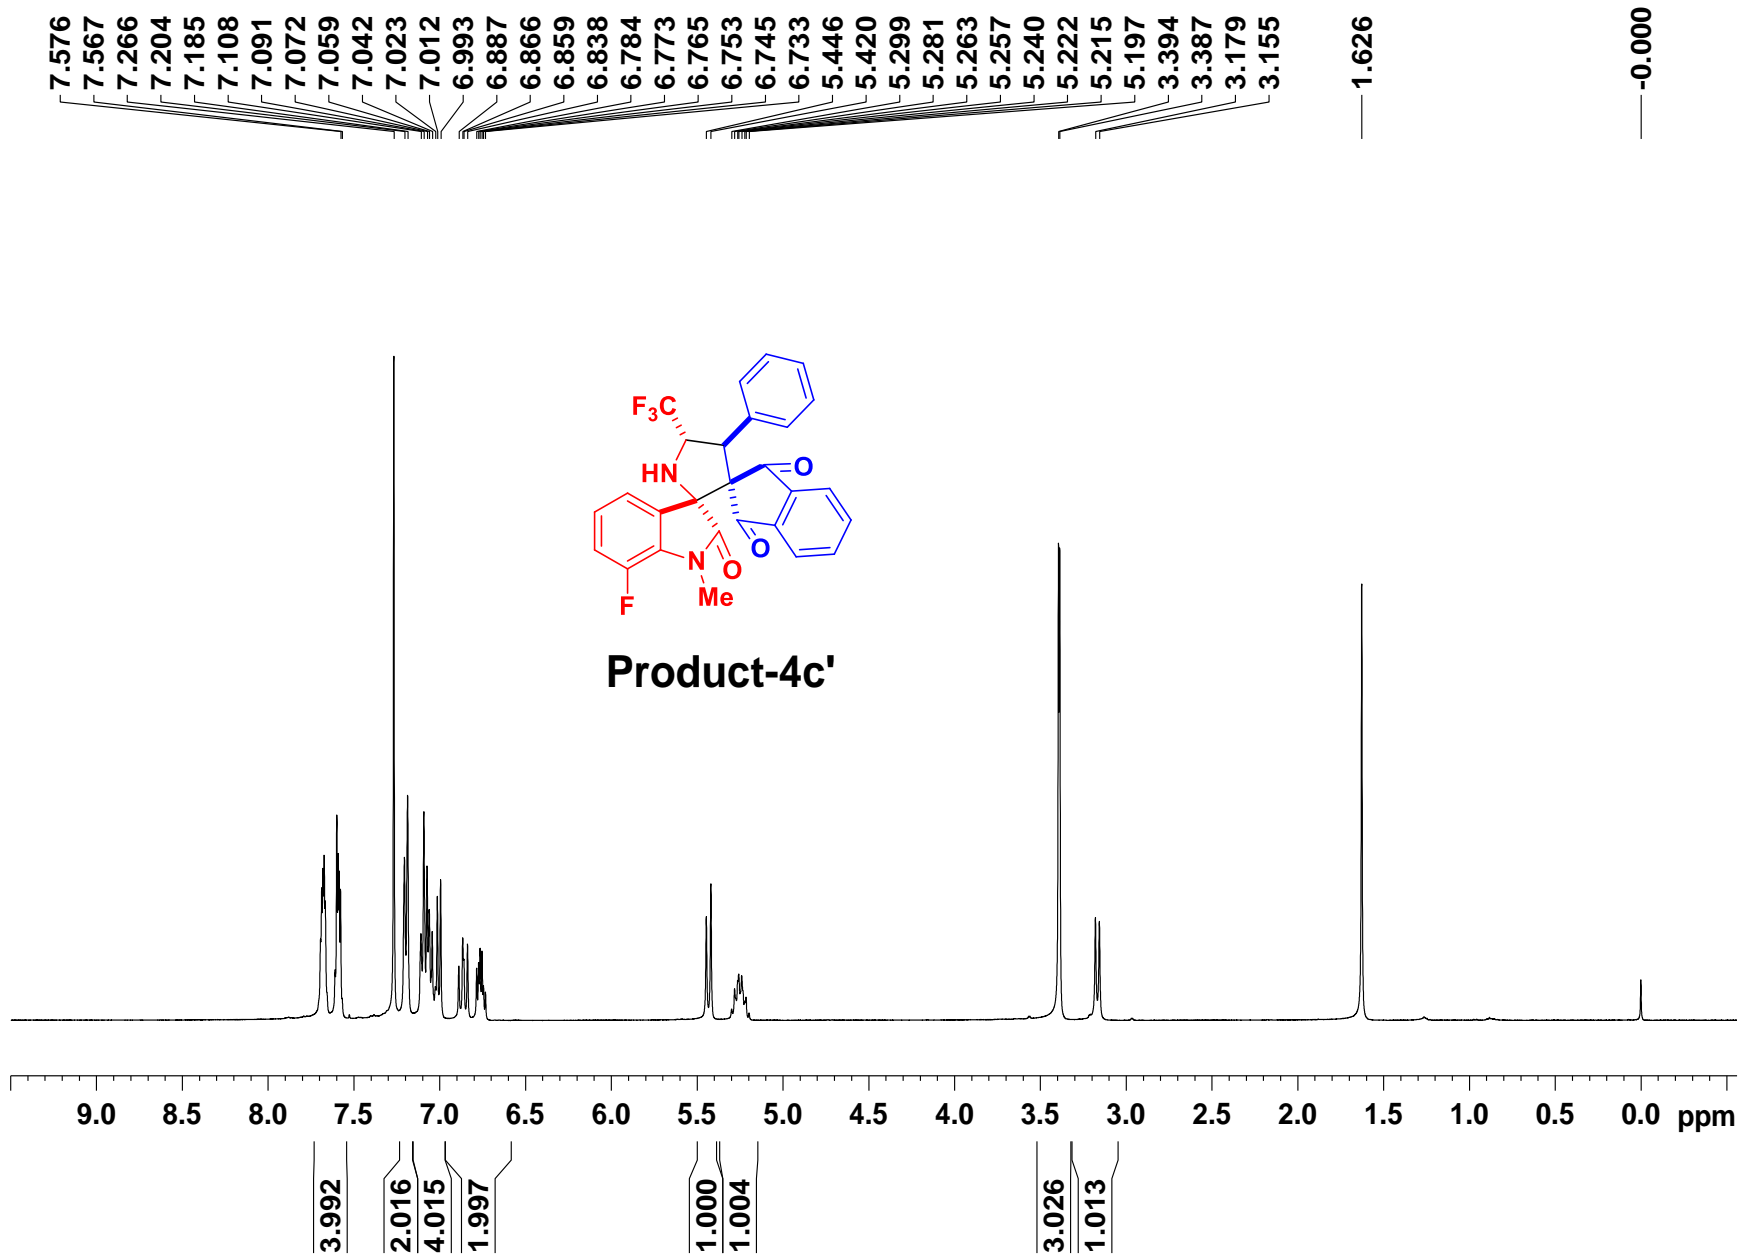

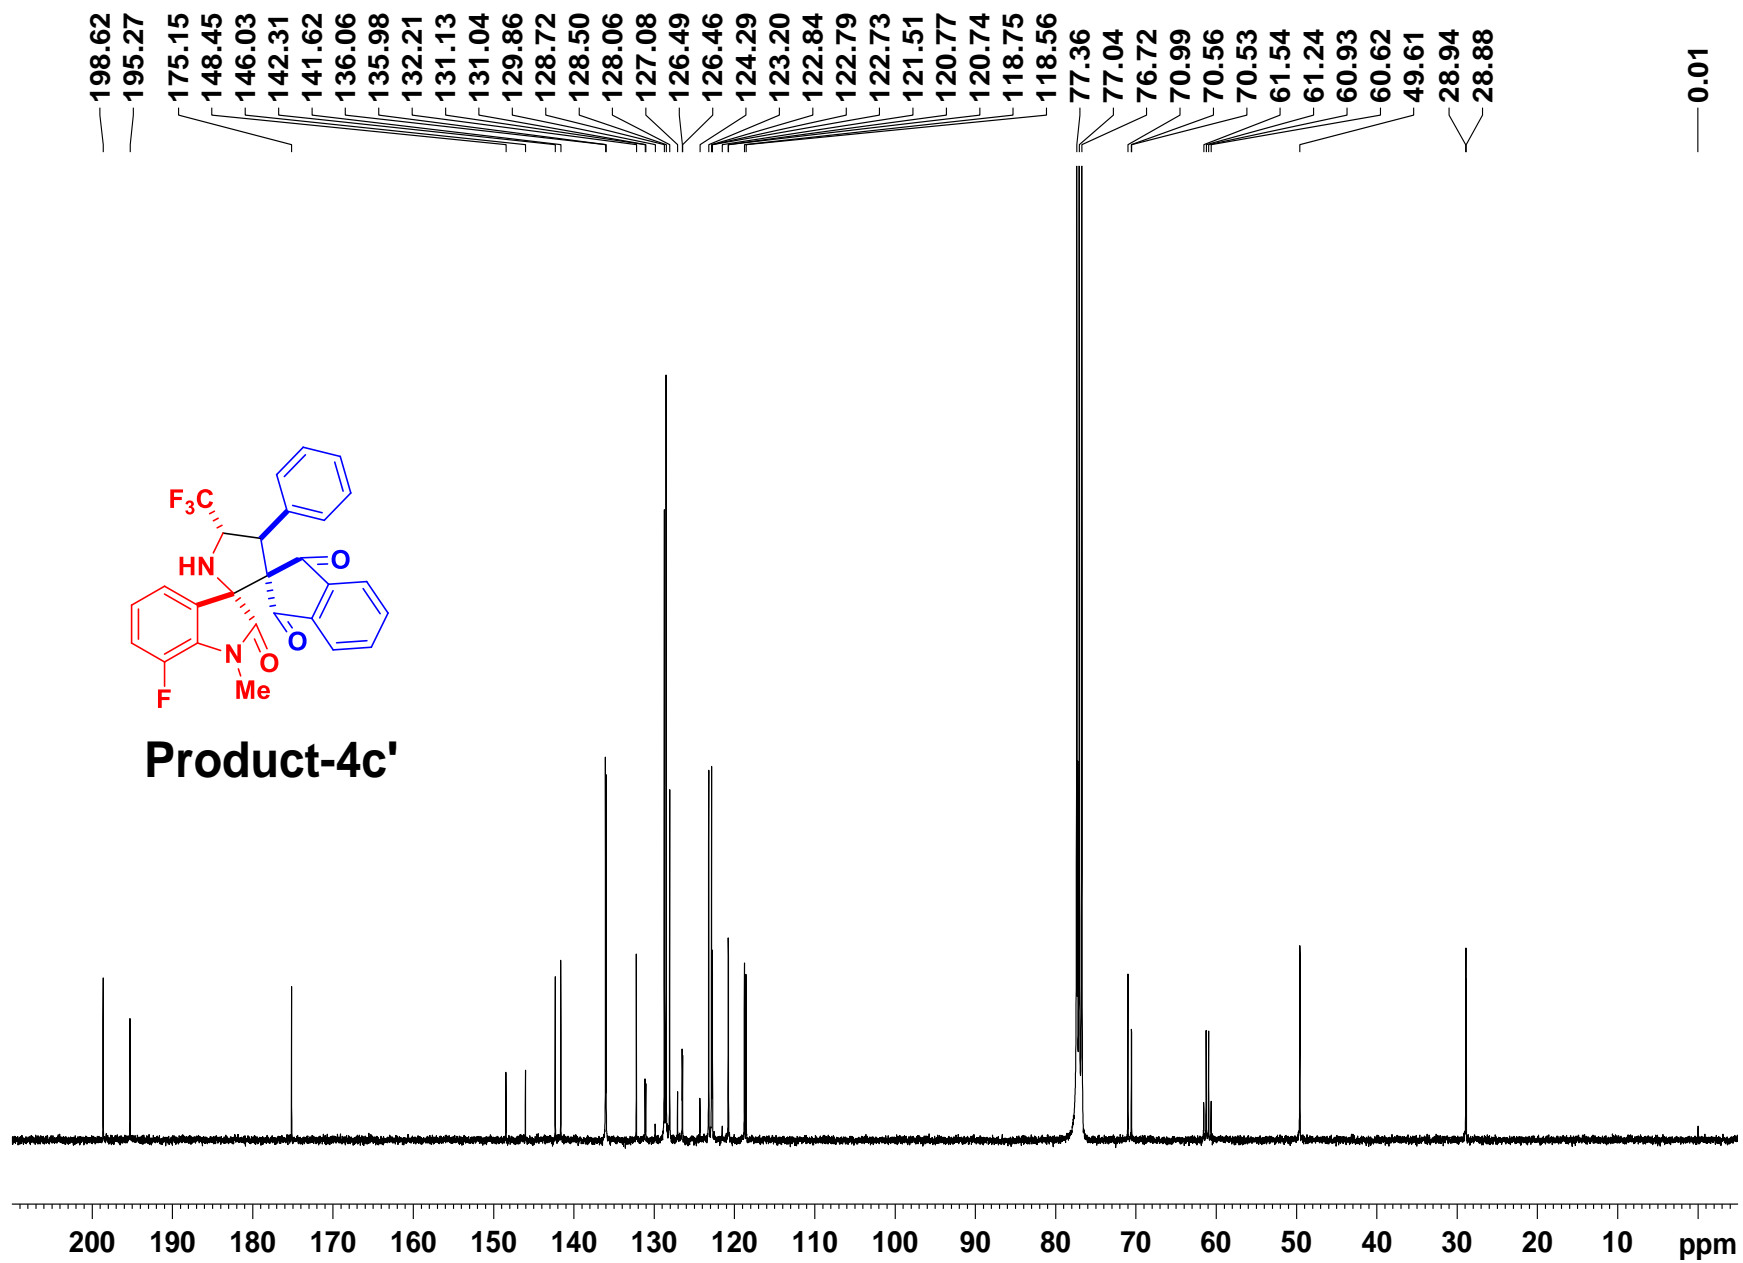



4c'.2.fid  
Product-4c'

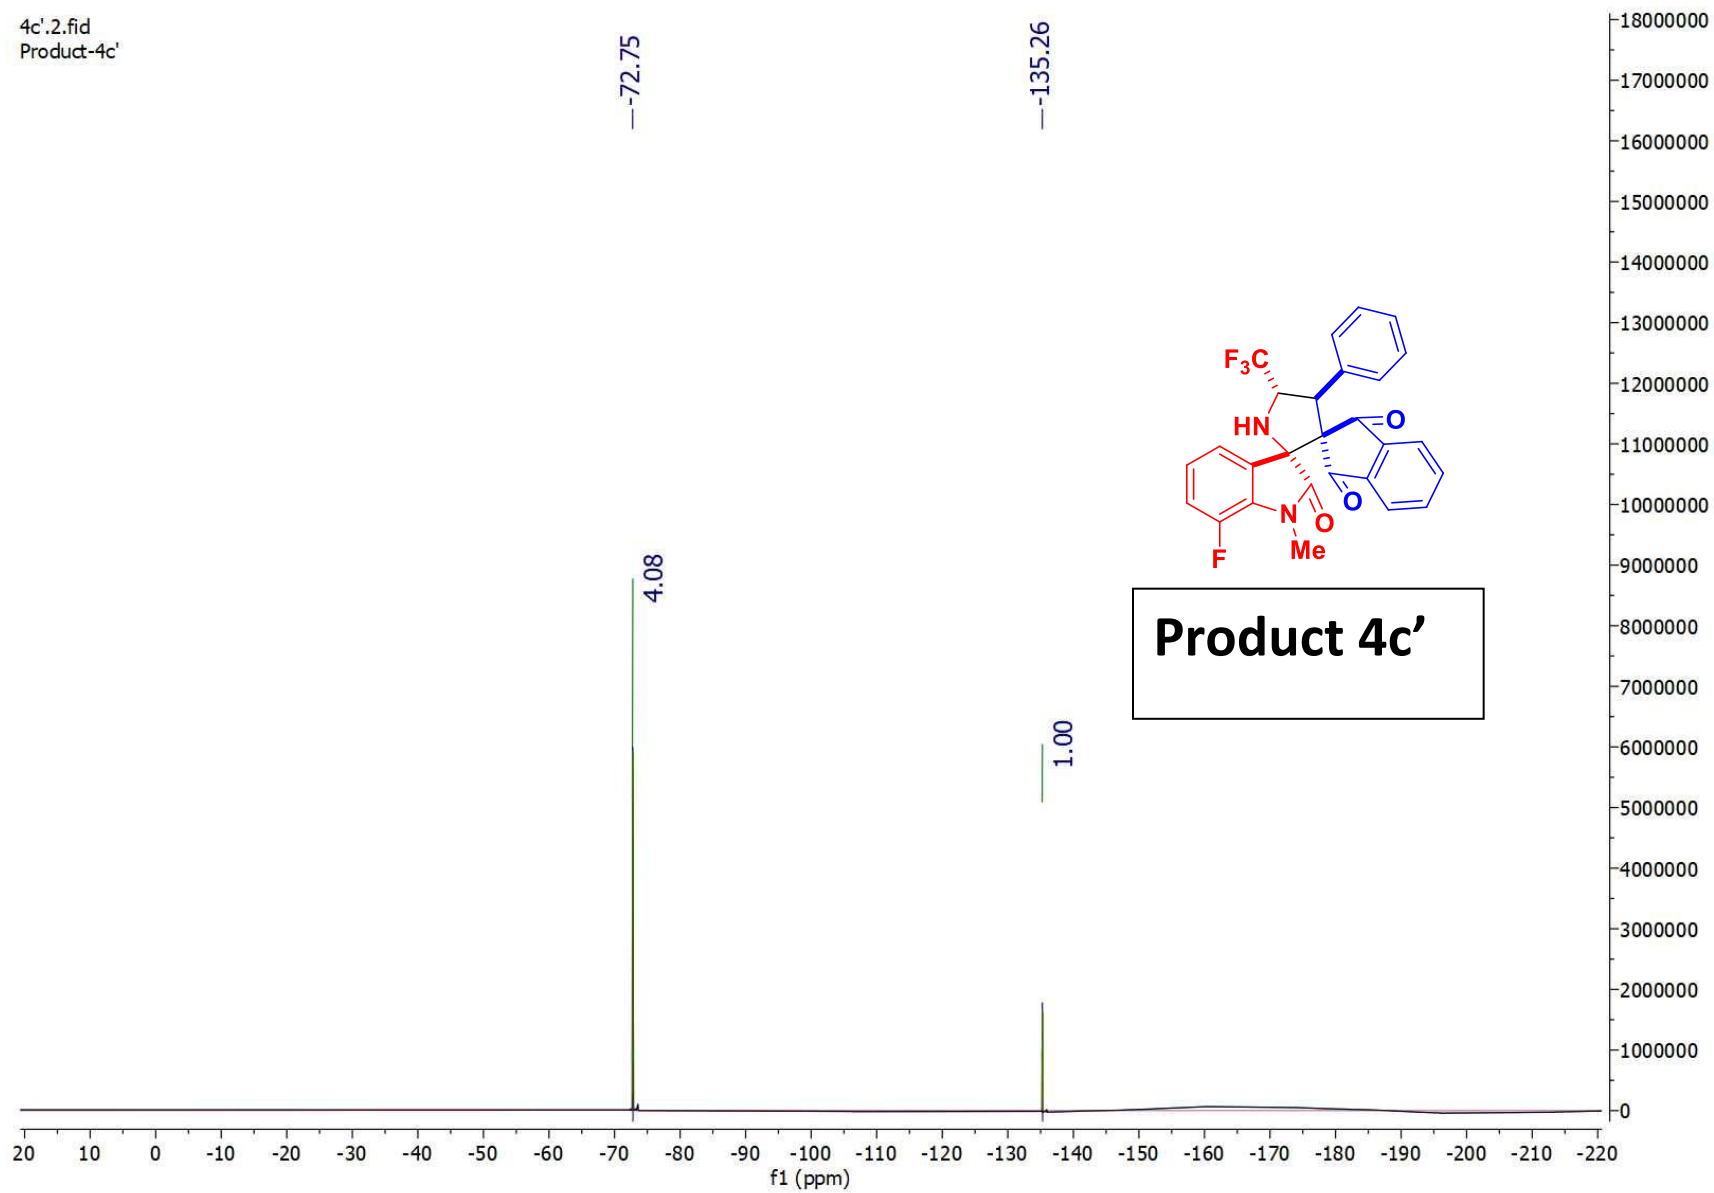

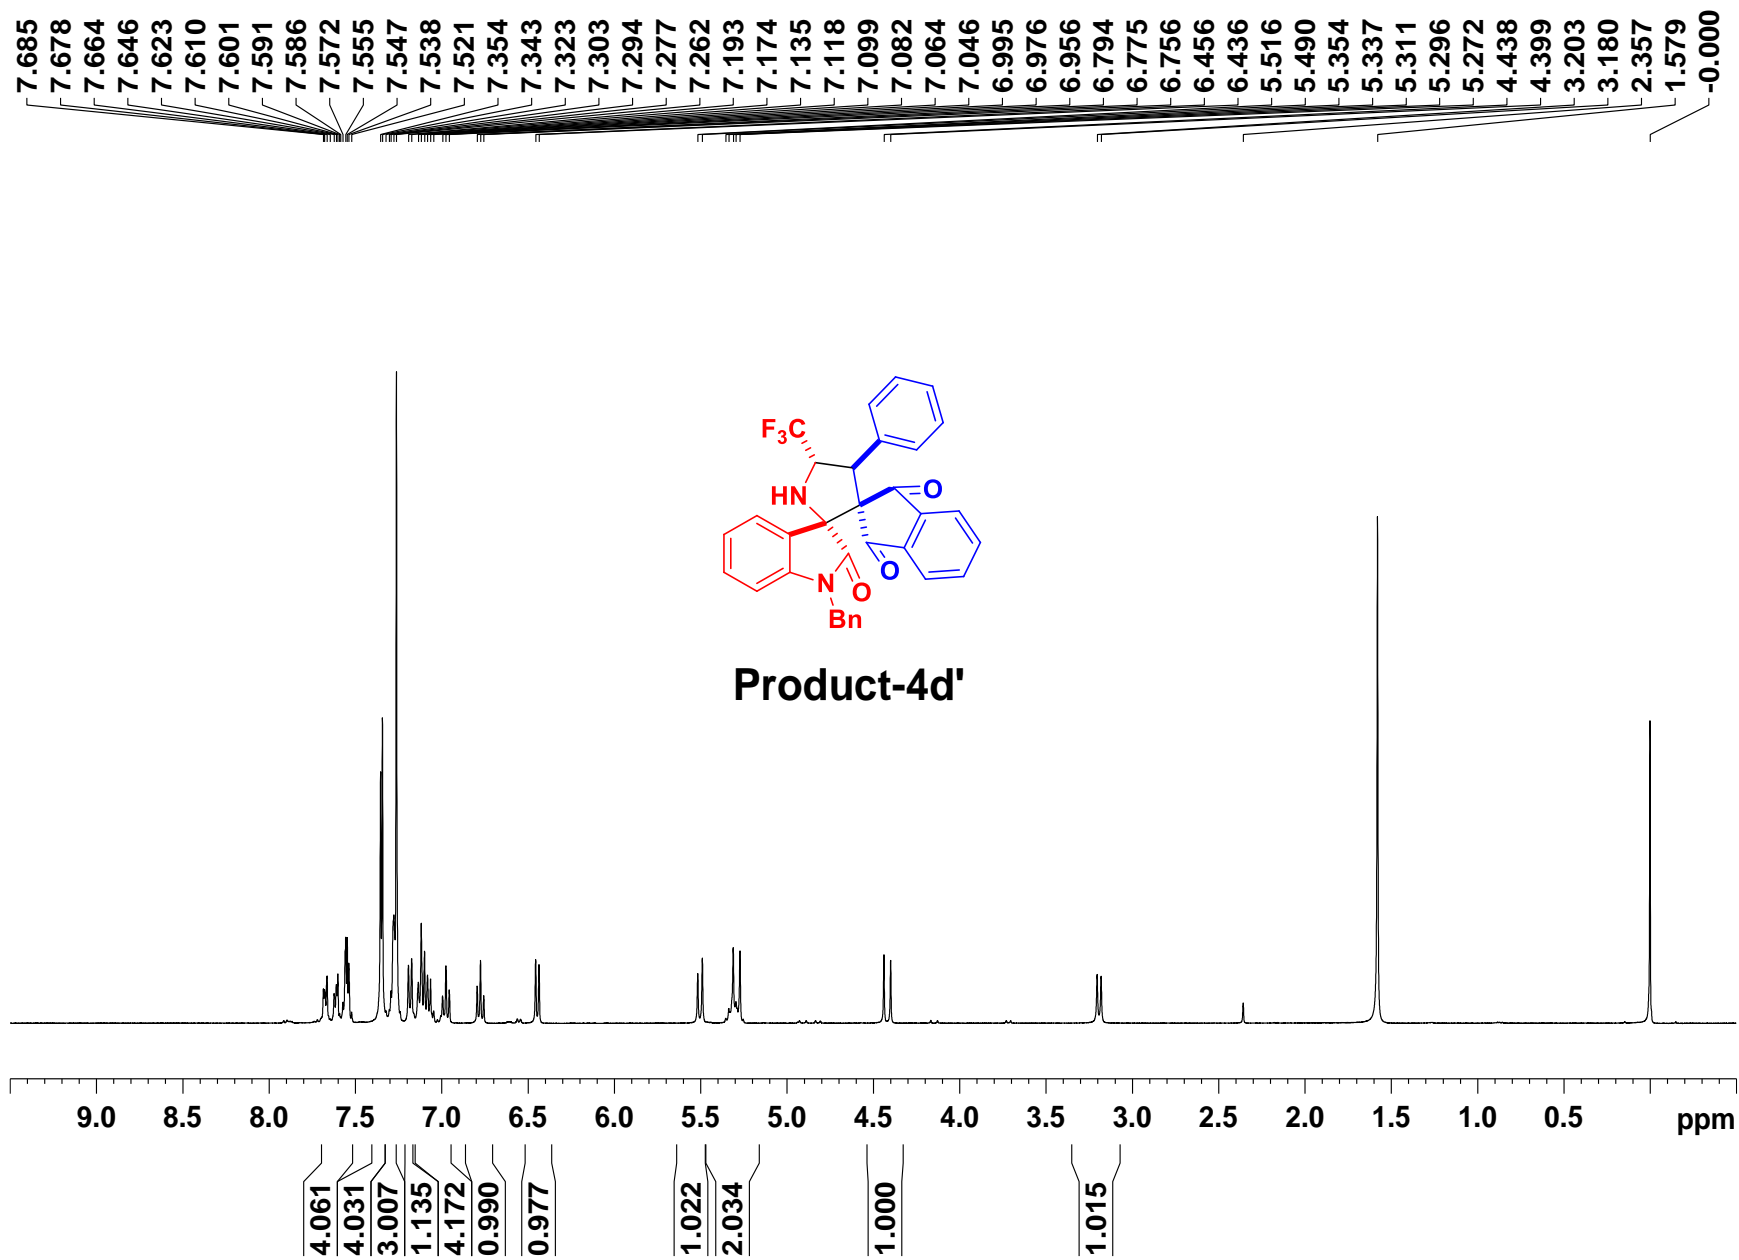

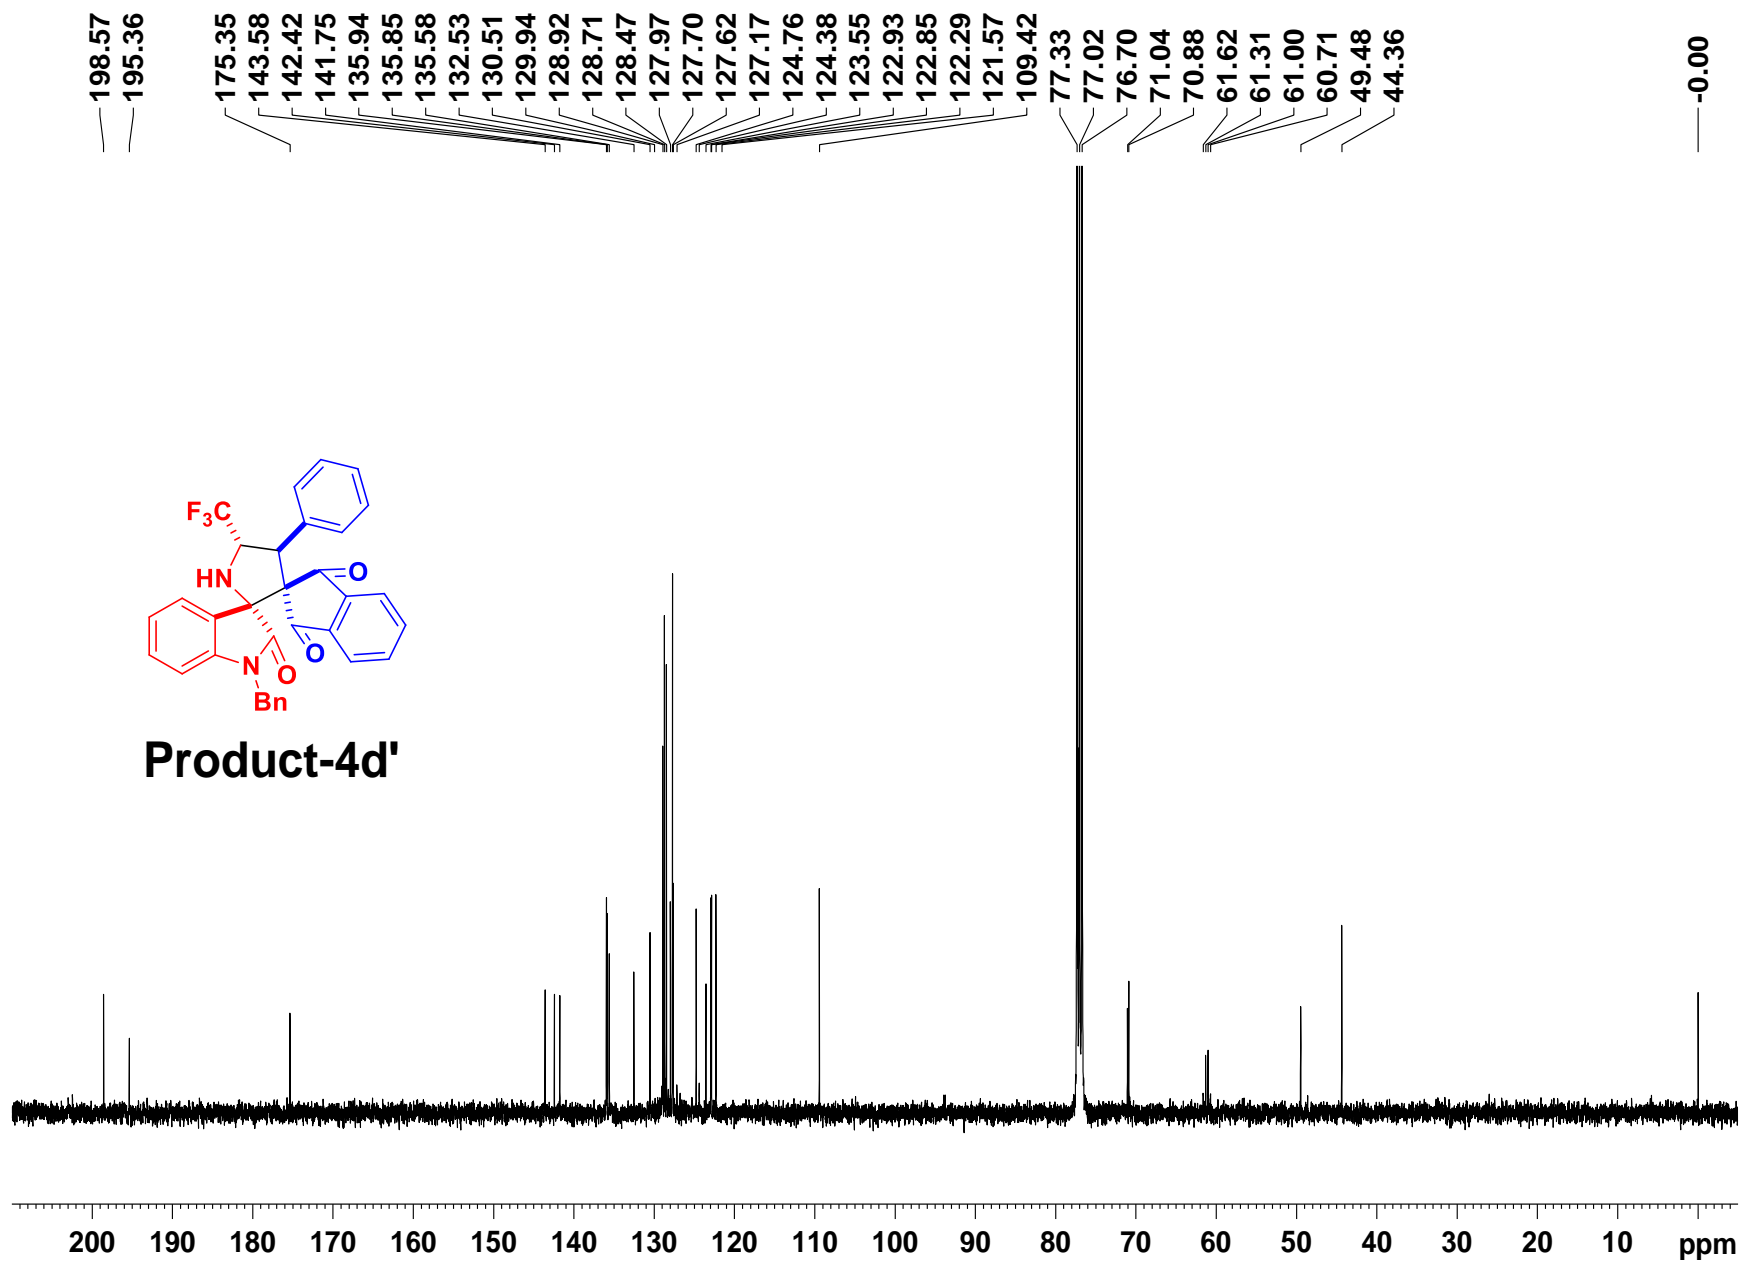

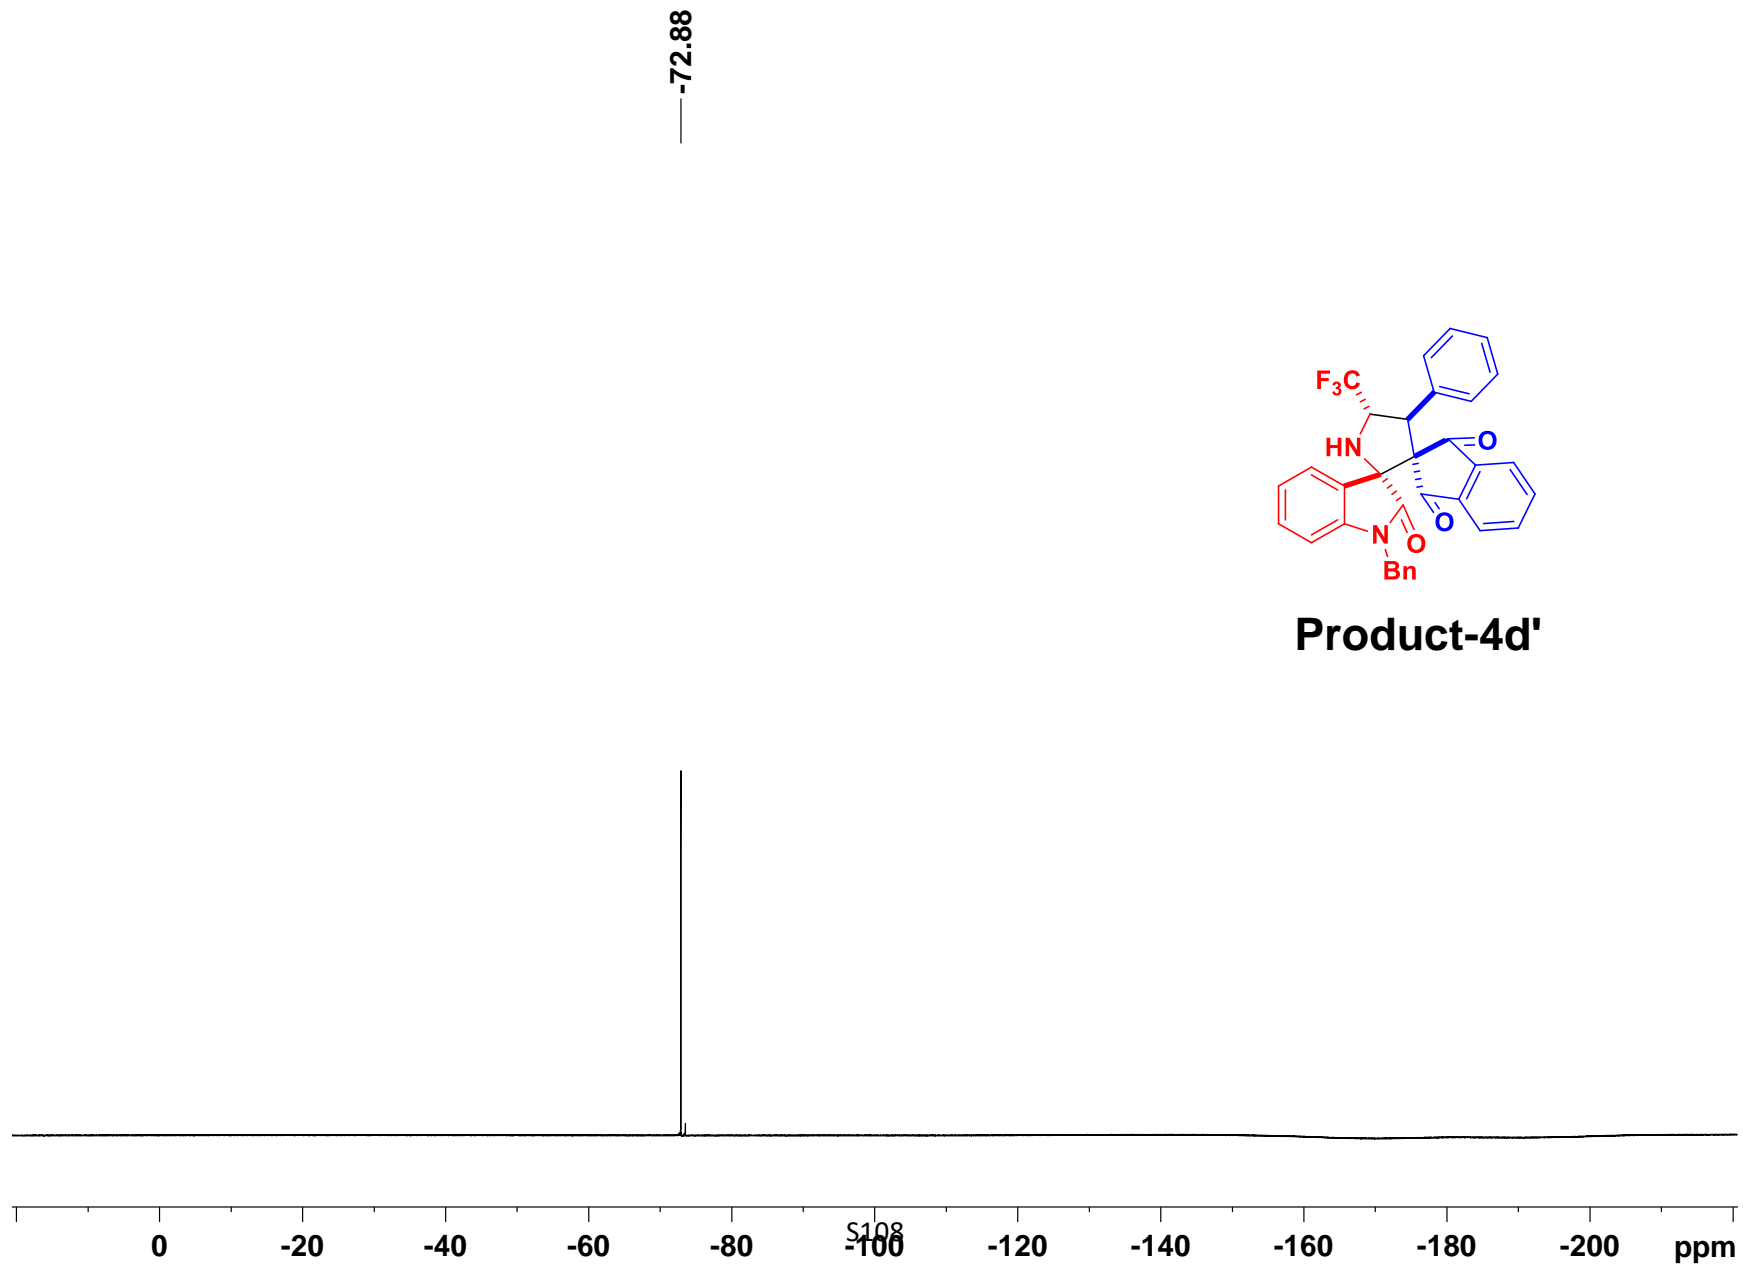

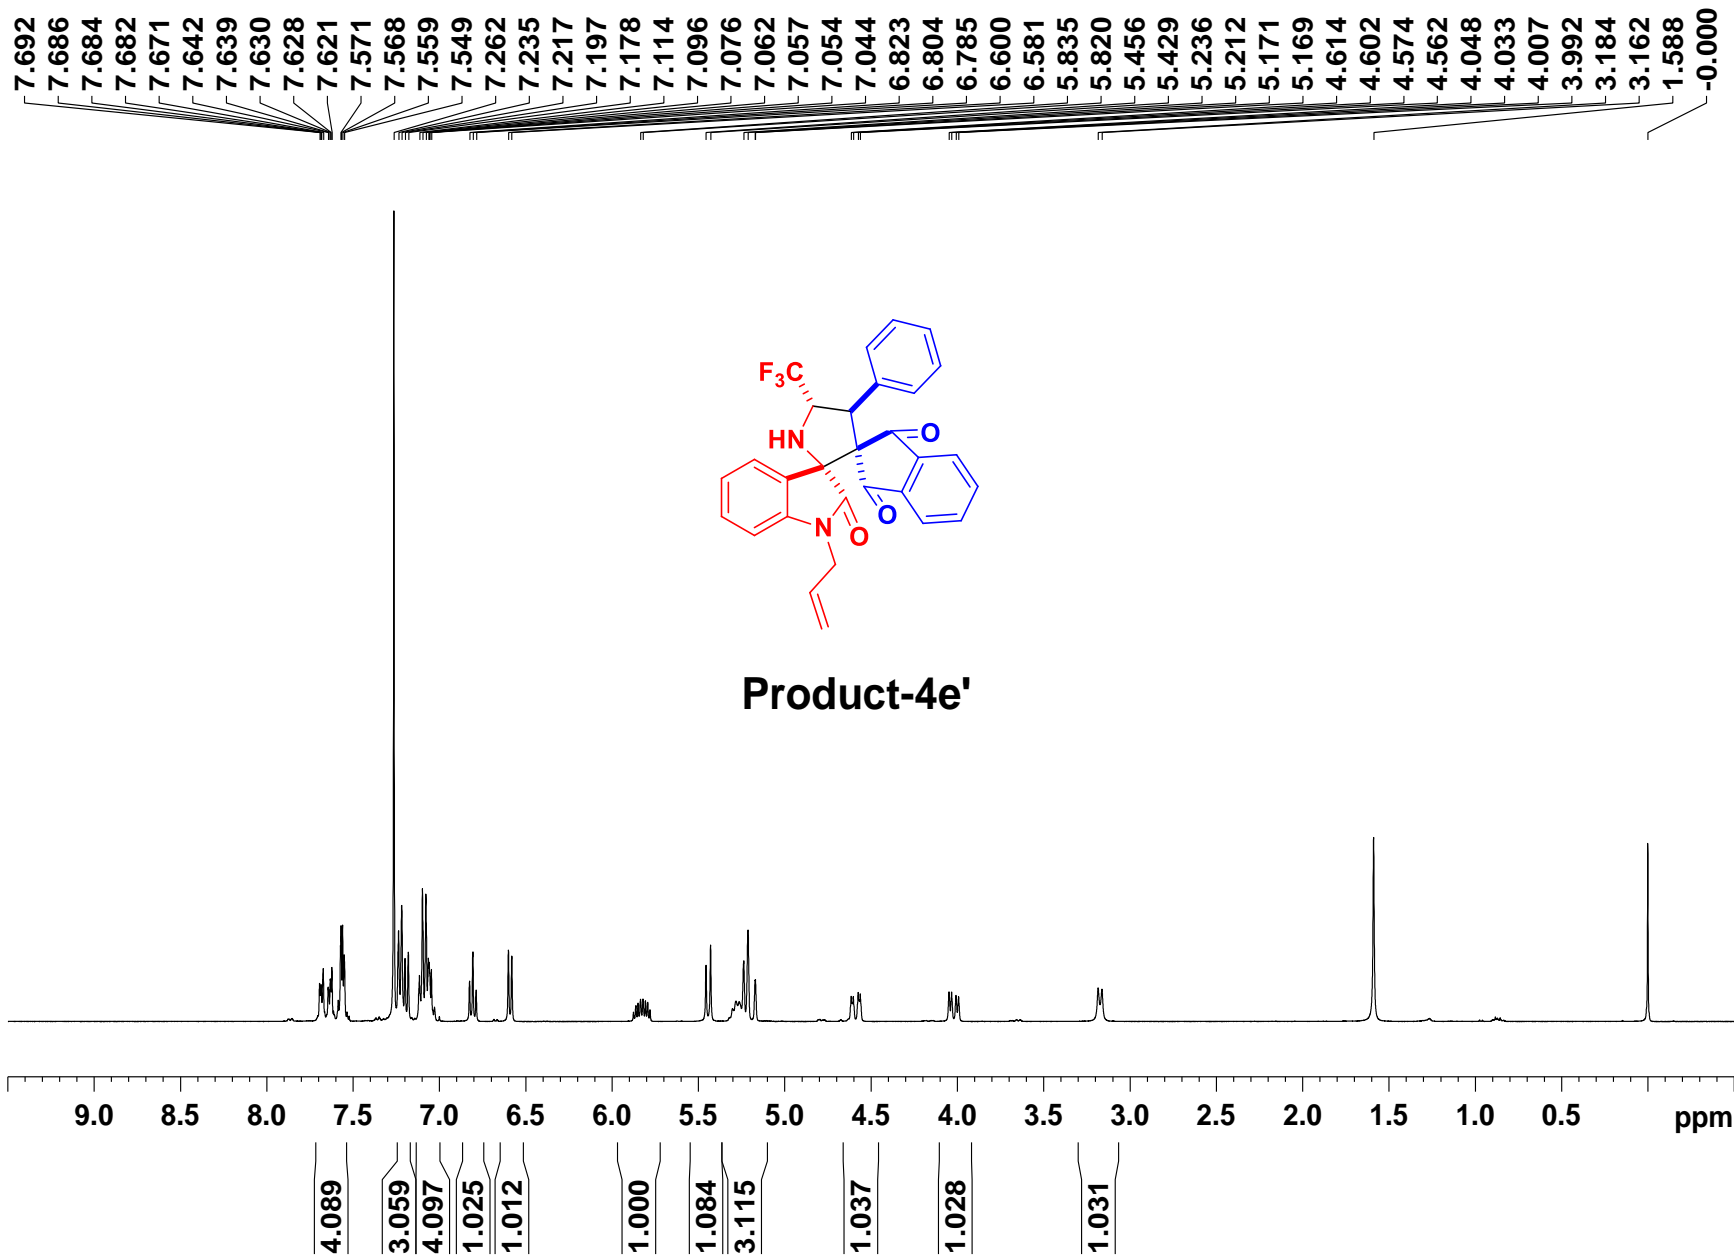

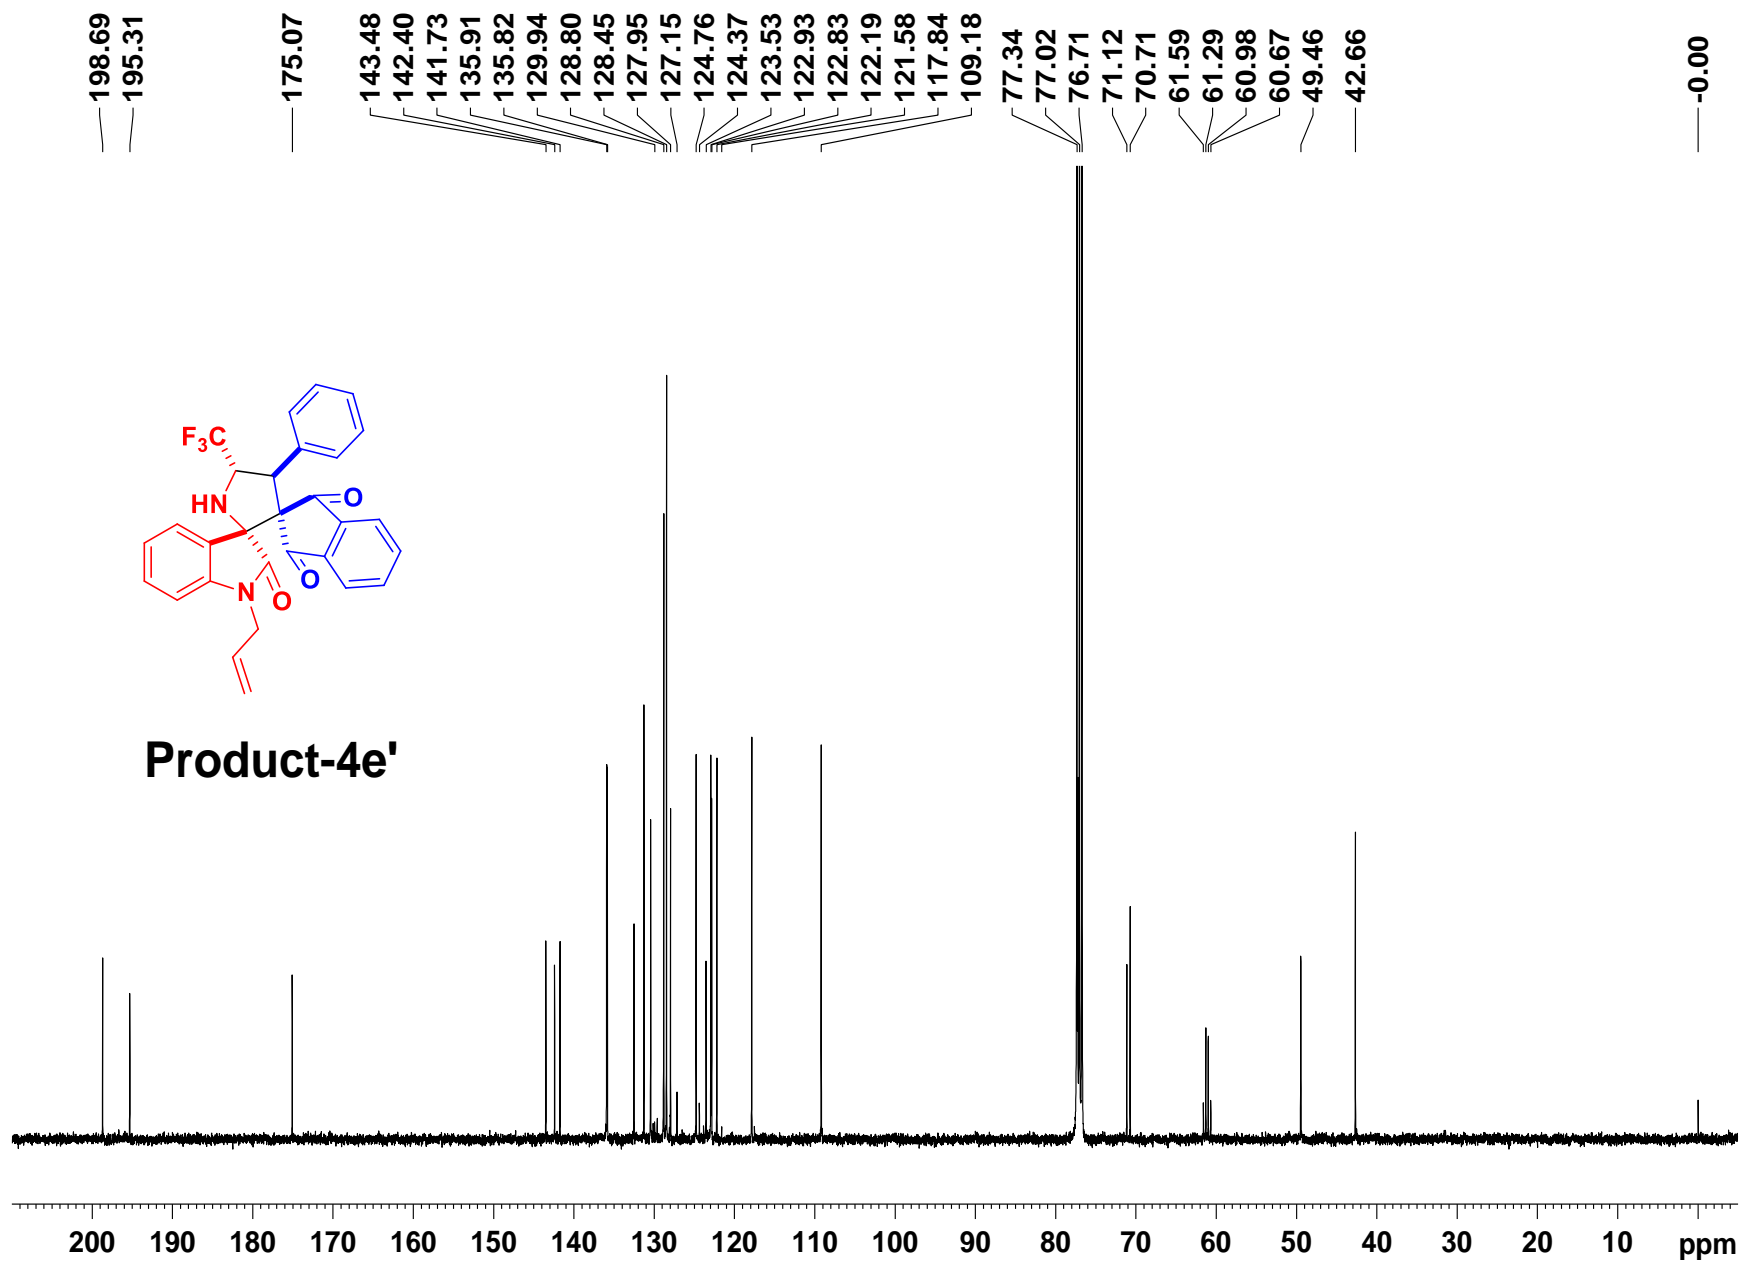

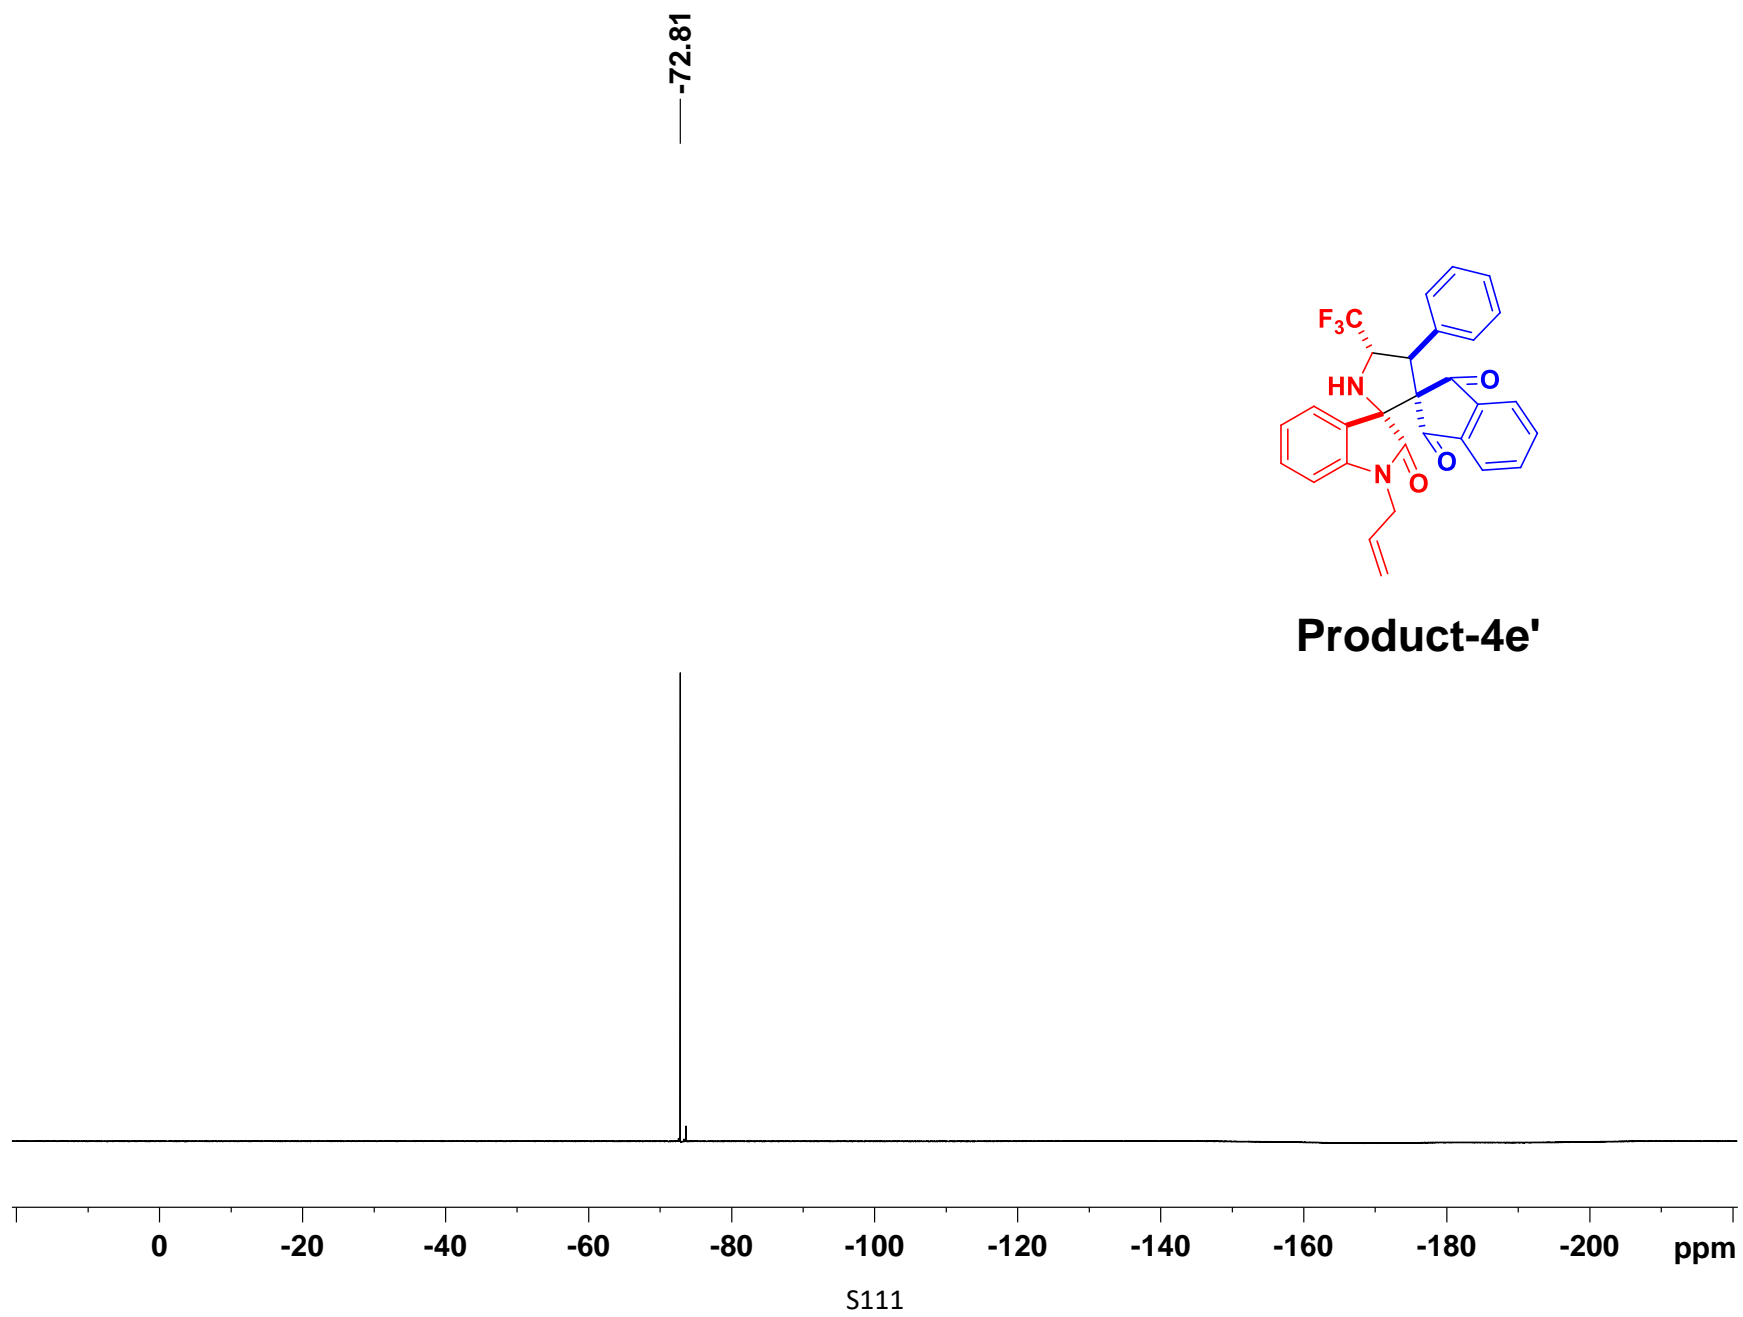

7.682  
7.676  
7.669  
7.661  
7.632  
7.623  
7.617  
7.611  
7.576  
7.562  
7.557  
7.549  
7.540  
7.266  
7.227  
7.222  
7.208  
7.204  
7.164  
7.145  
7.126  
7.108  
7.091  
7.072  
7.057  
7.046  
7.040  
6.878  
6.859  
6.840  
6.821  
5.404  
5.377  
5.288  
5.283  
5.265  
4.581  
4.575  
4.537  
4.531  
4.430  
4.424  
4.386  
4.380  
3.205  
3.182  
2.227  
2.221  
2.215  
1.688  
-0.000

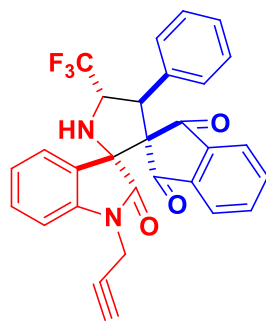

**Product-4f'**

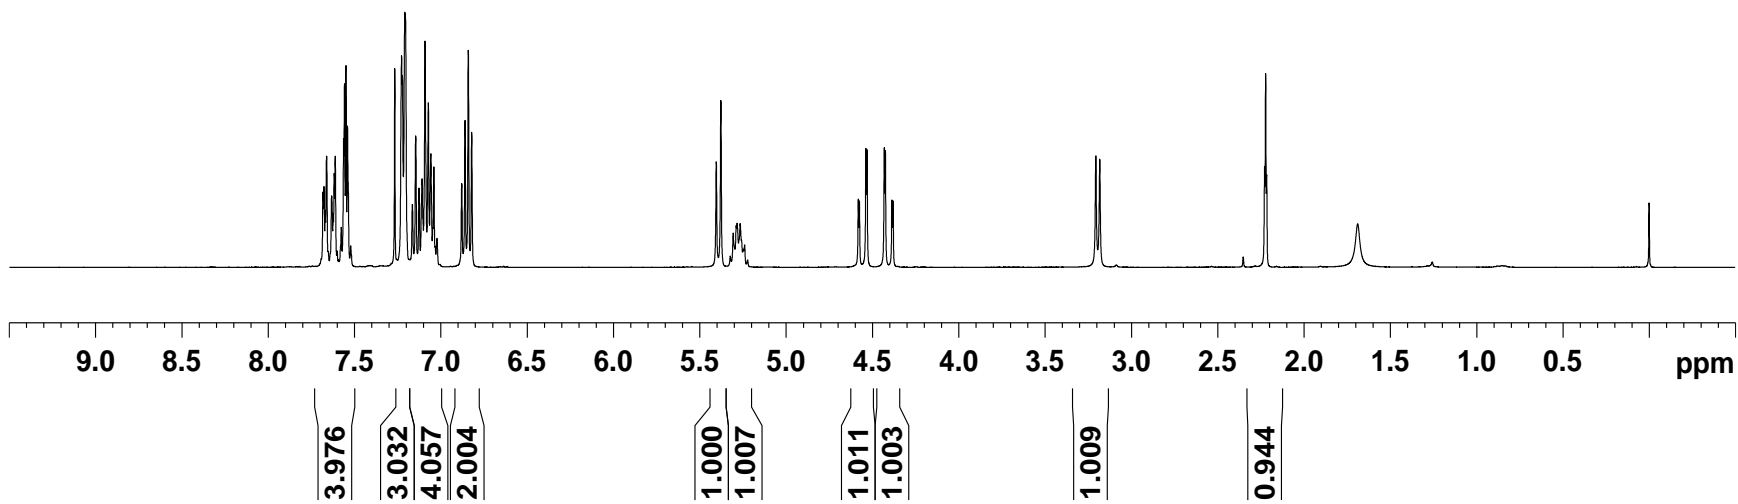



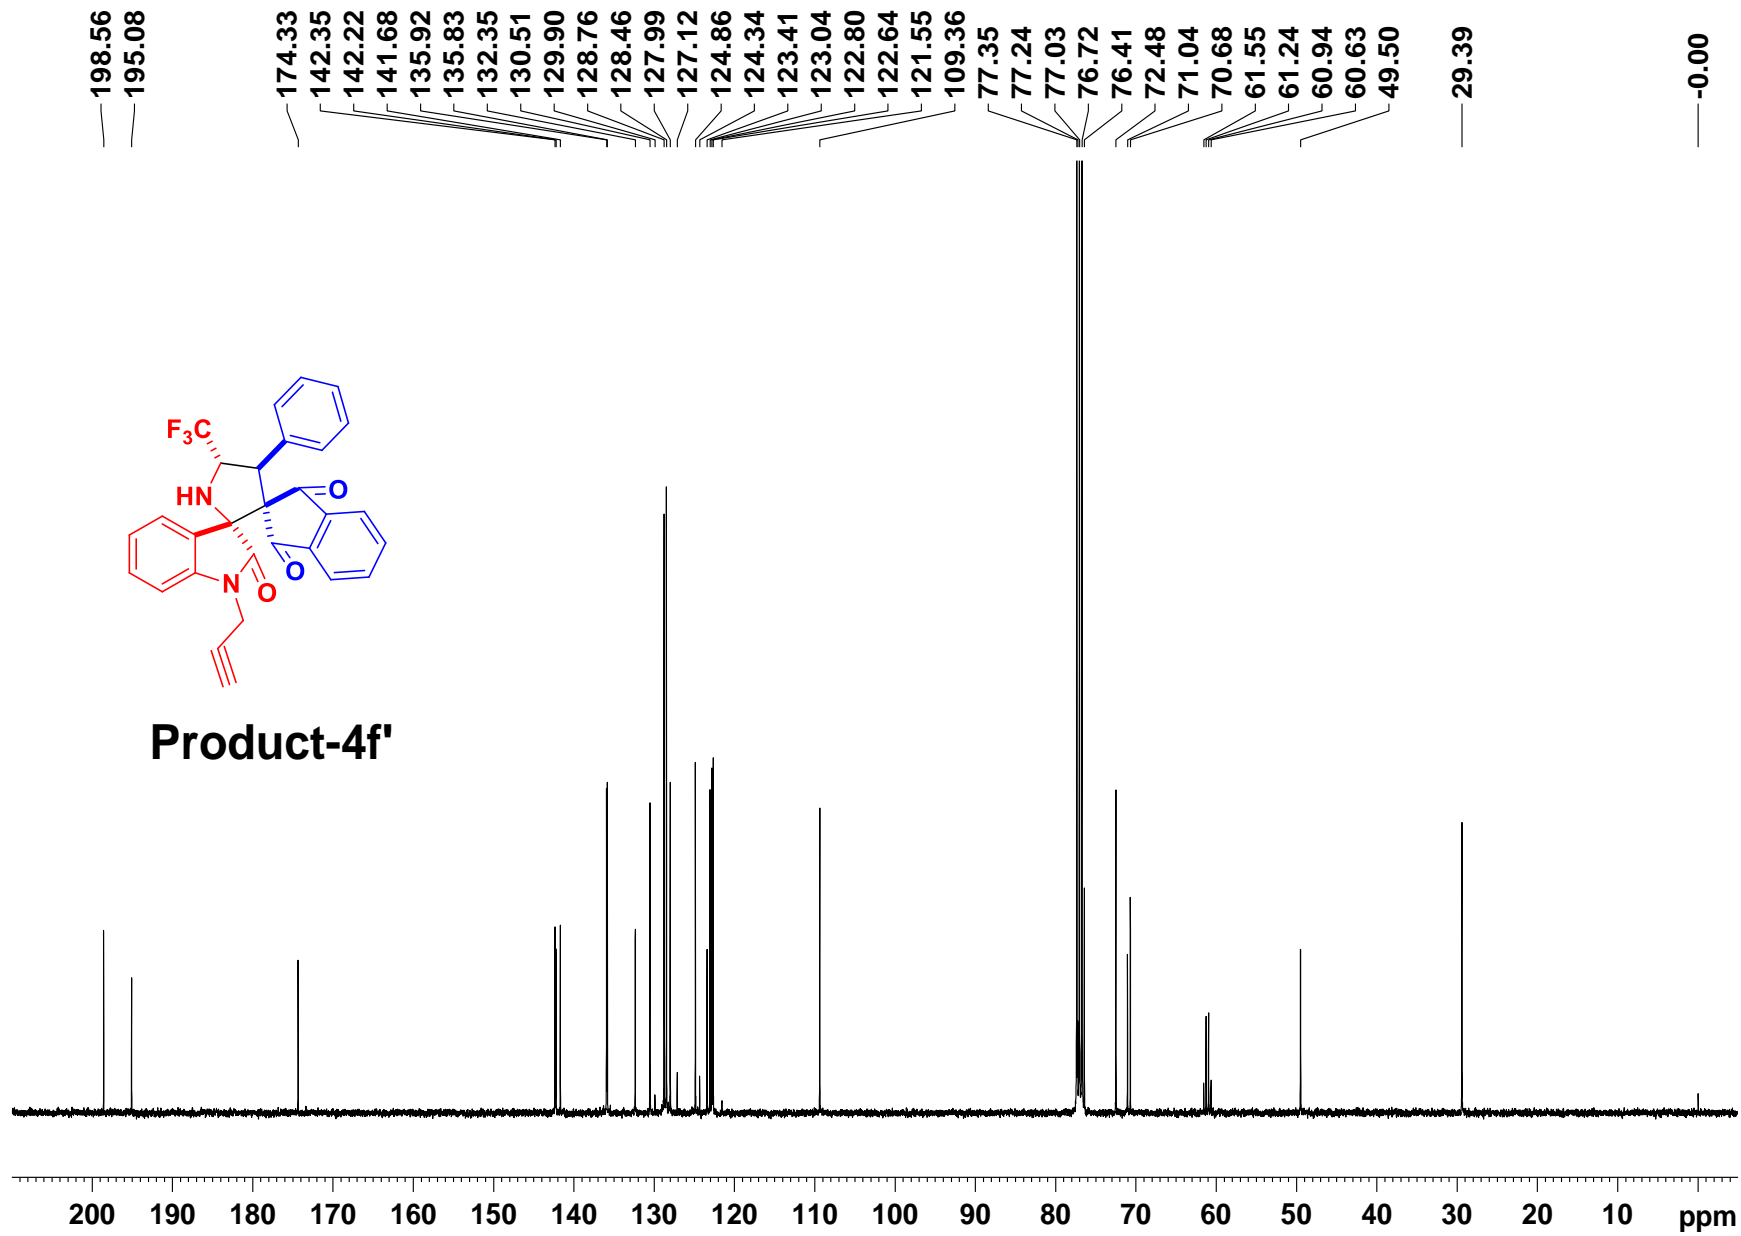

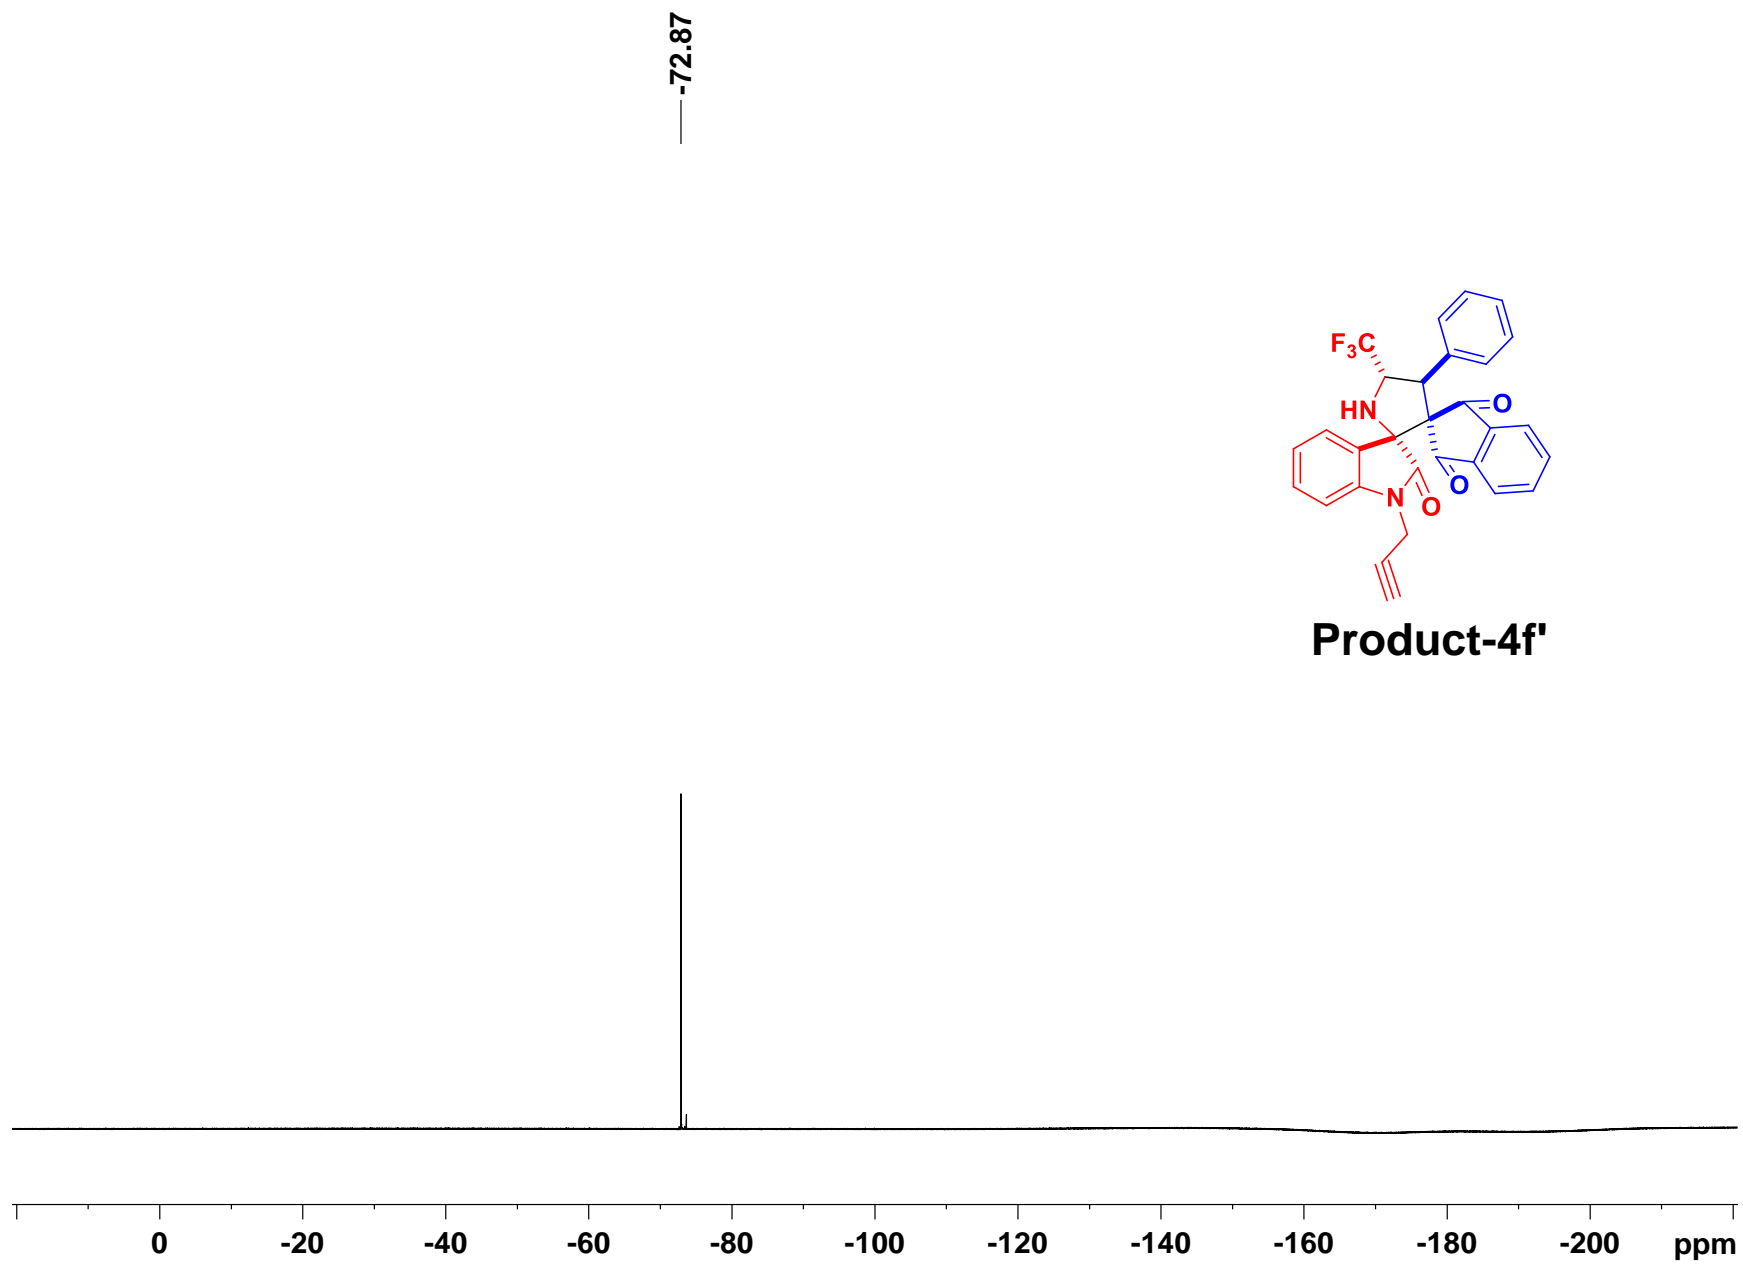

S114

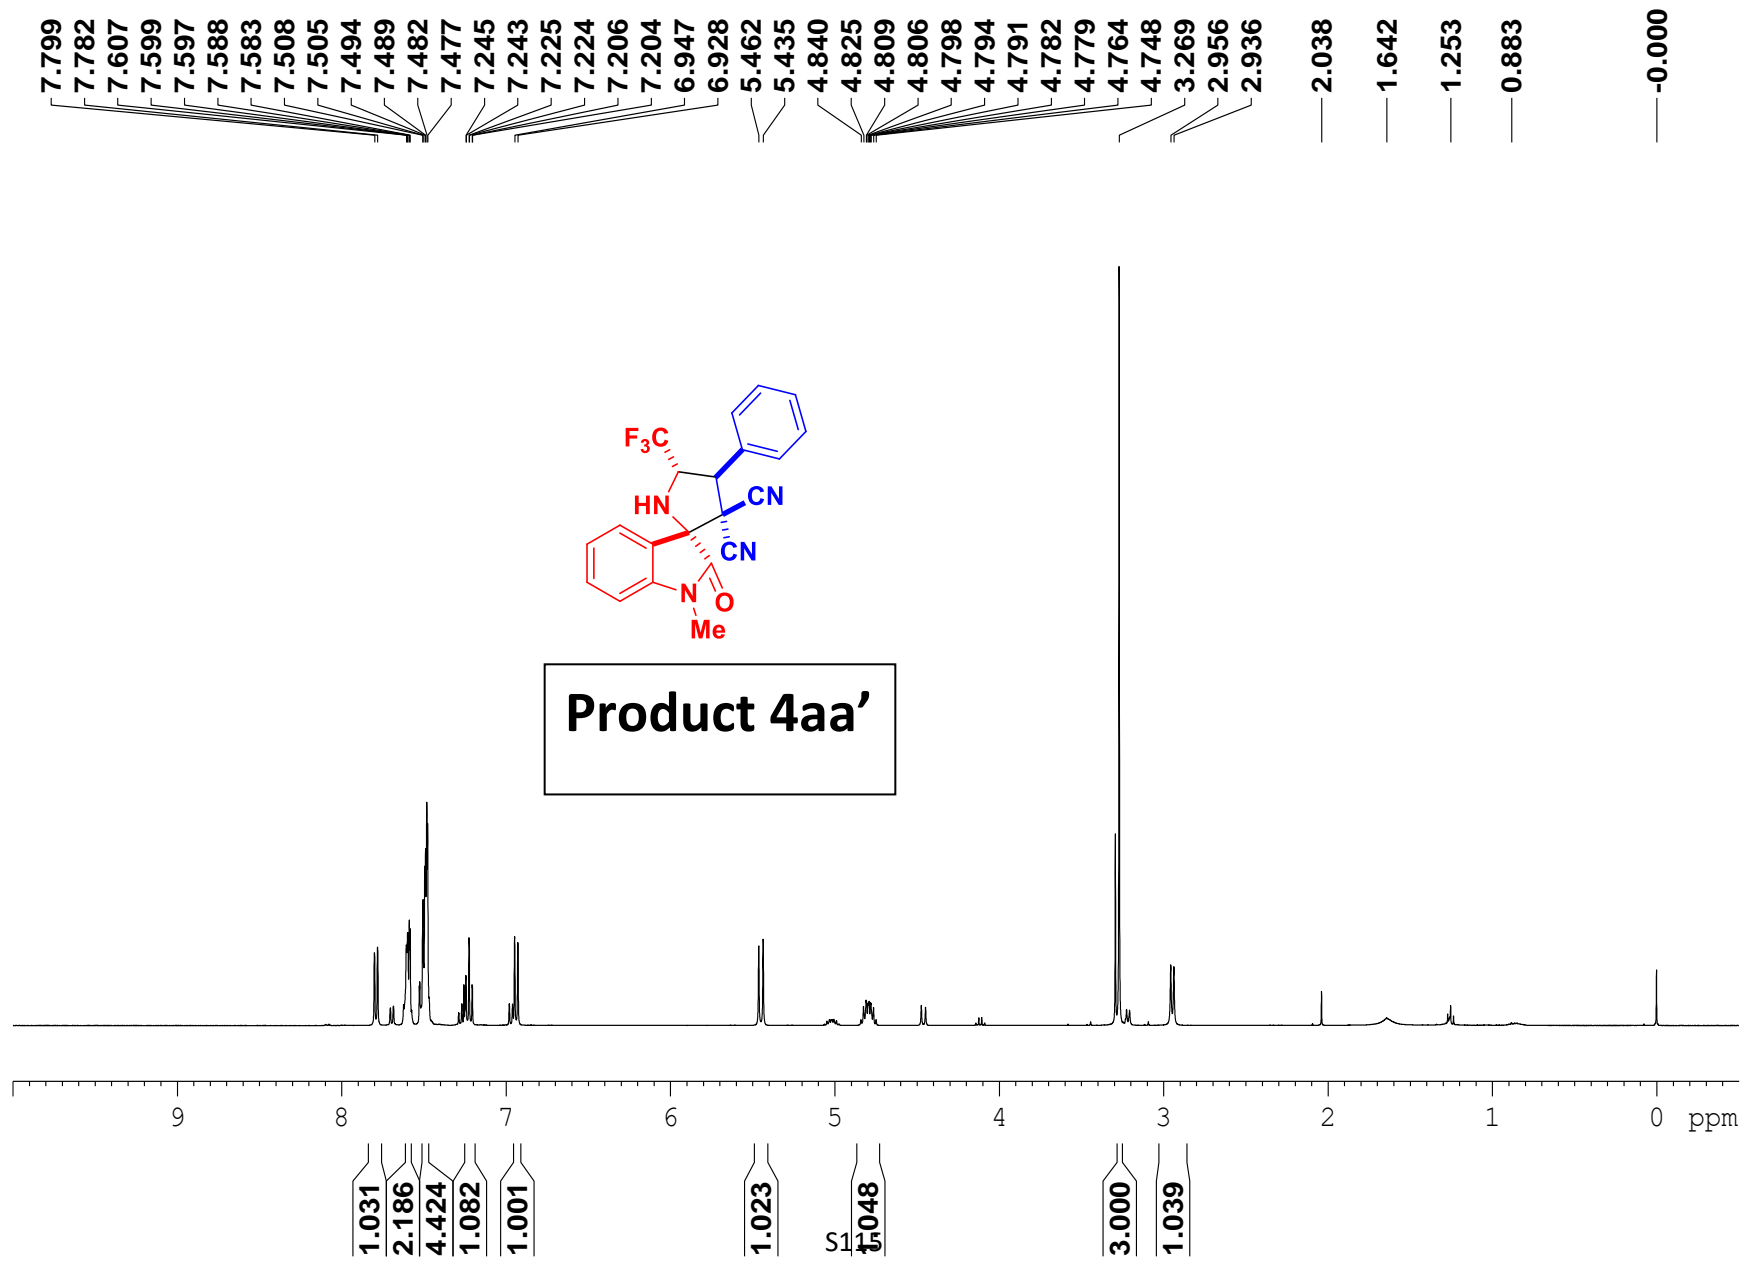

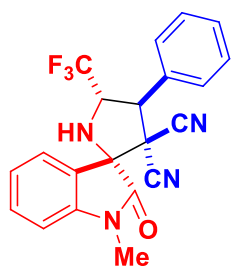

Product 4aa'

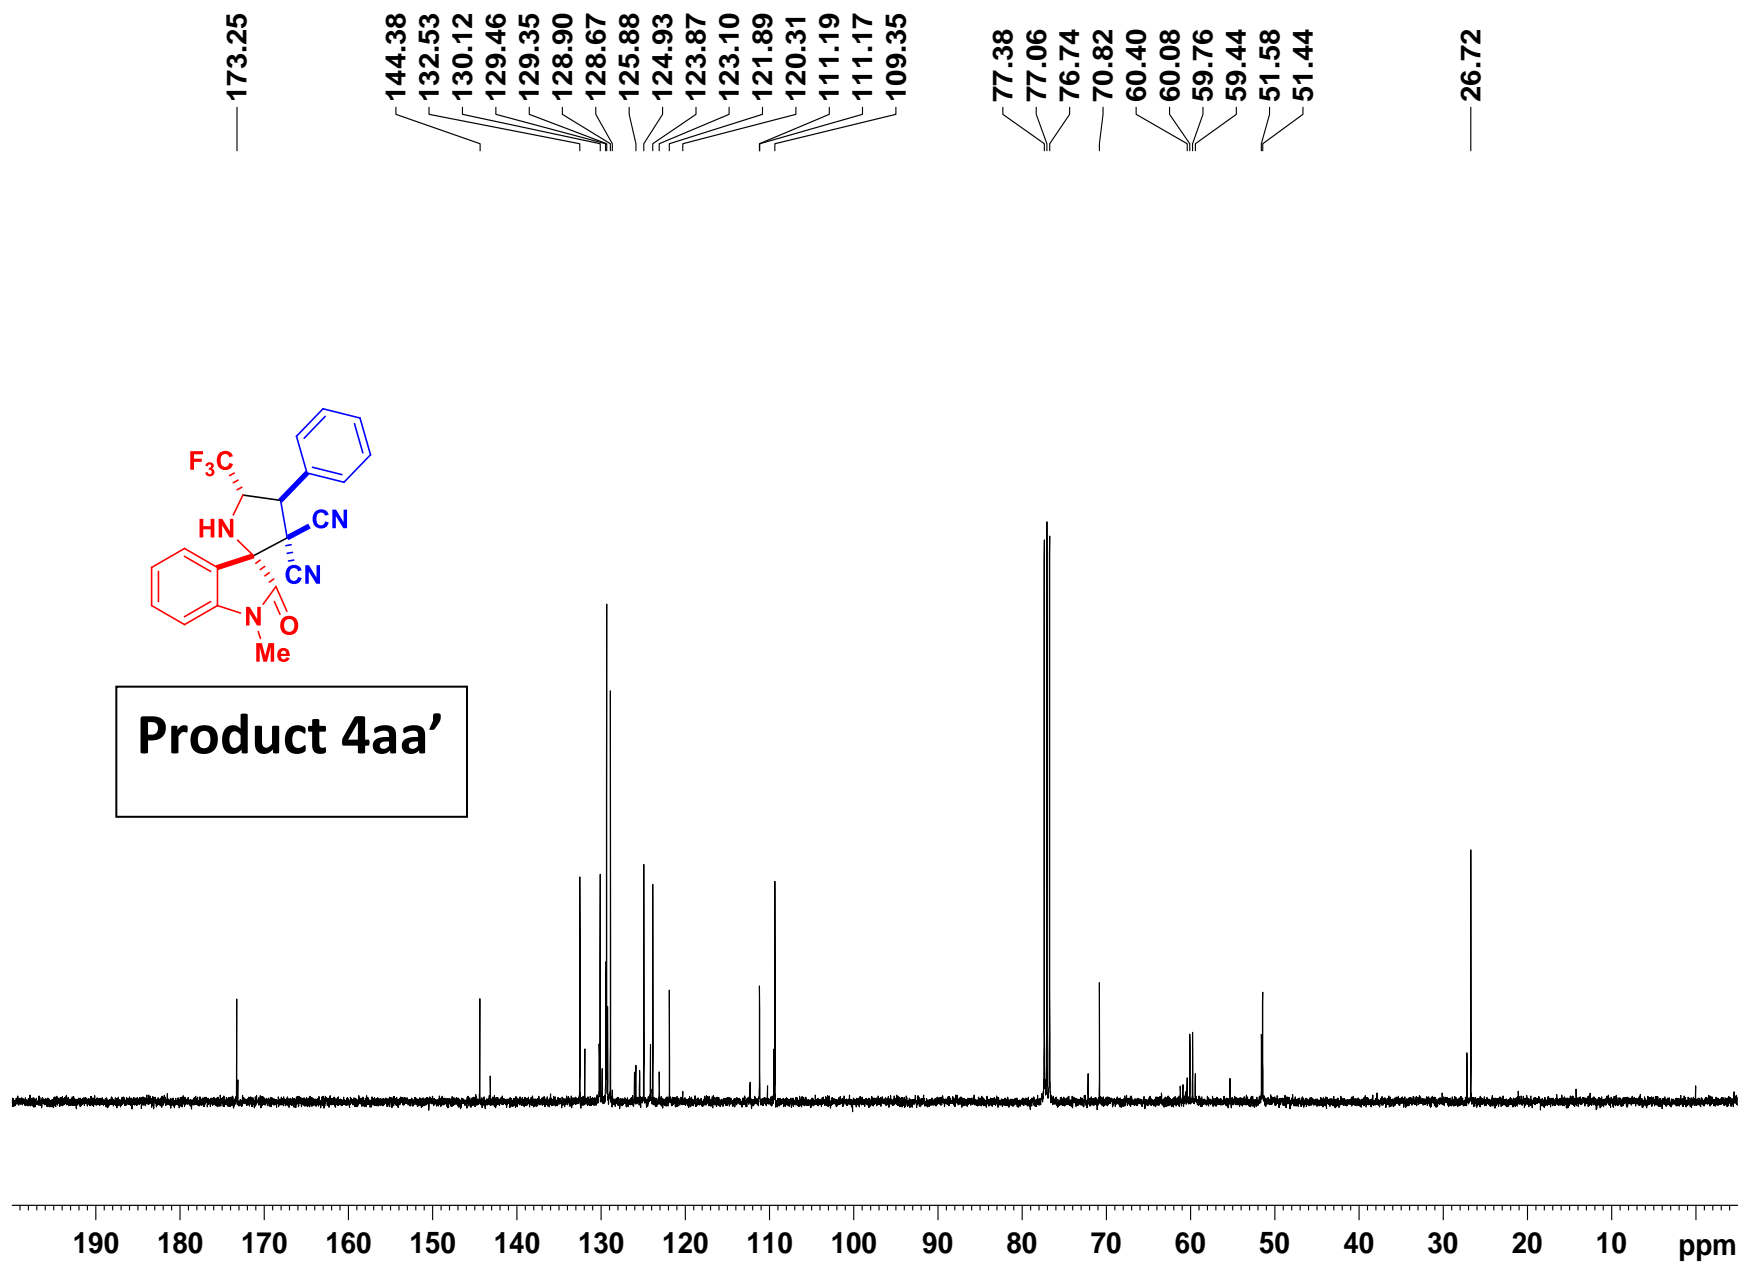

SB-IV-81.2.fid  
Product-4a''

-73.47  
-74.28

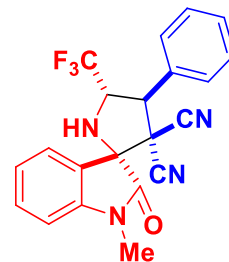

**Product 4aa'**

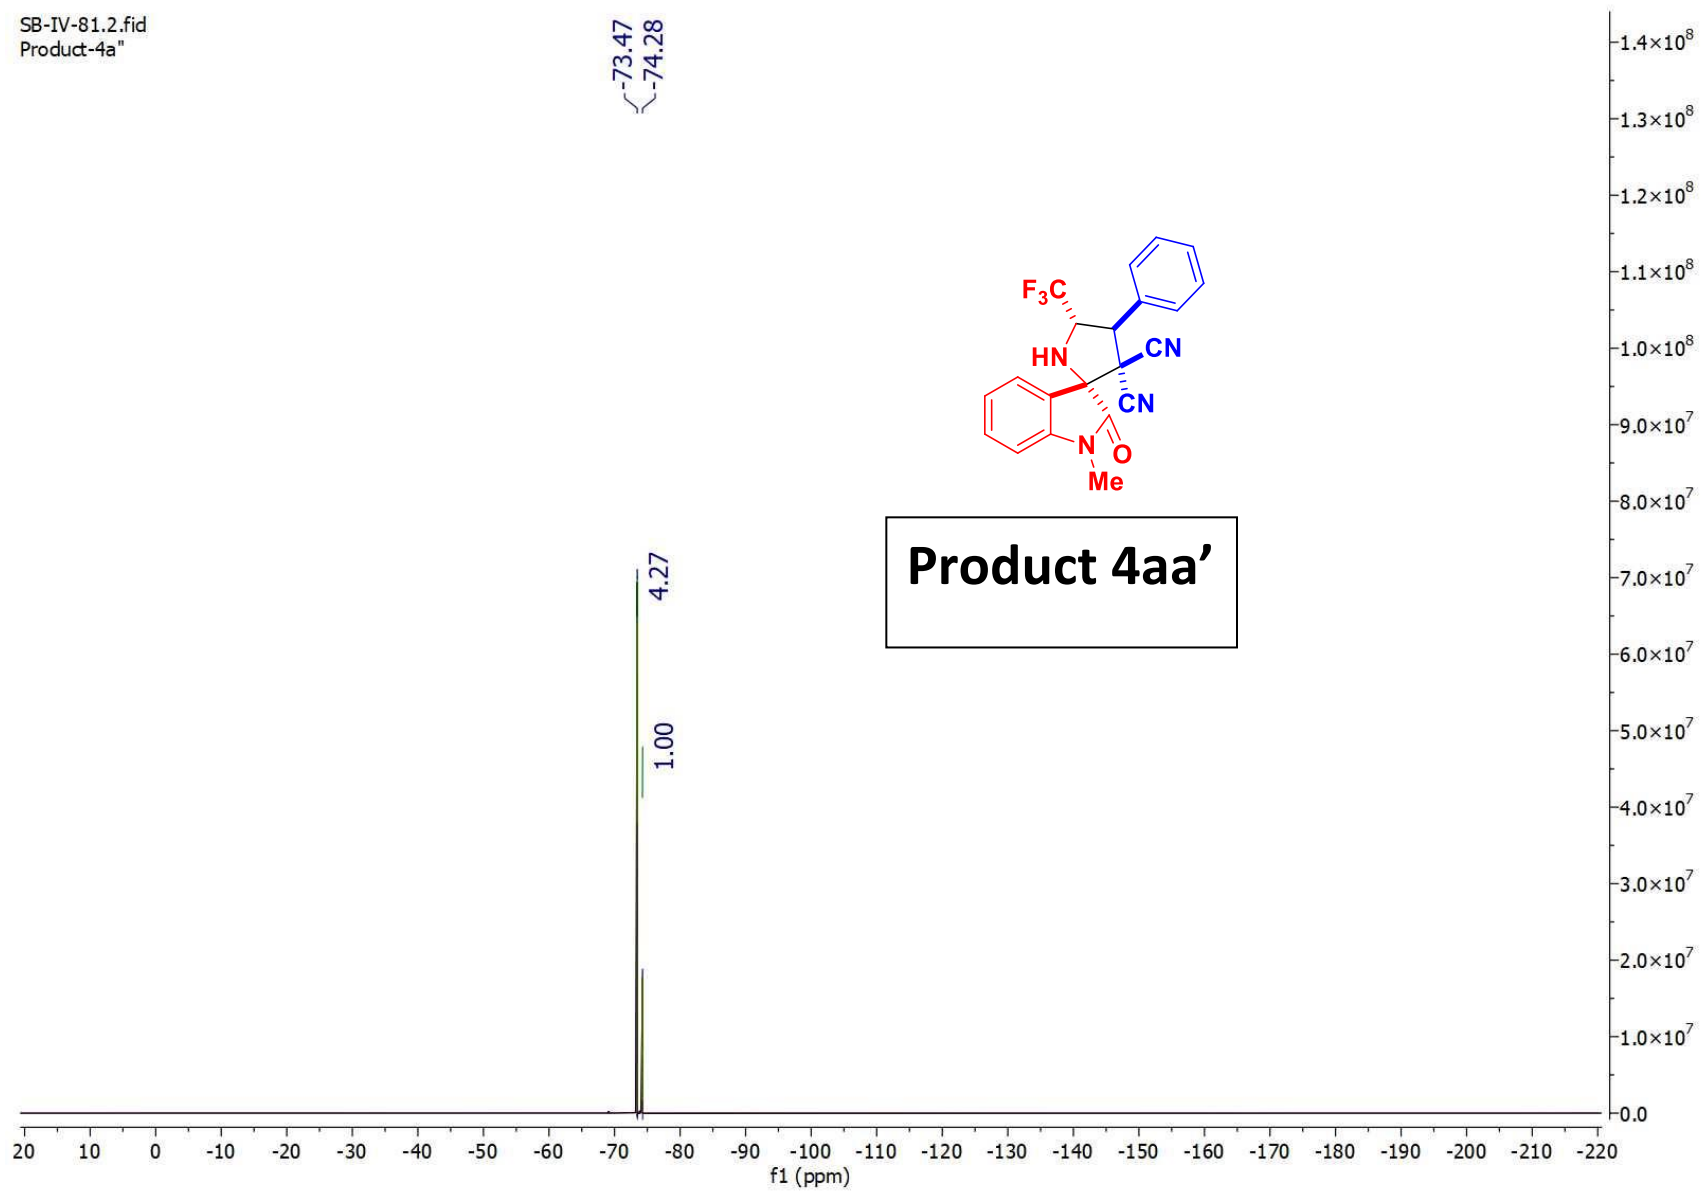

### HPLC data of racemic 4a

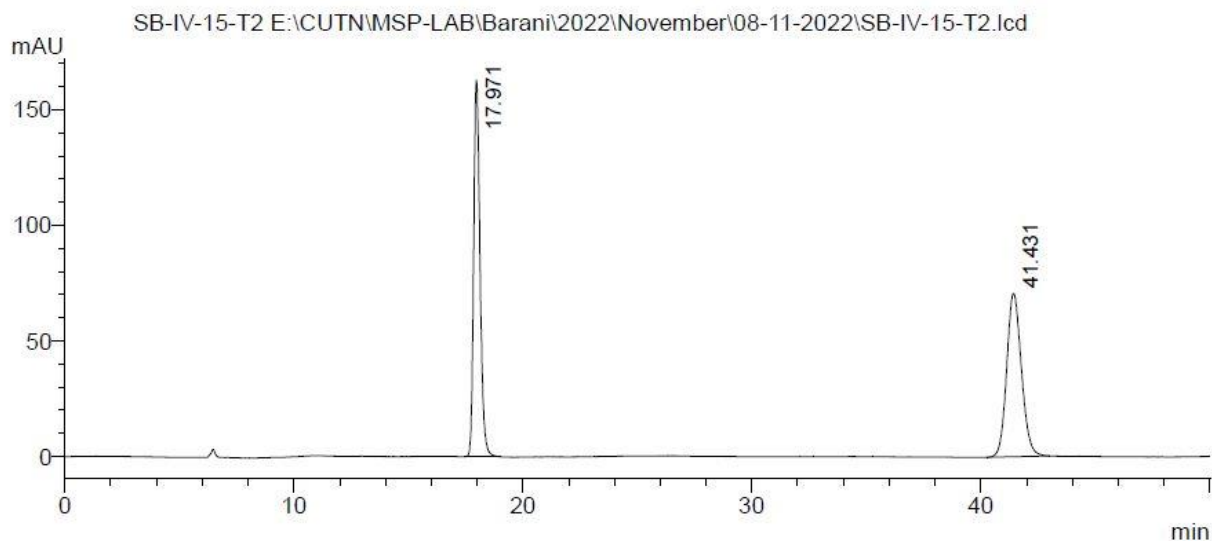

PDA Ch1 254nm

| Peak # | Ret. Time (min) | Area    | Height | Area%   |
|--------|-----------------|---------|--------|---------|
| 1      | 17.971          | 3139022 | 162774 | 49.797  |
| 2      | 41.431          | 3164587 | 70692  | 50.203  |
| Total  |                 | 6303609 | 233466 | 100.000 |

### HPLC data of chiral 4a : 87% ee

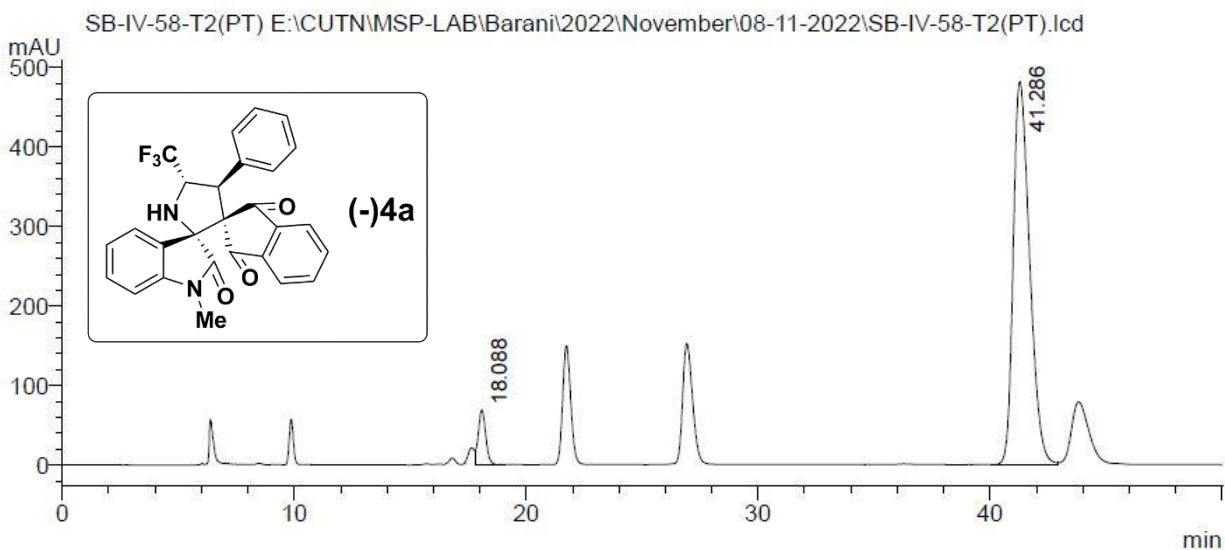

PDA Ch1 254nm

| Peak # | Ret. Time (min) | Area     | Height | Area%   |
|--------|-----------------|----------|--------|---------|
| 1      | 18.088          | 1566722  | 69194  | 6.199   |
| 2      | 41.286          | 23708096 | 481993 | 93.801  |
| Total  |                 | 25274818 | 551187 | 100.000 |

HPLC data of racemic 4c

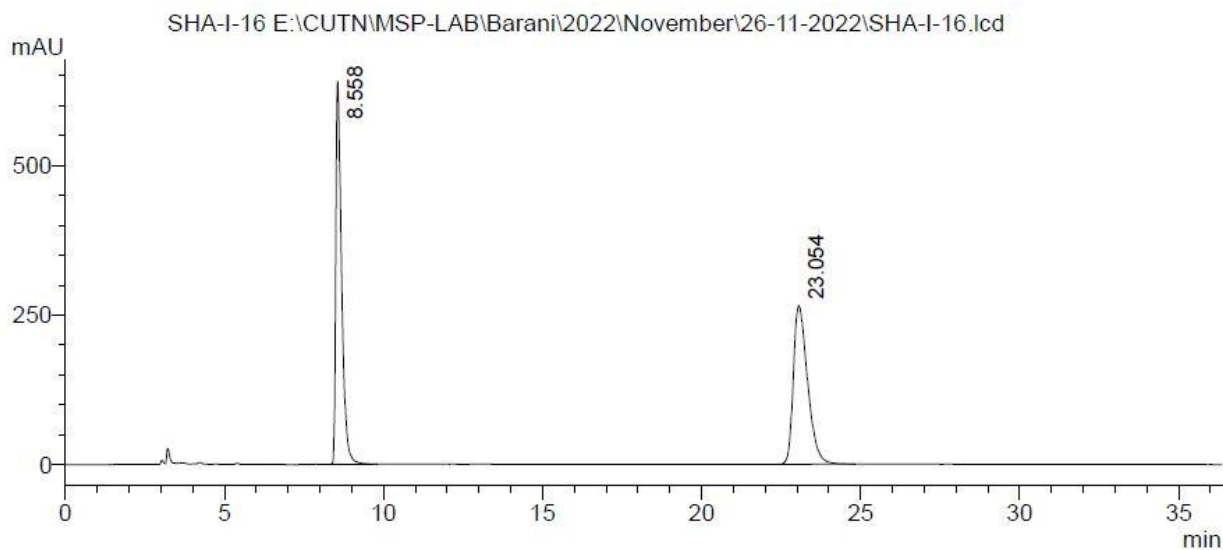

PDA Ch1 254nm

| Peak # | Ret. Time (min) | Area     | Height | Area%   |
|--------|-----------------|----------|--------|---------|
| 1      | 8.558           | 8197741  | 640339 | 49.772  |
| 2      | 23.054          | 8272916  | 265373 | 50.228  |
| Total  |                 | 16470657 | 905711 | 100.000 |

HPLC data of chiral 4c : 32% ee

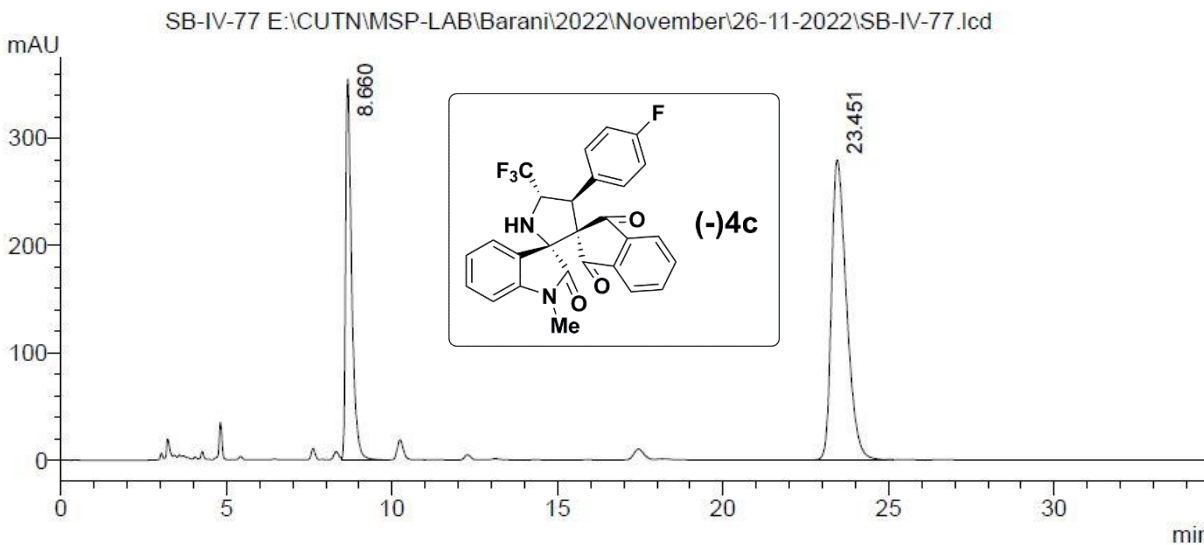

PDA Ch1 254nm

| Peak # | Ret. Time (min) | Area     | Height | Area%   |
|--------|-----------------|----------|--------|---------|
| 1      | 8.660           | 4528142  | 354976 | 33.828  |
| 2      | 23.451          | 8857571  | 279422 | 66.172  |
| Total  |                 | 13385714 | 634398 | 100.000 |

### HPLC data of racemic 4m

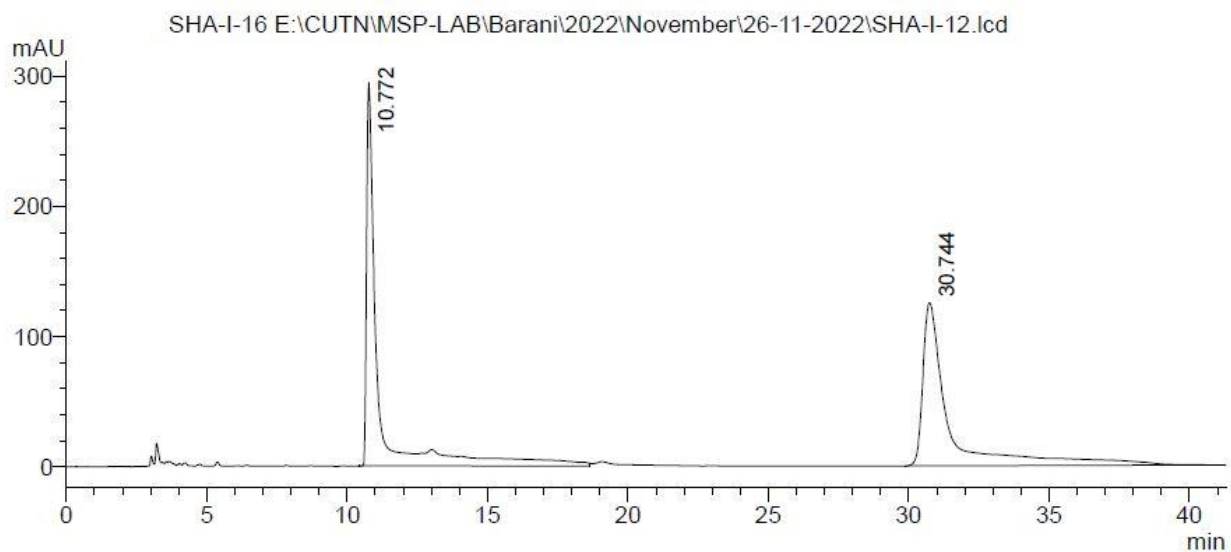

PDA Ch1 254nm

| Peak # | Ret. Time (min) | Area     | Height | Area%   |
|--------|-----------------|----------|--------|---------|
| 1      | 10.772          | 8234468  | 294133 | 50.562  |
| 2      | 30.744          | 8051369  | 125143 | 49.438  |
| Total  |                 | 16285837 | 419277 | 100.000 |

### HPLC data of chiral 4m : 38% ee

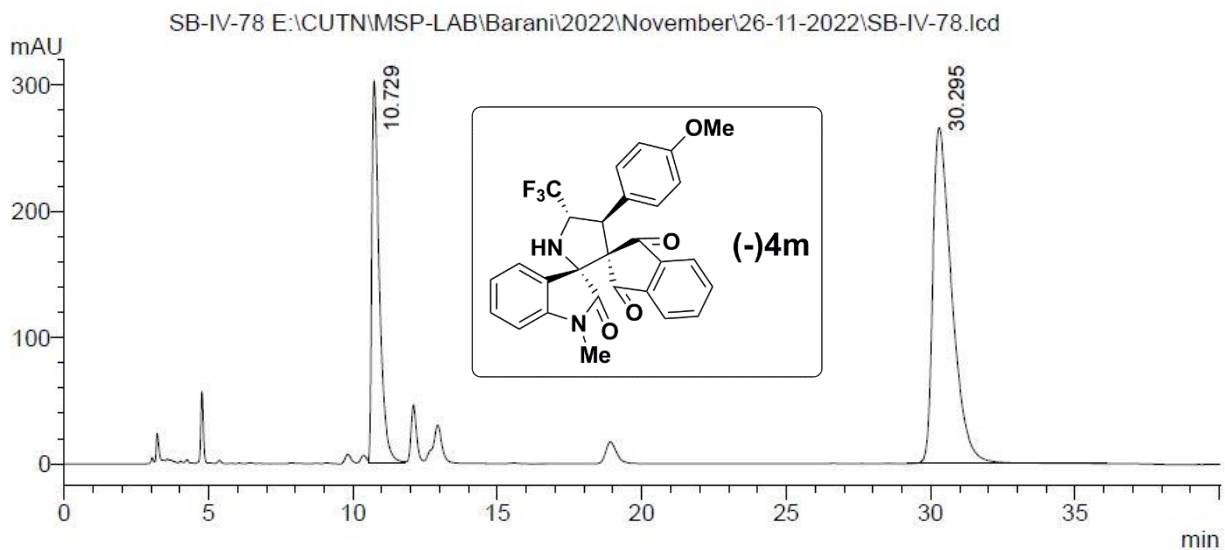

PDA Ch1 254nm

| Peak # | Ret. Time (min) | Area     | Height | Area%   |
|--------|-----------------|----------|--------|---------|
| 1      | 10.729          | 5480166  | 303134 | 30.953  |
| 2      | 30.295          | 12224808 | 266192 | 69.047  |
| Total  |                 | 17704973 | 569326 | 100.000 |



### HPLC data of racemic 4z

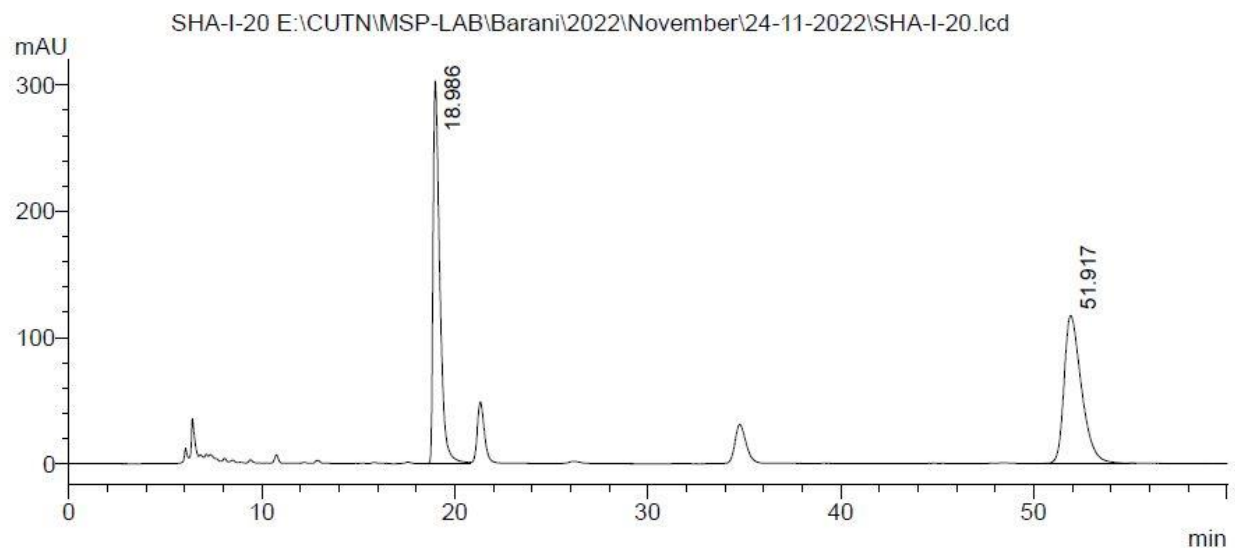

PDA Ch1 254nm

| Peak # | Ret. Time (min) | Area     | Height | Area%   |
|--------|-----------------|----------|--------|---------|
| 1      | 18.986          | 7317794  | 303097 | 49.837  |
| 2      | 51.917          | 7365640  | 117171 | 50.163  |
| Total  |                 | 14683434 | 420268 | 100.000 |

### HPLC data of chiral 4z : 90% ee

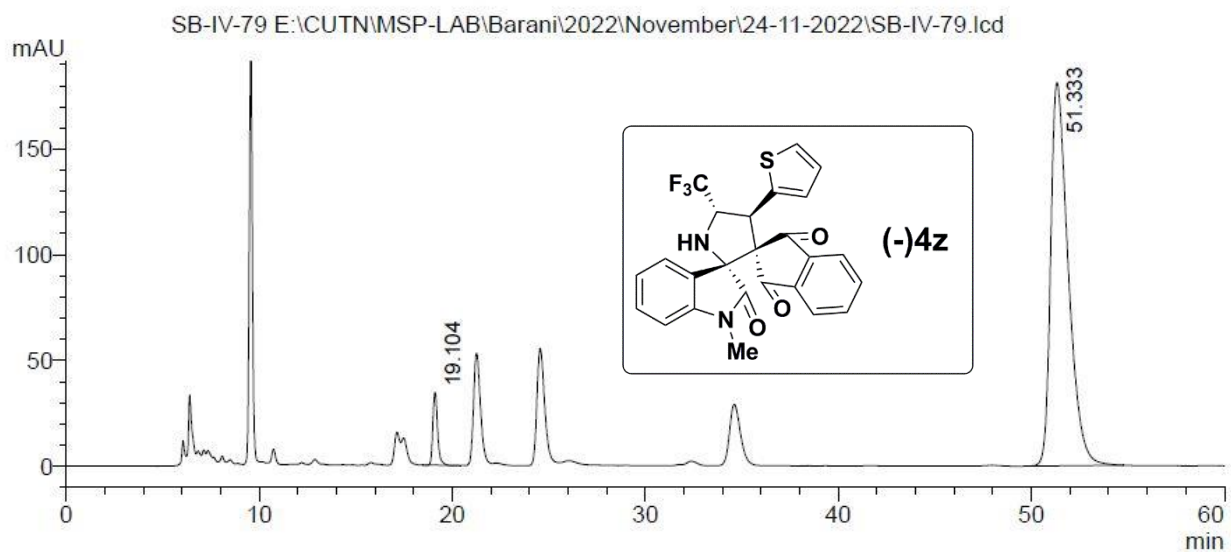

PDA Ch1 254nm

| Peak # | Ret. Time (min) | Area     | Height | Area%   |
|--------|-----------------|----------|--------|---------|
| 1      | 19.104          | 585200   | 34533  | 4.845   |
| 2      | 51.333          | 11494299 | 181323 | 95.155  |
| Total  |                 | 12079500 | 215857 | 100.000 |
